# Supplementary material for: Transcriptome Analysis Reveals Molecular Underpinnings of Common Carp (Cyprinus carpio) Under Hypoxia Stress
Source: Front Genet. 2022 May 20;13:907944. doi: 10.3389/fgene.2022.907944 (PMC9163828; doi:10.3389/fgene.2022.907944)
Supplement: Supplementary file 1 [file DataSheet1.xlsx]

## Sheet: S1
Supplementary Table 1. Oxygen reduction rate in experimental group
Time	DO（mg/mL）
0h0min	6.8	stop oxygenation
0h15min	4.2
0h30min	3.16
0h45min	2.69
1h0min	2.27
1h15min	1.98
1h30min	1.57
1h45min	1.31
2h0min	1.08
2h15min	1.02
2h30min	1.04
3h0min	1.01
3h30min	1.03
4h0min	0.99
6h0min	0.98
8h0min	1.02
10h0min	1.03
12h0min	1.02	overnight
20h0min	1.01
22h0min	0.98
24h0min	1.03
26h0min	1.02	sample

## Sheet: S2
Supplementary Table 2. Primers used for the qRT-PCR analysis of differently expressed genes
Gene ID	Gene	Gene Symbol	Primer
HHLG5g0391	Heat shock 70 kDa protein	hsp70	F-ACGAGGCAGTGGCTTATGGT
			R-TCTGGGTCTGTTTGGTGGGGAT
HHLG31g0051	Vascular endothelial growth factor A-A	vegfaa	F-CCCAAAGAAGGGATGAAGAGC
			R-GAACCACGCAGGACGGGA
HHLG6g0109	Transcription factor jun-B	junb	F-CGCCACCCATGTCTCCG
			R-GCACCTTCACTTTCTCCTCCA
HHLG30g0609	Neutral amino acid transporter B(0)	slc1a5	F-CTGCCCACCAACGATCTGTC
			R-AAGGCTTCCCTGTTTTCCGA
HHLG12g0158	Nuclear factor interleukin-3-regulated protein	nfil3	F-GTGTCAACAACCCAGCCCCT
			R-CTGATCCATGTCCTCAACCCTTT
HHLG31g0362	Solute carrier family 2, facilitated glucose transporter member 3	slc2a3	F-TGAAGGACAGTAAGGGGAAGCA
			R-CGCCAACATTGAAAATGGAA
HHLG6g0151	Erythropoietin receptor	epor	F-CAAAACCCCATTCTTCACGACTC
			R-CTCCACCTTGCCCATGTTACTTC
HHLG44g0239	Protein FAM26F	fam26f	F-GCAACATCAAATCCTCCCTCA
			R-TCCTTTTCAATCAACTCCTCCA
HHUNg1730	Heat shock 70 kDa protein 1	hsp71	F-TTCAAGAGGAAGCACAAGAAGGA
			R-TGGTGATGGACGTGTAGAAGTCG

## Sheet: S3
Supplementary Table 3. Summary of the Illumina HiSeq X ten sequencing output
Sample	Raw Bases Number	Raw Reads Number	Clean Bases Number	Clean Reads Number	Clean Reads Rate(%)	Alignment Reads	Low-quality Reads Rate(%)	Ns Reads Rate(%)	Adapter Polluted Reads Rate (%)	Raw Q30 Bases Rate(%)
MHBN1	7006164300	2335388100	6623683200	2207894400	94.5408	92.94	0.53	0	4.93	93.7
MHBN2	7381266000	2460422000	6963064200	2321021400	94.3343	91.74	0.88	0	4.79	93.02
MHBN3	6920794500	2306931500	6702510000	2234170000	96.846	93.04	0.66	0	2.49	93.3
MHBN4	7021876500	2340625500	6505238700	2168412900	92.6425	92.08	0.84	0	6.52	93.43
MHBN5	6970395600	2323465200	6719961900	2239987300	96.4072	91.88	0.87	0	2.72	93.12
MHBH1	6929421000	2309807000	6715952400	2238650800	96.9194	92.54	0.63	0	2.45	93.39
MHBH2	7582935300	2527645100	7164052500	2388017500	94.476	92.21	0.82	0	4.71	93.27
MHBH3	7003698600	2334566200	6772968900	2257656300	96.7056	92.92	0.7	0	2.6	93.72
MHBH4	7037087400	2345695800	6779302200	2259767400	96.3368	92.33	0.71	0	2.95	93.41
MHBH5	6468855600	2156285200	6196616100	2065538700	95.7915	92.2	0.74	0	3.47	93.18
MSPN1	6438330600	2146110200	6173099100	2057699700	95.8804	92.36	0.76	0	3.36	93.06
MSPN2	7082692800	2360897600	6747419700	2249139900	95.2663	92.16	0.69	0	4.04	93.15
MSPN3	6341571300	2113857100	6050365800	2016788600	95.408	92.73	0.66	0	3.93	92.75
MSPN4	6311355000	2103785000	6082370400	2027456800	96.3719	91.95	0.82	0	2.81	92.99
MSPN5	6330906300	2110302100	6143883900	2047961300	97.0459	93.33	0.58	0	2.37	93.12
MSPH1	7010964900	2336988300	6657194100	2219064700	94.954	92.06	0.85	0	4.2	93.38
MSPH2	6837777900	2279259300	6630449100	2210149700	96.9679	92.61	0.62	0	2.41	93.43
MSPH4	6519125400	2173041800	6317409900	2105803300	96.9058	92.43	0.66	0	2.44	93.25
MSPH5	6981403800	2327134600	6711811200	2237270400	96.1384	92.47	0.68	0	3.18	93.04
MSPH6	6668583600	2222861200	6363145200	2121048400	95.4197	93.22	0.4	0	4.18	93.33
MF1N1	6438330600	2146110200	6607129500	2202376500	102.622	92.96	0.51	0	2.65	93.41
MF1N2	7082692800	2360897600	6642021300	2214007100	93.7782	92.85	0.68	0	2.88	93.26
MF1N3	6341571300	2113857100	6597699300	2199233100	104.039	92.73	0.53	0	2.27	93.28
MF1N4	6311355000	2103785000	6815820900	2271940300	107.993	92.91	0.55	0	3	93.3
MF1N5	6330906300	2110302100	6151740600	2050580200	97.17	92.1	0.67	0	5.25	92.69
MF1H1	7303652100	2434550700	7059418800	2353139600	96.656	92.93	0.66	0	2.68	93.46
MF1H2	7029044700	2343014900	6786301200	2262100400	96.5466	91.81	0.85	0	2.6	91.86
MF1H3	7409460900	2469820300	7006844700	2335614900	94.5662	92.95	0.52	0	4.91	93.79
MF1H4	6999381300	2333127100	6738433500	2246144500	96.2718	92.75	0.64	0	3.09	93.43
MF1H5	7198013100	2399337700	6926198700	2308732900	96.2238	92.72	0.58	0	3.19	93.5
LHBN1	8304245400	2768081800	8024830800	2674943600	96.6353	90.49	0.58	0	2.64	94.59
LHBN2	8352540900	2784180300	8029732200	2676577400	96.1352	90.65	0.63	0	3.07	94.8
LHBN3	9006315000	3002105000	8731632600	2910544200	96.9501	91.39	0.45	0	2.49	95.03
LHBN5	7310452200	2436817400	7136569800	2378856600	97.6215	91.5	0.45	0	1.81	94.98
LHBN6	9198152400	3066050800	8890117200	2963372400	96.6511	91.61	0.51	0	2.7	94.9
LHBH1	11351232300	3783744100	11059207500	3686402500	97.4274	91.2	0.44	0	2.02	94.91
LHBH2	9120381600	3040127200	8840966400	2946988800	96.9364	92.08	0.55	0	2.39	94.83
LHBH3	7725932400	2575310800	7437612900	2479204300	96.2682	91.72	0.51	0	3.09	94.99
LHBH4	6800906100	2266968700	6544252500	2181417500	96.2262	91.8	0.91	0	2.67	94.71
LHBH5	11221178100	3740392700	10797790800	3599263600	96.2269	91.56	0.48	0	3.16	94.78
LSPN1	8192023500	2730674500	7929562800	2643187600	96.7961	92.4	0.51	0	2.55	94.84
LSPN3	12003332100	4001110700	11602715400	3867571800	96.6625	91.84	0.61	0	2.56	94.67
LSPN4	8622172800	2874057600	8375157600	2791719200	97.1351	92.93	0.5	0	2.24	94.85
LSPN5	7651147800	2550382600	7427874600	2475958200	97.0818	92.65	0.59	0	2.18	94.84
LSPN6	8720823300	2906941100	8349921000	2783307000	95.7469	92.33	0.61	0	3.49	94.62
LSPH1	7423606200	2474535400	7188866100	2396288700	96.8379	92.6	0.67	0	2.32	94.55
LSPH2	7525290300	2508430100	7253840400	2417946800	96.3928	91.88	0.69	0	2.74	94.44
LSPH3	6275574900	2091858300	6075774000	2025258000	96.8162	91.96	0.53	0	2.5	94.91
LSPH5	6187527300	2062509100	5993763600	1997921200	96.8685	92.23	0.54	0	2.45	94.84
LSPH6	9885778800	3295259600	9606778800	3202259600	97.1778	92.57	0.53	0	2.15	94.98
LF1N1	9813032400	3271010800	9577772400	3192590800	97.6026	93.04	0.52	0	1.73	94.99
LF1N2	10933928700	3644642900	10590017100	3530005700	96.8546	92.27	0.57	0	2.42	94.88
LF1N3	8706770400	2902256800	8372631000	2790877000	96.1623	92.68	0.67	0	3.01	94.68
LF1N4	7204738500	2401579500	6943790700	2314596900	96.3781	92.35	0.61	0	2.85	94.56
LF1N5	7204131600	2401377200	6977142900	2325714300	96.8492	91.45	0.75	0	2.22	94.58
LF1H1	9334358400	3111452800	8703827400	2901275800	93.2451	92.65	0.51	0	6.1	94.8
LF1H3	7724722500	2574907500	7414733700	2471577900	95.9871	91.94	0.6	0	3.23	94.45
LF1H4	8282498700	2760832900	8014698600	2671566200	96.7667	92.91	0.56	0	2.52	94.7
LF1H5	8468127000	2822709000	8196782700	2732260900	96.7957	92.32	0.57	0	2.48	94.63
LF1H6	7197083400	2399027800	6988632900	2329544300	97.1037	92.4	0.56	0	2.19	94.53

## Sheet: S4
Supplementary Table 4. The DEGs of Hebao red carp muscle under hypoxia stress
Row.names	baseMean	log2FoldChange	lfcSE	stat	pvalue	padj	change	MHBN1	MHBN2	MHBN3	MHBN4	MHBN5	MHBH1	MHBH2	MHBH3	MHBH4	MHBH5
MSTRG.29360	11670.5	8.43405	0.339172	24.8666	1.71141e-136	6.46862e-132	Up	69.9985	33.5382	100.196	36.234	96.5811	16854	36573.5	19811.2	18451.6	24678.3
MSTRG.23709	13656.3	9.04198	0.373301	24.2217	1.31488e-129	2.48493e-125	Up	73.0419	23.5674	65.5128	19.9287	76.7475	18612.5	42602.3	23272.2	23936.6	27880.8
MSTRG.4349	4589.35	6.88486	0.326435	21.0911	9.60504e-99	1.21014e-94	Up	47.6801	56.1992	133.916	48.01	99.1681	5952.69	8440.3	7955.23	9674.7	13485.6
MSTRG.25159	19637.5	8.42829	0.400302	21.0548	2.06511e-98	1.95137e-94	Up	150.142	88.8309	181.124	24.4579	124.176	29978.7	62270.4	32694	32633.4	38229.4
MSTRG.25162	5653.63	7.78612	0.374185	20.8082	3.64624e-96	2.75634e-92	Up	39.5644	29.006	79.9642	23.5521	82.7838	7551.52	18995.2	9935.7	8606.3	11192.7
MSTRG.3552	1567.05	4.01754	0.195808	20.5178	1.49366e-93	9.4093e-90	Up	202.894	134.153	233.149	162.147	179.365	2403.35	3381.31	2674.89	2779.18	3520.1
MSTRG.2185	2290.98	6.66144	0.337983	19.7094	1.79111e-86	9.67125e-83	Up	23.3328	19.0352	55.8786	63.4095	62.0878	4669.36	6696.02	4070.2	3766.57	3483.88
MSTRG.13161	5640.84	4.14839	0.213812	19.402	7.41549e-84	3.50354e-80	Up	567.089	534.798	680.177	702.939	526.022	10063.4	9056.73	9591.27	8364.22	16321.7
MSTRG.20692	2059.61	4.82315	0.251897	19.1473	1.0202e-81	4.28451e-78	Up	124.78	153.188	152.221	123.196	149.183	4436.45	6007.34	2555.45	2733.43	4160.88
MSTRG.23708	1502.07	8.45732	0.446245	18.9522	4.23485e-80	1.60065e-76	Up	4.05788	2.71931	13.4879	15.3994	6.89865	1548.72	5431.55	2327.68	2292.15	3378.02
MSTRG.24735	1937.68	5.13133	0.289167	17.7452	1.87614e-70	6.44659e-67	Up	125.794	135.059	82.8545	105.079	88.8201	4101.46	6429.58	2358.24	2808.72	3141.21
MSTRG.30124	615.899	5.10593	0.309353	16.5052	3.36466e-61	1.05978e-57	Up	48.6946	25.3803	24.0856	34.4223	41.3919	1390.04	1379.62	1632.34	946.407	636.599
MSTRG.6698	3412.04	4.30785	0.263658	16.3388	5.22691e-60	1.51971e-56	Up	340.862	507.605	269.759	307.989	213.858	6008.36	9493.64	6450.66	5777.56	4750.12
MSTRG.2082	1983.33	4.4384	0.272667	16.2777	1.42015e-59	3.8341e-56	Up	185.648	204.855	185.941	135.877	162.118	4118.17	2507.48	3357.27	2608.58	6367.39
MSTRG.4746	2160.18	3.61189	0.22466	16.0772	3.68897e-58	9.29548e-55	Up	352.021	288.247	247.6	337.882	407.02	4009.6	3987.58	3071.17	3097.51	5803.22
MSTRG.23666	616.639	7.91792	0.493968	16.0292	7.98899e-58	1.88725e-54	Up	0	3.62575	0.963424	9.0585	11.2103	927.005	1778.15	764.783	1098.9	1572.69
MSTRG.29552	2580.03	2.96737	0.185171	16.0251	8.53928e-58	1.89858e-54	Up	598.538	604.594	525.066	622.319	574.313	4322.31	4544.17	3333.2	6374.19	4301.57
MSTRG.18105	1044	3.22538	0.211067	15.2813	1.01834e-52	2.13835e-49	Up	208.981	165.878	223.514	177.547	232.829	2436.75	2082.98	1929.55	1742.23	1239.77
MSTRG.11505	5512.23	3.02659	0.200585	15.0888	1.91981e-51	3.81911e-48	Up	1293.45	986.204	1529.92	908.567	1307.29	11559.3	10910.5	9923.66	7068.03	9635.36
MSTRG.3177	2153.16	6.30229	0.422779	14.9068	2.97691e-50	5.62591e-47	Up	67.9696	14.503	48.1712	32.6106	106.067	4528.31	6600.05	3223.01	2456.08	4454.8
MSTRG.4975	4322.33	3.65489	0.250058	14.6162	2.21575e-48	3.98803e-45	Up	880.561	431.464	756.288	425.749	685.553	7359.43	10498.4	7023.78	6242.67	8919.36
MSTRG.24114	3273.9	5.15707	0.356705	14.4575	2.24663e-47	3.85982e-44	Up	187.677	141.404	90.5618	235.521	237.141	6710.81	12241.6	4205.38	4672.95	4016.01
MSTRG.4149	2670.06	3.34322	0.231845	14.4201	3.86912e-47	6.35831e-44	Up	550.858	571.962	313.113	407.632	551.03	5086.93	5428.17	3683.18	3759.9	6347.89
MSTRG.14335	1112.27	4.02632	0.279514	14.4047	4.83355e-47	7.61224e-44	Up	101.447	121.463	184.014	124.101	112.103	1623.88	1160.6	2250.83	2410.34	3033.95
MSTRG.7990	1291.19	2.07946	0.144626	14.3782	7.09032e-47	1.07197e-43	Up	466.657	575.588	528.92	446.584	452.724	2007.12	1897.83	1893.44	2456.08	2187
MSTRG.18349	1467.93	4.52832	0.320829	14.1145	3.09403e-45	4.49789e-42	Up	138.983	107.866	96.3424	163.959	102.617	3405.51	4975.44	1953.62	1571.63	2163.32
MSTRG.23668	358.902	9.1216	0.651771	13.9951	1.66994e-44	2.33773e-41	Up	0	0	0	1.8117	4.31166	518.714	1046.57	497.202	532.771	987.635
MSTRG.2415	508.138	3.38561	0.245489	13.7913	2.87402e-43	3.87962e-40	Up	65.9406	91.5502	76.1105	128.631	81.0591	1162.7	841.095	910.147	637.61	1086.54
MSTRG.13445	1788.84	5.52711	0.405349	13.6354	2.46498e-42	3.21272e-39	Up	60.8683	29.006	175.343	36.234	78.4721	3011.14	3023.42	3589.67	3093.69	4790.52
MSTRG.4745	3090.62	3.6725	0.270601	13.5716	5.89881e-42	7.43191e-39	Up	609.697	426.932	238.929	468.324	503.601	5152.81	6113.46	4417.41	4519.5	8455.49
MSTRG.8327	8880.86	3.18215	0.234993	13.5415	8.89767e-42	1.08486e-38	Up	1946.77	2316.86	1140.69	1201.16	2207.57	15361.9	15486.3	18362.2	13064.8	17720.3
MSTRG.3696	272.881	6.43125	0.484481	13.2745	3.25335e-40	3.84271e-37	Up	12.1737	2.71931	8.67081	8.15265	0	315.497	729.325	414.798	726.246	511.23
MSTRG.18388	594.762	3.80727	0.287698	13.2336	5.61516e-40	6.4314e-37	Up	128.838	65.2635	105.977	52.5393	44.8412	914.942	1174.15	1209.21	1136.07	1115.79
MSTRG.20449	1432.08	2.48869	0.191296	13.0096	1.07888e-38	1.19936e-35	Up	482.888	396.113	458.59	392.233	435.477	2149.09	2689.25	2174.91	1821.33	3320.9
MSTRG.13130	244.177	3.82342	0.294084	13.0011	1.20583e-38	1.30219e-35	Up	19.2749	32.6318	42.3907	40.7632	25.8699	358.182	316.116	444.426	593.768	568.343
MSTRG.19063	3694.01	6.61597	0.511289	12.9398	2.68377e-38	2.81773e-35	Up	159.272	48.9476	16.3782	37.1398	111.241	5859.89	14626	5234.04	3549.27	7297.91
MSTRG.11485	263.055	2.14404	0.166448	12.8811	5.74797e-38	5.87178e-35	Up	107.534	76.1408	106.94	90.585	104.342	399.011	424.499	441.648	432.698	447.152
MSTRG.19064	742.591	6.46932	0.505796	12.7904	1.85607e-37	1.79882e-34	Up	8.11577	10.8773	5.78054	14.4936	43.1166	1511.6	2477	857.372	630.938	1866.62
MSTRG.69	1767.33	3.27694	0.260481	12.5804	2.70745e-36	2.55834e-33	Up	324.631	402.458	325.637	340.6	259.562	3984.54	4983.35	2224.91	2481.82	2345.81
MSTRG.8081	3138.24	4.0785	0.32523	12.5403	4.49036e-36	4.13956e-33	Up	522.453	169.504	322.747	345.129	394.085	3964.13	6697.15	6164.56	3574.05	9228.6
MSTRG.4148	2861.69	3.11891	0.252576	12.3484	4.96894e-35	4.26844e-32	Up	503.178	583.746	402.711	561.627	901.998	6401.81	5422.52	3907.25	3751.32	6180.73
MSTRG.8543	6241.95	3.42963	0.278352	12.3212	6.96321e-35	5.84863e-32	Up	1305.62	455.032	1544.37	1007.3	989.094	9466.77	12362.4	11361.6	10976.6	12950.7
MSTRG.6070	113.31	5.4799	0.445528	12.2998	9.08003e-35	7.46083e-32	Up	2.02894	1.81288	3.8537	9.0585	7.76098	245.902	274.344	149.994	163.93	274.42
MSTRG.17855	215.516	2.21901	0.186011	11.9294	8.31697e-33	6.68843e-30	Up	66.9551	92.4567	74.1836	81.5265	65.5372	331.272	392.887	308.321	363.123	378.895
MSTRG.4422	2411.64	3.6355	0.317797	11.4397	2.64799e-30	2.08513e-27	Up	476.801	231.142	405.601	300.742	382.013	3655.13	8456.11	4202.6	3085.12	2921.11
MSTRG.22938	4266.17	3.27813	0.286701	11.434	2.82846e-30	2.18178e-27	Up	846.069	551.114	1055.91	599.673	933.905	5210.34	11717.7	7123.78	4983.65	9639.54
MSTRG.17880	3731.79	8.1728	0.715156	11.428	3.03026e-30	2.24578e-27	Up	56.8104	5.43863	10.5977	19.9287	36.2179	6168.9	17228.3	3623.92	3346.26	6821.5
MSTRG.22647	1193.98	2.64592	0.231519	11.4285	3.01181e-30	2.24578e-27	Up	308.399	304.563	286.137	296.213	449.275	2083.21	2852.95	2313.79	1602.13	1443.14
MSTRG.8213	929.123	3.47781	0.306081	11.3624	6.43746e-30	4.67917e-27	Up	175.503	188.539	127.172	163.959	110.378	2652.96	2236.52	1469.38	1296.19	870.623
MSTRG.3350	142.539	4.60101	0.414635	11.0965	1.30406e-28	9.29991e-26	Up	20.2894	6.34507	11.5611	9.96435	8.62331	202.289	480.948	188.881	312.61	183.876
MSTRG.24344	1272.62	3.95163	0.357238	11.0616	1.92574e-28	1.34791e-25	Up	119.708	246.551	128.135	203.816	74.1605	1493.04	2911.66	1694.37	1922.36	3932.43
MSTRG.24302	1143.13	2.92451	0.265015	11.0353	2.58283e-28	1.77497e-25	Up	242.459	380.704	139.696	279.002	288.019	2124.97	1660.74	1523.09	2201.61	2590.97
MSTRG.23830	942.057	4.47858	0.406414	11.0197	3.06995e-28	2.07205e-25	Up	61.8827	84.2987	74.1836	94.2084	89.6824	2171.36	4011.29	996.255	890.176	947.238
MSTRG.22185	161.902	3.70189	0.336093	11.0145	3.2538e-28	2.15761e-25	Up	38.5499	11.7837	27.9393	12.6819	25.0076	312.713	368.049	264.804	228.739	328.747
MSTRG.15019	1534.72	2.99725	0.272261	11.0087	3.46826e-28	2.26017e-25	Up	327.674	283.715	474.968	199.287	422.542	2284.57	3835.17	3156.35	1976.69	2386.2
MSTRG.1600	4764.31	2.0983	0.191186	10.9752	5.02873e-28	3.22154e-25	Up	2363.72	1285.33	2017.41	1691.22	1662.57	7735.25	7764.04	7731.16	6244.57	9147.81
MSTRG.12406	292.799	2.82172	0.259089	10.8909	1.27308e-27	8.01975e-25	Up	41.5933	56.1992	91.5253	86.9616	86.2331	453.759	614.168	598.123	489.883	409.541
MSTRG.5724	1597.6	3.50655	0.322404	10.8763	1.49574e-27	9.26797e-25	Up	114.635	226.609	373.808	172.111	404.433	3878.76	2569.57	2867.47	2390.32	2978.23
MSTRG.3210	8278.14	3.27089	0.301975	10.8316	2.43787e-27	1.4862e-24	Up	2524	961.731	1963.46	1245.54	1077.05	13415.1	14184.6	15458.6	10046.4	21904.9
MSTRG.27183	137.657	10.6525	0.983805	10.8279	2.54047e-27	1.52416e-24	Up	0	0	0	0	0	154.037	400.79	203.695	272.581	345.463
MSTRG.14525	990.573	2.59175	0.241769	10.7199	8.20516e-27	4.84579e-24	Up	238.401	280.089	310.222	243.674	336.309	1142.29	1675.42	1794.37	1300.95	2584.01
MSTRG.13353	579.172	5.05198	0.474764	10.641	1.91975e-26	1.11632e-23	Up	34.492	16.3159	26.0124	41.6691	50.8775	1197.96	2637.31	664.787	743.402	378.895
MSTRG.29257	1251.74	3.02061	0.284337	10.6234	2.32076e-26	1.32906e-23	Up	367.238	189.446	194.612	202.91	419.093	2639.04	2872.14	2173.98	1798.46	1660.45
MSTRG.18798	1166.5	5.14175	0.492599	10.438	1.66263e-25	9.24155e-23	Up	92.3169	142.311	35.6467	24.4579	26.7323	3410.15	3368.89	1289.76	1096.04	2178.65
MSTRG.18777	4909.52	3.07769	0.295232	10.4246	1.91381e-25	1.03847e-22	Up	1524.75	638.132	720.641	767.255	1548.75	10796.5	10513.1	8876.48	7258.65	6450.97
MSTRG.21931	4502.21	2.15157	0.206402	10.4242	1.92325e-25	1.03847e-22	Up	1847.35	1345.15	2212.98	1264.57	1601.35	6372.11	8467.4	5926.61	6905.06	9079.55
MSTRG.7849	7584.26	3.20853	0.309362	10.3714	3.34457e-25	1.78049e-22	Up	1208.23	1799.28	794.825	1209.31	2391.24	12789.7	21654	10178.3	10942.3	12875.5
MSTRG.13835	8371.24	2.17863	0.210121	10.3684	3.45118e-25	1.81173e-22	Up	3911.8	3308.5	3413.41	2165.89	2346.4	14448.8	15575.5	13464.3	10047.4	15030.4
MSTRG.1826	924.15	5.72523	0.561397	10.1982	2.02008e-24	1.0318e-21	Up	12.1737	40.7897	27.9393	87.8674	2.58699	2604.71	1498.16	2069.36	1251.39	1646.52
MSTRG.5933	379.426	2.25239	0.222674	10.1152	4.73053e-24	2.384e-21	Up	156.229	154.094	121.391	117.76	108.654	550.264	843.353	574.976	461.29	706.249
MSTRG.17324	1412.89	2.21365	0.219285	10.0948	5.82356e-24	2.89623e-21	Up	513.322	468.628	511.578	345.129	666.582	2159.3	2444.26	2399.9	1651.69	2968.48
MSTRG.18403	200.241	3.78629	0.377939	10.0183	1.2671e-23	6.2198e-21	Up	11.1592	24.4738	43.3541	17.2111	38.8049	319.209	520.463	234.25	324.047	469.44
MSTRG.2486	671.495	2.92133	0.292727	9.9797	1.87023e-23	8.94797e-21	Up	136.954	175.849	144.514	162.147	162.981	1041.14	1082.7	777.746	824.413	2206.51
MSTRG.24807	687.932	2.25311	0.225841	9.97656	1.93044e-23	9.00803e-21	Up	221.155	284.622	270.722	245.485	170.742	1047.64	1070.28	765.709	1405.79	1397.18
MSTRG.5768	734.611	2.65433	0.266029	9.9776	1.91028e-23	9.00803e-21	Up	302.312	146.843	184.014	125.913	248.351	1647.08	1301.72	1301.8	1014.08	1074
MSTRG.3125	869.006	3.04999	0.307183	9.92889	3.11692e-23	1.43671e-20	Up	161.301	147.749	197.502	220.121	209.546	1342.72	2432.97	2074.91	1157.99	745.253
MSTRG.27677	223.603	10.1979	1.02897	9.91083	3.73532e-23	1.70101e-20	Up	2.02894	0	0	0	0	145.685	914.479	419.427	375.513	378.895
MSTRG.2641	1137.12	2.99419	0.302714	9.89114	4.548e-23	2.04644e-20	Up	400.716	212.106	199.429	290.778	165.568	3186.52	2239.91	1660.12	1351.47	1664.63
MSTRG.10866	400.479	3.31886	0.341199	9.72704	2.31213e-22	1.02814e-19	Up	102.462	39.8833	79.9642	62.5036	80.1968	690.382	1238.5	712.933	366.935	631.027
MSTRG.17553	4329.79	3.61271	0.372198	9.70641	2.83128e-22	1.24435e-19	Up	809.548	304.563	453.773	412.162	1291.77	10910.6	10080.7	7472.84	6216.93	5344.93
MSTRG.4017	1501.81	2.19731	0.226494	9.70144	2.97279e-22	1.29152e-19	Up	586.364	660.793	562.64	394.045	484.63	3029.7	3183.74	1823.07	1826.1	2467
MSTRG.1440	267.823	4.47576	0.468214	9.55922	1.18647e-21	5.09603e-19	Up	11.1592	25.3803	36.6101	9.0585	32.7686	445.408	373.694	432.389	236.364	1075.39
MSTRG.12421	486.103	2.93774	0.309215	9.50065	2.08576e-21	8.85792e-19	Up	90.2879	154.094	135.843	45.2925	135.386	829.572	1020.6	656.454	734.824	1058.68
MSTRG.24744	1551.71	3.42084	0.360261	9.49544	2.19286e-21	9.10809e-19	Up	290.139	384.33	150.294	342.411	157.807	2639.04	1935.08	1869.37	2334.09	5414.58
MSTRG.23359	657.488	2.23414	0.23528	9.49567	2.18797e-21	9.10809e-19	Up	239.415	194.884	193.648	191.134	332.86	909.374	842.224	969.404	1286.66	1415.28
MSTRG.23200	2863.6	2.30775	0.243999	9.45804	3.13779e-21	1.28912e-18	Up	1181.86	1346.97	565.53	962.012	755.402	5163.95	4614.17	3983.17	4222.14	5840.83
MSTRG.13432	6542.39	2.59388	0.274968	9.4334	3.97004e-21	1.6135e-18	Up	2011.7	1523.72	2758.28	1284.49	1718.63	7904.13	11970.6	10193.1	8409.97	17649.3
MSTRG.14827	686.316	2.88417	0.306099	9.42233	4.4119e-21	1.774e-18	Up	139.997	210.294	105.977	253.638	108.654	1748.23	1239.63	1076.81	762.463	1217.48
MSTRG.23052	556.788	2.43769	0.259051	9.41008	4.95775e-21	1.97251e-18	Up	209.995	140.498	163.782	144.03	209.546	961.338	1406.72	956.442	804.399	571.129
MSTRG.20268	627.003	3.07866	0.327731	9.39386	5.78381e-21	2.27719e-18	Up	126.809	210.294	73.2202	171.206	81.9215	1467.06	1328.82	782.375	766.275	1262.05
MSTRG.5476	339.907	3.43717	0.367168	9.36129	7.87719e-21	3.06942e-18	Up	55.7959	84.2987	36.6101	54.351	56.0515	804.518	333.051	770.338	291.642	912.413
MSTRG.20275	960.642	4.40218	0.471715	9.33229	1.03607e-20	3.99595e-18	Up	130.867	61.6378	74.1836	89.6791	77.6098	1855.87	4757.55	759.228	781.525	1018.28
MSTRG.13880	81.7739	4.55219	0.488456	9.31954	1.16842e-20	4.46087e-18	Up	6.08683	7.2515	7.70739	8.15265	4.31166	288.587	199.831	135.18	89.5894	71.0428
MSTRG.22554	2924.71	2.88165	0.310246	9.28829	1.56792e-20	5.92628e-18	Up	590.422	572.869	1077.11	429.373	824.389	3790.6	8080.15	4610.92	3169.94	6101.33
MSTRG.9483	317.604	-4.59278	0.495174	-9.27508	1.77493e-20	6.64226e-18	Down	636.073	317.253	848.776	400.386	845.085	18.5587	27.0957	11.1107	7.62463	64.0778
MSTRG.4039	557.353	4.6977	0.506554	9.27382	1.79591e-20	6.65489e-18	Up	85.2156	24.4738	59.7323	16.3053	21.5583	881.536	2069.43	359.244	1340.03	716
MSTRG.23319	1578.78	2.73021	0.295198	9.24872	2.27198e-20	8.33728e-18	Up	536.655	581.027	227.368	411.256	311.302	1901.33	3718.88	1972.14	2827.79	3300.01
MSTRG.11167	242.192	5.33136	0.577948	9.22462	2.84558e-20	1.03418e-17	Up	16.2315	14.503	7.70739	9.96435	10.348	455.615	1333.33	263.878	187.757	122.584
MSTRG.29539	1714.79	2.11058	0.228885	9.22114	2.93949e-20	1.05813e-17	Up	654.334	534.798	572.274	649.494	813.178	2820.92	4118.54	2774.89	2348.39	1861.04
MSTRG.10361	4121.68	2.67024	0.289855	9.21234	3.19097e-20	1.13782e-17	Up	1256.93	1229.13	1037.61	822.512	1249.52	3414.79	10025.4	5322	6812.61	10046.3
MSTRG.1639	470.158	2.83979	0.308853	9.19461	3.7636e-20	1.32947e-17	Up	124.78	178.568	145.477	74.2797	53.4645	813.797	637.877	913.851	820.601	938.88
MSTRG.10513	1065.71	4.24362	0.462478	9.17583	4.48127e-20	1.56832e-17	Up	84.2011	119.65	108.867	125.007	96.5811	1359.42	5432.68	1380.5	1342.89	607.347
MSTRG.5459	329.685	2.948	0.324072	9.09674	9.30801e-20	3.22766e-17	Up	92.3169	42.6026	67.4397	71.5621	104.342	806.373	852.385	437.019	399.34	423.471
MSTRG.1104	2744.1	3.85106	0.425554	9.04953	1.43579e-19	4.9335e-17	Up	456.512	171.317	664.762	172.111	313.889	2880.3	3505.5	4674.81	4257.4	10344.4
MSTRG.28502	84.4119	3.43347	0.380526	9.02296	1.83077e-19	6.17836e-17	Up	12.1737	7.2515	9.63424	16.3053	25.8699	133.622	169.348	133.328	215.396	121.191
MSTRG.29635	317.281	3.97641	0.44142	9.00822	2.09421e-19	7.00485e-17	Up	54.7814	19.0352	55.8786	9.96435	50.0152	550.264	641.264	374.059	414.589	1002.96
MSTRG.22057	519.244	2.93357	0.326675	8.9801	2.70509e-19	8.96879e-17	Up	92.3169	145.937	89.5984	163.959	108.654	899.167	626.587	517.571	921.627	1627.02
MSTRG.28057	180.186	3.94364	0.440103	8.96072	3.22554e-19	1.06014e-16	Up	13.1881	36.2575	39.5004	8.15265	12.935	191.154	290.149	343.504	511.803	355.214
MSTRG.28725	637.084	3.64106	0.406724	8.95216	3.48585e-19	1.13582e-16	Up	73.0419	89.7374	210.99	37.1398	62.0878	744.202	1698	914.777	1306.67	1234.19
MSTRG.1197	564.102	8.55715	0.958987	8.92312	4.53344e-19	1.46454e-16	Up	0	7.2515	7.70739	0	0	937.212	829.805	1238.84	941.642	1678.56
MSTRG.12023	185.317	2.58812	0.290618	8.90558	5.31072e-19	1.7011e-16	Up	52.7525	53.4798	51.0615	75.1855	31.9063	417.57	381.597	296.284	207.771	285.564
MSTRG.23968	647.611	2.77655	0.312733	8.87835	6.78621e-19	2.15545e-16	Up	198.836	222.077	137.77	131.348	134.524	1116.3	1284.79	704.6	668.108	1877.76
MSTRG.25534	302.066	2.70384	0.305293	8.85653	8.25419e-19	2.57838e-16	Up	96.3747	67.9828	56.842	62.5036	118.139	509.435	751.905	629.604	318.328	409.541
MSTRG.24788	151.076	3.06772	0.347611	8.82514	1.09325e-18	3.38703e-16	Up	52.7525	40.7897	14.4514	28.9872	24.1453	280.236	221.281	209.251	251.613	387.253
MSTRG.24901	576.736	2.48198	0.283097	8.76725	1.8309e-18	5.62623e-16	Up	211.01	158.627	122.355	152.183	231.105	746.986	1528.65	896.259	628.079	1092.11
MSTRG.20508	91.6143	2.61053	0.300984	8.67332	4.19684e-18	1.27926e-15	Up	18.2605	25.3803	36.6101	28.9872	19.8336	174.451	112.899	201.843	154.399	143.479
MSTRG.22604	174.067	2.6419	0.304649	8.67196	4.24749e-18	1.28434e-15	Up	42.6078	47.1348	37.5735	64.3153	48.2905	368.389	299.181	186.103	209.677	437.401
MSTRG.21268	3679.73	3.34906	0.386267	8.67032	4.30905e-18	1.29261e-15	Up	1154.47	305.47	491.346	538.075	799.381	7750.09	11163.4	6472.88	2883.06	5239.06
MSTRG.23269	712.027	2.69239	0.311913	8.63187	6.03549e-18	1.79625e-15	Up	192.749	215.732	205.209	164.865	175.053	1310.24	1007.06	760.154	761.51	2327.7
MSTRG.23625	1829.34	3.00953	0.356492	8.44208	3.11736e-17	9.13388e-15	Up	535.641	662.606	229.295	452.019	141.422	4062.49	2640.7	3262.83	3436.8	2869.57
MSTRG.25298	2119.44	2.58254	0.30647	8.42671	3.55522e-17	1.03367e-14	Up	722.303	1078.66	368.991	539.886	322.512	4071.77	3512.28	4114.64	3184.24	3279.11
MSTRG.9071	372.366	2.39638	0.285663	8.38882	4.91031e-17	1.40602e-14	Up	110.577	159.533	111.757	89.6791	122.451	824.004	457.239	463.87	449.853	934.701
MSTRG.15906	163.946	-25.3574	3.02638	-8.37879	5.34737e-17	1.51966e-14	Down	0	0	0	1152.24	487.217	0	0	0	0	0
MSTRG.2416	53.8094	4.04613	0.483702	8.36491	6.01598e-17	1.69691e-14	Up	4.05788	5.43863	8.67081	10.8702	1.72466	149.397	65.4812	89.8111	80.0586	122.584
MSTRG.19092	191.517	2.66654	0.320762	8.31314	9.32047e-17	2.60953e-14	Up	68.984	37.164	40.4638	38.0457	75.8851	366.533	487.722	279.618	208.724	312.031
MSTRG.12705	138.663	-25.1313	3.02642	-8.30396	1.00699e-16	2.79862e-14	Down	0	716.086	670.543	0	0	0	0	0	0	0
MSTRG.13718	493.017	2.80018	0.337355	8.30038	1.03782e-16	2.86325e-14	Up	113.621	158.627	91.5253	125.913	129.35	1445.72	996.895	720.341	811.07	337.105
MSTRG.1442	321.451	-25.0471	3.02629	-8.27652	1.26826e-16	3.47365e-14	Down	884.619	362.575	1967.31	0	0	0	0	0	0	0
MSTRG.24083	1782.99	2.55923	0.309603	8.26615	1.38349e-16	3.76199e-14	Up	435.208	709.741	299.625	668.517	472.558	2766.17	2518.77	2367.49	2212.1	5379.75
MSTRG.17964	4873.9	2.42458	0.294084	8.24452	1.65822e-16	4.47685e-14	Up	1863.58	1673.28	1055.91	2093.42	966.673	6266.33	13777	7060.82	6270.31	7711.63
MSTRG.25383	1876.75	3.97143	0.481979	8.23984	1.72443e-16	4.62258e-14	Up	289.124	160.44	231.222	177.547	266.46	3306.22	9745.41	1529.57	1527.79	1533.69
MSTRG.15948	3046.26	2.36068	0.286871	8.22907	1.88666e-16	5.02184e-14	Up	1226.5	1106.76	1017.38	558.909	1054.63	4416.03	4110.64	4410	3739.88	8821.85
MSTRG.29741	381.565	3.10913	0.378597	8.21224	2.17105e-16	5.73841e-14	Up	95.3603	127.808	29.8661	87.8674	55.1892	640.274	611.911	487.943	505.132	1174.3
MSTRG.19152	5889.35	2.43236	0.296499	8.20362	2.33259e-16	6.12257e-14	Up	1860.54	2673.09	1195.61	2401.41	1074.46	7791.85	14629.4	8020.96	8032.55	11213.6
MSTRG.25532	218.29	2.7904	0.340326	8.19918	2.42035e-16	6.30911e-14	Up	73.0419	43.509	40.4638	70.6563	48.2905	384.164	492.238	580.532	220.161	229.844
MSTRG.29476	37.0099	8.76173	1.0767	8.13758	4.03261e-16	1.04398e-13	Up	0	0	0	0	0	90.0095	29.3536	89.8111	119.135	41.7899
MSTRG.4060	211.89	2.97374	0.365786	8.12975	4.30191e-16	1.10612e-13	Up	54.7814	54.3863	21.1953	39.8574	68.9865	482.525	508.044	420.353	282.111	186.662
MSTRG.21393	8341.74	2.41793	0.297777	8.11992	4.6648e-16	1.19132e-13	Up	2996.75	1770.27	4267.97	1290.84	2823.27	12930.7	13796.2	12624.5	11991.6	18925.3
MSTRG.18249	1994.12	2.55795	0.31558	8.10555	5.25074e-16	1.33196e-13	Up	954.617	462.283	689.811	293.495	494.978	3721.01	3419.7	3122.09	2056.74	4726.44
MSTRG.7707	198.665	4.11931	0.508354	8.10323	5.35174e-16	1.34853e-13	Up	22.3184	14.503	24.0856	32.6106	14.6596	375.813	870.448	328.69	211.584	91.9378
MSTRG.24254	204.101	3.69266	0.456861	8.08267	6.33653e-16	1.5861e-13	Up	20.2894	19.9416	52.9883	14.4936	38.8049	186.514	669.489	257.397	547.067	234.023
MSTRG.12378	513.699	3.34303	0.414262	8.06985	7.03855e-16	1.75024e-13	Up	58.8393	32.6318	76.1105	173.017	119.864	900.095	1425.91	654.603	532.771	1163.15
MSTRG.25024	769.222	4.5655	0.566904	8.0534	8.05271e-16	1.98933e-13	Up	82.1721	28.0996	31.793	65.2212	104.342	1669.35	3963.87	554.607	376.466	816.296
MSTRG.23684	158.833	2.19741	0.273151	8.04465	8.64905e-16	2.12278e-13	Up	75.0709	52.5734	44.3175	44.3866	68.1242	222.704	378.21	244.434	262.097	196.413
MSTRG.3353	1508.16	2.4639	0.308614	7.98377	1.41934e-15	3.46109e-13	Up	561.002	388.862	410.419	582.461	371.665	3158.68	4447.08	1873.07	1721.26	1567.12
MSTRG.2275	112.984	4.62174	0.580706	7.95884	1.73662e-15	4.18082e-13	Up	8.11577	7.2515	4.81712	10.8702	12.935	185.587	538.526	219.435	81.0117	61.2918
MSTRG.28077	96.2102	24.0769	3.02657	7.9552	1.78847e-15	4.27839e-13	Up	0	0	0	0	0	0	0	0	725.293	236.809
MSTRG.12180	647.756	2.63718	0.332094	7.94106	2.00465e-15	4.7654e-13	Up	202.894	82.4858	252.417	120.478	238.866	628.21	1408.97	1364.76	1117.01	1061.46
MSTRG.14363	167.144	2.7966	0.354485	7.88921	3.04115e-15	7.18415e-13	Up	19.2749	61.6378	33.7198	60.6919	34.4932	335.912	278.86	174.993	270.674	401.183
MSTRG.26510	812.98	3.33497	0.422865	7.88661	3.10509e-15	7.28964e-13	Up	189.706	74.3279	225.441	45.2925	198.336	938.14	1026.25	1540.68	1343.84	2547.79
MSTRG.29529	1169.98	10.2558	1.30345	7.86824	3.59657e-15	8.39132e-13	Up	0	0	9.63424	0	0	1232.29	3424.22	1850.85	2605.72	2577.04
MSTRG.17812	173.225	3.39988	0.432714	7.85709	3.93152e-15	9.11653e-13	Up	48.6946	17.2223	23.1222	31.7047	29.3193	326.632	648.038	161.104	170.601	275.813
MSTRG.26966	68.5053	23.5321	3.02672	7.77479	7.55709e-15	1.71039e-12	Up	0	0	0	0	0	0	0	0	314.516	370.537
MSTRG.29189	306.813	3.61793	0.469695	7.70271	1.33211e-14	2.96175e-12	Up	75.0709	37.164	78.0373	14.4936	26.7323	323.848	1073.67	408.316	670.014	360.786
MSTRG.1490	531.949	2.38439	0.31004	7.6906	1.46448e-14	3.23701e-12	Up	232.314	141.404	114.647	122.29	244.04	670.895	990.121	861.075	577.566	1365.14
MSTRG.27048	791.853	2.14817	0.280989	7.64502	2.0891e-14	4.53802e-12	Up	400.716	227.516	279.393	175.735	374.252	1429.94	811.741	1131.43	1322.87	1764.93
MSTRG.12389	299.246	3.1187	0.408014	7.64362	2.112e-14	4.56156e-12	Up	54.7814	25.3803	57.8054	35.3281	135.386	772.04	572.396	523.126	359.311	456.903
MSTRG.21179	592.151	-2.03092	0.266921	-7.60868	2.76902e-14	5.94664e-12	Down	961.718	1258.14	752.434	1148.62	637.263	286.731	317.245	205.547	199.193	154.623
MSTRG.13994	728.385	2.29531	0.302332	7.59201	3.14974e-14	6.72604e-12	Up	277.965	217.545	368.991	216.498	151.77	770.184	1342.36	863.853	1209.46	1865.22
MSTRG.19062	328.514	4.7412	0.626866	7.56334	3.9284e-14	8.2034e-12	Up	23.3328	9.97082	24.0856	30.7989	30.1816	482.525	2078.46	235.175	183.944	186.662
MSTRG.1723	1086.39	-3.13222	0.416939	-7.51242	5.80447e-14	1.20351e-11	Down	2449.95	2528.96	1702.37	2067.15	1001.17	117.847	359.018	107.403	119.135	410.934
MSTRG.4496	286.093	2.44361	0.325298	7.51191	5.82696e-14	1.20351e-11	Up	55.7959	96.9889	157.038	69.7504	64.6748	498.3	296.923	530.534	443.182	647.743
MSTRG.21644	97.922	2.89247	0.385586	7.50149	6.30956e-14	1.28909e-11	Up	23.3328	22.6609	8.67081	20.8345	40.5296	222.704	177.251	143.513	209.677	110.047
MSTRG.15673	34.8539	22.6586	3.02724	7.48489	7.16047e-14	1.45508e-11	Up	0	0	0	0	0	0	0	0	138.196	210.342
HHLG2g0563	80.3984	2.44606	0.32867	7.4423	9.89508e-14	1.97886e-11	Up	26.3762	23.5674	42.3907	15.3994	17.2466	152.181	135.478	142.587	103.886	144.872
MSTRG.11017	1797.71	3.4994	0.47044	7.43856	1.01789e-13	2.0249e-11	Up	319.558	237.487	140.66	312.518	450.137	4410.46	7430.99	2030.47	1522.07	1122.76
MSTRG.835	30.5959	22.4809	3.02738	7.42586	1.12052e-13	2.2174e-11	Up	0	0	0	0	0	0	25.9667	0	0	279.992
MSTRG.12014	4107.61	2.30554	0.311677	7.39721	1.39075e-13	2.7096e-11	Up	1348.23	996.175	1485.6	1289.93	1791.06	5646.47	13066.9	6757.13	4440.39	4254.21
HHLG31g0005	29.2338	5.46477	0.745066	7.33462	2.22351e-13	4.28786e-11	Up	0	0	3.8537	0	2.58699	66.8111	39.5145	49.072	73.3871	57.1129
MSTRG.19091	358.716	3.47789	0.474424	7.33076	2.28856e-13	4.3909e-11	Up	150.142	25.3803	42.3907	27.1755	50.8775	833.284	1065.76	514.793	407.918	469.44
MSTRG.214	22.7764	22.0684	3.0278	7.28861	3.1316e-13	5.97804e-11	Up	0	0	0	0	0	0	177.251	0	50.5132	0
MSTRG.15612	1111.44	2.41046	0.331688	7.26724	3.66893e-13	6.93373e-11	Up	320.573	267.399	469.187	203.816	498.427	1248.07	1064.63	2632.3	1729.84	2680.13
MSTRG.27384	314.563	3.10006	0.427005	7.26	3.87083e-13	7.2789e-11	Up	105.505	43.509	106.94	31.7047	41.3919	418.498	968.67	459.24	695.748	274.42
MSTRG.10939	470.162	3.83365	0.529104	7.24555	4.3068e-13	8.05863e-11	Up	114.635	52.5734	24.0856	102.361	14.6596	965.978	650.296	416.649	568.988	1791.39
MSTRG.23707	600.204	2.85384	0.394451	7.23495	4.65696e-13	8.67088e-11	Up	74.0564	167.691	146.44	106.89	233.692	1191.47	905.447	841.632	419.355	1915.37
MSTRG.10345	605.205	2.57364	0.356203	7.22523	5.00264e-13	9.26886e-11	Up	179.561	166.785	200.392	174.829	149.183	1742.66	1367.2	787.93	946.407	337.105
HHLG41g0343	22.4571	8.03855	1.11428	7.21411	5.42865e-13	9.96052e-11	Up	0	0	0	0	0	33.4056	90.3189	36.1096	43.8416	20.8949
MSTRG.174	843.468	3.59122	0.499165	7.19445	6.27131e-13	1.1451e-10	Up	165.359	85.2052	170.526	76.0914	149.183	1131.15	4041.77	1473.09	727.199	415.113
MSTRG.12970	1718.26	2.53895	0.354334	7.16543	7.7541e-13	1.40231e-10	Up	639.117	434.184	428.724	383.174	637.263	2227.04	6333.61	2225.83	1621.19	2252.48
MSTRG.7784	569.071	2.13382	0.298521	7.14797	8.80685e-13	1.58511e-10	Up	226.227	147.749	305.405	125.007	251.801	708.941	1415.75	999.033	755.792	755.004
MSTRG.16410	1842.96	2.03443	0.284644	7.14729	8.8507e-13	1.58545e-10	Up	574.191	554.74	1246.67	443.866	796.794	2511.91	3550.66	3678.55	2658.14	2414.06
MSTRG.24108	505.992	-3.45898	0.484723	-7.13599	9.60932e-13	1.71322e-10	Down	1642.43	1113.11	441.248	1112.38	328.548	155.893	64.3522	40.7391	40.0293	121.191
MSTRG.7869	591.716	2.17981	0.305751	7.12935	1.00842e-12	1.78944e-10	Up	322.602	190.352	113.684	160.335	282.845	1072.69	1252.05	903.666	609.017	1009.92
MSTRG.16503	270.435	3.39294	0.476335	7.12301	1.05592e-12	1.86498e-10	Up	60.8683	34.4446	15.4148	18.117	106.067	578.102	689.811	482.387	448.9	270.241
HHLG28g0218	17.8414	7.70843	1.08715	7.0905	1.33628e-12	2.33831e-10	Up	0	0	0	0	0	48.2525	45.1594	38.8873	23.827	22.2879
MSTRG.18106	106.227	2.33022	0.329097	7.08063	1.43502e-12	2.49951e-10	Up	28.4052	24.4738	42.3907	48.9159	31.9063	144.757	293.536	144.438	154.399	149.051
MSTRG.23602	127.909	-2.21491	0.313382	-7.06776	1.57449e-12	2.72987e-10	Down	216.082	234.767	169.563	295.307	137.111	66.8111	49.6754	41.6649	30.4985	37.6109
MSTRG.27486	118.223	-2.5118	0.35864	-7.00368	2.49323e-12	4.22586e-10	Down	198.836	131.433	136.806	319.765	218.17	38.0452	30.4826	18.5178	40.0293	50.1479
MSTRG.30254	31.0358	4.50533	0.643697	6.99916	2.5751e-12	4.34514e-10	Up	2.02894	0	5.78054	2.71755	2.58699	29.6938	75.6421	50.9238	47.6539	93.3308
MSTRG.24763	1597.01	-2.75744	0.394516	-6.98941	2.76037e-12	4.63706e-10	Down	5440.61	3109.08	1276.54	2682.22	1404.74	514.075	300.31	255.545	629.032	358
MSTRG.27385	89.4353	3.29673	0.472301	6.98014	2.94881e-12	4.93168e-10	Up	14.2026	15.4094	33.7198	9.96435	9.48564	103.001	303.697	96.2923	191.569	117.012
HHLG1g0714	56.2422	4.00918	0.574908	6.97361	3.08918e-12	5.12113e-10	Up	0	14.503	6.74397	3.6234	7.76098	115.064	141.123	92.5888	51.4663	129.549
MSTRG.29600	37.6729	6.63558	0.9628	6.89197	5.50256e-12	9.04261e-10	Up	0	0	3.8537	0	0	157.749	63.2232	42.5908	43.8416	65.4708
MSTRG.11396	279.414	3.1801	0.461746	6.88712	5.69347e-12	9.31585e-10	Up	71.013	53.4798	28.9027	88.7733	35.3556	527.994	559.977	261.1	171.554	995.993
MSTRG.4028	48.6916	3.97996	0.579005	6.8738	6.25157e-12	1.01849e-09	Up	7.1013	0	8.67081	8.15265	5.17399	60.3156	169.348	82.404	52.4193	93.3308
MSTRG.29302	322.73	4.15941	0.60758	6.84587	7.60106e-12	1.23304e-09	Up	63.9117	41.6961	0	35.3281	30.1816	432.417	1115.44	523.126	557.551	427.65
MSTRG.23969	174.697	3.08778	0.451576	6.83778	8.04291e-12	1.29914e-09	Up	60.8683	48.0412	23.1222	39.8574	12.0726	255.181	415.467	180.548	181.085	530.732
MSTRG.17650	117.214	3.39768	0.496984	6.8366	8.10951e-12	1.30432e-09	Up	20.2894	5.43863	15.4148	35.3281	25.0076	117.847	83.545	285.173	270.674	313.424
MSTRG.24747	7599.12	2.27746	0.334776	6.80293	1.02509e-11	1.64176e-09	Up	3547.6	2230.74	3491.45	1393.2	2330.88	6418.51	14326.8	14005	8384.23	19862.7
MSTRG.7261	1990.31	3.08829	0.454961	6.78804	1.13668e-11	1.80518e-09	Up	427.092	237.487	703.299	273.567	452.724	3599.45	7829.52	3265.61	2125.37	989.028
MSTRG.24088	192.46	-2.9818	0.440568	-6.76808	1.305e-11	2.04668e-09	Down	614.769	379.797	138.733	392.233	182.814	28.7659	25.9667	37.0355	74.3402	50.1479
MSTRG.27391	16.897	7.62897	1.13456	6.72419	1.76576e-11	2.73527e-09	Up	0	0	0	0	0	24.1262	59.8363	28.7025	40.9824	15.323
MSTRG.12221	423.183	2.22282	0.331514	6.70505	2.01339e-11	3.10613e-09	Up	122.751	112.398	185.941	169.394	156.082	607.796	1373.98	537.941	551.833	413.72
MSTRG.13475	2687.42	2.10546	0.314451	6.69566	2.14694e-11	3.29869e-09	Up	720.274	779.537	1618.55	617.79	1331.44	4030.94	4054.19	6871.01	3920.97	2929.47
MSTRG.12615	488.415	2.35049	0.351208	6.69258	2.1927e-11	3.35536e-09	Up	188.692	128.714	158.002	94.2084	231.105	645.841	1542.2	778.671	670.968	445.759
MSTRG.19636	317.62	2.03252	0.307189	6.61651	3.67771e-11	5.51613e-09	Up	105.505	111.492	192.685	63.4095	150.908	618.931	655.941	502.757	383.138	391.432
MSTRG.19692	570.58	2.48068	0.375048	6.6143	3.73303e-11	5.57697e-09	Up	154.2	188.539	96.3424	172.111	255.25	918.653	1730.74	672.194	393.622	1124.15
MSTRG.24787	184.614	2.86267	0.438648	6.52613	6.74923e-11	9.81368e-09	Up	52.7525	96.0824	15.4148	20.8345	37.9426	376.741	282.247	225.917	304.985	433.222
MSTRG.18929	18328.7	2.43808	0.373579	6.52627	6.74291e-11	9.81368e-09	Up	8935.46	5690.62	6999.27	3189.5	3738.21	23274.4	32512.5	21194.5	16940	60812.7
MSTRG.13397	224.37	3.31179	0.508389	6.51428	7.30377e-11	1.0577e-08	Up	34.492	65.2635	40.4638	25.3638	39.6672	512.219	956.251	283.322	151.54	135.121
MSTRG.18603	564.347	2.53353	0.389071	6.51173	7.42906e-11	1.07174e-08	Up	232.314	136.872	162.819	72.468	226.793	740.49	1950.89	856.446	670.968	593.417
MSTRG.16767	36.498	6.55854	1.01198	6.48088	9.11892e-11	1.30556e-08	Up	4.05788	0	0	0	0	92.7933	27.0957	33.332	60.044	147.658
MSTRG.10743	151.026	5.16284	0.796745	6.47991	9.17749e-11	1.30899e-08	Up	0	9.06438	11.5611	9.0585	11.2103	283.947	929.156	138.883	86.7302	30.6459
MSTRG.15461	1723.79	5.94015	0.918163	6.4696	9.82615e-11	1.39624e-08	Up	69.9985	26.2867	33.7198	82.4323	63.8125	2154.66	12759.8	1190.69	428.885	427.65
MSTRG.7936	6726.68	2.20561	0.341046	6.4672	9.98378e-11	1.41332e-08	Up	3502.97	1709.54	2835.36	1279.06	2657.7	7342.73	11033.6	10490.3	6678.22	19737.4
MSTRG.12662	84.3786	3.02955	0.468572	6.46549	1.00973e-10	1.42405e-08	Up	36.521	21.7545	15.4148	13.5877	5.17399	173.523	244.99	115.736	100.073	117.012
MSTRG.18070	100.127	-2.17685	0.337829	-6.44365	1.16636e-10	1.63277e-08	Down	77.0998	230.235	156.075	211.063	145.734	37.1173	36.1276	33.332	43.8416	30.6459
MSTRG.28877	35.4582	4.38436	0.684443	6.40573	1.4965e-10	2.07191e-08	Up	8.11577	0.906438	4.81712	0.90585	1.72466	28.7659	128.704	42.5908	78.1525	59.8989
MSTRG.8355	842.196	3.14755	0.494529	6.36474	1.95617e-10	2.68863e-08	Up	454.483	99.7082	87.6716	64.3153	148.321	2058.15	2477	1027.74	853.959	1150.62
MSTRG.13305	212.731	2.89729	0.455307	6.36339	1.97347e-10	2.69418e-08	Up	18.2605	35.3511	82.8545	63.4095	51.7399	432.417	741.744	274.989	174.413	252.132
MSTRG.19527	101.828	2.99375	0.47149	6.34955	2.15947e-10	2.91733e-08	Up	30.4341	20.8481	12.5245	28.0813	21.5583	243.118	121.931	100.922	75.2932	363.572
MSTRG.21127	160.672	2.24142	0.353012	6.34943	2.16115e-10	2.91733e-08	Up	23.3328	59.8249	45.2809	87.8674	63.8125	317.353	373.694	242.583	204.912	188.055
MSTRG.17218	250.87	2.24465	0.355294	6.31771	2.65461e-10	3.54545e-08	Up	104.491	52.5734	67.4397	62.5036	150.046	451.903	625.458	451.833	258.284	284.171
MSTRG.18078	1195.66	2.21623	0.351059	6.31298	2.73709e-10	3.64274e-08	Up	500.134	155.001	626.226	321.577	514.812	1426.23	2664.41	2337.87	2169.21	1241.16
MSTRG.2611	422.957	2.97915	0.472124	6.31011	2.78831e-10	3.69789e-08	Up	100.433	87.018	203.282	21.7404	63.8125	545.624	1308.49	465.721	872.067	561.378
MSTRG.6817	469.89	3.09155	0.491281	6.29284	3.11703e-10	4.11938e-08	Up	121.737	76.1408	94.4155	75.1855	125.9	703.373	2343.78	431.464	407.918	318.996
MSTRG.14616	131.5	2.27313	0.362727	6.26679	3.68569e-10	4.78722e-08	Up	45.6512	16.3159	32.7564	59.7861	70.7112	221.776	289.02	206.473	185.85	186.662
MSTRG.25821	101.162	3.54323	0.566743	6.25191	4.05474e-10	5.24853e-08	Up	19.2749	20.8481	16.3782	23.5521	0	186.514	229.184	88.8852	227.786	199.199
MSTRG.1463	62.3719	3.94174	0.630542	6.25136	4.0689e-10	5.24888e-08	Up	4.05788	8.15794	3.8537	6.34095	15.522	162.388	188.541	103.699	117.229	13.93
MSTRG.4911	1122.18	5.97162	0.959525	6.22352	4.86127e-10	6.22853e-08	Up	0	68.8893	62.6226	28.0813	16.3843	707.085	1892.18	826.818	3319.57	4300.18
MSTRG.24155	1241.31	2.13816	0.343632	6.22224	4.90105e-10	6.25828e-08	Up	591.437	681.641	243.746	275.378	505.326	1926.39	1429.3	1370.31	1961.44	3428.16
MSTRG.9909	220.823	6.10304	0.982838	6.20961	5.3117e-10	6.75981e-08	Up	1.01447	0	20.2319	1.8117	8.62331	103.001	582.557	549.051	699.56	242.381
MSTRG.18488	310.801	2.00751	0.324671	6.18322	6.28072e-10	7.91308e-08	Up	100.433	133.246	135.843	148.559	100.893	705.229	783.516	349.985	263.05	387.253
MSTRG.29655	14.6851	-7.24588	1.1723	-6.18093	6.37241e-10	8.00193e-08	Down	33.4775	50.7605	13.4879	35.3281	13.7973	0	0	0	0	0
MSTRG.8207	100.473	3.072	0.499715	6.14751	7.87104e-10	9.75415e-08	Up	21.3039	27.1931	26.0124	9.0585	23.2829	251.47	352.244	106.477	130.572	57.1129
MSTRG.11751	298.575	3.00288	0.488564	6.14634	7.92926e-10	9.79419e-08	Up	106.519	32.6318	88.635	78.8089	25.0076	391.588	768.84	765.709	595.674	132.335
MSTRG.10648	23.8664	5.99036	0.976059	6.13729	8.39398e-10	1.03344e-07	Up	0	3.62575	0	0	0	49.1804	50.8044	22.2213	36.217	76.6148
MSTRG.21776	1830.85	2.51787	0.412292	6.107	1.01523e-09	1.24184e-07	Up	793.316	267.399	359.357	507.276	794.207	2061.87	6432.96	3548.93	1845.16	1698.06
MSTRG.25163	29.5026	5.26708	0.864696	6.09125	1.12031e-09	1.36595e-07	Up	4.05788	0	0	0	3.44932	79.8022	75.6421	21.2954	28.5924	82.1868
MSTRG.1917	261.735	2.04978	0.336736	6.08721	1.14897e-09	1.39638e-07	Up	96.3747	109.679	95.379	62.5036	144.872	446.336	712.39	278.692	242.082	429.043
MSTRG.3551	10.8196	6.9836	1.14872	6.07946	1.20589e-09	1.4562e-07	Up	0	0	0	0	0	17.6307	33.8696	16.666	21.9208	18.109
MSTRG.14198	3708.72	4.88328	0.803682	6.07613	1.23115e-09	1.48197e-07	Up	314.486	36.2575	725.458	48.9159	90.5448	5334.68	5703.64	8084.85	5814.73	10933.6
MSTRG.5805	637.294	2.34982	0.386896	6.0735	1.25151e-09	1.50169e-07	Up	202.894	199.416	239.893	166.676	236.279	682.03	2420.55	1044.4	689.076	491.728
MSTRG.2599	779.612	2.66243	0.438481	6.07193	1.26381e-09	1.51165e-07	Up	337.819	195.791	317.93	75.1855	137.111	872.257	2742.31	892.556	1417.23	807.938
MSTRG.14427	117.275	4.96375	0.81783	6.06941	1.28379e-09	1.5307e-07	Up	0	0	3.8537	28.9872	3.44932	344.263	208.862	125.921	237.317	220.093
MSTRG.507	23.0647	5.91946	0.975634	6.06729	1.30085e-09	1.54617e-07	Up	0	0	3.8537	0	0	31.5497	36.1276	74.071	57.1847	27.8599
MSTRG.682	217.195	3.85039	0.635916	6.05487	1.40529e-09	1.65986e-07	Up	41.5933	20.8481	3.8537	43.4808	31.0439	400.867	1069.15	233.324	252.566	75.2218
MSTRG.13976	35.0842	3.17154	0.52403	6.05221	1.42875e-09	1.68232e-07	Up	2.02894	10.8773	7.70739	7.2468	6.89865	58.4598	47.4174	37.0355	53.3724	119.798
MSTRG.2514	797.236	2.68304	0.446004	6.01573	1.79072e-09	2.09989e-07	Up	226.227	256.522	237.002	143.124	211.271	1040.21	3664.69	857.372	709.091	626.848
MSTRG.26707	10.7533	6.97835	1.16008	6.01539	1.79449e-09	2.09989e-07	Up	0	0	0	0	0	32.4776	12.4188	24.0731	19.0616	19.502
HHUNg1073	49.3991	-2.25258	0.376205	-5.98765	2.12899e-09	2.47598e-07	Down	67.9696	83.3923	64.5494	76.9972	115.552	27.838	16.9348	10.1848	15.2493	15.323
MSTRG.18158	91.682	2.38727	0.399549	5.97493	2.30189e-09	2.66069e-07	Up	10.1447	38.9768	52.9883	22.6462	22.4206	159.604	154.671	151.846	193.475	110.047
HHLG9g0657	19.0505	7.80206	1.30864	5.96195	2.49242e-09	2.8634e-07	Up	0	0	0	0	0	61.2436	79.029	37.0355	7.62463	5.57199
HHLG37g0761	11.8024	7.11335	1.19857	5.93486	2.941e-09	3.36852e-07	Up	0	0	0	0	0	27.838	9.03189	42.5908	19.0616	19.502
MSTRG.4046	210.948	3.15821	0.532508	5.93083	3.01413e-09	3.44184e-07	Up	36.521	52.5734	97.3058	9.0585	17.2466	174.451	564.493	312.95	535.63	309.245
MSTRG.19204	593.748	2.44221	0.413197	5.91052	3.41024e-09	3.85918e-07	Up	184.634	123.276	122.355	195.664	296.642	640.274	2129.27	1109.21	704.325	431.829
MSTRG.16096	518.451	5.96193	1.0121	5.89067	3.84629e-09	4.33965e-07	Up	36.521	3.62575	21.1953	17.2111	3.44932	624.499	3831.78	275.914	226.833	143.479
MSTRG.14808	992.704	4.88936	0.8346	5.85833	4.67538e-09	5.22827e-07	Up	46.6657	36.2575	78.0373	90.585	72.4358	1225.8	6969.23	623.122	514.663	270.241
MSTRG.29103	113.857	-2.87786	0.494406	-5.82085	5.85502e-09	6.50888e-07	Down	376.369	201.229	128.135	209.251	86.2331	8.35139	31.6116	16.666	33.3578	47.3619
MSTRG.23478	3601.11	4.20151	0.724146	5.80202	6.5522e-09	7.24133e-07	Up	362.166	156.814	342.979	487.347	507.051	4650.8	22227.5	3445.23	2159.68	1671.6
MSTRG.11032	943.553	2.11975	0.370873	5.71556	1.09344e-08	1.18761e-06	Up	500.134	216.639	343.942	328.823	375.976	2110.12	1340.11	1995.29	1789.88	434.615
MSTRG.12783	305.728	2.12511	0.373152	5.69502	1.23359e-08	1.32085e-06	Up	213.039	120.556	58.7689	113.231	64.6748	462.11	403.048	335.171	489.883	796.794
HHLG28g0130	75.5253	2.07795	0.365314	5.68813	1.28439e-08	1.37136e-06	Up	31.4486	18.1288	42.3907	27.1755	25.8699	125.271	173.864	128.698	123.9	58.5059
MSTRG.24733	791.448	2.03235	0.358866	5.66326	1.48524e-08	1.57248e-06	Up	222.169	306.376	380.552	391.327	254.388	1347.36	2316.68	1045.33	1198.97	451.331
MSTRG.17846	139.095	2.19877	0.388654	5.6574	1.53681e-08	1.62254e-06	Up	43.6223	43.509	78.0373	20.8345	62.9502	300.65	293.536	269.433	136.29	142.086
HHLG4g0334	11.1638	7.03315	1.24513	5.64851	1.61843e-08	1.70395e-06	Up	0	0	0	0	0	37.1173	6.77392	14.8142	36.217	16.716
MSTRG.23300	153.293	2.10375	0.373174	5.63746	1.72575e-08	1.81189e-06	Up	18.2605	47.1348	86.7081	87.8674	49.1529	190.226	235.958	256.471	299.267	261.883
MSTRG.24258	296.215	2.70345	0.479662	5.63616	1.73884e-08	1.82058e-06	Up	81.1577	49.8541	186.904	32.6106	43.9789	253.326	879.48	344.43	640.469	449.938
HHLG32g0686	11.1329	7.02623	1.24855	5.6275	1.82845e-08	1.90386e-06	Up	0	0	0	0	0	11.1352	47.4174	27.7766	15.2493	9.75098
MSTRG.26217	4112.99	2.21096	0.394167	5.60919	2.03281e-08	2.09929e-06	Up	795.345	2121.06	1140.69	2324.41	923.557	4480.99	6049.11	4803.5	4498.53	13992.7
MSTRG.7465	78.117	3.18902	0.57097	5.58527	2.33343e-08	2.39015e-06	Up	12.1737	16.3159	8.67081	3.6234	36.2179	181.875	240.474	139.809	87.6833	54.3269
HHUNg1612	13.4813	-7.12324	1.27699	-5.57816	2.43069e-08	2.47636e-06	Down	14.2026	54.3863	9.63424	47.1042	9.48564	0	0	0	0	0
MSTRG.6712	119.547	3.37115	0.604732	5.57461	2.48078e-08	2.5206e-06	Up	53.767	12.6901	2.89027	19.9287	16.3843	377.669	296.923	193.511	153.446	68.2568
MSTRG.28055	78.5921	3.21327	0.576949	5.56941	2.55598e-08	2.59004e-06	Up	8.11577	36.2575	3.8537	9.0585	18.9713	39.9011	171.606	185.178	163.93	149.051
HHLG21g0418	37.0849	5.58331	1.00269	5.56833	2.57193e-08	2.59923e-06	Up	4.05788	0	0	3.6234	0	48.2525	226.926	37.0355	31.4516	19.502
MSTRG.15558	46.5807	5.23492	0.946233	5.53238	3.15919e-08	3.15103e-06	Up	0	0	3.8537	8.15265	0	51.9642	55.3203	31.4802	62.9032	252.132
MSTRG.27774	42.204	-3.46558	0.6267	-5.52988	3.20452e-08	3.18443e-06	Down	129.852	75.2343	29.8661	115.949	36.2179	15.7749	5.64493	4.62944	1.90616	6.96498
MSTRG.13350	33.5655	6.49829	1.17667	5.52262	3.33979e-08	3.29593e-06	Up	0	0	0	3.6234	0	66.8111	181.767	41.6649	36.217	5.57199
MSTRG.15277	626.098	4.29857	0.780292	5.50893	3.61024e-08	3.55354e-06	Up	92.3169	45.3219	39.5004	67.0329	58.6385	857.41	4142.25	279.618	291.642	387.253
HHLG25g0360	8.81921	6.68433	1.22422	5.46009	4.75902e-08	4.57702e-06	Up	0	0	0	0	0	14.8469	23.7087	7.4071	17.1554	25.0739
MSTRG.20932	2463.75	-2.48574	0.455722	-5.45452	4.91059e-08	4.71081e-06	Down	5911.32	4291.98	2465.4	6600.93	1635.84	1575.63	486.593	268.507	615.689	785.65
MSTRG.15344	754.852	2.80963	0.516153	5.4434	5.22734e-08	5.00197e-06	Up	253.618	63.4507	129.099	76.0914	419.955	1336.22	2139.43	1899.92	517.522	713.214
MSTRG.9894	136.315	5.81277	1.06986	5.43319	5.53559e-08	5.28039e-06	Up	1.01447	0	20.2319	1.8117	0.862331	77.0184	361.276	342.578	426.026	132.335
MSTRG.5053	192.799	3.1167	0.574148	5.42839	5.68642e-08	5.3867e-06	Up	55.7959	19.9416	36.6101	34.4223	52.6022	417.57	851.256	290.729	92.4487	76.6148
MSTRG.27371	19.4562	7.83318	1.44454	5.42262	5.8731e-08	5.5358e-06	Up	0	0	0	0	0	26.91	38.3855	44.4426	84.824	0
MSTRG.11932	21.7323	7.9881	1.47361	5.42077	5.93436e-08	5.57963e-06	Up	0	0	0	0	0	30.6218	44.0305	0	40.9824	101.689
HHLG12g0857	57.3116	2.82147	0.522373	5.40125	6.61782e-08	6.16919e-06	Up	10.1447	9.06438	26.9759	19.0228	6.03632	140.118	135.478	88.8852	106.745	30.6459
MSTRG.28259	18.7692	6.60844	1.22356	5.40101	6.62669e-08	6.16919e-06	Up	2.02894	0	0	0	0	77.0184	7.9029	22.2213	20.0147	58.5059
MSTRG.21713	672.347	-2.39931	0.44445	-5.39838	6.72454e-08	6.23101e-06	Down	2153.72	1091.35	497.127	1279.97	630.364	441.696	211.12	101.848	147.727	168.553
MSTRG.25480	161.775	2.60618	0.483138	5.39428	6.88002e-08	6.35805e-06	Up	37.5354	18.1288	61.6591	46.1983	64.6748	182.803	606.266	273.137	235.41	91.9378
HHLG28g0733	39.1102	2.18379	0.405573	5.38446	7.26627e-08	6.6661e-06	Up	22.3184	17.2223	15.4148	7.2468	8.62331	67.7391	77.9	64.8121	45.7478	64.0778
MSTRG.4130	233.944	-2.07966	0.387359	-5.36881	7.92586e-08	7.21864e-06	Down	733.463	427.839	245.673	331.541	153.495	124.343	84.674	74.9969	71.4809	91.9378
MSTRG.28764	101.837	2.57923	0.481928	5.3519	8.7036e-08	7.83262e-06	Up	5.07235	18.1288	34.6833	50.7276	37.0802	115.064	255.151	133.328	217.302	151.837
MSTRG.19041	37.0365	6.9899	1.3075	5.34599	8.9923e-08	8.07321e-06	Up	3.04341	0	0	0	0	11.1352	20.3218	126.847	202.053	6.96498
MSTRG.27154	473.766	-2.12554	0.39788	-5.34216	9.18458e-08	8.22629e-06	Down	1144.32	902.812	222.551	726.492	858.882	260.749	139.994	111.107	243.988	126.763
MSTRG.20737	93.6936	-2.41549	0.45247	-5.33844	9.37499e-08	8.35723e-06	Down	159.272	77.0472	297.698	125.007	131.074	39.9011	15.8058	32.4061	44.7947	13.93
MSTRG.4034	296.679	3.28453	0.618462	5.31081	1.09137e-07	9.63801e-06	Up	73.0419	19.9416	150.294	8.15265	25.0076	253.326	877.222	380.54	810.117	369.144
MSTRG.3465	233.076	2.13044	0.403532	5.27947	1.29557e-07	1.13616e-05	Up	83.1866	72.515	80.9276	78.8089	118.139	741.418	348.857	299.062	393.622	114.226
MSTRG.17656	46.2987	-3.2127	0.61253	-5.24496	1.56318e-07	1.35513e-05	Down	156.229	52.5734	26.0124	147.654	35.3556	3.71173	10.1609	12.9624	8.57771	9.75098
MSTRG.2675	943.741	2.36591	0.451536	5.2397	1.60836e-07	1.3911e-05	Up	185.648	99.7082	483.639	256.355	507.913	1588.62	3035.84	1216.62	1361	702.07
MSTRG.3785	244.66	-2.91721	0.55686	-5.23868	1.61727e-07	1.392e-05	Down	164.344	180.381	230.258	452.925	1133.1	70.5229	88.0609	41.6649	68.6217	16.716
HHLG1g0262	85.725	2.12191	0.405138	5.2375	1.62769e-07	1.39505e-05	Up	26.3762	21.7545	24.0856	53.4451	34.4932	82.586	99.3508	162.956	244.941	107.261
MSTRG.3424	9.42896	6.79095	1.30066	5.22117	1.77799e-07	1.51017e-05	Up	0	0	0	0	0	46.3966	14.6768	14.8142	11.4369	6.96498
MSTRG.25190	97.1065	3.68942	0.707082	5.21781	1.81052e-07	1.53436e-05	Up	8.11577	0	3.8537	34.4223	23.2829	284.875	153.542	85.1817	156.305	221.486
MSTRG.22999	173.244	2.24965	0.432505	5.20143	1.97763e-07	1.66108e-05	Up	66.9551	96.0824	35.6467	39.8574	62.0878	322.921	276.602	116.662	166.789	548.841
MSTRG.29449	212.074	2.54317	0.491899	5.1701	2.33965e-07	1.95214e-05	Up	27.3907	60.7313	133.916	33.5164	55.1892	596.661	112.899	414.798	446.041	239.595
MSTRG.19762	917.829	2.55266	0.49469	5.16012	2.46797e-07	2.04565e-05	Up	406.803	114.211	210.026	202.004	403.571	1044.85	4038.38	1093.47	1137.02	527.946
MSTRG.27756	96.7822	2.23913	0.437169	5.1219	3.02475e-07	2.45863e-05	Up	29.4197	48.9476	62.6226	17.2111	11.2103	214.352	135.478	158.327	128.666	161.588
MSTRG.30113	29.7404	2.30065	0.449915	5.11352	3.16211e-07	2.55381e-05	Up	10.1447	9.06438	11.5611	9.0585	10.348	41.757	72.2551	64.8121	23.827	44.5759
MSTRG.4041	52.5787	2.40038	0.469459	5.11306	3.16974e-07	2.55451e-05	Up	23.3328	15.4094	25.049	9.96435	10.348	121.559	116.286	49.072	114.369	40.3969
MSTRG.4038	49.6153	3.21227	0.629775	5.10066	3.38473e-07	2.71044e-05	Up	27.3907	4.53219	8.67081	7.2468	0.862331	58.4598	146.768	85.1817	76.2463	80.7938
HHLG32g0892	45.9625	3.52675	0.693588	5.0848	3.68022e-07	2.92845e-05	Up	11.1592	0	9.63424	8.15265	7.76098	54.748	42.9015	75.9228	36.217	213.128
MSTRG.9910	90.7305	6.70734	1.32254	5.07155	3.94594e-07	3.12018e-05	Up	0	0	8.67081	0	0	59.3877	230.313	267.582	220.161	121.191
HHLG31g0383	36.8843	-3.78455	0.748518	-5.05605	4.28021e-07	3.37743e-05	Down	48.6946	47.1348	54.9152	51.6334	141.422	8.35139	0	8.33299	0	8.35798
HHLG14g0032	36.5956	-2.81489	0.559492	-5.03116	4.87528e-07	3.83898e-05	Down	123.765	52.5734	27.9393	54.351	61.2255	4.63966	18.0638	4.62944	7.62463	11.144
MSTRG.28861	161.382	-2.94668	0.587415	-5.01636	5.26604e-07	4.12947e-05	Down	442.309	137.779	93.4521	126.819	628.639	24.1262	38.3855	24.0731	82.9179	15.323
MSTRG.11540	487.027	-2.57382	0.513506	-5.01225	5.37975e-07	4.2099e-05	Down	1544.02	1064.16	257.234	1090.64	213.858	210.641	106.125	57.405	171.554	154.623
MSTRG.2368	50.0686	-2.18813	0.436613	-5.0116	5.39787e-07	4.21536e-05	Down	89.2734	83.3923	40.4638	67.0329	131.074	22.2704	22.5797	16.666	20.9677	6.96498
MSTRG.16212	159.477	2.13182	0.425851	5.00603	5.55655e-07	4.33033e-05	Up	30.4341	31.7253	58.7689	72.468	102.617	350.759	435.789	186.103	168.695	157.409
MSTRG.12538	63.2889	-3.68258	0.737507	-4.99328	5.93612e-07	4.60714e-05	Down	91.3024	97.8953	134.879	54.351	209.546	16.7028	0	12.9624	15.2493	0
MSTRG.2598	105.602	4.21756	0.846296	4.98355	6.24286e-07	4.82539e-05	Up	19.2749	19.9416	0	0	14.6596	138.262	494.496	74.071	199.193	96.1168
MSTRG.21887	60.5967	3.44295	0.691204	4.98109	6.3227e-07	4.87712e-05	Up	19.2749	0	8.67081	18.117	5.17399	248.686	83.545	85.1817	85.7771	51.5409
MSTRG.22286	396.206	-2.71635	0.545696	-4.97778	6.43187e-07	4.95123e-05	Down	1309.68	905.531	205.209	710.186	308.715	219.92	104.996	26.8507	112.463	58.5059
MSTRG.15243	62.1123	2.6799	0.538873	4.97315	6.58738e-07	5.05037e-05	Up	25.3618	7.2515	8.67081	6.34095	36.2179	174.451	56.4493	107.403	100.073	98.9028
MSTRG.2882	35.6172	4.41836	0.888398	4.9734	6.57896e-07	5.05037e-05	Up	0	0	12.5245	0	3.44932	82.586	59.8363	90.737	63.8563	43.1829
MSTRG.28054	46.1456	3.08625	0.621745	4.96385	6.9111e-07	5.27714e-05	Up	17.246	8.15794	14.4514	8.15265	0.862331	40.829	162.574	51.8497	105.792	51.5409
MSTRG.2344	240.771	-2.55524	0.515741	-4.9545	7.25155e-07	5.48174e-05	Down	345.935	534.798	378.626	523.581	274.221	27.838	207.733	41.6649	34.3108	39.0039
MSTRG.21394	27.7431	3.80995	0.769049	4.9541	7.2666e-07	5.48215e-05	Up	0	3.62575	9.63424	0	5.17399	42.6849	22.5797	53.7015	82.9179	57.1129
MSTRG.6516	514.466	-2.45208	0.495557	-4.94812	7.49353e-07	5.6197e-05	Down	1602.86	828.484	384.406	1118.72	415.644	269.1	130.962	36.1096	231.598	126.763
MSTRG.1644	1030.79	-2.41858	0.490199	-4.93388	8.06124e-07	5.96263e-05	Down	3079.93	2134.66	674.397	2227.48	567.414	487.165	313.858	92.5888	451.759	278.599
MSTRG.10608	42.8218	-2.37782	0.484516	-4.90761	9.21928e-07	6.76624e-05	Down	30.4341	47.1348	98.2692	71.5621	112.103	11.1352	7.9029	18.5178	20.0147	11.144
MSTRG.5750	377.933	2.10877	0.430284	4.90086	9.5416e-07	6.9757e-05	Up	103.476	290.06	94.4155	138.595	84.5085	891.743	380.468	591.642	251.613	952.81
MSTRG.21034	90.7883	-2.43172	0.496418	-4.89855	9.65486e-07	7.04488e-05	Down	189.706	212.106	42.3907	250.015	71.5735	34.3335	14.6768	25.9249	29.5454	37.6109
HHLG1g0346	6.66087	6.28852	1.29895	4.84125	1.29024e-06	9.16679e-05	Up	0	0	0	0	0	9.27933	13.5478	12.0365	24.7801	6.96498
MSTRG.15074	677.754	3.86778	0.800686	4.83058	1.36135e-06	9.59984e-05	Up	143.04	29.006	70.3299	50.7276	141.422	1197.96	3612.76	977.737	150.586	403.969
MSTRG.17881	533.28	4.44519	0.920168	4.83084	1.35959e-06	9.59984e-05	Up	68.984	29.9125	20.2319	58.8802	56.0515	510.363	3995.48	182.4	163.93	246.56
MSTRG.13815	55.4232	4.05834	0.840437	4.82885	1.37326e-06	9.64777e-05	Up	7.1013	0	9.63424	0	14.6596	209.713	101.609	97.2182	93.4017	20.8949
MSTRG.20359	216.599	2.87628	0.596387	4.82284	1.41529e-06	9.88791e-05	Up	82.1721	36.2575	36.6101	81.5265	23.2829	840.707	632.232	167.586	200.147	65.4708
MSTRG.28222	33.6267	2.68425	0.55653	4.82319	1.4128e-06	9.88791e-05	Up	7.1013	9.06438	8.67081	12.6819	7.76098	64.9553	121.931	42.5908	44.7947	16.716
MSTRG.11468	518.537	3.82585	0.797386	4.79798	1.6027e-06	0.000110543	Up	52.7525	16.3159	42.3907	121.384	108.654	1238.79	2628.28	502.757	325	149.051
MSTRG.2350	1789.14	2.02428	0.422408	4.79225	1.64924e-06	0.000113339	Up	624.914	447.78	703.299	463.795	1290.05	2981.45	3724.53	2064.73	792.009	4798.87
MSTRG.9900	127.69	5.7703	1.20631	4.78344	1.72317e-06	0.000117777	Up	1.01447	0	20.2319	1.8117	0	78.8743	328.535	313.876	415.542	117.012
HHLG31g0090	55.5534	2.15534	0.451893	4.76958	1.84608e-06	0.000125723	Up	8.11577	16.3159	15.4148	44.3866	17.2466	74.2346	107.254	87.9593	64.8094	119.798
MSTRG.28333	23.873	2.78366	0.588055	4.73368	2.20485e-06	0.000146978	Up	5.07235	4.53219	5.78054	5.4351	9.48564	76.0905	45.1594	39.8132	36.217	11.144
MSTRG.21035	401.904	-2.01583	0.425897	-4.73314	2.21077e-06	0.000147113	Down	847.083	941.789	316.003	845.158	272.497	259.821	77.9	95.3664	193.475	169.946
MSTRG.21851	15.3995	3.81542	0.806213	4.73252	2.21752e-06	0.000147303	Up	4.05788	2.71931	0	0	3.44932	41.757	37.2565	26.8507	11.4369	26.4669
MSTRG.7090	64.0421	-3.63851	0.771204	-4.71796	2.38225e-06	0.000157691	Down	282.023	135.966	13.4879	136.783	25.0076	9.27933	9.03189	6.48121	20.9677	1.393
HHLG20g0305	43.8012	3.61129	0.766016	4.71438	2.42442e-06	0.000159923	Up	9.13024	9.06438	0	4.52925	10.348	59.3877	237.087	46.2944	34.3108	27.8599
MSTRG.21712	360.893	-2.92031	0.619659	-4.71277	2.44372e-06	0.000160635	Down	855.199	834.829	199.429	1093.36	205.235	219.92	54.1913	12.9624	57.1847	76.6148
MSTRG.12506	880.895	2.0863	0.443475	4.70444	2.54569e-06	0.00016647	Up	439.266	425.119	163.782	336.07	314.751	2547.18	2302	480.536	617.595	1182.65
MSTRG.23769	74.0201	3.79972	0.808351	4.70058	2.59423e-06	0.000168768	Up	6.08683	3.62575	36.6101	0	3.44932	62.1715	102.738	212.028	238.27	75.2218
MSTRG.932	7.77486	6.50676	1.38594	4.69484	2.66822e-06	0.000172394	Up	0	0	0	0	0	3.71173	9.03189	8.33299	37.1701	19.502
MSTRG.6251	221.099	-2.0514	0.438698	-4.6761	2.9238e-06	0.000187306	Down	588.393	381.61	177.27	486.441	148.321	111.352	98.2218	56.4791	123.9	39.0039
MSTRG.2081	265.222	-2.04149	0.437126	-4.67025	3.00835e-06	0.000191748	Down	576.22	472.254	208.1	707.469	170.742	182.803	59.8363	109.255	100.073	65.4708
MSTRG.12099	680.902	-2.52866	0.544413	-4.64476	3.40476e-06	0.000213062	Down	2497.63	1156.61	315.04	1454.79	379.426	332.2	273.215	56.4791	200.147	143.479
MSTRG.11989	178.718	2.19234	0.472877	4.63619	3.54895e-06	0.000220262	Up	33.4775	82.4858	77.0739	37.1398	90.5448	341.479	614.168	236.101	174.413	100.296
HHLG6g0043	14.2162	3.68692	0.795584	4.63423	3.58269e-06	0.000221992	Up	4.05788	3.62575	0	0	2.58699	40.829	29.3536	15.7401	18.1085	27.8599
HHLG33g0412	19.3778	3.47812	0.75158	4.62774	3.69669e-06	0.000228307	Up	8.11577	0	0	4.52925	3.44932	38.0452	34.9986	34.2578	46.7009	23.6809
MSTRG.6790	82.0521	2.18972	0.473687	4.62272	3.78735e-06	0.000232011	Up	18.2605	18.1288	35.6467	23.5521	51.7399	128.055	277.731	121.291	66.7155	79.4008
MSTRG.21516	462.108	2.29163	0.497504	4.60625	4.10003e-06	0.000248746	Up	56.8104	118.743	247.6	257.261	103.48	1844.73	403.048	583.309	648.094	358
HHLG32g0216	15.805	4.12958	0.899235	4.59233	4.38332e-06	0.000264236	Up	5.07235	0	0	3.6234	0	43.6128	38.3855	23.1472	21.9208	22.2879
MSTRG.6716	11.9754	-6.35964	1.38918	-4.57798	4.69494e-06	0.000280339	Down	56.8104	25.3803	4.81712	29.893	1.72466	0	1.12899	0	0	0
HHLG10g1101	18.1288	-3.16233	0.69199	-4.5699	4.87954e-06	0.000287277	Down	32.4631	25.3803	27.9393	57.0685	19.8336	5.5676	2.25797	0	3.81232	6.96498
MSTRG.22703	535.997	-2.57488	0.563602	-4.56861	4.90969e-06	0.000288602	Down	1033.75	1392.29	351.65	1363.3	448.412	342.407	133.22	27.7766	60.997	206.163
MSTRG.24059	129.864	2.74764	0.604234	4.5473	5.43372e-06	0.00031553	Up	26.3762	39.8833	28.9027	48.9159	24.1453	71.4508	724.809	135.18	118.182	80.7938
MSTRG.5456	301.381	2.78035	0.611432	4.54727	5.43456e-06	0.00031553	Up	151.156	145.937	21.1953	56.1627	8.62331	492.732	906.576	236.101	372.654	622.669
MSTRG.6330	23.3394	-2.10828	0.463813	-4.54554	5.47953e-06	0.000316708	Down	30.4341	48.9476	35.6467	48.9159	25.8699	10.2073	6.77392	12.9624	6.67155	6.96498
MSTRG.20286	11.8392	-5.75696	1.26651	-4.54552	5.47999e-06	0.000316708	Down	42.6078	15.4094	13.4879	39.8574	5.17399	1.85587	0	0	0	0
MSTRG.3612	114.701	2.31441	0.509992	4.53813	5.67551e-06	0.000327507	Up	49.7091	15.4094	13.4879	24.4579	88.8201	209.713	260.796	241.657	113.416	129.549
MSTRG.8470	35.125	4.63749	1.02457	4.52626	6.00373e-06	0.000342784	Up	5.07235	0	8.67081	0	0	60.3156	189.67	37.9614	31.4516	18.109
MSTRG.4466	49.5513	2.87236	0.634805	4.52479	6.04541e-06	0.000344643	Up	18.2605	7.2515	11.5611	2.71755	19.8336	108.568	179.509	62.0345	67.6686	18.109
MSTRG.29702	12.1156	-6.96882	1.54783	-4.50233	6.72123e-06	0.000381445	Down	0	19.9416	53.9517	14.4936	32.7686	0	0	0	0	0
MSTRG.29328	17.6646	4.95699	1.1017	4.49941	6.81426e-06	0.000386145	Up	0	0	0	5.4351	0	22.2704	33.8696	11.1107	34.3108	69.6498
MSTRG.29725	10.4371	6.93112	1.54227	4.49411	6.98619e-06	0.000394115	Up	0	0	0	0	0	26.91	33.8696	18.5178	0	25.0739
MSTRG.20853	43.9609	-2.98714	0.66712	-4.47766	7.54663e-06	0.000422578	Down	154.2	81.5794	38.537	103.267	12.935	7.42346	2.25797	11.1107	17.1554	11.144
MSTRG.26365	67.0773	-2.06783	0.462629	-4.46973	7.83193e-06	0.000435328	Down	193.764	77.9537	108.867	105.079	56.9139	31.5497	13.5478	46.2944	22.8739	13.93
HHLG6g0570	6.92805	-6.16151	1.39094	-4.42976	9.43372e-06	0.000510109	Down	18.2605	9.06438	7.70739	30.7989	3.44932	0	0	0	0	0
MSTRG.12072	44.5729	-2.13814	0.483024	-4.42658	9.57386e-06	0.00051621	Down	101.447	67.0764	53.9517	92.3967	48.2905	11.1352	20.3218	29.6284	4.76539	16.716
MSTRG.17128	4004.95	-2.03242	0.462473	-4.39468	1.10937e-05	0.000591407	Down	7480.71	9221.19	2497.19	9864.7	3119.05	2823.7	1607.68	416.649	1668.84	1349.81
MSTRG.22369	9.94537	6.86405	1.56326	4.39086	1.12905e-05	0.000599362	Up	0	0	0	0	0	18.5587	50.8044	13.8883	16.2023	0
MSTRG.6264	23.0656	-2.19326	0.499765	-4.38859	1.14086e-05	0.000603937	Down	19.2749	43.509	41.4272	28.9872	56.0515	7.42346	4.51594	10.1848	9.53079	9.75098
HHLG31g0921	5.14662	5.9165	1.35054	4.38083	1.18229e-05	0.000622384	Up	0	0	0	0	0	18.5587	9.03189	8.33299	8.57771	6.96498
HHLG14g0576	12.0627	7.14134	1.63139	4.37745	1.20076e-05	0.000631225	Up	0	0	0	0	0	20.4145	0	60.1827	3.81232	36.2179
MSTRG.4781	253.586	-2.29681	0.525307	-4.37232	1.22933e-05	0.000641783	Down	653.319	600.968	59.7323	554.38	238.866	109.496	142.252	69.4416	60.044	47.3619
MSTRG.10618	33.3724	3.00472	0.687566	4.37009	1.24197e-05	0.000645703	Up	10.1447	8.15794	11.5611	7.2468	0	107.64	47.4174	37.9614	20.0147	83.5798
MSTRG.13813	37.5581	3.67562	0.842857	4.36091	1.29525e-05	0.000666536	Up	0	8.15794	8.67081	0	10.348	166.1	63.2232	59.2568	33.3578	26.4669
HHLG22g0440	5.30494	-5.77862	1.32991	-4.34511	1.39207e-05	0.000707205	Down	6.08683	10.8773	7.70739	16.3053	12.0726	0	0	0	0	0
MSTRG.26964	129.995	2.16125	0.498031	4.33959	1.42749e-05	0.000720358	Up	50.7235	42.6026	53.9517	21.7404	68.1242	146.613	202.089	59.2568	168.695	486.156
MSTRG.29303	48.6789	-3.51679	0.810759	-4.33765	1.44013e-05	0.0007248	Down	147.098	167.691	15.4148	49.8217	68.1242	7.42346	0	5.55533	22.8739	2.78599
MSTRG.11675	37.8155	2.51208	0.57936	4.33596	1.45124e-05	0.000728452	Up	24.3473	7.2515	15.4148	1.8117	7.76098	49.1804	51.9334	49.9979	56.2317	114.226
MSTRG.3348	40.5214	4.76003	1.10024	4.32635	1.516e-05	0.000755939	Up	0	7.2515	0	3.6234	3.44932	96.505	193.057	54.6274	46.7009	0
HHLG11g0028	5.84861	-5.91782	1.37209	-4.31301	1.61046e-05	0.000796733	Down	4.05788	10.8773	22.1587	14.4936	6.89865	0	0	0	0	0
HHLG25g0453	7.15318	-6.21048	1.44574	-4.29572	1.74129e-05	0.000856974	Down	7.1013	7.2515	8.67081	4.52925	43.9789	0	0	0	0	0
HHUNg1358	15.4642	5.27939	1.23245	4.28366	1.83841e-05	0.000897758	Up	4.05788	0	0	0	0	8.35139	45.1594	72.2192	9.53079	15.323
MSTRG.17245	8.92068	6.70395	1.57592	4.25399	2.09997e-05	0.00101499	Up	0	0	0	0	0	0	24.8377	24.999	14.2962	25.0739
MSTRG.9205	163.601	2.11663	0.497888	4.25122	2.12609e-05	0.00102369	Up	68.984	50.7605	71.2934	36.234	79.3345	225.488	667.231	203.695	159.164	73.8288
MSTRG.17009	247.116	2.00288	0.471688	4.2462	2.17423e-05	0.00104554	Up	55.7959	79.7665	196.538	98.7376	62.9502	716.364	322.89	569.421	236.364	132.335
MSTRG.29450	26.4481	3.49646	0.825269	4.23675	2.26779e-05	0.00107819	Up	0	0	2.89027	6.34095	12.0726	24.1262	88.0609	40.7391	42.8885	47.3619
MSTRG.12255	51.3781	-5.03235	1.18905	-4.23225	2.31361e-05	0.00109446	Down	5.07235	407.897	9.63424	68.8446	6.89865	0	0	3.70355	4.76539	6.96498
MSTRG.9436	56.3445	2.29677	0.542884	4.23068	2.32987e-05	0.00109814	Up	24.3473	25.3803	14.4514	3.6234	27.5946	107.64	125.317	83.3299	123.9	27.8599
MSTRG.5460	41.3727	2.59608	0.613635	4.23066	2.3301e-05	0.00109814	Up	0	9.06438	18.3051	20.8345	10.348	92.7933	60.9653	66.6639	40.0293	94.7238
MSTRG.1379	41.694	2.37763	0.562482	4.22704	2.3679e-05	0.00111457	Up	14.2026	9.97082	10.5977	9.96435	22.4206	17.6307	139.994	89.8111	43.8416	58.5059
MSTRG.22553	14.6391	3.57839	0.849416	4.21276	2.52264e-05	0.00118005	Up	3.04341	0	5.78054	0	2.58699	29.6938	24.8377	41.6649	9.53079	29.2529
MSTRG.17127	32.232	-2.83618	0.67494	-4.20212	2.64423e-05	0.00122631	Down	65.9406	76.1408	32.7564	84.244	22.4206	3.71173	4.51594	3.70355	3.81232	25.0739
MSTRG.18461	31.268	4.36933	1.03997	4.20141	2.65254e-05	0.00122865	Up	0	0	0	10.8702	3.44932	64.9553	146.768	23.1472	49.5601	13.93
MSTRG.13412	651.56	-2.31364	0.552795	-4.18536	2.8472e-05	0.00130919	Down	1502.43	1307.08	288.064	1992.87	334.585	494.588	235.958	115.736	146.774	97.5098
MSTRG.11314	50.9313	2.89179	0.69402	4.16672	3.09014e-05	0.00141231	Up	5.07235	15.4094	7.70739	5.4351	26.7323	145.685	123.059	104.625	68.6217	6.96498
MSTRG.8942	56.6139	2.18317	0.52717	4.14131	3.45335e-05	0.00155081	Up	24.3473	43.509	9.63424	11.776	12.935	78.8743	182.896	68.5157	87.6833	45.9689
MSTRG.15451	54.6667	2.18562	0.528996	4.13163	3.60205e-05	0.00160832	Up	9.13024	18.1288	11.5611	14.4936	44.8412	86.2977	151.284	97.2182	34.3108	79.4008
HHLG49g0495	4.79951	5.81432	1.4094	4.12538	3.70122e-05	0.00164582	Up	0	0	0	0	0	16.7028	13.5478	7.4071	4.76539	5.57199
MSTRG.18950	27.6001	2.04635	0.496141	4.12454	3.71474e-05	0.0016499	Up	18.2605	11.7837	10.5977	8.15265	5.17399	44.5408	58.7073	19.4436	53.3724	45.9689
MSTRG.27206	14.7251	3.92468	0.953129	4.11768	3.8271e-05	0.00168006	Up	0	3.62575	1.92685	0	3.44932	20.4145	62.0942	9.25888	38.1232	8.35798
MSTRG.341	5.3826	-5.798	1.41014	-4.11164	3.92856e-05	0.00171662	Down	12.1737	21.7545	3.8537	10.8702	5.17399	0	0	0	0	0
HHLG45g0130	120.493	2.02425	0.492819	4.1075	3.99963e-05	0.00174164	Up	26.3762	69.7957	37.5735	66.127	37.9426	321.993	279.989	138.883	185.85	40.3969
MSTRG.20985	43.8964	-3.23064	0.790155	-4.08861	4.33958e-05	0.00187669	Down	199.851	48.0412	36.6101	98.7376	13.7973	14.8469	15.8058	5.55533	5.71847	0
MSTRG.25403	14.5878	4.21521	1.03286	4.08112	4.48188e-05	0.00192065	Up	0	3.62575	3.8537	0	0	31.5497	40.6435	7.4071	47.6539	11.144
MSTRG.15895	57.8747	-3.28977	0.806656	-4.07828	4.53698e-05	0.00194207	Down	3.04341	103.334	239.893	56.1627	122.451	9.27933	28.2247	4.62944	4.76539	6.96498
MSTRG.18750	82.8819	2.62854	0.647311	4.06071	4.89245e-05	0.00208009	Up	20.2894	19.0352	25.049	0	50.8775	157.749	83.545	170.363	112.463	189.448
MSTRG.14570	57.3571	2.32666	0.573273	4.05855	4.93777e-05	0.00209464	Up	4.05788	12.6901	52.0249	16.3053	10.348	73.3067	146.768	97.2182	98.1671	62.6848
MSTRG.21056	7.62004	6.48356	1.59975	4.05287	5.0593e-05	0.00213661	Up	0	0	0	0	0	31.5497	9.03189	20.3695	15.2493	0
MSTRG.21602	18.6529	-2.98493	0.736809	-4.05116	5.09653e-05	0.00214275	Down	39.5644	51.667	17.3416	48.01	9.48564	6.49553	4.51594	2.77766	6.67155	0
MSTRG.12154	75.47	2.61494	0.647201	4.04039	5.3363e-05	0.0022343	Up	17.246	7.2515	43.3541	4.52925	33.6309	160.532	200.96	163.882	101.026	22.2879
MSTRG.30228	8.22905	-6.41104	1.58849	-4.03594	5.4384e-05	0.00227181	Down	0	12.6901	27.9393	23.5521	18.109	0	0	0	0	0
MSTRG.14254	70.705	-2.03796	0.507561	-4.0152	5.93945e-05	0.00245539	Down	141.011	54.3863	140.66	82.4323	150.908	59.3877	7.9029	23.1472	30.4985	16.716
HHLG40g0839	8.58617	6.64707	1.65819	4.00862	6.10738e-05	0.00251094	Up	0	0	0	0	0	26.91	7.9029	9.25888	0	41.7899
HHLG31g0796	27.8653	3.35263	0.837356	4.00383	6.23255e-05	0.00254123	Up	12.1737	0	3.8537	5.4351	3.44932	12.9911	51.9334	38.8873	16.2023	133.728
MSTRG.30237	5.50695	5.99778	1.499	4.0012	6.30225e-05	0.00256411	Up	0	0	0	0	0	3.71173	11.2899	3.70355	5.71847	30.6459
HHLG4g1034	18.44	3.08547	0.771513	3.99924	6.35457e-05	0.00258262	Up	7.1013	3.62575	0	2.71755	6.03632	48.2525	55.3203	30.5543	23.827	6.96498
MSTRG.24003	73.3271	-2.22031	0.555239	-3.99883	6.36558e-05	0.00258432	Down	245.502	75.2343	59.7323	163.959	58.6385	15.7749	41.7725	7.4071	27.6393	37.6109
MSTRG.17592	1299.4	2.90325	0.7268	3.99457	6.48114e-05	0.00262065	Up	988.095	110.585	131.026	126.819	175.916	4452.22	3033.59	1389.76	1091.28	1494.69
MSTRG.29213	6.70599	-4.9119	1.22991	-3.99372	6.50452e-05	0.00262662	Down	8.11577	14.503	17.3416	14.4936	10.348	0	2.25797	0	0	0
MSTRG.22551	114.089	2.00421	0.503307	3.98209	6.83125e-05	0.0027439	Up	83.1866	19.0352	38.537	54.351	32.7686	183.731	407.564	141.661	86.7302	93.3308
MSTRG.10376	14.3446	2.95074	0.742679	3.9731	7.09419e-05	0.00283146	Up	0	2.71931	4.81712	1.8117	6.89865	36.1894	24.8377	18.5178	11.4369	36.2179
MSTRG.643	28.411	-2.49502	0.628185	-3.97179	7.13332e-05	0.00283809	Down	109.563	29.006	16.3782	57.0685	29.3193	12.0631	12.4188	3.70355	7.62463	6.96498
MSTRG.5558	26.5453	2.57169	0.647484	3.97182	7.13268e-05	0.00283809	Up	2.02894	19.9416	3.8537	5.4351	6.89865	64.9553	46.2884	42.5908	58.1378	15.323
MSTRG.20455	433.694	-2.39543	0.603048	-3.97221	7.12102e-05	0.00283809	Down	1463.88	808.543	296.735	855.122	219.894	167.956	283.376	14.8142	127.713	98.9028
MSTRG.8425	708.29	-2.25944	0.569169	-3.96971	7.19598e-05	0.002857	Down	2250.1	1230.04	307.332	1770.94	300.954	416.642	373.694	67.5898	206.818	158.802
HHLG6g0634	4.23375	5.6353	1.42335	3.95918	7.52084e-05	0.00297038	Up	0	0	0	0	0	13.919	10.1609	7.4071	6.67155	4.17899
MSTRG.25933	98.2145	2.67619	0.676272	3.95727	7.58124e-05	0.00298799	Up	41.5933	14.503	10.5977	48.9159	17.2466	121.559	447.079	89.8111	18.1085	172.732
MSTRG.27036	162.316	2.15528	0.5452	3.95318	7.71187e-05	0.00303315	Up	88.259	44.4155	61.6591	48.9159	54.3269	116.92	785.774	126.847	101.026	195.02
HHLG48g0036	13.6001	4.1092	1.04239	3.94209	8.07749e-05	0.00315397	Up	0	0	3.8537	3.6234	0	26.91	44.0305	13.8883	38.1232	5.57199
HHLG23g0369	7.06664	6.36826	1.61637	3.93984	8.15343e-05	0.00317379	Up	0	0	0	0	0	14.8469	19.1928	18.5178	0	18.109
MSTRG.9204	203.108	2.09096	0.532145	3.92932	8.5188e-05	0.00329228	Up	153.185	48.9476	47.2078	86.9616	50.0152	256.109	864.803	241.657	140.103	142.086
MSTRG.14362	35.2311	2.67917	0.682686	3.92446	8.69252e-05	0.00335256	Up	3.04341	8.15794	0	14.4936	21.5583	51.0363	67.7392	52.7756	45.7478	87.7588
MSTRG.18059	12.2515	-2.81435	0.71944	-3.91187	9.15849e-05	0.00348253	Down	20.2894	19.0352	34.6833	18.117	14.6596	2.7838	4.51594	0	2.85924	5.57199
MSTRG.18341	284.56	-2.2287	0.570211	-3.90856	9.28482e-05	0.00351994	Down	40.5788	674.39	1003.89	389.515	237.141	79.8022	81.287	135.18	125.806	78.0078
MSTRG.28453	17.0487	5.50806	1.40963	3.90746	9.32721e-05	0.00353247	Up	0	3.62575	0	0	0	0	48.5464	37.9614	37.1701	43.1829
MSTRG.8469	99.1985	5.50441	1.40934	3.90567	9.39646e-05	0.00355514	Up	4.05788	0	0	0	17.2466	157.749	572.396	117.588	68.6217	54.3269
MSTRG.29102	83.0963	-3.04459	0.780039	-3.90312	9.49597e-05	0.00358919	Down	413.904	134.153	71.2934	85.1499	36.2179	0	29.3536	11.1107	21.9208	27.8599
MSTRG.24256	130.508	2.28609	0.586166	3.90008	9.61604e-05	0.0036237	Up	22.3184	31.7253	110.794	8.15265	49.1529	131.766	408.693	203.695	246.847	91.9378
HHLG25g0598	21.6384	4.40925	1.13248	3.89346	9.88254e-05	0.00370934	Up	0	0	0	0.90585	8.62331	24.1262	39.5145	6.48121	26.6862	110.047
MSTRG.18995	130.675	5.08748	1.30716	3.892	9.94224e-05	0.00372804	Up	5.07235	5.43863	0	0	26.7323	206.001	620.942	140.735	290.689	11.144
MSTRG.29974	18.5192	-2.6482	0.682955	-3.87756	0.000105509	0.00392512	Down	28.4052	72.515	18.3051	21.7404	18.9713	10.2073	5.64493	1.85178	4.76539	2.78599
HHLG33g0634	11.6756	3.15501	0.813878	3.87651	0.000105964	0.00393809	Up	0	4.53219	0	3.6234	3.44932	25.0542	21.4507	10.1848	24.7801	23.6809
MSTRG.28450	46.1334	-2.75828	0.712159	-3.87313	0.000107448	0.00397769	Down	29.4197	72.515	130.062	114.137	56.0515	14.8469	6.77392	27.7766	0	9.75098
MSTRG.1641	51.729	-2.96283	0.76586	-3.86864	0.000109446	0.00403191	Down	240.43	69.7957	25.049	108.702	14.6596	9.27933	21.4507	2.77766	20.9677	4.17899
MSTRG.2959	83.3247	-5.07237	1.31527	-3.85651	0.000115015	0.00420836	Down	8.11577	649.01	8.67081	127.725	15.522	7.42346	5.64493	2.77766	0	8.35798
HHLG18g0682	19.9546	2.69594	0.699426	3.8545	0.000115966	0.00423493	Up	4.05788	0.906438	3.8537	12.6819	5.17399	75.1625	22.5797	30.5543	18.1085	26.4669
MSTRG.10938	29.7166	2.77418	0.719691	3.85468	0.000115883	0.00423493	Up	6.08683	3.62575	1.92685	22.6462	3.44932	39.9011	36.1276	43.5167	22.8739	117.012
MSTRG.4095	778.528	-2.10388	0.546114	-3.85246	0.000116938	0.00426029	Down	2603.13	1184.71	560.713	1452.08	515.674	715.436	145.639	75.9228	247.801	284.171
MSTRG.4673	207.999	-2.14512	0.556817	-3.85247	0.000116932	0.00426029	Down	769.983	292.779	130.062	380.457	123.313	143.83	104.996	21.2954	53.3724	59.8989
MSTRG.6121	29.4042	-2.09057	0.543007	-3.84998	0.000118125	0.00428072	Down	28.4052	49.8541	30.8296	76.9972	52.6022	23.1983	7.9029	12.9624	5.71847	5.57199
MSTRG.29693	14.6465	4.64404	1.20984	3.83855	0.000123763	0.00444243	Up	0	1.81288	3.8537	0	0	29.6938	84.674	3.70355	17.1554	5.57199
HHLG31g0471	7.19622	4.61506	1.20508	3.82966	0.00012832	0.00457126	Up	0	0	2.89027	0	0	12.9911	18.0638	11.1107	17.1554	9.75098
HHLG2g0603	72.3919	-2.39105	0.624417	-3.82925	0.000128534	0.00457459	Down	242.459	119.65	35.6467	183.888	26.7323	42.6849	11.2899	12.9624	30.4985	18.109
HHLG12g0735	10.8637	-4.37629	1.146	-3.81874	0.000134135	0.00472939	Down	12.1737	36.2575	26.9759	18.117	10.348	0	0	0	4.76539	0
MSTRG.14490	9.98905	-4.27058	1.12273	-3.80375	0.000142524	0.00498468	Down	16.2315	25.3803	11.5611	14.4936	27.5946	0	0	4.62944	0	0
HHLG30g0239	6.6008	6.26835	1.64872	3.80196	0.000143557	0.00501018	Up	0	0	0	0	0	0	13.5478	11.1107	19.0616	22.2879
MSTRG.20557	17.1889	3.82659	1.00669	3.80114	0.000144029	0.00501931	Up	5.07235	0	0	6.34095	0	36.1894	41.7725	53.7015	19.0616	9.75098
MSTRG.17445	16.8929	-4.4575	1.17282	-3.80067	0.000144308	0.00502246	Down	57.8248	67.0764	1.92685	21.7404	12.935	4.63966	0	0	0	2.78599
HHLG3g0382	4.2763	-5.46802	1.44006	-3.79708	0.000146409	0.00508625	Down	4.05788	7.2515	9.63424	5.4351	16.3843	0	0	0	0	0
MSTRG.28302	9.35376	-3.77805	0.994989	-3.79708	0.000146409	0.00508625	Down	14.2026	9.97082	24.0856	19.0228	19.8336	0	4.51594	0	1.90616	0
MSTRG.27960	292.909	5.54498	1.46658	3.78088	0.000156275	0.00536002	Up	0	0	0	19.9287	41.3919	418.498	1052.22	485.165	487.023	424.864
MSTRG.13084	17.462	-2.64237	0.699774	-3.77604	0.000159341	0.0054405	Down	66.9551	9.97082	28.9027	14.4936	30.1816	4.63966	6.77392	1.85178	6.67155	4.17899
MSTRG.24241	81.9377	2.71865	0.721795	3.76652	0.00016554	0.00560657	Up	7.1013	8.15794	76.1105	8.15265	8.62331	47.3246	318.374	89.8111	121.994	133.728
MSTRG.17781	78.0503	2.3506	0.625642	3.7571	0.000171896	0.00578554	Up	16.2315	4.53219	22.1587	65.2212	19.8336	313.641	73.3841	88.8852	97.214	79.4008
HHUNg0161	17.6754	2.92724	0.7801	3.75239	0.00017516	0.00587446	Up	4.05788	0	5.78054	9.0585	1.72466	31.5497	54.1913	29.6284	32.4047	8.35798
MSTRG.27650	6.82915	4.15047	1.10869	3.74359	0.000181407	0.00603047	Up	0	0	0	1.8117	1.72466	16.7028	6.77392	7.4071	17.1554	16.716
MSTRG.429	10.6043	3.69959	0.988527	3.74253	0.000182177	0.00604178	Up	4.05788	0	0	3.6234	0	9.27933	28.2247	22.2213	21.9208	16.716
MSTRG.16852	489.203	-2.27828	0.609119	-3.74028	0.000183813	0.00607837	Down	2035.03	582.84	81.891	1050.79	305.265	269.1	176.122	119.439	69.5748	201.985
HHLG29g0549	36.2001	2.25356	0.602659	3.73937	0.000184482	0.00609515	Up	8.11577	17.2223	14.4514	12.6819	10.348	111.352	101.609	39.8132	35.2639	11.144
HHLG1g0189	8.491	4.89594	1.3101	3.73708	0.000186171	0.00613488	Up	0	2.71931	0	0	0	33.4056	18.0638	7.4071	3.81232	19.502
MSTRG.18987	32.2428	2.18991	0.586044	3.73676	0.000186405	0.00613724	Up	28.4052	12.6901	3.8537	8.15265	5.17399	75.1625	75.6421	39.8132	42.8885	30.6459
HHLG43g0591	6.94664	6.34371	1.70369	3.72352	0.000196462	0.00640698	Up	0	0	0	0	0	12.0631	39.5145	0	9.53079	8.35798
MSTRG.6161	20.7288	4.49752	1.20851	3.72153	0.000198019	0.00644663	Up	0	0	0	0	8.62331	64.9553	59.8363	25.9249	4.76539	43.1829
MSTRG.17891	22.333	-2.78884	0.752631	-3.70546	0.000211008	0.00678764	Down	66.9551	61.6378	19.2685	37.1398	10.348	11.1352	0	5.55533	5.71847	5.57199
MSTRG.19060	31.2045	2.4563	0.666184	3.68712	0.000226809	0.00722826	Up	10.1447	7.2515	0	7.2468	23.2829	47.3246	85.8029	48.1462	43.8416	39.0039
MSTRG.26418	165.832	-2.3893	0.648492	-3.68439	0.000229253	0.00729385	Down	392.6	412.429	97.3058	375.022	115.552	122.487	45.1594	3.70355	64.8094	29.2529
MSTRG.28753	92.8018	-2.90446	0.792905	-3.66306	0.000249222	0.00784986	Down	201.88	91.5502	63.586	57.0685	404.433	0	53.0624	12.9624	29.5454	13.93
MSTRG.16181	32.6295	3.10614	0.848892	3.65905	0.000253153	0.0079538	Up	3.04341	10.8773	0	0	19.8336	48.2525	73.3841	54.6274	61.9501	54.3269
MSTRG.29602	13.4154	-3.72633	1.01991	-3.65359	0.0002586	0.00808463	Down	12.1737	16.3159	17.3416	48.9159	29.3193	0	4.51594	0	0	5.57199
MSTRG.28141	132.141	2.37967	0.651949	3.65009	0.00026215	0.00817532	Up	45.6512	76.1408	41.4272	31.7047	18.109	316.425	591.589	85.1817	37.1701	78.0078
HHLG18g0466	6.29399	6.20198	1.7047	3.63818	0.000274575	0.00849968	Up	0	0	0	0	0	15.7749	4.51594	23.1472	0	19.502
HHLG13g0626	34.3344	-2.61365	0.71943	-3.63294	0.00028021	0.00862468	Down	115.65	42.6026	22.1587	69.7504	44.8412	16.7028	0	11.1107	3.81232	16.716
MSTRG.14412	7.97011	-6.36245	1.7551	-3.62512	0.000288826	0.00884101	Down	55.7959	11.7837	5.78054	6.34095	0	0	0	0	0	0
MSTRG.6519	57.3917	2.61143	0.72283	3.61279	0.000302919	0.00918894	Up	24.3473	4.53219	9.63424	36.234	6.03632	62.1715	276.602	46.2944	85.7771	22.2879
MSTRG.7452	55.6277	2.70357	0.748786	3.6106	0.000305484	0.0092445	Up	35.5065	0	12.5245	6.34095	19.8336	45.4687	171.606	150.92	66.7155	47.3619
MSTRG.25932	64.9447	2.617	0.726747	3.60098	0.00031702	0.00951841	Up	18.2605	18.1288	0	39.8574	14.6596	64.9553	244.99	95.3664	36.217	117.012
HHLG17g0678	9.55477	-4.23132	1.17614	-3.59763	0.000321129	0.00961393	Down	20.2894	19.9416	9.63424	27.1755	12.935	0	0	0	0	5.57199
MSTRG.30170	6.1243	6.16503	1.71697	3.59064	0.000329865	0.0097941	Up	0	0	0	0	0	19.4866	30.4826	5.55533	5.71847	0
MSTRG.7289	149.527	-2.09401	0.583927	-3.58609	0.000335677	0.00992768	Down	239.415	440.529	131.026	305.271	95.7188	136.406	22.5797	12.9624	69.5748	41.7899
MSTRG.2515	12.3587	3.25178	0.90727	3.58414	0.000338194	0.00996484	Up	0	0	2.89027	1.8117	6.89865	29.6938	37.2565	9.25888	19.0616	16.716
HHLG39g0728	6.52975	4.46769	1.24668	3.58365	0.000338821	0.00996607	Up	0	0	2.89027	0	0	7.42346	12.4188	18.5178	14.2962	9.75098
MSTRG.19661	205.722	-2.08235	0.581492	-3.58105	0.00034221	0.0100235	Down	600.567	374.359	127.172	464.701	97.4434	135.478	136.607	17.5919	44.7947	58.5059
HHLG28g0624	18.2384	-2.5231	0.705785	-3.57488	0.000350383	0.0102266	Down	37.5354	13.5966	41.4272	23.5521	38.8049	3.71173	0	7.4071	3.81232	12.537
MSTRG.13382	12.6639	-3.29796	0.922713	-3.5742	0.000351298	0.0102371	Down	9.13024	19.9416	40.4638	38.9515	6.89865	2.7838	0	3.70355	4.76539	0
MSTRG.17124	103.679	2.63417	0.737303	3.57271	0.000353306	0.0102565	Up	4.05788	80.673	4.81712	48.9159	5.17399	126.199	287.891	116.662	117.229	245.167
HHLG44g0131	20.2508	-2.50729	0.704485	-3.55903	0.00037222	0.0106825	Down	49.7091	32.6318	9.63424	31.7047	49.1529	11.1352	4.51594	9.25888	4.76539	0
MSTRG.28067	238.702	2.40352	0.675517	3.55804	0.000373627	0.0107147	Up	115.65	72.515	106.94	47.1042	37.0802	168.884	220.152	53.7015	170.601	1394.39
HHUNg2013	13.5046	-3.45172	0.973105	-3.54713	0.00038946	0.0110543	Down	13.1881	18.1288	23.1222	44.3866	25.0076	5.5676	5.64493	0	0	0
HHLG17g0611	18.2089	2.40848	0.679422	3.54489	0.000392773	0.011112	Up	5.07235	0	7.70739	12.6819	3.44932	42.6849	22.5797	29.6284	27.6393	30.6459
MSTRG.14433	5.79202	-5.90504	1.66668	-3.54299	0.000395612	0.0111672	Down	0	13.5966	10.5977	19.9287	13.7973	0	0	0	0	0
HHLG32g0629	37.3736	2.39945	0.677313	3.5426	0.0003962	0.0111755	Up	8.11577	13.5966	13.4879	24.4579	0	93.7212	53.0624	85.1817	51.4663	30.6459
MSTRG.27713	9.77677	-3.60461	1.01839	-3.53951	0.000400875	0.0112821	Down	12.1737	21.7545	9.63424	20.8345	25.8699	1.85587	5.64493	0	0	0
HHLG11g0720	7.72459	4.23728	1.19985	3.53152	0.000413181	0.0115661	Up	4.05788	0	0	0	0	13.919	18.0638	7.4071	14.2962	19.502
MSTRG.2741	50.7887	-2.57447	0.729086	-3.5311	0.000413837	0.0115694	Down	148.113	74.3279	60.6957	110.514	41.3919	29.6938	27.0957	0	10.4839	5.57199
HHLG15g0417	6.75983	-6.12623	1.7359	-3.52913	0.00041693	0.01163	Down	23.3328	14.503	0	27.1755	2.58699	0	0	0	0	0
HHLG41g0352	4.15594	-4.81288	1.3655	-3.52463	0.000424074	0.0117945	Down	10.1447	8.15794	13.4879	4.52925	4.31166	0.927933	0	0	0	0
MSTRG.28466	5.99705	-5.95562	1.69049	-3.52302	0.000426663	0.011823	Down	0	10.8773	6.74397	19.9287	22.4206	0	0	0	0	0
MSTRG.24237	15.7058	5.28349	1.50473	3.51126	0.000445995	0.0122331	Up	4.05788	0	0	0	0	24.1262	94.8348	9.25888	24.7801	0
MSTRG.8620	86.0604	-2.02609	0.577492	-3.50843	0.000450757	0.012328	Down	177.532	119.65	101.16	210.157	82.7838	78.8743	37.2565	3.70355	28.5924	20.8949
MSTRG.20807	174.048	-2.00749	0.572266	-3.50797	0.000451542	0.0123405	Down	404.774	315.44	88.635	418.503	167.292	81.6581	77.9	110.181	70.5278	5.57199
MSTRG.29526	21.4367	2.62774	0.749742	3.50486	0.000456854	0.0124587	Up	8.11577	0	9.63424	1.8117	10.348	22.2704	46.2884	20.3695	67.6686	27.8599
MSTRG.27915	14.1063	3.85134	1.09901	3.50438	0.000457664	0.0124628	Up	0	3.62575	0	5.4351	0	10.2073	74.5131	10.1848	16.2023	20.8949
MSTRG.26809	35.1347	-4.76877	1.36141	-3.50282	0.000460356	0.0125271	Down	0	277.37	3.8537	47.1042	10.348	3.71173	3.38696	0	0	5.57199
HHLG11g0623	34.9632	2.67603	0.764562	3.50008	0.000465111	0.0126292	Up	8.11577	0	8.67081	24.4579	6.03632	87.2257	108.383	17.5919	36.217	52.9339
HHLG38g0812	5.7824	-5.90029	1.68602	-3.49954	0.000466065	0.012646	Down	22.3184	13.5966	11.5611	0	10.348	0	0	0	0	0
MSTRG.1643	31.5638	-2.49715	0.713895	-3.49793	0.000468893	0.0127045	Down	80.1432	50.7605	29.8661	83.3382	24.1453	18.5587	14.6768	0	8.57771	5.57199
HHLG21g0337	9.14811	4.58124	1.31161	3.49284	0.000477908	0.0129025	Up	0	0	0	3.6234	0	11.1352	45.1594	3.70355	18.1085	9.75098
MSTRG.27279	15.6298	3.02582	0.867576	3.48768	0.000487239	0.0131076	Up	6.08683	0	7.70739	0	3.44932	22.2704	39.5145	17.5919	45.7478	13.93
MSTRG.21932	19.6863	-4.62464	1.33103	-3.47449	0.000511823	0.0136427	Down	124.78	35.3511	5.78054	5.4351	18.109	0	0	7.4071	0	0
MSTRG.29630	47.0497	-2.25483	0.65043	-3.46668	0.000526922	0.0139517	Down	178.547	71.6086	17.3416	79.7148	41.3919	18.5587	22.5797	2.77766	14.2962	23.6809
MSTRG.2304	8.45561	-4.20127	1.21441	-3.45952	0.00054114	0.0142335	Down	24.3473	19.9416	8.67081	7.2468	19.8336	0	4.51594	0	0	0
MSTRG.14176	46.2516	2.44441	0.707283	3.45606	0.00054813	0.0143773	Up	17.246	3.62575	5.78054	19.9287	25.0076	95.5771	85.8029	37.0355	9.53079	162.981
MSTRG.20854	15.0904	-3.39517	0.989004	-3.43292	0.000597113	0.0153845	Down	75.0709	19.9416	7.70739	25.3638	9.48564	4.63966	4.51594	0	0	4.17899
MSTRG.20845	99.2485	3.06772	0.894708	3.42874	0.000606391	0.0156023	Up	8.11577	56.1992	3.8537	27.1755	10.348	270.956	4.51594	386.095	19.0616	206.163
HHLG2g0165	39.521	-2.06035	0.601244	-3.42681	0.000610717	0.0156709	Down	118.693	91.5502	21.1953	67.9387	19.8336	26.91	11.2899	18.5178	9.53079	9.75098
MSTRG.17403	7.42153	-4.54865	1.32929	-3.42186	0.000621942	0.0159265	Down	14.2026	22.6609	4.81712	25.3638	4.31166	0	0	0	2.85924	0
MSTRG.28298	32.1479	-2.18232	0.63818	-3.4196	0.000627121	0.0160266	Down	26.3762	14.503	70.3299	27.1755	125.038	8.35139	12.4188	18.5178	7.62463	11.144
MSTRG.9053	24.7759	4.57628	1.3395	3.4164	0.000634538	0.0161833	Up	10.1447	0	0	0	0	116.92	69.9971	3.70355	40.0293	6.96498
MSTRG.28126	104.798	2.35794	0.690221	3.41622	0.000634977	0.0161836	Up	41.5933	45.3219	51.0615	20.8345	12.0726	51.0363	127.575	37.0355	81.9648	579.487
MSTRG.4536	110.991	-2.11429	0.619598	-3.41235	0.000644058	0.0163489	Down	324.631	183.1	105.977	218.31	68.9865	27.838	101.609	5.55533	20.9677	52.9339
MSTRG.7211	34.4318	3.48499	1.02137	3.41207	0.000644706	0.0163543	Up	0	0	18.3051	9.96435	0	100.217	42.9015	55.5533	32.4047	84.9728
MSTRG.17405	88.9363	-2.34408	0.687603	-3.40905	0.000651886	0.0164922	Down	225.213	260.148	79.0008	113.231	65.5372	76.0905	4.51594	4.62944	24.7801	36.2179
HHUNg1220	5.20376	5.93241	1.74126	3.40696	0.000656913	0.016575	Up	0	0	0	0	0	11.1352	12.4188	3.70355	24.7801	0
MSTRG.4316	180.352	7.54926	2.21879	3.40243	0.000667906	0.0167728	Up	5.07235	4.53219	0	0	0	637.49	9.03189	3.70355	1143.69	0
HHLG42g0074	7.29915	-4.12549	1.21257	-3.40226	0.000668301	0.0167728	Down	13.1881	7.2515	24.0856	12.6819	12.0726	3.71173	0	0	0	0
HHLG17g0244	41.4699	2.81995	0.830723	3.39457	0.000687366	0.0171374	Up	7.1013	0	5.78054	9.96435	28.4569	115.064	33.8696	109.255	10.4839	94.7238
MSTRG.13551	50.7631	-2.04204	0.601537	-3.39471	0.000687019	0.0171374	Down	56.8104	116.024	27.9393	165.771	41.3919	26.91	9.03189	18.5178	7.62463	37.6109
HHLG10g1068	9.15667	4.53049	1.33611	3.3908	0.000696885	0.0173519	Up	0	0	3.8537	0	0	6.49553	53.0624	7.4071	12.39	8.35798
MSTRG.28835	5.88245	-5.92513	1.74836	-3.38897	0.000701564	0.0174538	Down	26.3762	18.1288	0	10.8702	3.44932	0	0	0	0	0
MSTRG.24731	5.90406	-5.93027	1.75131	-3.38619	0.00070871	0.0175653	Down	28.4052	16.3159	0	10.8702	3.44932	0	0	0	0	0
HHLG35g0168	23.2014	2.89381	0.855171	3.38389	0.000714654	0.0176779	Up	7.1013	0	0	9.96435	10.348	51.9642	49.6754	24.0731	16.2023	62.6848
HHLG10g0731	5.16564	5.9185	1.75047	3.38109	0.000721999	0.0178246	Up	0	0	0	0	0	18.5587	19.1928	8.33299	0	5.57199
MSTRG.1025	9.01358	6.71919	1.98985	3.37674	0.000733507	0.0180497	Up	0	0	0	0	0	0	45.1594	21.2954	0	23.6809
MSTRG.19512	104.569	2.26032	0.670616	3.37051	0.000750289	0.0183962	Up	4.05788	34.4446	36.6101	15.3994	89.6824	233.839	171.606	49.9979	74.3402	335.712
MSTRG.29458	38.9124	-3.34576	0.994927	-3.36282	0.000771506	0.0188012	Down	89.2734	36.2575	16.3782	18.117	194.025	0	6.77392	0	17.1554	11.144
MSTRG.1394	43.8992	2.03676	0.606065	3.36063	0.000777658	0.0189023	Up	8.11577	15.4094	34.6833	3.6234	24.1453	60.3156	152.413	53.7015	44.7947	41.7899
MSTRG.25757	397.326	-2.03866	0.607005	-3.35855	0.000783515	0.019008	Down	117.679	1034.25	885.387	110.514	1047.73	180.019	48.5464	109.255	260.191	179.697
MSTRG.29880	9.85521	-3.79073	1.13509	-3.33959	0.000839033	0.0200461	Down	22.3184	38.0704	9.63424	18.117	3.44932	2.7838	0	0	0	4.17899
MSTRG.8671	7.42156	5.24505	1.57674	3.32653	0.000879359	0.0207143	Up	2.02894	0	0	0	0	29.6938	10.1609	0	11.4369	20.8949
HHLG36g0484	5.10484	-5.72153	1.72411	-3.31853	0.000904914	0.0212441	Down	14.2026	16.3159	0	14.4936	6.03632	0	0	0	0	0
MSTRG.1597	30.3083	2.97125	0.895774	3.31696	0.000910018	0.0213374	Up	5.07235	2.71931	0.963424	7.2468	18.109	4.63966	7.9029	65.738	84.824	105.868
MSTRG.18201	130.075	2.49678	0.753176	3.315	0.00091642	0.0214609	Up	85.2156	46.2283	8.67081	48.01	7.76098	79.8022	718.035	170.363	60.044	76.6148
MSTRG.24008	15.3239	-3.60302	1.08762	-3.31275	0.000923843	0.0215988	Down	68.984	12.6901	17.3416	31.7047	10.348	0	0	0	3.81232	8.35798
HHLG49g0352	5.50912	6.00319	1.81384	3.30966	0.000934079	0.0218069	Up	0	0	0	0	0	4.63966	4.51594	11.1107	0	34.8249
MSTRG.22602	20.2006	-3.93686	1.19091	-3.30575	0.000947235	0.0220188	Down	19.2749	32.6318	13.4879	61.5978	62.9502	12.0631	0	0	0	0
MSTRG.12126	8.29291	3.34235	1.01127	3.30508	0.000949484	0.0220266	Up	2.02894	3.62575	0	0	1.72466	12.9911	5.64493	9.25888	11.4369	36.2179
MSTRG.13281	79.5119	3.02558	0.915466	3.30496	0.0009499	0.0220266	Up	10.1447	0.906438	0	70.6563	5.17399	86.2977	155.8	104.625	173.46	188.055
HHLG26g0659	9.89486	-2.82756	0.856165	-3.30259	0.000957963	0.0221443	Down	15.2171	21.7545	26.9759	11.776	11.2103	4.63966	4.51594	0	2.85924	0
HHLG26g0228	5.14459	-4.52678	1.37579	-3.29032	0.00100073	0.0228825	Down	8.11577	21.7545	3.8537	7.2468	8.62331	0	0	1.85178	0	0
MSTRG.5661	8.59944	-3.8782	1.17883	-3.28988	0.00100231	0.0228909	Down	11.1592	10.8773	20.2319	20.8345	17.2466	0	5.64493	0	0	0
MSTRG.27907	11.9487	-2.1012	0.639488	-3.28575	0.00101713	0.0231593	Down	12.1737	16.3159	25.049	26.2696	17.2466	1.85587	5.64493	8.33299	3.81232	2.78599
HHLG41g0344	4.59126	5.74979	1.75561	3.27509	0.00105629	0.0238499	Up	0	0	0	0	0	10.2073	22.5797	7.4071	5.71847	0
HHLG30g0460	8.26743	-4.1628	1.27166	-3.27351	0.00106219	0.0239402	Down	10.1447	7.2515	22.1587	31.7047	6.89865	0	4.51594	0	0	0
MSTRG.17628	6.70551	-4.00061	1.22346	-3.26993	0.00107575	0.0241738	Down	11.1592	8.15794	8.67081	18.117	17.2466	0	0	3.70355	0	0
MSTRG.5159	31.9583	2.95788	0.905907	3.2651	0.00109424	0.0245328	Up	4.05788	2.71931	0	4.52925	25.0076	161.46	24.8377	40.7391	38.1232	18.109
HHLG31g0462	29.2577	2.80038	0.85795	3.26404	0.00109837	0.0245798	Up	4.05788	11.7837	17.3416	3.6234	0	44.5408	129.833	26.8507	44.7947	9.75098
HHLG22g0096	19.6057	-2.37212	0.729516	-3.25163	0.00114744	0.0254517	Down	20.2894	48.0412	11.5611	48.9159	35.3556	6.49553	12.4188	7.4071	0	5.57199
HHLG23g0723	15.531	2.21111	0.680082	3.25124	0.00114902	0.0254568	Up	0	6.34507	10.5977	4.52925	6.03632	23.1983	28.2247	37.9614	13.3431	25.0739
MSTRG.24113	9.6685	-3.72759	1.14734	-3.24891	0.0011585	0.025577	Down	5.07235	42.6026	5.78054	10.8702	25.8699	3.71173	0	2.77766	0	0
MSTRG.21392	68.9586	2.03275	0.628162	3.23602	0.00121207	0.0265273	Up	16.2315	19.0352	77.0739	19.9287	3.44932	156.821	99.3508	125.921	125.806	45.9689
MSTRG.2466	515.978	3.92128	1.21259	3.23381	0.0012215	0.0266565	Up	261.734	39.8833	3.8537	7.2468	6.89865	364.678	641.264	262.952	221.114	3350.16
MSTRG.16701	78.0102	2.38804	0.739157	3.23077	0.00123459	0.0268956	Up	10.1447	68.8893	19.2685	20.8345	6.03632	62.1715	97.0928	110.181	365.982	19.502
HHLG37g0817	28.3689	2.41009	0.746317	3.22932	0.00124087	0.0270012	Up	8.11577	19.9416	0	7.2468	9.48564	37.1173	97.0928	42.5908	13.3431	48.7549
MSTRG.13268	19.9435	2.72465	0.846605	3.21833	0.00128941	0.0278014	Up	12.1737	5.43863	0	0	8.62331	25.0542	27.0957	22.2213	51.4663	47.3619
MSTRG.13020	87.5242	-2.27408	0.706724	-3.21778	0.00129188	0.0278266	Down	33.4775	440.529	42.3907	148.559	60.3632	41.757	12.4188	49.9979	9.53079	36.2179
MSTRG.22448	27.9561	3.01131	0.936792	3.2145	0.00130673	0.0281107	Up	20.2894	0	3.8537	0	6.89865	51.9642	14.6768	95.3664	41.9355	44.5759
MSTRG.2925	4.44786	5.70586	1.77933	3.20676	0.00134241	0.0287362	Up	0	0	0	0	0	4.63966	14.6768	19.4436	5.71847	0
MSTRG.29511	32.9401	2.42584	0.757328	3.20316	0.00135929	0.0289776	Up	25.3618	3.62575	2.89027	1.8117	18.109	24.1262	107.254	78.7004	43.8416	23.6809
HHLG11g0264	12.5856	-3.21906	1.00585	-3.20034	0.00137266	0.0292131	Down	64.9261	22.6609	6.74397	10.8702	8.62331	0	4.51594	3.70355	3.81232	0
MSTRG.20687	52.2453	-2.12887	0.665395	-3.19941	0.00137709	0.0292909	Down	80.1432	100.615	52.9883	87.8674	103.48	33.4056	36.1276	11.1107	0	16.716
MSTRG.20759	18.3378	2.71929	0.85043	3.19755	0.00138602	0.0294311	Up	0	10.8773	0	3.6234	9.48564	45.4687	42.9015	23.1472	20.0147	27.8599
MSTRG.9592	16.2806	-2.74163	0.861236	-3.18337	0.00145573	0.030517	Down	18.2605	41.6961	28.9027	26.2696	26.7323	11.1352	7.9029	0	1.90616	0
MSTRG.24689	62.9752	-3.0645	0.966087	-3.17207	0.00151355	0.0314327	Down	168.402	94.2695	41.4272	234.615	24.1453	42.6849	14.6768	0	9.53079	0
MSTRG.27373	6.93542	3.09855	0.977293	3.17054	0.00152155	0.0315815	Up	0	2.71931	0	2.71755	1.72466	11.1352	18.0638	7.4071	20.0147	5.57199
MSTRG.21409	43.4159	-2.0808	0.656678	-3.16867	0.00153137	0.0316637	Down	16.2315	47.1348	131.989	91.4908	64.6748	15.7749	15.8058	38.8873	3.81232	8.35798
MSTRG.29111	13.5651	2.34957	0.743356	3.16075	0.00157361	0.0323425	Up	6.08683	7.2515	3.8537	0	5.17399	40.829	13.5478	28.7025	19.0616	11.144
HHLG21g0017	4.36826	5.6756	1.79586	3.16039	0.00157558	0.0323654	Up	0	0	0	0	0	19.4866	5.64493	7.4071	0	11.144
MSTRG.13282	8.41716	3.41142	1.07982	3.15925	0.00158177	0.0324221	Up	0	0	0	4.52925	2.58699	8.35139	9.03189	10.1848	28.5924	20.8949
HHLG12g0404	39.1836	-2.15884	0.683497	-3.15852	0.00158575	0.0324683	Down	146.084	70.7022	17.3416	73.3738	12.935	27.838	5.64493	12.0365	13.3431	12.537
HHLG15g0462	41.8619	3.04457	0.964893	3.15534	0.00160311	0.0326849	Up	9.13024	0	30.8296	5.4351	0	52.8922	172.735	76.8487	42.8885	27.8599
MSTRG.29502	54.2219	2.73918	0.868521	3.15384	0.00161135	0.0328324	Up	2.02894	0	26.9759	3.6234	37.9426	143.83	56.4493	161.104	62.9032	47.3619
MSTRG.12167	9.67301	2.98123	0.945542	3.15293	0.00161641	0.0329	Up	0	1.81288	0	7.2468	1.72466	12.0631	11.2899	30.5543	18.1085	13.93
HHLG41g0513	42.4665	2.70585	0.859613	3.14775	0.00164532	0.0332203	Up	22.3184	10.8773	6.74397	3.6234	12.935	77.9463	251.764	11.1107	16.2023	11.144
HHLG45g0540	9.04962	-6.54668	2.07954	-3.14814	0.00164312	0.0332203	Down	59.8538	27.1931	0	0	3.44932	0	0	0	0	0
HHLG6g0232	8.11983	-3.22462	1.02512	-3.14559	0.00165752	0.033413	Down	12.1737	20.8481	19.2685	14.4936	6.89865	0	0	3.70355	3.81232	0
MSTRG.18648	134.518	2.32078	0.739104	3.13999	0.00168955	0.0338241	Up	41.5933	68.8893	57.8054	18.117	37.9426	183.731	782.387	49.072	81.9648	23.6809
MSTRG.14432	7.54696	6.4626	2.06723	3.12621	0.00177076	0.0350232	Up	0	0	0	0	0	10.2073	48.5464	0	0	16.716
MSTRG.21770	27.3225	-2.01907	0.646131	-3.12486	0.00177889	0.0351106	Down	80.1432	35.3511	12.5245	57.0685	34.4932	19.4866	6.77392	3.70355	18.1085	5.57199
HHUNg2054	4.79043	-5.62825	1.80187	-3.12356	0.00178677	0.0351908	Down	26.3762	8.15794	0	9.0585	4.31166	0	0	0	0	0
MSTRG.28995	34.9246	-2.25707	0.72278	-3.12276	0.00179165	0.0352337	Down	76.0853	87.018	27.9393	75.1855	22.4206	18.5587	6.77392	0	17.1554	18.109
MSTRG.28312	13.64	3.04019	0.973676	3.12238	0.00179394	0.0352471	Up	0	0	5.78054	7.2468	1.72466	25.0542	15.8058	42.5908	4.76539	33.4319
HHLG10g0610	24.0862	2.6528	0.851612	3.11503	0.00183925	0.0359639	Up	13.1881	12.6901	0	7.2468	0	33.4056	47.4174	22.2213	62.9032	41.7899
HHLG3g0844	37.1953	2.15157	0.690872	3.11429	0.0018439	0.0360332	Up	30.4341	9.97082	0	9.96435	18.109	104.856	57.5783	62.9604	39.0762	39.0039
HHLG38g0544	9.50561	-3.19189	1.02713	-3.10757	0.00188629	0.0366569	Down	7.1013	20.8481	14.4514	21.7404	21.5583	3.71173	5.64493	0	0	0
HHLG43g0059	8.04911	-3.92745	1.26483	-3.10512	0.00190204	0.0368863	Down	32.4631	5.43863	8.67081	14.4936	14.6596	0	0	0	4.76539	0
MSTRG.9994	84.9839	-2.00451	0.646247	-3.10177	0.00192367	0.0371207	Down	301.298	106.96	42.3907	182.076	48.2905	59.3877	22.5797	23.1472	58.1378	5.57199
HHLG45g0666	6.16933	-4.27068	1.381	-3.09246	0.00198503	0.0380516	Down	24.3473	12.6901	3.8537	14.4936	3.44932	0	0	0	2.85924	0
MSTRG.7076	29.4145	-2.77596	0.899845	-3.08493	0.00203597	0.0388839	Down	53.767	39.8833	18.3051	101.455	43.1166	14.8469	15.8058	0	0	6.96498
HHLG50g0420	4.60578	-5.57351	1.80677	-3.08479	0.00203694	0.0388839	Down	9.13024	8.15794	0	24.4579	4.31166	0	0	0	0	0
HHLG35g0513	11.2757	3.26029	1.06178	3.07058	0.00213643	0.0403552	Up	0	3.62575	0	0	6.89865	21.3425	12.4188	42.5908	13.3431	12.537
MSTRG.27383	15.2236	2.82229	0.919362	3.06984	0.00214176	0.0403953	Up	4.05788	9.06438	5.78054	0	0	14.8469	60.9653	18.5178	18.1085	20.8949
HHLG16g0481	34.2983	2.82293	0.920835	3.06561	0.00217224	0.0409293	Up	0	0	15.4148	4.52925	22.4206	50.1084	123.059	63.8862	34.3108	29.2529
MSTRG.27755	21.7322	-2.51025	0.81931	-3.06386	0.002185	0.0410981	Down	28.4052	9.97082	83.8179	19.9287	43.1166	8.35139	0	15.7401	3.81232	4.17899
MSTRG.4180	9.78241	2.80161	0.914882	3.06226	0.00219669	0.0411844	Up	4.05788	5.43863	2.89027	0	0	16.7028	22.5797	11.1107	26.6862	8.35798
HHLG38g0014	4.84326	-5.6464	1.84637	-3.05811	0.0022274	0.0415748	Down	5.07235	15.4094	0	25.3638	2.58699	0	0	0	0	0
MSTRG.30173	31.7265	-3.07334	1.00562	-3.05615	0.002242	0.0417854	Down	42.6078	74.3279	79.9642	18.117	68.1242	0.927933	24.8377	0	0	8.35798
HHLG48g0240	13.778	2.28765	0.750188	3.04944	0.00229272	0.042542	Up	0	3.62575	4.81712	4.52925	10.348	42.6849	18.0638	25.9249	15.2493	12.537
MSTRG.1820	4.23562	-5.45261	1.78891	-3.04801	0.0023036	0.0426589	Down	9.13024	6.34507	9.63424	0	17.2466	0	0	0	0	0
MSTRG.29656	16.7426	2.11395	0.693616	3.04772	0.00230583	0.0426595	Up	4.05788	5.43863	7.70739	10.8702	3.44932	69.5949	10.1609	20.3695	19.0616	16.716
MSTRG.9122	21.4343	-3.92793	1.2892	-3.0468	0.0023129	0.0427068	Down	4.05788	37.164	65.5128	65.2212	28.4569	0	0	0	0	13.93
MSTRG.13589	75.61	2.22538	0.73039	3.04684	0.00231262	0.0427068	Up	24.3473	39.8833	0	15.3994	53.4645	123.415	247.248	99.9959	110.557	41.7899
MSTRG.28860	15.9792	-3.5923	1.17966	-3.04519	0.00232533	0.0429152	Down	3.04341	17.2223	23.1222	16.3053	87.9578	0	4.51594	0	7.62463	0
MSTRG.13013	28.0406	-3.02991	0.996147	-3.04164	0.00235297	0.0433196	Down	14.2026	149.562	16.3782	40.7632	29.3193	3.71173	0	7.4071	19.0616	0
MSTRG.3427	4.26795	5.64546	1.85802	3.03842	0.00237818	0.0436674	Up	0	0	0	0	0	0	4.51594	11.1107	22.8739	4.17899
MSTRG.28983	5.1248	-5.72628	1.88478	-3.03816	0.00238027	0.0436734	Down	20.2894	25.3803	3.8537	0	1.72466	0	0	0	0	0
HHLG11g0281	4.13595	-5.4184	1.78373	-3.03767	0.00238412	0.0437016	Down	7.1013	0	9.63424	9.96435	14.6596	0	0	0	0	0
MSTRG.7614	7.4205	3.9775	1.31395	3.02713	0.00246888	0.0448199	Up	0	0	0	0	4.31166	31.5497	9.03189	12.9624	3.81232	12.537
MSTRG.3452	54.4487	2.11241	0.69824	3.02534	0.00248356	0.0449575	Up	14.2026	12.6901	14.4514	22.6462	37.9426	9.27933	32.7406	101.848	59.0909	239.595
MSTRG.20955	213.852	-2.85018	0.943229	-3.02173	0.00251335	0.0453446	Down	22.3184	1347.87	64.5494	306.177	137.111	95.5771	33.8696	38.8873	26.6862	65.4708
HHLG6g0932	8.11247	-6.3902	2.11945	-3.01503	0.00256954	0.0461601	Down	0	67.0764	7.70739	6.34095	0	0	0	0	0	0
MSTRG.29805	9.39163	4.62609	1.53537	3.013	0.00258675	0.0463371	Up	0	3.62575	0	0	0	28.7659	14.6768	0	34.3108	12.537
MSTRG.9561	7.89701	-3.41014	1.13393	-3.00737	0.00263523	0.0469608	Down	9.13024	7.2515	7.70739	38.0457	10.348	2.7838	0	3.70355	0	0
HHLG19g0366	8.59833	4.53949	1.50998	3.00633	0.00264423	0.047085	Up	0	0	0	0	3.44932	14.8469	0	26.8507	17.1554	23.6809
MSTRG.48	951.705	-4.15441	1.3842	-3.0013	0.00268831	0.0476148	Down	4.05788	7732.82	97.3058	1106.04	70.7112	118.775	22.5797	134.254	43.8416	186.662
MSTRG.27414	4.46843	-5.53032	1.84325	-3.00031	0.00269706	0.0476632	Down	0	1.81288	17.3416	10.8702	14.6596	0	0	0	0	0
MSTRG.19153	66.83	3.00602	1.00216	2.99954	0.00270384	0.0477556	Up	6.08683	54.3863	13.4879	0	0	86.2977	200.96	183.326	27.6393	96.1168
MSTRG.29987	14.6346	-4.14837	1.38418	-2.99699	0.00272655	0.0480768	Down	4.05788	2.71931	28.9027	80.6206	22.4206	0	0	0	7.62463	0
MSTRG.2634	14.3148	3.80081	1.2686	2.99606	0.00273495	0.0481701	Up	0	0	9.63424	0	0	24.1262	22.5797	7.4071	18.1085	61.2918
MSTRG.17892	18.2165	-2.30539	0.769917	-2.99434	0.00275041	0.0483298	Down	15.2171	66.17	15.4148	39.8574	14.6596	6.49553	0	4.62944	8.57771	11.144
MSTRG.19139	143.271	-4.49731	1.50173	-2.99475	0.00274667	0.0483298	Down	4.05788	1167.49	10.5977	179.358	10.348	12.0631	0	18.5178	3.81232	26.4669
MSTRG.23340	85.4583	2.09363	0.699271	2.99402	0.00275328	0.0483352	Up	10.1447	39.8833	74.1836	20.8345	17.2466	25.0542	39.5145	129.624	375.513	122.584
MSTRG.16925	44.1696	2.20709	0.738689	2.98784	0.00280953	0.0489138	Up	0	23.5674	15.4148	14.4936	25.0076	128.983	133.22	30.5543	31.4516	39.0039
HHLG20g0140	9.4138	-4.51026	1.51022	-2.98648	0.00282205	0.049064	Down	16.2315	21.7545	26.9759	25.3638	0	0	0	0	3.81232	0
MSTRG.16812	10.2155	3.6998	1.23962	2.98463	0.00283921	0.0492356	Up	0	7.2515	0	0	0	30.6218	21.4507	19.4436	6.67155	16.716
MSTRG.27709	19.6924	-3.25208	1.09114	-2.98043	0.00287841	0.0497691	Down	51.738	43.509	26.9759	8.15265	47.4282	0	13.5478	0	0	5.57199

## Sheet: S5
Supplementary Table 5. The DEGs of Songpu mirror carp muscle under hypoxia stress
Row.names	baseMean	log2FoldChange	lfcSE	stat	pvalue	padj	change	MSPN1	MSPN2	MSPN3	MSPN4	MSPN5	MSPH1	MSPH2	MSPH4	MSPH5	MSPH6
MSTRG.891	7888.89	3.60015	0.179037	20.1084	6.23342e-90	2.47934e-85	Up	1462.11	1043.74	1358.91	943.439	1201.55	15916.5	15793.7	15789.7	14252.5	11126.8
MSTRG.31605	2389.21	6.45794	0.381072	16.9468	2.03354e-64	4.04419e-60	Up	35.6611	51.0101	39.1592	92.5577	49.9903	3086.03	1734.01	6883.24	6380.13	5540.27
MSTRG.13821	569.426	4.99314	0.315087	15.8469	1.47706e-56	1.95834e-52	Up	42.2303	30.4098	30.8274	32.4764	37.4927	1114	1608.3	924.614	1383.73	490.181
MSTRG.24419	7384.92	3.81369	0.249425	15.2899	8.92948e-53	8.87926e-49	Up	629.7	1116.34	1004.81	952.37	1199.77	11381.5	8782.8	19403.2	15676.3	13702.4
MSTRG.24956	13921	6.47844	0.42558	15.2226	2.50224e-52	1.99053e-48	Up	223.351	262.898	453.247	261.435	342.79	19323	64716.2	21783.9	23702.6	8140.4
MSTRG.9586	6895.99	2.7576	0.182887	15.0782	2.25391e-51	1.49415e-47	Up	1922.88	2202.26	1654.68	1726.93	1377.41	10670.3	10355.2	13119.9	10780	15150.3
MSTRG.2323	2113.13	7.86768	0.53597	14.6793	8.74486e-49	4.96895e-45	Up	7.5076	20.6002	38.326	15.4263	8.03415	2840.08	6337.42	7913.33	3119.46	831.135
MSTRG.4683	740.654	3.82837	0.269789	14.1902	1.05296e-45	5.23517e-42	Up	101.353	51.991	97.4813	96.6172	139.259	1188.56	1946.52	1431.44	1316.28	1037.03
MSTRG.4046	7463.83	3.7466	0.267971	13.9814	2.02565e-44	8.95226e-41	Up	753.575	1365.5	1056.46	1213.8	785.561	13071.9	8576.27	20808.6	15852.3	11154.2
MSTRG.30801	11229.9	7.34435	0.526309	13.9544	2.95593e-44	1.17572e-40	Up	56.307	76.5151	339.102	50.3384	164.254	16854.6	47315.2	19974.4	19790.6	7677.61
MSTRG.26452	21128.9	7.142	0.513845	13.8991	6.41143e-44	2.31831e-40	Up	152.029	131.449	665.706	94.9934	440.986	37881.4	80574.7	42577.5	33514.1	15256.1
MSTRG.25997	3773.08	5.22919	0.380462	13.7443	5.5099e-43	1.8263e-39	Up	116.368	154.992	334.936	271.99	100.873	7737.88	11739	7422.94	6578.26	3273.54
MSTRG.22653	794.438	6.51928	0.485533	13.427	4.19852e-41	1.28459e-37	Up	15.9537	39.2385	10.8313	12.9906	7.14147	1244.2	445.974	1706.77	2880.23	1581.05
MSTRG.13116	541.563	3.04678	0.228091	13.3577	1.06747e-40	3.03275e-37	Up	97.5988	129.487	136.641	113.667	107.122	909.226	1218.2	921.875	1169.8	612.018
MSTRG.26453	4023.34	7.07385	0.530527	13.3336	1.47515e-40	3.91159e-37	Up	18.769	50.0291	149.971	20.2977	57.1317	5948.36	16011.2	8039.35	7266.44	2671.91
MSTRG.3919	2235.24	3.12689	0.236674	13.2118	7.50099e-40	1.8647e-36	Up	527.409	372.766	382.427	393.776	619.522	4597.32	2638.93	5294.27	4071.1	3454.88
MSTRG.16465	7336.55	4.13035	0.314708	13.1244	2.38633e-39	5.5833e-36	Up	752.637	1370.41	639.878	456.293	744.498	12853.8	7776.11	18443	18151.9	12177.1
MSTRG.22638	1143.69	3.22457	0.250972	12.8483	8.78803e-38	1.94191e-34	Up	139.829	219.736	281.613	164.818	299.049	2147.86	1465.63	2475.23	1961.25	2281.84
MSTRG.24952	1186.3	7.22332	0.568435	12.7074	5.38073e-37	1.12641e-33	Up	8.44605	8.82867	30.8274	6.49528	24.1024	1650.41	6133.89	1362.95	2084.56	552.516
MSTRG.8631	2225.39	5.60862	0.445851	12.5796	2.73479e-36	5.43882e-33	Up	76.0145	108.887	65.8207	155.887	40.1707	2759.95	1163.32	6498.33	6822.76	4562.74
MSTRG.21747	2658.99	4.56342	0.363276	12.5619	3.42221e-36	6.48184e-33	Up	142.644	156.954	447.414	186.739	144.615	5703.53	6598.82	6118.89	4660.22	2430.13
MSTRG.14292	2236.53	2.86886	0.228522	12.554	3.78059e-36	6.83514e-33	Up	564.009	562.092	575.723	435.995	555.249	4105.43	5158.14	4898.4	3077.3	2432.96
MSTRG.25371	6754.87	4.90869	0.39147	12.5391	4.56085e-36	7.88729e-33	Up	182.059	425.738	791.515	584.575	191.927	12466.5	20250.4	12685.7	11730.6	8239.57
MSTRG.15501	480.201	2.74761	0.221135	12.425	1.91201e-35	3.16877e-32	Up	146.398	113.792	159.969	84.4386	117.834	710.019	799.162	871.192	1064.41	734.799
MSTRG.15283	4004.51	4.67223	0.379973	12.2962	9.49237e-35	1.51024e-31	Up	274.027	591.521	307.441	182.68	156.22	7086.84	4453.76	12958.3	8784.01	5250.32
MSTRG.7034	5219.67	4.64485	0.377913	12.2908	1.01475e-34	1.55238e-31	Up	426.995	368.842	327.437	483.898	399.029	8365.54	22389.5	6632.57	8994.78	3808.11
MSTRG.14223	16484.8	4.30056	0.354483	12.1319	7.15665e-34	1.05428e-30	Up	1532.49	2768.28	1480.55	935.32	1245.29	24748.3	16586.8	57053.5	34543.8	23953.7
MSTRG.8246	19938.7	4.03775	0.334358	12.0761	1.41188e-33	2.00563e-30	Up	928.127	3097.88	3416.85	2199.46	1800.54	32140.1	28322.9	56098.8	43818.9	27563.5
MSTRG.21993	971.826	-5.98523	0.499286	-11.9876	4.129e-33	5.66313e-30	Down	2655.81	1511.66	1723.84	2264.42	1412.22	27.8221	39.9082	2.7396	68.5016	11.3337
MSTRG.23188	1428.75	4.1157	0.346159	11.8896	1.34026e-32	1.77697e-29	Up	180.182	117.716	136.641	162.382	182.107	1926.4	2454.35	4679.23	3430.35	1018.14
MSTRG.7949	10279.9	2.28453	0.193978	11.7773	5.11323e-32	6.56061e-29	Up	3696.56	3647.22	3553.49	3297.98	3310.96	18916.8	17897.8	22957.8	13439	12081.7
MSTRG.8755	22129.6	4.44039	0.378986	11.7165	1.04905e-31	1.30394e-28	Up	791.113	2346.46	3367.69	1349.39	1888.92	32647.5	24675.2	75811.5	42689.1	35729.4
MSTRG.19366	395.083	2.50346	0.214014	11.6976	1.31038e-31	1.5794e-28	Up	100.414	113.792	147.472	95.8053	134.795	562.006	565.699	612.3	852.581	765.967
MSTRG.18770	823.634	2.48742	0.214067	11.6198	3.26751e-31	3.82251e-28	Up	330.334	216.793	232.456	194.858	272.268	1539.12	1699.09	1505.41	1228.81	1017.2
MSTRG.20634	1721.14	2.10855	0.182055	11.582	5.08728e-31	5.78133e-28	Up	472.979	588.578	645.71	874.427	657.015	2690.95	2592.04	2986.16	2646.27	3057.26
MSTRG.4197	617.809	5.17384	0.44772	11.556	6.88645e-31	7.60857e-28	Up	26.2766	29.4289	18.3298	30.0407	62.4878	1552.47	1373.84	1802.66	1009.61	272.952
MSTRG.11554	646.3	3.42954	0.300554	11.4107	3.69685e-30	3.97411e-27	Up	104.168	93.1915	114.978	82.0029	154.434	963.757	1564.4	1788.96	918.975	678.131
MSTRG.15117	276.533	3.83838	0.336955	11.3914	4.61657e-30	4.83221e-27	Up	23.4613	24.5241	39.9923	42.2193	49.9903	577.586	426.02	698.598	635.484	247.452
MSTRG.13857	8799.98	3.70393	0.326776	11.3348	8.82837e-30	8.95374e-27	Up	1176.82	571.901	1751.33	940.191	1830.89	14894.8	19390.4	23214	14411.7	9817.79
MSTRG.17516	1009.05	2.01559	0.177851	11.333	9.00439e-30	8.95374e-27	Up	408.226	342.356	394.091	513.127	341.898	1572.5	1764.94	1846.49	1617.69	1289.2
MSTRG.2206	2234.9	5.13211	0.454377	11.2948	1.39164e-29	1.35006e-26	Up	44.1072	100.058	61.6549	323.952	89.2683	4993.51	3263.49	5753.16	2653.65	5066.15
MSTRG.72	1781.49	3.54342	0.315323	11.2374	2.67056e-29	2.52908e-26	Up	203.644	294.289	354.099	215.968	339.22	3730.38	4872.79	2708.09	3740.19	1356.26
MSTRG.26014	2642.19	3.98035	0.354426	11.2304	2.89127e-29	2.67443e-26	Up	207.397	412.985	254.951	532.613	166.039	5377.45	2725.73	7239.39	5988.09	3517.21
MSTRG.5117	33581	3.81721	0.341948	11.1631	6.17858e-29	5.58529e-26	Up	4371.3	6690.17	4275.01	3935.33	2973.53	48798.8	23010.1	97458.5	78669.3	65627.6
MSTRG.24863	10146.7	5.07274	0.457173	11.0959	1.31366e-28	1.13589e-25	Up	160.475	1103.58	625.714	663.33	374.927	18596.3	9868.3	34120.3	26322.5	9631.72
MSTRG.21297	881.535	4.38519	0.395172	11.0969	1.29816e-28	1.13589e-25	Up	45.9841	135.373	61.6549	118.539	41.0634	1868.53	1491.57	2440.98	1930.69	680.964
MSTRG.25367	232.385	-3.46092	0.312971	-11.0583	1.99888e-28	1.65636e-25	Down	563.07	447.319	379.927	415.698	325.829	37.838	47.8899	13.698	54.8013	37.7789
MSTRG.31185	533.979	3.7517	0.340184	11.0284	2.78644e-28	2.26185e-25	Up	44.1072	83.3818	63.3212	124.222	53.561	1357.72	496.857	1264.32	1011.72	840.58
MSTRG.25341	3101.27	4.17074	0.379242	10.9976	3.92547e-28	3.12271e-25	Up	198.013	316.851	321.605	584.575	209.781	6159.81	2958.2	9914.61	7139.97	3209.32
MSTRG.2566	956.04	4.35551	0.397019	10.9705	5.29573e-28	4.05072e-25	Up	74.1376	79.458	85.8169	47.9027	158.005	1736.1	2237.85	2857.4	1710.43	573.294
MSTRG.12435	3855.75	2.81089	0.256186	10.9721	5.20738e-28	4.05072e-25	Up	1016.34	694.522	1249.76	785.116	1063.19	6518.16	3966.88	8261.26	9183.43	5818.89
MSTRG.7876	4598.66	2.59208	0.237206	10.9276	8.51046e-28	6.38686e-25	Up	998.511	1284.08	1725.5	1333.97	1198.87	7607.67	6722.54	12178.9	7262.22	5674.39
MSTRG.20535	280.573	3.93348	0.360816	10.9016	1.13223e-27	8.33972e-25	Up	57.2455	40.2195	16.6635	19.4858	39.2781	642.134	462.935	741.061	463.703	323.009
MSTRG.26944	1480.32	2.05788	0.189016	10.8874	1.32436e-27	9.57751e-25	Up	622.192	419.852	644.877	475.779	703.434	2480.62	2204.93	2876.58	2157.27	2217.62
MSTRG.30137	962.426	4.05852	0.373886	10.855	1.88861e-27	1.34142e-24	Up	137.014	99.0772	73.3193	137.213	98.1952	2406.05	2032.33	2936.85	1059.14	645.074
MSTRG.18791	211.27	2.68609	0.247559	10.8503	1.9876e-27	1.38696e-24	Up	60.9993	32.3718	50.8236	80.379	58.9171	350.558	351.192	345.189	429.979	352.288
MSTRG.4176	4918.08	3.69319	0.343563	10.7497	5.94865e-27	4.07944e-24	Up	538.67	977.039	987.311	487.146	539.181	10168.4	5999.2	16089.7	8768.2	4626.02
MSTRG.16817	9039.57	3.49111	0.325267	10.7331	7.11976e-27	4.79981e-24	Up	1069.83	2879.13	992.31	1069.28	1372.95	16470.7	9640.83	19027.9	21822.5	16050.4
MSTRG.28238	1673.15	2.36289	0.221532	10.6661	1.4659e-26	9.71772e-24	Up	547.116	545.415	584.055	586.199	459.732	2483.96	2130.1	4276.51	2968.75	2149.62
MSTRG.12886	162.705	2.63628	0.248785	10.5966	3.08916e-26	2.01428e-23	Up	40.3534	33.3527	49.1573	52.7741	49.0976	311.607	242.442	360.257	206.559	281.453
MSTRG.9204	504.109	2.12085	0.201089	10.5468	5.25632e-26	3.3721e-23	Up	231.797	189.326	155.804	221.651	143.722	792.373	967.774	917.765	713.47	707.409
MSTRG.21949	464.108	2.13584	0.203609	10.4899	9.61303e-26	5.97435e-23	Up	141.706	160.878	209.96	172.125	174.966	843.565	587.648	789.004	946.376	614.851
MSTRG.24818	241.473	2.57547	0.246106	10.4649	1.25203e-25	7.63477e-23	Up	91.0297	43.1624	69.1534	56.8337	86.5903	413.993	440.986	479.43	324.592	408.956
MSTRG.16962	1688.12	3.05205	0.291677	10.4638	1.26686e-25	7.63477e-23	Up	234.613	322.737	544.063	375.102	339.22	2830.06	1772.92	3882.01	4279.77	2300.73
MSTRG.22514	584.484	3.00966	0.289537	10.3947	2.62029e-25	1.55555e-22	Up	155.783	129.487	84.1506	129.906	146.4	1003.82	1238.15	1190.36	1288.88	477.903
MSTRG.19191	5038.18	3.15759	0.303968	10.3879	2.8149e-25	1.64651e-22	Up	1158.99	1261.52	1093.96	584.575	978.381	7585.41	4167.41	12318.6	12003.6	9229.38
MSTRG.13060	1098.98	3.29866	0.319752	10.3163	5.94572e-25	3.42741e-22	Up	189.567	86.3247	239.954	305.278	191.927	2065.51	3017.06	1942.38	1431.16	1520.6
MSTRG.14906	17089.8	3.44456	0.335009	10.282	8.49404e-25	4.82643e-22	Up	3034.01	4320.16	2823.63	1857.65	2341.51	27499.3	18310.9	55607	37161.6	17942.1
MSTRG.1726	292.587	-4.3291	0.422817	-10.2387	1.33007e-24	7.45123e-22	Down	853.99	422.795	559.06	361.3	590.956	28.935	22.9472	5.4792	55.8551	24.5563
MSTRG.14224	3135.13	3.94575	0.38547	10.2362	1.36484e-24	7.53978e-22	Up	344.411	658.226	338.269	219.216	350.825	4895.57	3056.97	11718.6	6509.76	3259.37
MSTRG.31041	113.715	7.9788	0.78047	10.2231	1.56295e-24	8.51595e-22	Up	4.69225	0	0	0	0	204.771	202.534	345.189	266.629	113.337
MSTRG.4477	28493.3	2.88775	0.28328	10.194	2.10981e-24	1.13402e-21	Up	7362.14	9829.25	5371.47	5712.6	5640.87	48624.1	24657.3	74232.2	52170.8	51332
MSTRG.1269	825.85	9.13118	0.899615	10.1501	3.31014e-24	1.75548e-21	Up	0	0	4.16587	3.24764	7.14147	1593.65	3003.09	1694.44	1715.7	237.062
MSTRG.23058	182.663	2.6228	0.258698	10.1384	3.72973e-24	1.95197e-21	Up	31.9073	57.8768	74.1525	35.724	55.3464	298.253	323.256	339.71	311.946	298.453
HHLG31g0005	66.0368	4.47841	0.444873	10.0667	7.7521e-24	4.00441e-21	Up	3.7538	7.8477	6.66539	6.49528	3.57073	136.885	147.66	108.214	175.996	63.2796
MSTRG.26548	307.488	2.21583	0.221362	10.01	1.37767e-23	7.02522e-21	Up	108.86	135.373	104.147	118.539	77.6634	547.539	544.747	609.561	456.326	372.122
HHLG32g0892	94.3208	5.26553	0.526898	9.99344	1.62829e-23	8.19813e-21	Up	0	8.82867	3.3327	8.1191	3.57073	205.883	180.585	238.345	217.097	77.4467
MSTRG.21430	456.839	2.08701	0.209098	9.98104	1.84515e-23	9.17388e-21	Up	146.398	230.526	188.297	189.175	116.049	704.455	670.458	776.676	830.45	715.91
MSTRG.29389	494.46	5.22112	0.52355	9.97254	2.01015e-23	9.87082e-21	Up	30.9689	17.6573	16.6635	32.4764	31.2439	881.404	1092.49	2113.6	599.652	128.448
MSTRG.22538	1379.62	2.52784	0.253707	9.96359	2.19975e-23	1.06701e-20	Up	447.641	350.204	592.387	277.673	370.464	1696.03	2082.21	3401.21	2334.32	2244.07
MSTRG.8030	3654.48	2.29746	0.231158	9.93892	2.81869e-23	1.35077e-20	Up	1541.87	1234.05	982.312	1009.2	1410.44	4316.87	4462.74	6881.87	6515.03	8190.46
MSTRG.31619	617.949	2.64133	0.265809	9.93696	2.87479e-23	1.36125e-20	Up	192.382	189.326	201.628	155.887	114.263	1141.82	812.132	1382.13	1345.79	644.13
MSTRG.10523	142.952	5.98	0.606114	9.86613	5.83727e-23	2.7315e-20	Up	11.2614	0	7.49856	0	3.57073	201.432	227.477	456.143	335.131	187.005
MSTRG.16355	1660.6	3.19992	0.325895	9.81889	9.33614e-23	4.31796e-20	Up	232.736	275.651	334.103	445.738	341.005	1822.9	1426.72	4714.85	3871.92	3140.37
MSTRG.11413	347.472	2.51612	0.256328	9.81603	9.60495e-23	4.39123e-20	Up	132.321	103.982	86.6501	74.6957	119.62	427.347	602.614	856.124	476.349	595.017
MSTRG.30998	2980.56	3.0965	0.317669	9.74757	1.88938e-22	8.53976e-20	Up	547.116	650.378	643.21	738.026	540.966	6679.53	6958	5146.34	6192.54	1709.49
MSTRG.19299	3077.09	4.43208	0.455832	9.72305	2.40466e-22	1.07467e-19	Up	69.4453	103.982	476.575	510.691	200.854	6165.37	5625.06	7112	6502.38	4004.56
MSTRG.18715	6687.49	6.92421	0.716487	9.66411	4.28322e-22	1.89295e-19	Up	36.5996	286.441	90.8159	49.5265	83.0195	8914.19	3562.81	32579.3	14337.9	6934.31
MSTRG.15900	883.429	2.24592	0.23269	9.65197	4.82181e-22	2.10755e-19	Up	248.689	201.097	354.932	336.942	395.459	1457.88	1378.83	1902.65	1457.5	1100.31
MSTRG.20698	2059.12	2.5698	0.266819	9.63125	5.90074e-22	2.55111e-19	Up	564.009	562.092	507.403	591.07	743.605	2673.15	5736.81	3855.98	3302.83	2054.23
MSTRG.26594	9885.82	4.30283	0.447645	9.61216	7.10425e-22	3.00608e-19	Up	340.657	2311.15	747.357	996.213	372.249	18302.5	11343.9	24733.1	22862.7	16848.4
MSTRG.27344	21402.6	2.52573	0.262748	9.61275	7.06369e-22	3.00608e-19	Up	6366.45	8854.17	4970.72	7130.19	4345.58	31888.6	22200.9	51879.8	37507.3	38882
MSTRG.4206	649.097	4.6795	0.48757	9.5976	8.18261e-22	3.39024e-19	Up	25.3382	28.4479	19.163	99.053	71.4147	1381.09	1742.99	1732.8	1041.22	349.455
MSTRG.8620	271.604	3.43759	0.358296	9.59426	8.45234e-22	3.4659e-19	Up	47.861	30.4098	69.9866	29.2287	51.7756	553.103	641.524	602.712	491.104	198.339
MSTRG.4273	928.727	-2.64615	0.276852	-9.558	1.2005e-21	4.87242e-19	Down	2241.96	1665.67	1470.55	1379.43	1250.65	189.19	362.167	234.236	340.4	153.004
MSTRG.26813	2779.24	2.01072	0.210631	9.54615	1.34604e-21	5.40796e-19	Up	1228.43	693.541	1153.95	1054.67	1394.37	4832.14	3702.48	4642.25	5286.21	3804.33
MSTRG.21540	379.818	2.19723	0.230773	9.52115	1.71269e-21	6.81221e-19	Up	113.552	107.906	187.464	144.52	125.868	594.28	840.068	634.217	482.673	567.628
MSTRG.5307	704.483	2.15711	0.227027	9.50153	2.06821e-21	8.06499e-19	Up	274.027	197.174	305.775	182.68	330.293	1083.95	855.033	1393.09	1148.72	1274.09
MSTRG.20111	1188.46	2.31897	0.244335	9.49093	2.2899e-21	8.75776e-19	Up	554.624	320.775	362.431	385.657	360.644	1570.28	2288.74	2551.94	1253.05	2236.51
HHLG14g0777	99.6595	3.45955	0.364694	9.48616	2.39698e-21	9.07999e-19	Up	8.44605	23.5431	26.6616	16.2382	8.03415	199.206	192.557	178.074	209.72	134.115
MSTRG.3309	2707.16	2.17539	0.229583	9.4754	2.65736e-21	9.97136e-19	Up	997.573	1200.7	744.024	1215.43	748.961	3702.56	4663.27	6177.79	4252.37	3368.93
MSTRG.7317	524.219	3.62938	0.383811	9.45615	3.19493e-21	1.18765e-18	Up	85.399	121.639	71.653	60.0813	53.561	972.66	339.22	789.004	1770.5	978.473
HHLG44g0410	121.355	2.72065	0.288358	9.43497	3.91106e-21	1.44039e-18	Up	31.9073	25.505	19.9962	34.1002	48.2049	242.609	187.569	256.152	173.889	193.617
MSTRG.11887	116.577	2.14732	0.229241	9.36708	7.45654e-21	2.72095e-18	Up	51.6148	31.3908	44.9914	47.0908	39.2781	215.899	167.614	191.772	174.943	201.173
MSTRG.22454	215.511	2.35256	0.251298	9.36163	7.85172e-21	2.83911e-18	Up	74.1376	74.5532	74.1525	47.0908	83.0195	337.204	385.114	486.279	249.767	343.788
MSTRG.4468	169.131	4.43218	0.473874	9.35308	8.5134e-21	3.0234e-18	Up	10.323	30.4098	3.3327	19.4858	11.6049	334.978	415.045	449.294	276.114	140.726
MSTRG.20050	2033.41	4.8181	0.515113	9.3535	8.47963e-21	3.0234e-18	Up	98.5373	274.67	124.976	98.241	99.9805	2505.1	720.343	9089.99	4965.84	2356.46
HHLG22g0507	95.8354	3.2007	0.342734	9.33871	9.75138e-21	3.40229e-18	Up	21.5844	20.6002	11.6644	25.9811	14.2829	164.707	226.479	121.912	225.528	125.615
MSTRG.14589	12190.6	2.44111	0.261604	9.33131	1.04573e-20	3.61687e-18	Up	2655.81	4034.7	4516.64	5187.29	2562	17487.8	15304.8	28415.1	24672.2	17069.4
MSTRG.6350	77.5421	7.18009	0.770117	9.32338	1.12694e-20	3.86415e-18	Up	2.81535	0	0	2.43573	0	124.643	95.7797	283.548	189.697	76.5022
MSTRG.29492	170.343	4.65348	0.499523	9.31585	1.20979e-20	4.11277e-18	Up	8.44605	11.7716	9.16491	19.4858	16.0683	178.061	610.596	538.331	107.495	204.006
MSTRG.27983	671.27	2.42483	0.260421	9.31118	1.26415e-20	4.26116e-18	Up	167.983	317.832	150.804	245.197	172.288	1300.96	764.242	1345.14	1013.82	1234.42
MSTRG.21249	90.4468	2.4592	0.264583	9.29465	1.47691e-20	4.93647e-18	Up	38.4765	29.4289	26.6616	24.3573	20.5317	129.094	175.596	163.006	152.811	144.504
MSTRG.25740	1110.69	2.02691	0.218099	9.29353	1.49256e-20	4.94722e-18	Up	368.811	544.434	383.26	440.055	451.698	1660.42	1168.31	2419.07	1934.91	1735.94
MSTRG.13688	1103.75	2.21437	0.238558	9.28234	1.65791e-20	5.40518e-18	Up	415.733	274.67	402.423	526.929	336.542	1962.01	1494.56	1288.98	2470.27	1865.33
MSTRG.2806	2677.24	3.79865	0.40933	9.28017	1.69204e-20	5.47161e-18	Up	228.982	419.852	613.216	316.645	216.029	5833.73	8928.46	5676.45	2637.84	1901.22
MSTRG.24909	1125.76	7.48572	0.807404	9.27135	1.83801e-20	5.89572e-18	Up	14.0768	7.8477	14.9971	22.7335	2.67805	1661.53	6837.27	980.776	1378.46	337.176
HHLG32g0216	56.0694	9.42052	1.02007	9.23518	2.57851e-20	8.07561e-18	Up	0	0	0	0	0	119.079	53.8761	117.803	180.212	89.7248
MSTRG.24118	8664.35	3.26109	0.353104	9.23548	2.57125e-20	8.07561e-18	Up	1065.14	714.141	2887.78	1959.14	1556.84	13078.6	19557	22472.9	13446.3	9905.62
MSTRG.19013	302.674	-2.37162	0.257355	-9.21536	3.10228e-20	9.64011e-18	Down	496.44	323.718	666.539	582.951	467.766	111.288	124.713	71.2296	80.0942	102.003
MSTRG.25063	214.013	-2.80931	0.304887	-9.21427	3.13402e-20	9.66323e-18	Down	521.778	272.708	374.095	418.133	287.444	46.7411	82.8095	32.8752	42.1548	61.3907
MSTRG.20434	76.765	3.50864	0.383836	9.141	6.18752e-20	1.87869e-17	Up	15.0152	8.82867	16.6635	10.5548	10.7122	94.5951	149.656	236.975	116.98	107.67
MSTRG.30736	370.567	3.79026	0.414903	9.13528	6.52382e-20	1.96579e-17	Up	55.3686	43.1624	56.6558	56.0218	38.3854	954.854	707.373	1032.83	616.514	144.504
MSTRG.15970	1495.84	2.50872	0.274894	9.12614	7.09828e-20	2.10697e-17	Up	569.639	554.244	260.783	426.252	424.917	2738.81	1547.44	3712.16	2346.97	2377.24
MSTRG.2611	800.032	4.89878	0.538195	9.10223	8.84928e-20	2.60726e-17	Up	114.491	60.8197	34.9933	41.4074	8.03415	1491.26	1721.04	2467.01	1687.25	374.011
MSTRG.23755	566.192	3.09389	0.342344	9.03737	1.60483e-19	4.65927e-17	Up	77.8914	104.963	155.804	181.056	73.2	1031.64	1128.4	1538.28	875.766	494.903
MSTRG.21225	1410.83	2.16711	0.239979	9.03039	1.71053e-19	4.93018e-17	Up	478.61	552.282	389.092	736.402	412.42	1888.56	2847.45	2980.68	2043.45	1779.38
MSTRG.15835	4802.85	4.20717	0.467071	9.00757	2.10666e-19	6.02822e-17	Up	633.454	1071.21	321.605	178.62	262.449	6850.91	3498.95	13956.9	13238.7	8015.73
MSTRG.28591	89.9835	10.1041	1.12189	9.00636	2.13017e-19	6.05196e-17	Up	0	0	0	0	0	110.175	501.846	123.282	120.141	44.3902
MSTRG.29187	386.279	3.53877	0.394304	8.97472	2.84084e-19	8.01377e-17	Up	71.3222	68.6674	79.1515	32.4764	54.4537	816.856	481.892	1283.5	716.632	257.841
MSTRG.14078	1335.18	3.25506	0.362991	8.96731	3.03835e-19	8.45107e-17	Up	183.936	500.291	147.472	260.623	174.073	2145.64	1221.19	3203.96	3219.57	2295.07
MSTRG.3716	3699.15	3.73206	0.416278	8.96531	3.09407e-19	8.54629e-17	Up	384.765	215.812	453.247	562.653	972.132	5025.78	9460.24	11835.1	5194.53	2887.25
MSTRG.26059	299.947	2.42785	0.270857	8.96358	3.14304e-19	8.62169e-17	Up	145.46	84.3628	104.147	75.5076	60.7025	572.022	575.676	562.987	461.595	357.01
MSTRG.4597	3379.31	2.61539	0.29185	8.9614	3.20586e-19	8.73376e-17	Up	485.179	1128.11	1298.08	1182.95	646.303	6245.5	7920.78	4981.96	5709.87	4194.4
MSTRG.15613	532.221	2.63375	0.294099	8.95532	3.38764e-19	9.16622e-17	Up	174.552	105.944	106.646	159.134	191.927	741.18	1029.63	1471.16	754.571	587.461
MSTRG.13557	2579.27	2.59938	0.290944	8.93429	4.09788e-19	1.10131e-16	Up	444.825	714.141	1066.46	954.806	472.229	3447.71	3300.41	5949.04	5425.33	4017.78
MSTRG.4214	177.817	4.28553	0.481351	8.90311	5.43012e-19	1.43035e-16	Up	18.769	15.6954	8.33174	25.9811	17.8537	426.234	363.165	556.138	276.114	69.8909
MSTRG.3875	641.054	3.76172	0.422609	8.90117	5.52595e-19	1.44602e-16	Up	89.1528	67.6864	104.147	112.044	66.9512	708.907	2984.14	943.792	601.76	731.966
MSTRG.18436	6716.9	4.082	0.459034	8.89259	5.9702e-19	1.55206e-16	Up	553.686	430.643	1854.64	471.719	433.844	11696.4	19685.7	17974.5	9416.33	4651.52
MSTRG.23427	189.42	-4.65289	0.524585	-8.86967	7.33648e-19	1.88264e-16	Down	571.516	257.993	363.264	326.388	303.512	6.6773	20.9518	0	31.6161	12.2781
MSTRG.11442	1062.45	2.87968	0.324842	8.86486	7.66015e-19	1.95309e-16	Up	287.166	231.507	330.77	161.57	259.771	1345.48	878.978	3057.39	1749.43	2322.46
MSTRG.16089	2642.87	2.95418	0.334232	8.83871	9.68331e-19	2.43768e-16	Up	514.271	646.455	469.077	730.719	659.693	3334.2	4341.02	7574.99	6368.54	1789.77
MSTRG.6626	1174.1	2.49906	0.283408	8.81789	1.1664e-18	2.91783e-16	Up	457.025	291.346	360.764	191.611	464.195	1574.73	1394.79	2494.4	1850.6	2661.52
MSTRG.28566	111.703	-2.76071	0.313717	-8.8	1.36815e-18	3.40115e-16	Down	254.32	204.04	170.801	213.532	130.332	32.2736	35.9174	30.1356	30.5622	15.1115
MSTRG.19727	6144.66	3.06707	0.348809	8.79297	1.45651e-18	3.59831e-16	Up	647.531	1119.28	1976.29	1786.2	1020.34	13690.7	13367.3	13541.8	9633.43	4663.8
MSTRG.6349	60.9076	9.53915	1.08583	8.78512	1.56193e-18	3.83491e-16	Up	0	0	0	0	0	141.336	33.922	182.183	194.966	56.6683
HHLG1g0547	151.819	2.24395	0.25597	8.76646	1.84377e-18	4.49915e-16	Up	46.9225	63.7626	36.6596	58.4575	58.9171	210.335	288.337	312.314	186.535	255.952
MSTRG.2753	1028.92	3.61787	0.412819	8.76382	1.88738e-18	4.57747e-16	Up	74.1376	101.039	135.807	240.325	223.171	2566.31	1864.71	2649.19	1880.1	554.405
MSTRG.92	383.633	-2.04249	0.234036	-8.72723	2.60981e-18	6.29122e-16	Down	584.654	593.483	701.532	803.79	403.493	166.932	167.614	132.871	168.619	113.337
MSTRG.22825	91.1217	7.13776	0.818783	8.71753	2.84344e-18	6.81313e-16	Up	2.81535	3.92385	0	0	0	195.867	179.587	367.106	122.249	39.6678
MSTRG.4209	102.121	4.40219	0.505225	8.71332	2.95096e-18	7.0284e-16	Up	5.6307	8.82867	6.66539	9.74291	15.1756	245.947	191.559	305.465	189.697	42.5012
MSTRG.12680	541.767	2.63388	0.30231	8.71252	2.97181e-18	7.03595e-16	Up	115.429	167.745	168.301	135.589	164.254	813.518	705.378	1771.15	720.847	655.463
MSTRG.12029	803.595	3.23957	0.374167	8.65809	4.79738e-18	1.12245e-15	Up	161.413	125.563	124.143	188.363	169.61	1483.47	1836.78	2331.4	1229.87	385.345
MSTRG.15451	348.913	3.26017	0.376947	8.64889	5.20008e-18	1.20252e-15	Up	34.7227	62.7816	64.1544	80.379	87.483	664.391	295.321	564.357	1198.25	437.29
MSTRG.5661	211.805	-3.15615	0.365538	-8.63425	5.91132e-18	1.35909e-15	Down	430.749	491.462	240.787	551.287	190.142	28.935	54.8738	42.4638	59.0167	28.3342
MSTRG.30857	149.56	2.20251	0.255349	8.6255	6.38143e-18	1.45874e-15	Up	42.2303	48.0672	55.8226	45.4669	74.9854	279.334	225.481	313.684	197.074	213.451
MSTRG.28564	250.95	-2.81601	0.328272	-8.57829	9.62939e-18	2.13972e-15	Down	514.271	456.148	313.273	587.822	326.722	26.7092	66.8463	50.6826	89.579	77.4467
MSTRG.2982	5130.56	2.86355	0.334041	8.57243	1.01321e-17	2.23892e-15	Up	1085.79	1233.07	1475.55	1410.29	992.664	7869.2	3815.22	15262.3	12457.8	5703.67
MSTRG.3812	252.532	3.68926	0.430987	8.56004	1.12832e-17	2.4795e-15	Up	6.56915	44.1433	46.6577	53.586	30.3512	534.184	358.176	723.254	447.895	280.508
MSTRG.21847	145.264	2.67833	0.3146	8.51345	1.68838e-17	3.68985e-15	Up	22.5228	42.1814	40.8255	42.2193	48.2049	284.898	298.314	338.34	162.296	172.838
MSTRG.6787	3845.8	2.26894	0.266851	8.50265	1.85316e-17	3.99496e-15	Up	1096.11	1842.25	1339.74	1218.68	1111.39	5997.33	3824.2	9621.47	7554.14	4852.7
MSTRG.7375	3872.7	3.08557	0.363372	8.49147	2.04043e-17	4.36334e-15	Up	579.024	1423.38	792.348	559.406	727.537	7101.31	2295.72	8668.09	9543.85	7036.32
MSTRG.21970	569.751	2.32835	0.274772	8.47376	2.37601e-17	5.05379e-15	Up	205.521	251.126	157.47	224.899	107.122	872.5	608.6	1179.4	1171.9	918.971
MSTRG.14945	152.741	3.06953	0.362807	8.4605	2.66233e-17	5.63267e-15	Up	25.3382	12.7525	23.3289	47.0908	53.561	290.463	269.38	347.929	204.451	253.118
MSTRG.9365	159.491	-2.87552	0.33998	-8.45793	2.72166e-17	5.72772e-15	Down	287.166	285.46	221.624	386.469	223.171	37.838	51.8807	27.396	56.909	17.0005
MSTRG.25343	6313.61	2.10192	0.248639	8.4537	2.82216e-17	5.90797e-15	Up	1892.85	1842.25	2270.4	3383.23	2538.79	10192.9	9978.05	15066.4	9200.29	6770.92
MSTRG.15981	416.491	2.3224	0.275432	8.43184	3.4028e-17	7.08619e-15	Up	135.137	172.649	106.646	100.677	179.429	721.148	511.823	542.44	1079.16	615.796
MSTRG.30695	2196.18	3.27513	0.388782	8.42409	3.63566e-17	7.5317e-15	Up	223.351	336.47	809.012	445.738	241.024	4415.92	4860.82	5466.87	3558.92	1603.71
HHLG35g0393	102.648	2.17868	0.259467	8.39677	4.58934e-17	9.36107e-15	Up	41.2918	30.4098	33.327	42.2193	38.3854	165.82	222.488	163.006	123.303	166.227
MSTRG.9640	7409.07	2.65899	0.317702	8.36945	5.78891e-17	1.17477e-14	Up	2950.49	2015.88	1657.18	893.912	2610.21	12028	9761.55	19684	13216.6	9272.82
MSTRG.13921	2572.45	-2.12688	0.25421	-8.36661	5.93008e-17	1.1973e-14	Down	5838.1	3785.54	3857.59	4209.75	3242.23	885.855	879.976	612.3	1492.28	920.86
MSTRG.6326	158.687	4.14519	0.497155	8.33783	7.56675e-17	1.5124e-14	Up	26.2766	16.6764	11.6644	8.1191	22.3171	412.88	134.69	586.274	260.306	107.67
MSTRG.6017	153.601	2.62706	0.315355	8.33048	8.0512e-17	1.60118e-14	Up	69.4453	29.4289	45.8246	48.7146	20.5317	271.544	230.47	232.866	306.676	280.508
MSTRG.892	50.8582	7.12578	0.856236	8.32221	8.63346e-17	1.70844e-14	Up	0	3.92385	0	0	0	105.724	106.754	132.871	51.6397	107.67
MSTRG.23809	2922.58	3.03105	0.364445	8.31688	9.03092e-17	1.77824e-14	Up	395.088	302.137	865.668	1195.13	426.703	5232.78	4830.89	7383.22	5199.8	3394.43
MSTRG.21559	951.921	2.47249	0.297432	8.3128	9.34738e-17	1.83149e-14	Up	420.426	360.013	242.454	191.611	239.239	1161.85	979.747	2346.47	1726.24	1851.16
MSTRG.13486	1001.84	2.53132	0.305313	8.29091	1.12386e-16	2.19126e-14	Up	195.198	287.422	308.274	281.733	404.386	1131.8	1141.37	2725.9	2271.09	1271.26
MSTRG.8004	635.511	-2.53653	0.306386	-8.27886	1.24362e-16	2.41294e-14	Down	894.343	912.295	1822.15	1046.55	745.391	268.205	125.711	175.334	132.788	232.34
MSTRG.14094	1085.89	4.1241	0.500255	8.24399	1.6656e-16	3.21598e-14	Up	38.4765	151.068	49.9904	267.93	81.2342	2428.31	2823.51	2834.11	1516.52	667.742
MSTRG.20291	248.8	2.81154	0.341173	8.24081	1.71051e-16	3.28674e-14	Up	26.2766	79.458	56.6558	68.2004	79.4488	420.67	498.853	587.644	447.895	222.895
MSTRG.13745	5698.18	2.05659	0.249731	8.23523	1.79207e-16	3.4269e-14	Up	2683.97	2100.24	1248.93	2378.08	2631.63	8086.21	9731.62	12511.7	9217.15	6392.19
MSTRG.4957	171.268	2.27163	0.2765	8.21566	2.10995e-16	3.99635e-14	Up	79.7683	43.1624	52.49	69.8242	48.2049	250.399	224.484	404.091	227.636	312.62
MSTRG.8595	130.504	2.33467	0.284335	8.211	2.19359e-16	4.13508e-14	Up	37.538	43.1624	39.9923	50.3384	44.6342	302.704	243.44	220.538	197.074	125.615
MSTRG.28966	192.085	-3.207	0.390795	-8.20635	2.28014e-16	4.27796e-14	Down	359.426	360.994	187.464	627.606	198.176	28.935	26.938	27.396	54.8013	49.1125
MSTRG.7962	230.609	2.41787	0.295422	8.18446	2.73519e-16	5.0601e-14	Up	61.9377	72.5913	43.325	80.379	105.337	344.994	558.715	391.763	392.04	255.007
MSTRG.16185	1907.69	3.6887	0.451282	8.17384	2.98731e-16	5.47559e-14	Up	94.7835	139.297	715.696	275.237	147.293	3133.88	4123.52	4365.55	2794.86	3286.76
MSTRG.523	1204.17	2.1079	0.258005	8.16997	3.08471e-16	5.62819e-14	Up	394.149	222.679	632.379	440.055	577.566	1759.47	2011.37	1861.56	1983.38	2159.06
MSTRG.15588	58.9166	-9.20365	1.12759	-8.1622	3.28979e-16	5.97494e-14	Down	216.782	92.2105	34.9933	209.473	35.7073	0	0	0	0	0
MSTRG.28812	453.529	3.26175	0.399709	8.16031	3.34152e-16	6.04132e-14	Up	70.3838	50.0291	59.9885	124.222	123.19	963.757	1059.56	1132.82	702.932	248.396
MSTRG.15435	1178.5	2.12546	0.260635	8.15494	3.49367e-16	6.28782e-14	Up	541.486	631.74	348.267	384.033	292.8	1824.02	1865.71	1301.31	2027.65	2568.02
MSTRG.29489	59.0599	6.54292	0.802545	8.15272	3.55837e-16	6.37542e-14	Up	0	3.92385	0	2.43573	0	151.352	117.729	189.032	95.9022	30.2231
HHLG2g0721	55.2606	3.03583	0.372762	8.14413	3.82008e-16	6.75305e-14	Up	7.5076	7.8477	11.6644	11.3667	21.4244	95.708	107.752	121.912	84.3096	83.1135
MSTRG.17525	928.449	2.34995	0.288534	8.14444	3.81047e-16	6.75305e-14	Up	286.227	373.747	363.264	357.24	141.937	1551.36	957.797	1612.25	2044.51	1596.16
MSTRG.5284	99.0343	-24.6176	3.0265	-8.13403	4.15254e-16	7.30828e-14	Down	323.765	0	0	666.578	0	0	0	0	0	0
MSTRG.4398	317.9	2.17127	0.267013	8.13168	4.2338e-16	7.41848e-14	Up	78.8298	178.535	119.977	103.113	97.3025	612.086	344.208	604.081	510.073	530.793
MSTRG.25694	198.11	5.35646	0.660032	8.11545	4.83992e-16	8.44333e-14	Up	14.0768	0	4.16587	4.87146	24.1024	578.699	659.483	384.914	137.003	173.783
HHLG48g0085	47.6782	7.02951	0.867726	8.10108	5.44743e-16	9.46163e-14	Up	0	3.92385	0	0	0	120.191	57.8669	112.324	120.141	62.3351
MSTRG.1722	696.994	3.16243	0.391497	8.07779	6.59506e-16	1.13558e-13	Up	133.26	61.8007	125.809	109.608	269.59	1559.15	1591.34	1398.56	1237.24	483.57
MSTRG.9986	433.556	2.21716	0.275901	8.03609	9.2747e-16	1.58327e-13	Up	262.766	111.83	117.478	139.648	135.688	638.795	751.272	957.49	649.184	571.405
MSTRG.15345	410.904	2.09971	0.261276	8.03637	9.25427e-16	1.58327e-13	Up	169.859	234.45	130.808	103.113	140.151	720.035	599.621	505.456	610.191	895.359
MSTRG.2755	158.335	4.34724	0.541449	8.02891	9.83431e-16	1.67162e-13	Up	9.3845	3.92385	10.8313	30.8526	18.7463	469.637	291.33	358.887	324.592	65.1686
MSTRG.12184	148.831	-2.89868	0.362092	-8.00536	1.19116e-15	2.01609e-13	Down	346.288	244.26	311.607	182.68	228.527	16.6932	27.9357	23.2866	48.478	58.5573
MSTRG.2777	295.492	3.92949	0.490977	8.0034	1.21029e-15	2.03979e-13	Up	22.5228	15.6954	23.3289	67.3885	52.6683	975.999	471.915	526.003	658.669	140.726
MSTRG.24418	399.467	10.1989	1.27634	7.99076	1.34111e-15	2.25075e-13	Up	0	0	0	3.24764	0	802.389	665.469	1260.22	1206.68	56.6683
MSTRG.17514	142.991	2.08226	0.260994	7.97818	1.48506e-15	2.48185e-13	Up	60.0608	48.0672	40.8255	75.5076	48.2049	214.786	220.493	297.246	251.875	172.838
MSTRG.1932	13300.7	8.00517	1.00457	7.96876	1.6027e-15	2.66726e-13	Up	23.4613	407.1	56.6558	16.2382	12.4976	15555.9	11622.3	66509.2	28200.5	10603.6
MSTRG.14281	7519.77	2.28132	0.288692	7.90226	2.73894e-15	4.53922e-13	Up	2790.95	3348.03	2255.4	2050.07	2385.25	10904	7088.7	20988.1	14577.1	8810.03
MSTRG.9127	1303.86	2.36673	0.29963	7.89884	2.81501e-15	4.6405e-13	Up	648.469	497.348	223.291	293.911	455.268	2136.74	1643.22	1639.65	2793.81	2706.86
MSTRG.25493	869.944	3.68294	0.466285	7.89847	2.82338e-15	4.6405e-13	Up	142.644	52.972	128.309	145.332	158.898	1805.1	2414.45	2384.82	1202.47	264.452
MSTRG.15097	1617.29	3.15905	0.400053	7.89659	2.86632e-15	4.69168e-13	Up	327.519	154.992	534.898	133.965	476.693	2390.47	3995.81	3605.31	3156.34	1396.87
MSTRG.8355	9714.2	2.14731	0.272091	7.89188	2.97674e-15	4.85245e-13	Up	3519.19	2939.95	5545.61	2646.01	3238.66	12871.6	19978	21938.7	9976.99	14487.3
MSTRG.28541	61.6393	3.98313	0.505999	7.87181	3.49551e-15	5.65179e-13	Up	3.7538	3.92385	8.33174	11.3667	8.92683	47.854	129.702	215.058	86.4174	101.058
HHLG9g1106	35.7306	4.79964	0.609842	7.8703	3.53784e-15	5.69706e-13	Up	0	3.92385	0	4.87146	3.57073	47.854	68.8417	64.3806	86.4174	77.4467
MSTRG.6058	280.965	2.70466	0.34388	7.86513	3.68711e-15	5.88975e-13	Up	80.7067	61.8007	54.9895	125.846	49.9903	646.585	671.456	464.362	403.632	250.285
MSTRG.29904	100.08	3.35191	0.426463	7.8598	3.8476e-15	6.12153e-13	Up	25.3382	13.7335	22.4957	8.1191	19.639	249.286	203.532	206.84	187.589	64.2241
MSTRG.15141	614.762	2.41984	0.310188	7.8012	6.13225e-15	9.60277e-13	Up	151.09	326.661	140.806	107.172	242.81	980.45	735.309	1353.36	1119.21	990.751
MSTRG.26839	323.571	2.52592	0.323975	7.79665	6.35717e-15	9.91595e-13	Up	67.5684	49.0481	117.478	122.598	121.405	475.201	874.988	553.399	475.296	378.733
MSTRG.26307	789.394	3.89863	0.500312	7.79238	6.57561e-15	1.02166e-12	Up	51.6148	61.8007	189.964	131.529	60.7025	1990.95	2806.54	1175.29	1122.37	303.175
MSTRG.23428	32.7597	-8.35702	1.07265	-7.79098	6.64903e-15	1.02905e-12	Down	110.737	27.467	41.6587	76.3195	71.4147	0	0	0	0	0
HHLG9g0473	25.0747	8.25846	1.0603	7.7888	6.76498e-15	1.04293e-12	Up	0	0	0	0	0	64.5472	22.9472	58.9014	59.0167	45.3346
MSTRG.12678	3343.36	2.39687	0.308511	7.76915	7.90143e-15	1.20877e-12	Up	827.713	1101.62	697.367	1871.45	836.444	4635.16	4477.7	8665.35	6265.26	4055.56
MSTRG.7550	4153.45	2.02899	0.261485	7.75952	8.52535e-15	1.29922e-12	Up	1861.89	1037.86	1618.86	1383.49	2271.88	5209.41	9892.25	7384.59	5764.67	5109.59
MSTRG.13901	109.831	5.8859	0.760915	7.73529	1.03167e-14	1.56026e-12	Up	0	4.90481	8.33174	4.87146	0	126.869	38.9105	419.159	358.316	136.948
MSTRG.14247	55.7956	-23.3544	3.02674	-7.71604	1.2e-14	1.80796e-12	Down	294.673	0	263.283	0	0	0	0	0	0	0
MSTRG.10370	187.947	-2.10526	0.27296	-7.7127	1.23187e-14	1.84897e-12	Down	228.043	269.765	230.789	453.857	342.79	53.4184	65.8485	69.8598	80.0942	85.0025
MSTRG.5137	3476.22	-3.14677	0.409206	-7.68995	1.47198e-14	2.20105e-12	Down	9736.42	6170.26	4535.8	6439.25	4354.51	418.444	1018.66	324.642	1410.08	354.177
MSTRG.15563	1341.13	2.57558	0.335184	7.68408	1.54106e-14	2.29571e-12	Up	402.595	437.509	237.455	511.503	337.434	1864.08	1210.22	3113.55	3833.98	1462.99
MSTRG.7716	615.146	3.00762	0.391552	7.68127	1.57518e-14	2.33779e-12	Up	69.4453	131.449	86.6501	310.961	81.2342	1302.07	739.3	1280.76	909.49	1240.09
MSTRG.4256	262.705	-3.2998	0.430411	-7.66662	1.76588e-14	2.61108e-12	Down	731.053	453.205	374.928	520.434	306.19	27.8221	75.8256	15.0678	88.5251	34.001
MSTRG.3678	73.2461	-4.62935	0.603996	-7.66454	1.79475e-14	2.64393e-12	Down	255.258	118.697	74.1525	193.234	62.4878	8.90307	8.97935	5.4792	5.26935	0
MSTRG.1748	3099.93	2.20337	0.287595	7.66136	1.83977e-14	2.69581e-12	Up	725.422	1469.48	720.695	1772.4	841.8	5586.67	4135.49	6281.9	5376.85	4088.62
MSTRG.31502	34.5394	-23.1907	3.02708	-7.6611	1.84352e-14	2.69581e-12	Down	0	0	76.652	268.742	0	0	0	0	0	0
MSTRG.361	2490.83	2.57273	0.336066	7.65542	1.92686e-14	2.80735e-12	Up	713.222	927.01	782.35	643.844	517.756	3251.84	1628.25	7280.48	5170.29	3993.23
MSTRG.21203	1555.9	2.08353	0.272487	7.64636	2.06746e-14	3.00122e-12	Up	491.748	544.434	445.748	1028.69	458.839	2429.42	2932.26	2914.93	2633.62	1679.27
MSTRG.30303	56.9734	6.28122	0.825167	7.61206	2.6976e-14	3.85961e-12	Up	4.69225	0	0	0	2.67805	158.029	127.706	154.787	100.118	21.7229
MSTRG.30549	43.674	23.0363	3.02705	7.61015	2.73772e-14	3.90297e-12	Up	0	0	0	0	0	0	0	278.069	0	158.671
MSTRG.2016	1247.71	2.95966	0.390392	7.58125	3.42241e-14	4.84436e-12	Up	167.983	168.726	452.413	455.481	175.859	1469.01	1093.48	3076.57	2357.51	3060.09
MSTRG.13887	96.5615	3.11332	0.4107	7.58054	3.44116e-14	4.85362e-12	Up	17.8306	38.2576	14.9971	8.1191	21.4244	179.174	208.52	115.063	241.336	120.892
MSTRG.14167	231.78	-3.22893	0.426246	-7.57526	3.58397e-14	5.03719e-12	Down	620.316	350.204	431.584	387.281	306.19	22.2577	62.8554	10.9584	77.9864	48.1681
MSTRG.28813	194.954	3.74002	0.494697	7.56023	4.02369e-14	5.61552e-12	Up	17.8306	14.7144	34.9933	35.724	32.1366	586.489	393.096	453.404	323.538	57.6128
MSTRG.1893	16378.9	2.08858	0.276599	7.55094	4.3214e-14	6.00991e-12	Up	5654.16	6519.48	8889.13	3359.68	6755.83	35319.6	26043.1	29108.2	26307.8	15832.2
MSTRG.25352	128.956	-4.31009	0.570862	-7.55014	4.34775e-14	6.0255e-12	Down	393.211	167.745	360.764	131.529	174.966	13.3546	9.97705	0	29.5084	8.50025
MSTRG.4252	26.6258	-22.8355	3.02734	-7.54308	4.59016e-14	6.33936e-12	Down	0	0	146.639	0	119.62	0	0	0	0	0
MSTRG.27899	1516.19	2.67595	0.354877	7.54051	4.68136e-14	6.44294e-12	Up	386.641	134.392	559.06	324.764	646.303	2216.86	3883.07	2590.29	2105.63	2314.9
MSTRG.27900	391.893	-2.62664	0.348533	-7.53628	4.83555e-14	6.63221e-12	Down	622.192	438.49	699.866	1218.68	393.673	95.708	87.7981	117.803	73.7709	170.949
MSTRG.4315	3279.94	3.0507	0.405377	7.52557	5.24894e-14	7.14988e-12	Up	508.64	319.794	1272.26	790.8	640.054	6106.39	10231.5	5716.17	5149.21	2064.62
MSTRG.23677	605.101	-2.35313	0.313348	-7.50963	5.92927e-14	8.02166e-12	Down	1488.38	1059.44	986.478	876.05	650.766	156.917	200.539	139.72	351.993	140.726
HHLG28g0218	40.1706	7.2261	0.962625	7.50666	6.06567e-14	8.17837e-12	Up	0	0	0	0	2.67805	103.498	50.883	83.5577	50.5858	110.503
MSTRG.26455	133.949	5.47043	0.729337	7.50055	6.35489e-14	8.51063e-12	Up	0	0	2.49952	8.1191	18.7463	259.302	408.061	342.45	190.751	109.559
MSTRG.6470	74.5804	4.32941	0.577775	7.49324	6.71953e-14	8.96877e-12	Up	3.7538	15.6954	6.66539	4.05955	5.3561	95.708	125.711	319.163	124.357	45.3346
MSTRG.18978	53.2985	-2.78992	0.37403	-7.45909	8.71225e-14	1.1551e-11	Down	118.245	90.2486	97.4813	86.8743	73.2	22.2577	11.9725	8.21879	8.43096	16.056
MSTRG.17099	1813.44	2.76497	0.372147	7.42977	1.08784e-13	1.43274e-11	Up	307.812	226.602	1045.63	336.131	408.849	3451.05	3068.94	4134.05	2951.89	2203.45
MSTRG.31412	29.379	22.4838	3.02747	7.42659	1.1143e-13	1.46275e-11	Up	0	0	0	0	0	0	0	172.595	121.195	0
MSTRG.6573	76.8583	-2.9286	0.394851	-7.41698	1.19822e-13	1.56259e-11	Down	201.767	105.944	151.638	110.42	109.8	20.0319	14.9656	10.9584	32.67	10.3892
HHUNg1010	33.959	5.95878	0.804472	7.40707	1.2912e-13	1.67289e-11	Up	1.8769	0	0	0	3.57073	62.3215	73.8302	95.8859	73.7709	28.3342
MSTRG.17394	95.1663	2.76646	0.375679	7.36389	1.78621e-13	2.27713e-11	Up	31.9073	20.6002	26.6616	8.1191	34.8146	183.626	182.58	205.47	109.603	148.282
MSTRG.17506	4187.76	-2.90267	0.39537	-7.34165	2.10977e-13	2.66811e-11	Down	8555.85	7270.9	8587.52	6188.37	6336.27	500.797	1139.38	430.117	2238.42	629.963
MSTRG.21319	761.751	3.90342	0.531919	7.33838	2.16187e-13	2.72115e-11	Up	62.8762	133.411	117.478	125.846	37.4927	1558.04	126.709	1625.95	1782.1	2047.62
MSTRG.5240	4096.69	2.06363	0.281432	7.3326	2.25736e-13	2.83238e-11	Up	878.389	1426.32	2107.93	2107.72	1387.23	7044.55	9167.91	4990.18	7330.72	4525.91
MSTRG.2512	77.2923	-2.63694	0.359792	-7.32907	2.31756e-13	2.89878e-11	Down	153.906	113.792	178.299	147.768	72.3073	13.3546	29.9312	20.547	23.1852	19.8339
MSTRG.13487	303.168	2.39507	0.327248	7.31883	2.50148e-13	3.119e-11	Up	74.1376	133.411	109.146	75.5076	91.9464	434.024	330.24	868.453	605.976	308.842
MSTRG.6683	675.273	2.27028	0.310683	7.3074	2.72366e-13	3.38543e-11	Up	121.06	190.307	319.939	176.996	350.825	864.71	983.737	1324.6	890.521	1530.04
MSTRG.17908	237.487	2.42144	0.331805	7.29779	2.92538e-13	3.60238e-11	Up	31.9073	72.5913	99.9809	82.8148	85.6976	426.234	240.447	584.904	413.117	337.176
MSTRG.10092	100.625	2.50078	0.343685	7.27637	3.42917e-13	4.19678e-11	Up	27.2151	51.991	24.9952	17.862	29.4585	196.98	105.757	217.798	162.296	171.894
MSTRG.29926	163.278	3.64367	0.5016	7.26408	3.75582e-13	4.55451e-11	Up	40.3534	1.96193	38.326	18.6739	21.4244	316.059	408.061	382.174	232.905	172.838
MSTRG.27327	1619.87	2.438	0.335851	7.25917	3.89477e-13	4.70865e-11	Up	424.179	244.26	878.165	288.228	688.259	3021.48	2359.57	3512.16	2243.69	2538.74
MSTRG.1822	1165.67	-3.47553	0.479264	-7.25182	4.11216e-13	4.9564e-11	Down	1260.34	2497.53	2645.33	1773.21	2519.15	86.8049	73.8302	227.387	80.0942	493.014
MSTRG.14684	924.381	2.70746	0.373953	7.24009	4.48372e-13	5.37168e-11	Up	212.09	462.034	127.476	284.98	141.044	1235.3	960.79	2371.12	2126.71	1322.26
MSTRG.13900	268.724	4.35086	0.601	7.23936	4.50792e-13	5.38446e-11	Up	19.7075	51.991	22.4957	24.3573	7.14147	419.557	67.844	1017.76	805.157	251.23
HHLG25g0564	113.422	2.38931	0.331117	7.2159	5.35787e-13	6.34254e-11	Up	22.5228	44.1433	40.8255	25.1692	49.0976	232.593	215.504	239.715	120.141	144.504
MSTRG.14797	84.9965	2.37069	0.32919	7.20159	5.95154e-13	7.00363e-11	Up	20.6459	24.5241	19.9962	47.0908	24.9951	139.11	151.651	160.266	164.404	97.2806
MSTRG.17907	389.539	2.44344	0.339471	7.19779	6.11965e-13	7.15909e-11	Up	60.0608	111.83	186.631	113.667	132.117	730.051	384.117	1075.29	558.551	543.071
MSTRG.17728	135.64	-3.79964	0.528296	-7.19227	6.37246e-13	7.43298e-11	Down	300.304	367.861	149.138	345.062	103.551	4.45153	37.9128	12.3282	26.3468	9.44472
MSTRG.26454	54.5376	5.41468	0.752907	7.1917	6.39895e-13	7.44205e-11	Up	1.8769	1.96193	3.3327	0	5.3561	107.95	197.546	119.173	95.9022	12.2781
MSTRG.13589	215.35	2.5493	0.354652	7.18816	6.56709e-13	7.61534e-11	Up	47.861	71.6103	64.1544	41.4074	89.2683	273.769	159.633	447.924	538.528	419.346
MSTRG.14132	56.9969	-3.59998	0.501114	-7.18396	6.77187e-13	7.82998e-11	Down	107.922	143.221	56.6558	166.441	52.6683	8.90307	7.98164	6.849	4.21548	15.1115
MSTRG.29523	126.041	3.39904	0.473223	7.18273	6.83318e-13	7.87796e-11	Up	7.5076	7.8477	40.8255	19.4858	33.0293	296.027	193.555	234.236	309.838	118.059
MSTRG.15740	3677.52	3.67737	0.512442	7.17616	7.16975e-13	8.24211e-11	Up	436.379	1398.85	357.432	207.037	266.912	4552.81	2182.98	12176.1	8908.37	6288.29
MSTRG.20661	146.42	-2.97568	0.414844	-7.17301	7.33657e-13	8.40957e-11	Down	423.241	211.888	225.79	233.018	205.317	12.2417	27.9357	28.7658	69.5555	26.4452
MSTRG.4493	8859.75	-3.07094	0.428665	-7.16396	7.83815e-13	8.93302e-11	Down	24218.6	16167.2	10777.9	17639.5	10373	1264.24	3199.64	632.847	3354.47	969.973
MSTRG.3140	57.6085	5.41359	0.75649	7.15619	8.29471e-13	9.42635e-11	Up	0	4.90481	4.16587	4.05955	0	134.659	29.9312	194.511	162.296	41.5568
MSTRG.28700	427.071	2.70183	0.377711	7.15317	8.47964e-13	9.60906e-11	Up	52.5532	110.849	201.628	118.539	84.8049	643.247	386.112	1275.28	690.285	707.409
MSTRG.15902	56.1129	2.95521	0.413411	7.14835	8.78244e-13	9.90697e-11	Up	8.44605	12.7525	8.33174	22.7335	11.6049	129.094	73.8302	79.4483	141.219	73.6688
MSTRG.16132	180.281	2.7113	0.379339	7.14742	8.84218e-13	9.90697e-11	Up	59.1224	39.2385	30.8274	68.2004	41.0634	314.946	281.353	595.863	191.804	180.394
MSTRG.2567	105.984	4.32621	0.605801	7.14129	9.24563e-13	1.03299e-10	Up	0	3.92385	19.9962	6.49528	19.639	149.126	225.481	282.179	243.444	109.559
MSTRG.15436	1026.64	2.16518	0.303364	7.13723	9.52309e-13	1.06101e-10	Up	448.579	230.526	491.573	359.676	341.005	2004.3	831.088	1750.6	1346.85	2462.24
MSTRG.11254	78.9949	2.50431	0.350924	7.13633	9.58567e-13	1.065e-10	Up	32.8458	25.505	14.9971	22.7335	22.3171	114.627	148.658	212.319	104.333	91.6138
MSTRG.1170	4592.22	2.9025	0.407068	7.13024	1.00195e-12	1.1101e-10	Up	1418.94	322.737	1138.95	526.117	2010.32	7065.7	10446	10357.1	5908	6728.42
MSTRG.1706	191.93	3.46901	0.488375	7.10316	1.21938e-12	1.34352e-10	Up	7.5076	19.6193	41.6587	49.5265	40.1707	300.478	121.72	608.191	431.033	299.398
MSTRG.26514	3078.97	-2.91466	0.410532	-7.09971	1.25018e-12	1.36986e-10	Down	9049.47	4750.8	3846.76	5712.6	3825.15	342.768	756.261	569.836	1591.34	344.732
MSTRG.9588	445.52	3.464	0.488197	7.0955	1.28886e-12	1.40836e-10	Up	131.383	85.3438	26.6616	96.6172	30.3512	764.551	1184.28	936.943	996.961	202.117
MSTRG.19418	154.722	-4.00059	0.565372	-7.07603	1.4834e-12	1.60769e-10	Down	195.198	426.719	96.6482	593.506	143.722	7.79018	18.9564	27.396	31.6161	5.66683
MSTRG.3240	164.928	2.19211	0.311224	7.0435	1.87465e-12	2.00441e-10	Up	105.106	51.0101	51.6568	32.4764	56.239	222.577	236.456	324.642	278.222	290.897
MSTRG.2488	216.561	-2.96245	0.420865	-7.03896	1.93676e-12	2.06527e-10	Down	273.089	361.975	560.726	368.607	355.288	64.5472	45.8944	43.8336	9.48483	82.1691
MSTRG.1757	35.7891	-2.9194	0.416019	-7.01746	2.25935e-12	2.39005e-10	Down	61.9377	76.5151	46.6577	80.379	50.8829	10.0159	6.98394	5.4792	10.5387	8.50025
MSTRG.7346	77.1058	2.26634	0.323495	7.0058	2.45578e-12	2.59094e-10	Up	26.2766	30.4098	33.327	21.1096	21.4244	103.498	97.7751	175.334	166.512	95.3917
MSTRG.21474	2422.33	2.89558	0.413363	7.00494	2.47086e-12	2.59996e-10	Up	312.504	229.545	1252.26	513.939	560.605	3856.14	4079.62	6870.91	4219.7	2328.12
MSTRG.26463	72.3103	4.8824	0.697292	7.00194	2.52445e-12	2.64934e-10	Up	7.5076	3.92385	0	12.1786	0	131.32	74.8279	246.564	139.111	107.67
MSTRG.28819	59.0744	7.31461	1.04577	6.99446	2.66286e-12	2.78725e-10	Up	0	3.92385	0	0	0	70.1116	180.585	269.85	37.9393	28.3342
MSTRG.17287	3717.49	2.47488	0.354464	6.98203	2.90947e-12	3.01365e-10	Up	548.055	669.998	2002.12	1420.84	1025.69	5754.72	3681.53	9429.7	6719.48	5922.78
MSTRG.418	223.063	2.61219	0.375131	6.96341	3.32128e-12	3.42238e-10	Up	80.7067	67.6864	41.6587	60.8932	62.4878	480.766	218.497	728.733	263.468	225.729
MSTRG.1312	302.705	-2.67499	0.38418	-6.96286	3.3343e-12	3.42692e-10	Down	788.298	565.035	429.085	422.193	413.312	50.0797	73.8302	43.8336	178.104	63.2796
MSTRG.24245	951.078	2.40839	0.346017	6.96033	3.39473e-12	3.48004e-10	Up	168.921	148.125	460.745	480.65	248.166	1430.05	1969.47	1910.87	1620.85	1072.92
MSTRG.24213	329.258	-2.14707	0.308771	-6.95359	3.56113e-12	3.63266e-10	Down	692.576	611.14	677.37	415.698	290.122	75.6761	127.706	95.8859	167.565	138.837
MSTRG.19208	11807.1	2.26052	0.325139	6.95247	3.58938e-12	3.65135e-10	Up	2976.76	4378.04	3888.42	2978.08	6164.87	18835.5	10577.7	29980.8	26690.3	11600
MSTRG.28350	263.01	2.68778	0.387261	6.94048	3.9078e-12	3.945e-10	Up	54.4301	64.7435	125.809	35.724	72.3073	403.977	263.394	809.551	493.211	306.953
MSTRG.3362	14889	3.40582	0.491108	6.93498	4.06287e-12	4.07055e-10	Up	4561.81	800.466	1027.3	1100.14	5347.17	21949.4	25404.6	44363.7	26097	18238.7
MSTRG.12415	417.386	3.14399	0.453339	6.93519	4.05672e-12	4.07055e-10	Up	46.9225	54.9339	44.1582	186.739	91.0537	1021.63	1084.51	353.408	904.221	386.289
MSTRG.4191	70.8994	5.49787	0.793611	6.92766	4.27851e-12	4.27582e-10	Up	0	0	7.49856	4.87146	2.67805	234.818	118.727	213.689	110.656	16.056
MSTRG.21004	194.735	-2.33025	0.336886	-6.91704	4.61184e-12	4.5859e-10	Down	244.935	158.916	299.943	402.707	517.756	48.9669	86.8004	69.8598	57.9629	59.5017
MSTRG.10647	530.689	-2.54254	0.368272	-6.90398	5.05671e-12	5.00325e-10	Down	1290.37	842.647	823.176	977.539	596.312	90.1435	204.53	97.2557	296.138	88.7804
MSTRG.18543	95.0876	2.98996	0.433533	6.89672	5.32153e-12	5.25221e-10	Up	7.5076	32.3718	20.8293	36.5359	8.92683	202.545	219.495	142.459	151.757	128.448
MSTRG.18194	56.0099	4.30188	0.626098	6.87093	6.37826e-12	6.24865e-10	Up	8.44605	2.94289	0	3.24764	12.4976	79.0147	59.8623	182.183	130.68	81.2246
MSTRG.27585	34.8593	20.732	3.02727	6.84842	7.46679e-12	7.24909e-10	Up	0	0	0	0	0	186.964	161.628	0	0	0
MSTRG.10672	288.811	2.60147	0.37987	6.84832	7.47235e-12	7.24909e-10	Up	69.4453	125.563	109.979	34.1002	69.6293	381.719	254.415	791.744	521.666	529.849
MSTRG.19827	199.626	2.05815	0.300512	6.84882	7.44591e-12	7.24909e-10	Up	42.2303	63.7626	72.4861	85.2505	122.298	309.382	255.413	408.2	379.393	257.841
MSTRG.5900	65.4069	-2.58264	0.377171	-6.84738	7.52125e-12	7.27878e-10	Down	121.06	82.4009	94.9818	179.432	83.0195	23.3705	17.9587	13.698	12.6464	25.5007
MSTRG.21933	7645.02	3.18081	0.464629	6.84591	7.59916e-12	7.33632e-10	Up	1695.78	2617.21	1376.4	609.744	1294.39	11586.2	4199.34	31217.7	13958.5	7894.84
MSTRG.15185	1052.21	2.73964	0.400561	6.83951	7.94671e-12	7.65328e-10	Up	147.337	360.994	336.602	138.837	386.532	2182.36	1057.57	2010.87	3087.84	813.19
MSTRG.27226	220.906	2.22941	0.326097	6.83665	8.10686e-12	7.76989e-10	Up	72.2607	85.3438	122.477	63.3289	44.6342	370.59	218.497	487.648	282.437	461.847
MSTRG.3258	403.803	2.18427	0.32047	6.81583	9.37202e-12	8.93938e-10	Up	64.7531	243.279	99.9809	143.708	176.751	775.68	551.731	741.061	682.908	558.183
MSTRG.15663	78.7774	2.31105	0.339229	6.81264	9.58247e-12	9.11825e-10	Up	33.7842	23.5431	31.6606	13.8025	29.4585	92.3693	108.75	145.199	185.481	123.726
MSTRG.1308	267.979	-2.66852	0.391858	-6.80993	9.76466e-12	9.26499e-10	Down	663.484	394.347	308.274	703.926	246.381	51.1926	89.7935	34.245	120.141	68.002
MSTRG.29959	140.166	-2.03611	0.299004	-6.80966	9.78328e-12	9.26499e-10	Down	176.429	268.784	189.964	196.482	296.371	37.838	65.8485	42.4638	45.3164	82.1691
MSTRG.25741	77.5281	4.71243	0.692106	6.80883	9.83968e-12	9.29627e-10	Up	13.1383	3.92385	2.49952	8.931	0	234.818	30.9289	231.496	147.542	102.003
MSTRG.3507	115.014	4.22151	0.620205	6.80664	9.99038e-12	9.39403e-10	Up	13.1383	0	4.99904	17.862	22.3171	291.575	178.589	302.726	251.875	67.0575
MSTRG.2565	400.531	-3.04742	0.448076	-6.80112	1.03812e-11	9.73852e-10	Down	1054.82	604.273	688.202	634.913	591.849	51.1926	173.601	23.2866	135.949	47.2236
MSTRG.26146	33.3324	6.21976	0.915669	6.79258	1.10143e-11	1.02839e-09	Up	0	0	1.66635	0	2.67805	43.4024	73.8302	98.6255	98.01	15.1115
MSTRG.14961	163.657	-2.11219	0.311032	-6.79092	1.11417e-11	1.03543e-09	Down	386.641	216.793	287.445	238.701	200.854	67.8859	67.844	27.396	67.4477	75.5577
MSTRG.6388	613.131	2.54937	0.375559	6.78819	1.13548e-11	1.05032e-09	Up	144.521	294.289	198.295	91.7458	166.039	790.147	421.032	1378.02	1581.86	1065.36
MSTRG.7013	32.5119	-3.23508	0.47678	-6.78526	1.15874e-11	1.06441e-09	Down	63.8146	70.6293	36.6596	65.7647	57.1317	3.33865	5.98623	5.4792	11.5926	4.72236
MSTRG.11904	86.125	2.0919	0.308459	6.78177	1.18714e-11	1.08799e-09	Up	26.2766	29.4289	49.9904	30.8526	26.7805	146.901	91.7889	147.938	132.788	178.505
MSTRG.26712	42.1206	6.91947	1.02089	6.77787	1.21959e-11	1.11515e-09	Up	0	0	0	3.24764	0	149.126	56.8692	94.5161	103.279	14.1671
HHLG31g0388	51.5856	-3.20221	0.472554	-6.77639	1.23213e-11	1.12404e-09	Down	105.106	110.849	113.312	66.5766	69.6293	10.0159	8.97935	5.4792	22.1313	3.77789
MSTRG.10567	36.7335	-6.83089	1.01039	-6.76066	1.37367e-11	1.24744e-09	Down	138.891	31.3908	59.1553	61.7051	73.2	0	2.99312	0	0	0
HHLG34g0556	148.124	2.64185	0.391194	6.75331	1.44505e-11	1.30927e-09	Up	31.9073	69.6484	64.9876	19.4858	18.7463	203.658	227.477	310.944	252.929	281.453
MSTRG.11145	490.151	2.5859	0.384609	6.72346	1.77463e-11	1.57557e-09	Up	200.828	48.0672	181.632	85.2505	183.893	1279.82	802.155	865.713	472.134	782.023
MSTRG.8949	505.433	-3.49771	0.52086	-6.71526	1.87736e-11	1.65938e-09	Down	1250.95	962.325	673.204	1087.96	669.512	57.8699	111.743	10.9584	193.912	35.8899
MSTRG.31021	1273.02	-2.43333	0.362443	-6.71368	1.89777e-11	1.6737e-09	Down	1329.78	1079.06	2282.06	2006.23	4044.75	634.343	411.055	249.303	303.515	390.067
MSTRG.341	142.113	2.83029	0.422657	6.69642	2.13591e-11	1.8754e-09	Up	50.6763	43.1624	39.1592	22.7335	19.639	290.463	97.7751	260.262	431.033	166.227
MSTRG.12965	3546.1	2.49721	0.3731	6.69313	2.18446e-11	1.91381e-09	Up	1728.63	551.301	1600.53	456.293	998.913	4716.4	3719.45	8424.26	6096.64	7168.54
MSTRG.15450	98.0269	2.73046	0.408801	6.6792	2.40251e-11	2.08646e-09	Up	24.3997	27.467	15.8303	37.3478	23.2098	213.674	89.7935	171.225	286.653	90.6693
HHLG11g0112	38.8155	4.52966	0.678549	6.67552	2.46364e-11	2.13489e-09	Up	5.6307	3.92385	6.66539	0	0	91.2564	60.86	36.9846	105.387	77.4467
MSTRG.10279	116.064	2.06042	0.309335	6.66079	2.72356e-11	2.34988e-09	Up	41.2918	56.8958	44.1582	35.724	46.4195	137.998	108.75	254.783	238.175	196.45
MSTRG.31033	158.443	2.76298	0.415075	6.6566	2.80239e-11	2.40745e-09	Up	46.9225	16.6764	53.3231	18.6739	67.8439	221.464	445.974	226.017	192.858	294.675
MSTRG.12821	894.379	2.24345	0.337331	6.65058	2.91932e-11	2.49712e-09	Up	311.565	406.119	242.454	390.528	208.888	1080.61	603.612	1676.63	1746.26	2277.12
MSTRG.28625	17.811	7.76386	1.17086	6.6309	3.33642e-11	2.8356e-09	Up	0	0	0	0	0	60.0957	21.9495	46.5732	40.0471	9.44472
MSTRG.12468	319.786	3.13441	0.473257	6.62307	3.51826e-11	2.98377e-09	Up	75.076	121.639	44.9914	17.862	67.8439	377.267	196.548	824.619	769.325	702.687
MSTRG.24523	733.206	2.4249	0.366574	6.61502	3.71497e-11	3.14373e-09	Up	110.737	168.726	340.768	258.999	271.376	1630.37	1132.4	901.328	1941.23	576.128
MSTRG.4314	3389.58	2.75613	0.417238	6.60566	3.95754e-11	3.32793e-09	Up	565.885	400.233	1703.01	958.865	741.82	6392.4	10134.7	6046.29	4825.67	2126.95
MSTRG.30079	95.917	2.73389	0.414431	6.59672	4.20343e-11	3.52724e-09	Up	24.3997	29.4289	35.8265	7.30719	28.5659	122.417	96.7774	172.595	235.013	206.839
MSTRG.6677	24.9113	-7.96304	1.20835	-6.59002	4.39779e-11	3.67484e-09	Down	14.0768	40.2195	27.4947	139.648	27.6732	0	0	0	0	0
MSTRG.2427	568.274	2.34622	0.357449	6.5638	5.2455e-11	4.32862e-09	Up	195.198	198.154	232.456	89.31	218.707	859.146	388.107	1610.88	954.807	935.972
HHLG4g0449	21.4742	8.03153	1.22356	6.56408	5.23559e-11	4.32862e-09	Up	0	0	0	0	0	15.5804	26.938	119.173	37.9393	15.1115
MSTRG.18212	3124.24	2.58333	0.39386	6.559	5.41681e-11	4.45152e-09	Up	571.516	1197.76	1292.25	855.753	549.893	5168.23	3020.05	11187.1	4857.29	2542.52
MSTRG.14102	80.4887	2.99914	0.458119	6.54664	5.8846e-11	4.80616e-09	Up	30.0304	21.5812	4.16587	16.2382	17.8537	100.159	109.748	101.365	231.852	171.894
MSTRG.24965	20.8278	7.99182	1.22272	6.5361	6.31422e-11	5.12547e-09	Up	0	0	0	0	0	33.3865	5.98623	43.8336	94.8483	30.2231
MSTRG.18830	1152.09	2.10225	0.32181	6.53257	6.46495e-11	5.22649e-09	Up	477.671	271.727	531.565	259.811	635.591	2093.33	2662.88	1579.38	981.153	2027.78
MSTRG.18969	4163.17	2.20637	0.338577	6.51659	7.1923e-11	5.74445e-09	Up	1758.66	859.323	1921.3	1058.73	1815.72	5563.3	3443.08	11700.8	8317.15	5193.65
MSTRG.8865	202.583	-3.23632	0.496842	-6.51379	7.32771e-11	5.82919e-09	Down	438.256	222.679	264.949	664.954	241.024	42.2896	52.8784	13.698	73.7709	11.3337
MSTRG.18193	64.6015	3.23871	0.497283	6.51281	7.37571e-11	5.85567e-09	Up	23.4613	11.7716	18.3298	4.87146	3.57073	97.9337	73.8302	142.459	169.673	100.114
MSTRG.12995	150.061	-2.10161	0.322972	-6.50708	7.66249e-11	6.07122e-09	Down	241.182	141.259	254.951	211.908	368.678	60.0957	72.8325	30.1356	60.0706	59.5017
MSTRG.1857	16818.3	2.1421	0.329239	6.50622	7.70651e-11	6.09397e-09	Up	8243.35	10013.7	3298.54	5113.41	4395.57	27587.3	26281.6	43793.8	21064.8	18390.8
MSTRG.5774	258.972	2.83092	0.43539	6.50204	7.92382e-11	6.25338e-09	Up	30.0304	48.0672	42.4919	126.658	71.4147	518.604	657.488	520.524	420.494	153.949
MSTRG.24542	1541.97	2.39183	0.367923	6.50089	7.98439e-11	6.28869e-09	Up	529.286	405.138	533.231	400.271	599.883	2073.3	4528.58	2742.34	2882.34	725.354
MSTRG.26762	48.3675	-4.64399	0.718404	-6.46431	1.0176e-10	7.90532e-09	Down	77.8914	61.8007	145.805	146.144	33.922	4.45153	0	0	4.21548	9.44472
MSTRG.25492	150.174	2.90915	0.450308	6.46036	1.04457e-10	8.0832e-09	Up	32.8458	22.5621	44.1582	47.9027	28.5659	368.364	262.396	376.695	263.468	54.7794
MSTRG.25350	139.619	-2.27287	0.352062	-6.45588	1.07595e-10	8.30987e-09	Down	344.411	223.66	241.62	134.777	212.459	36.7251	27.9357	56.1618	40.0471	78.3912
MSTRG.26015	11635.1	2.13274	0.330491	6.45327	1.09462e-10	8.43772e-09	Up	2637.04	2762.39	8308.41	3803.8	4092.06	16348.3	21040.6	28513.7	15067.2	13778
MSTRG.4207	76.6894	2.88082	0.446512	6.45182	1.10512e-10	8.50083e-09	Up	9.3845	13.7335	32.4938	7.30719	28.5659	171.384	117.729	143.829	161.242	81.2246
MSTRG.25599	4461.74	2.12254	0.329715	6.43748	1.21473e-10	9.27366e-09	Up	908.42	1424.36	2542.85	1609.2	1846.96	6740.73	4751.07	11848.8	8753.45	4191.57
MSTRG.25540	3359.34	3.21955	0.501856	6.4153	1.40548e-10	1.05677e-08	Up	213.967	356.09	1810.49	556.97	318.688	5478.72	6944.03	8870.82	6471.82	2571.8
MSTRG.11101	43.2605	4.78077	0.745323	6.41435	1.41424e-10	1.06134e-08	Up	7.5076	0	0	3.24764	4.46342	67.8859	34.9197	102.735	166.512	45.3346
MSTRG.7663	122.914	2.32259	0.362594	6.40548	1.49898e-10	1.12071e-08	Up	31.9073	17.6573	59.9885	44.655	49.9903	134.659	153.647	265.741	278.222	192.672
HHLG43g0038	20.7826	4.49797	0.7022	6.40554	1.49835e-10	1.12071e-08	Up	3.7538	0	3.3327	1.62382	0	32.2736	27.9357	45.2034	47.4242	46.2791
MSTRG.23702	4135.16	2.4902	0.388804	6.40479	1.50581e-10	1.1237e-08	Up	702.899	674.902	2410.37	1530.45	928.391	7132.47	7380.03	10000.9	7677.45	2913.7
MSTRG.21071	4134.92	-3.04016	0.475231	-6.39722	1.58227e-10	1.17635e-08	Down	10889.8	7036.45	5462.29	8605.43	4874.05	366.139	1087.5	289.028	2224.72	513.793
HHLG5g0688	106.432	2.04656	0.319956	6.3964	1.59084e-10	1.18052e-08	Up	28.1535	49.0481	65.8207	36.5359	27.6732	208.109	117.729	175.334	162.296	193.617
MSTRG.16885	1406.92	2.00293	0.313885	6.38108	1.75842e-10	1.29761e-08	Up	587.47	683.731	630.713	447.362	459.732	2024.33	1004.69	4010.77	2234.21	1986.22
MSTRG.4172	688.882	-3.57551	0.560673	-6.37717	1.80385e-10	1.32867e-08	Down	1401.11	2754.54	976.48	82.8148	1140.85	105.724	99.7705	86.2973	167.565	73.6688
MSTRG.12640	43.4394	4.50223	0.706236	6.37497	1.83001e-10	1.34545e-08	Up	3.7538	3.92385	0	10.5548	0	53.4184	96.7774	101.365	111.71	52.8904
MSTRG.13576	63.4908	2.39289	0.375414	6.37399	1.84174e-10	1.35158e-08	Up	36.5996	15.6954	16.6635	21.9216	10.7122	99.0466	106.754	115.063	135.949	76.5022
MSTRG.20508	233.536	2.54299	0.399648	6.36307	1.97761e-10	1.44095e-08	Up	42.2303	103.001	105.813	27.6049	63.3805	409.541	223.486	631.477	424.71	304.12
MSTRG.11456	77.9172	3.10685	0.488467	6.36042	2.01206e-10	1.46307e-08	Up	15.9537	25.505	23.3289	4.87146	11.6049	151.352	45.8944	146.569	153.865	200.228
MSTRG.23012	1248.84	6.70738	1.05641	6.34922	2.16403e-10	1.56499e-08	Up	0	71.6103	9.99809	33.2883	3.57073	2063.29	503.841	3610.79	3284.91	2907.08
MSTRG.8226	636.854	-3.39357	0.534956	-6.34364	2.24401e-10	1.61695e-08	Down	1712.67	1151.65	994.81	1230.04	726.644	45.6282	121.72	21.9168	307.73	55.7238
MSTRG.4991	1944.83	2.92624	0.46163	6.33893	2.3137e-10	1.66114e-08	Up	223.351	188.345	993.143	497.701	357.966	3406.54	5211.01	4332.67	3181.64	1055.92
MSTRG.13542	377.904	-2.52831	0.398943	-6.33752	2.33497e-10	1.6734e-08	Down	1050.13	386.499	341.601	1070.91	371.356	134.659	83.8072	106.844	163.35	69.8909
HHLG13g0329	29.9397	3.43256	0.541759	6.33595	2.35885e-10	1.68747e-08	Up	1.8769	4.90481	4.16587	9.74291	4.46342	74.5632	26.938	61.641	42.1548	68.9464
MSTRG.25996	523.605	2.78731	0.44046	6.32818	2.48066e-10	1.76509e-08	Up	208.336	152.049	101.647	90.122	110.693	497.459	690.412	549.289	2309.03	527.015
MSTRG.8477	326.495	-2.56495	0.40602	-6.3173	2.66166e-10	1.88042e-08	Down	768.591	484.596	393.258	682.816	464.195	66.773	94.782	47.943	212.882	49.1125
MSTRG.10090	158.324	2.3069	0.365383	6.31366	2.72509e-10	1.91165e-08	Up	64.7531	25.505	63.3212	35.724	76.7708	257.076	413.05	247.934	250.821	148.282
MSTRG.27798	194.475	2.19296	0.347413	6.31225	2.75003e-10	1.92575e-08	Up	94.7835	47.0862	50.8236	73.8838	82.1269	232.593	181.582	553.399	267.683	360.788
MSTRG.25742	74.3297	5.10376	0.808959	6.30905	2.80762e-10	1.96262e-08	Up	0	9.80963	3.3327	0	8.03415	219.238	33.922	178.074	245.552	45.3346
MSTRG.16679	482.008	2.2242	0.353604	6.2901	3.17261e-10	2.20999e-08	Up	131.383	126.544	234.955	211.096	145.507	324.962	728.325	732.843	745.086	1439.38
MSTRG.21765	93.646	-4.36372	0.693967	-6.28807	3.21435e-10	2.23515e-08	Down	153.906	345.299	34.9933	332.071	26.7805	17.8061	6.98394	6.849	4.21548	7.55577
MSTRG.10589	415.879	2.07776	0.33054	6.28596	3.25843e-10	2.25791e-08	Up	222.413	74.5532	121.643	254.128	123.19	534.184	528.784	919.135	681.854	698.909
MSTRG.7139	597.483	2.15078	0.342368	6.28208	3.34074e-10	2.30691e-08	Up	176.429	168.726	364.93	274.425	113.371	952.628	1387.81	520.524	1132.91	883.081
MSTRG.11923	616.231	2.08297	0.33208	6.27249	3.5531e-10	2.44506e-08	Up	202.705	224.64	243.287	275.237	230.312	654.375	588.646	1699.92	1458.56	584.628
MSTRG.18795	4439.55	5.50647	0.87852	6.26789	3.65976e-10	2.51411e-08	Up	15.0152	129.487	600.718	166.441	43.7415	8501.31	16631.7	8070.86	6906.01	3330.21
MSTRG.12876	186.528	2.39648	0.382845	6.25967	3.85788e-10	2.64109e-08	Up	19.7075	83.3818	35.8265	82.0029	76.7708	219.238	384.117	343.82	372.016	248.396
MSTRG.21547	135.148	2.41894	0.387147	6.24813	4.15404e-10	2.81957e-08	Up	45.9841	75.5341	21.6625	30.0407	40.1707	268.205	305.298	249.303	207.612	107.67
MSTRG.30086	12.7299	7.27968	1.16518	6.24768	4.16598e-10	2.82286e-08	Up	0	0	0	0	0	36.7251	31.9266	31.5054	15.8081	11.3337
MSTRG.22833	482.703	-2.24189	0.359017	-6.24452	4.25091e-10	2.87551e-08	Down	1048.25	787.713	760.688	910.151	478.478	162.481	203.532	83.5577	302.461	89.7248
MSTRG.4205	24.759	5.49513	0.880773	6.23899	4.40402e-10	2.97402e-08	Up	0	2.94289	2.49952	0	0	95.708	30.9289	41.094	52.6935	21.7229
MSTRG.19053	796.528	2.65471	0.425837	6.23409	4.54398e-10	3.06334e-08	Up	204.582	96.1344	472.41	113.667	204.424	1200.8	2137.08	1346.51	1577.64	612.018
MSTRG.30855	914.16	2.11987	0.340378	6.22799	4.72453e-10	3.17429e-08	Up	170.798	566.016	268.282	364.547	340.112	1897.47	1326.95	2257.43	988.531	961.472
HHLG37g0728	12.9189	7.29862	1.17221	6.22636	4.77393e-10	3.20207e-08	Up	0	0	0	0	0	38.9509	14.9656	42.4638	15.8081	17.0005
MSTRG.5908	104.556	-2.47626	0.397725	-6.22608	4.78262e-10	3.20251e-08	Down	134.198	256.031	114.145	291.476	91.0537	26.7092	35.9174	21.9168	31.6161	42.5012
MSTRG.29701	176.832	2.32464	0.373493	6.22405	4.84496e-10	3.2388e-08	Up	40.3534	75.5341	68.3203	88.4981	21.4244	272.656	199.541	275.33	285.599	441.068
MSTRG.25509	422.04	-2.07887	0.334624	-6.21256	5.21276e-10	3.47299e-08	Down	387.58	723.951	597.386	1136.67	567.747	122.417	159.633	138.35	112.764	273.897
MSTRG.16684	203.981	-3.13538	0.505373	-6.20409	5.50139e-10	3.65916e-08	Down	398.841	540.511	294.11	440.055	157.112	33.3865	49.8853	68.49	52.6935	4.72236
HHLG43g0407	212.256	2.27106	0.366153	6.20249	5.55759e-10	3.69037e-08	Up	140.768	49.0481	85.8169	30.0407	58.9171	329.413	452.958	305.465	341.454	328.676
MSTRG.25436	311.079	3.0109	0.485596	6.20042	5.63122e-10	3.73303e-08	Up	82.5836	99.0772	27.4947	113.667	20.5317	472.975	373.142	734.212	945.322	241.785
MSTRG.15490	2807.2	2.23465	0.360447	6.19966	5.6584e-10	3.74481e-08	Up	580.901	846.571	1604.69	848.445	1038.19	3995.25	2254.81	6298.34	7744.89	2859.86
MSTRG.11412	222.972	2.39333	0.386375	6.19432	5.85364e-10	3.86117e-08	Up	117.306	43.1624	102.48	29.2287	64.2732	338.317	401.078	578.055	259.252	296.564
MSTRG.26885	1278.13	2.31054	0.373269	6.19	6.01639e-10	3.96195e-08	Up	493.625	137.335	606.551	237.078	669.512	1655.97	1814.83	2204.01	2148.84	2813.58
MSTRG.30177	19.0686	-7.57692	1.22502	-6.18513	6.20503e-10	4.07942e-08	Down	60.0608	15.6954	11.6644	83.6267	19.639	0	0	0	0	0
MSTRG.14702	138.679	3.35412	0.542996	6.17707	6.5302e-10	4.28612e-08	Up	35.6611	7.8477	26.6616	30.0407	23.2098	461.847	104.759	64.3806	423.656	208.728
MSTRG.27534	56.6661	3.64083	0.589454	6.17661	6.54909e-10	4.29143e-08	Up	19.7075	10.7906	0	6.49528	5.3561	92.3693	81.8118	153.418	111.71	85.0025
MSTRG.18412	605.481	-2.74386	0.444305	-6.17562	6.5904e-10	4.3114e-08	Down	1705.16	1254.65	786.516	910.962	611.488	140.223	190.562	72.5994	328.808	53.8349
MSTRG.3480	2802	2.06371	0.33452	6.16916	6.86544e-10	4.4766e-08	Up	1070.77	1726.49	1087.29	651.151	873.044	5498.76	2541.16	7333.9	4485.27	2752.19
MSTRG.5109	1210.75	2.0675	0.335827	6.15645	7.4395e-10	4.81847e-08	Up	376.319	289.384	604.051	305.278	756.995	2489.52	2582.06	1335.55	2251.07	1117.31
MSTRG.5179	955.541	5.12131	0.831893	6.15622	7.4503e-10	4.81847e-08	Up	45.9841	34.3337	117.478	24.3573	44.6342	890.307	5833.58	1301.31	1125.53	137.893
MSTRG.6689	303.14	2.06612	0.335681	6.15501	7.50704e-10	4.83943e-08	Up	99.4757	68.6674	129.142	69.0123	217.815	480.766	432.006	594.493	584.898	355.121
MSTRG.15865	121.285	2.12374	0.345115	6.1537	7.56942e-10	4.87174e-08	Up	15.9537	49.0481	44.9914	53.586	62.4878	159.142	236.456	234.236	208.666	148.282
MSTRG.15232	25426.4	2.21021	0.359644	6.14554	7.96917e-10	5.10425e-08	Up	12099.4	16286.9	6116.33	4135.06	6546.05	40772.7	22730.7	52096.2	52194	41286.6
MSTRG.11102	46.2357	5.21016	0.848172	6.14281	8.10756e-10	5.18454e-08	Up	0	9.80963	0	0	2.67805	101.272	42.9013	131.501	122.249	51.946
MSTRG.11342	137.257	3.49604	0.569197	6.14206	8.14585e-10	5.20066e-08	Up	7.5076	7.8477	16.6635	64.9528	14.2829	294.914	435.997	197.251	115.926	217.229
HHLG32g0400	101.135	-2.84103	0.463044	-6.13554	8.48687e-10	5.38381e-08	Down	167.983	65.7245	279.113	94.1815	280.303	40.0638	16.961	24.6564	16.8619	25.5007
MSTRG.19135	23.2518	8.14992	1.33023	6.1267	8.97207e-10	5.66451e-08	Up	0	0	0	0	0	6.6773	36.9151	76.7088	107.495	4.72236
MSTRG.10548	678.719	3.39668	0.554816	6.12217	9.23109e-10	5.80042e-08	Up	47.861	237.393	127.476	107.172	68.7366	1019.4	136.686	2495.77	1259.38	1287.32
MSTRG.27896	1189.21	2.35456	0.385066	6.11468	9.67481e-10	6.06965e-08	Up	451.395	116.735	515.735	257.375	603.454	1851.84	3018.06	2208.12	1538.65	1330.76
MSTRG.16404	25.6675	2.96444	0.485791	6.10229	1.04558e-09	6.52872e-08	Up	5.6307	4.90481	9.16491	5.68337	3.57073	54.5313	45.8944	57.5316	44.2626	25.5007
MSTRG.21311	99.9203	3.73356	0.613577	6.0849	1.16562e-09	7.22156e-08	Up	3.7538	10.7906	6.66539	34.9121	13.3902	160.255	72.8325	434.226	80.0942	182.283
MSTRG.31747	20.8871	6.8277	1.12372	6.07597	1.2324e-09	7.62346e-08	Up	0	0	1.66635	0	0	55.6442	39.9082	60.2712	40.0471	11.3337
MSTRG.29490	100.001	2.47978	0.40876	6.06659	1.30654e-09	8.05697e-08	Up	26.2766	21.5812	35.8265	23.5454	44.6342	214.786	218.497	171.225	190.751	52.8904
HHLG13g0568	11.6822	7.15573	1.18002	6.06406	1.32729e-09	8.17231e-08	Up	0	0	0	0	0	10.0159	15.9633	35.6148	31.6161	23.6118
MSTRG.1725	19.063	-4.25954	0.702525	-6.06318	1.33453e-09	8.20415e-08	Down	37.538	47.0862	29.1611	26.793	41.0634	0	2.99312	0	3.16161	2.83342
HHLG32g0501	23.5021	-5.79142	0.955804	-6.05921	1.36789e-09	8.38334e-08	Down	75.076	30.4098	48.3241	29.2287	48.2049	0	0	0	0	3.77789
MSTRG.26661	103.099	-4.3006	0.710614	-6.05196	1.43098e-09	8.71624e-08	Down	273.089	214.831	49.9904	351.557	91.9464	0	9.97705	5.4792	28.4545	5.66683
HHLG27g0117	67.4425	2.39031	0.395018	6.05114	1.43828e-09	8.74732e-08	Up	9.3845	15.6954	28.3279	29.2287	24.9951	60.0957	141.674	134.24	103.279	127.504
MSTRG.19754	671.321	3.2162	0.531797	6.0478	1.46838e-09	8.9032e-08	Up	60.0608	54.9339	316.606	166.441	53.561	977.111	1057.57	2321.81	1322.61	382.511
MSTRG.29344	100.832	2.55039	0.422095	6.04223	1.52002e-09	9.20225e-08	Up	31.9073	16.6764	32.4938	30.0407	35.7073	155.804	324.254	205.47	93.7945	82.1691
MSTRG.3139	62.7073	3.13533	0.519288	6.03775	1.56276e-09	9.43878e-08	Up	11.2614	14.7144	23.3289	4.87146	9.81952	113.514	45.8944	184.923	160.188	58.5573
MSTRG.8383	1149.47	-2.73201	0.452942	-6.0317	1.62242e-09	9.74455e-08	Down	3034.01	1726.49	1599.69	2308.26	1322.96	165.82	340.217	136.98	735.602	124.67
MSTRG.29470	49.3884	-4.95127	0.820899	-6.03152	1.6243e-09	9.74455e-08	Down	162.352	59.8387	89.9828	126.658	39.2781	0	0	8.21879	0	7.55577
MSTRG.7918	77.1832	-2.55381	0.423795	-6.02606	1.68006e-09	1.00337e-07	Down	152.029	154.011	119.977	108.796	125.868	17.8061	26.938	9.58859	10.5387	46.2791
MSTRG.6730	90.194	2.73695	0.454209	6.02575	1.68324e-09	1.00376e-07	Up	17.8306	10.7906	31.6606	38.9717	17.8537	62.3215	157.637	249.303	201.289	114.281
HHLG25g0143	33.3891	-3.96792	0.658783	-6.0231	1.71105e-09	1.01729e-07	Down	82.5836	58.8578	40.8255	73.0719	58.0244	0	5.98623	8.21879	6.32322	0
MSTRG.7579	47.3507	4.54966	0.755749	6.02007	1.74339e-09	1.03461e-07	Up	9.3845	0	7.49856	2.43573	0	80.1276	35.9174	127.391	155.973	54.7794
MSTRG.25633	711.077	2.06475	0.342988	6.01989	1.74538e-09	1.03461e-07	Up	167.044	205.021	412.421	440.867	145.507	1150.72	1094.48	1683.48	952.699	858.525
MSTRG.12098	850.935	2.03127	0.337614	6.01653	1.78196e-09	1.05473e-07	Up	284.35	530.701	242.454	328.823	286.551	782.357	700.389	1723.21	1555.51	2075
MSTRG.18798	373.734	3.00662	0.500098	6.01206	1.83177e-09	1.07939e-07	Up	49.7379	66.7055	215.792	46.2788	34.8146	1197.46	734.311	290.397	660.777	441.068
MSTRG.4992	2293.5	2.64878	0.440858	6.00823	1.87563e-09	1.1036e-07	Up	353.796	295.27	1365.57	620.299	518.649	3743.74	6143.87	4991.55	3625.31	1276.93
MSTRG.18100	633.611	3.10767	0.517567	6.00439	1.92047e-09	1.12831e-07	Up	42.2303	32.3718	353.266	90.122	140.151	1179.66	1423.73	1427.33	692.393	954.861
MSTRG.23329	120.873	2.66635	0.444119	6.00369	1.9288e-09	1.13154e-07	Up	20.6459	23.5431	51.6568	30.8526	37.4927	292.688	327.247	224.647	133.842	66.113
MSTRG.7966	406.052	2.0307	0.338363	6.00155	1.95442e-09	1.1429e-07	Up	123.875	107.906	314.94	103.113	148.185	584.264	831.088	672.571	415.225	759.355
MSTRG.13541	780.791	2.16663	0.361555	5.99253	2.066e-09	1.20315e-07	Up	261.828	215.812	119.977	505.82	318.688	1337.69	1961.49	817.77	1366.87	901.971
MSTRG.21373	57.1987	-3.70075	0.618302	-5.98534	2.15945e-09	1.2539e-07	Down	103.23	19.6193	234.955	78.7552	94.6244	14.4675	10.9748	5.4792	4.21548	5.66683
MSTRG.5753	508.789	2.2364	0.374312	5.97469	2.30532e-09	1.32698e-07	Up	180.182	96.1344	165.802	307.714	140.151	794.599	1002.69	1380.76	653.4	366.455
HHLG25g0428	46.6319	4.38922	0.7349	5.97254	2.33593e-09	1.34072e-07	Up	0	3.92385	3.3327	3.24764	10.7122	87.9178	41.9036	57.5316	226.582	31.1676
MSTRG.16211	576.614	-2.14902	0.359805	-5.97274	2.33307e-09	1.34072e-07	Down	1497.77	773.98	834.007	595.13	1005.16	306.043	109.748	104.105	263.468	276.73
MSTRG.27840	354.811	-2.72088	0.455852	-5.96877	2.39054e-09	1.36615e-07	Down	625.008	457.129	660.707	899.596	439.2	125.756	107.752	10.9584	137.003	85.0025
MSTRG.10487	79.9543	-2.31495	0.388239	-5.96268	2.48139e-09	1.41603e-07	Down	176.429	73.5722	139.973	112.044	164.254	31.1607	41.9036	13.698	29.5084	17.0005
MSTRG.6024	2898.13	2.33321	0.39199	5.95221	2.64547e-09	1.49678e-07	Up	955.342	1572.48	451.58	1200.81	618.63	2724.34	4565.5	9237.93	4901.55	2753.14
MSTRG.9227	12527.2	2.00612	0.337386	5.94607	2.7465e-09	1.54953e-07	Up	6429.32	4066.09	4944.05	2119.08	7411.06	14744.6	11831.8	25279.6	19664.2	28781.8
MSTRG.15879	26.2333	-4.85076	0.815969	-5.94478	2.76824e-09	1.55959e-07	Down	25.3382	27.467	69.9866	87.6862	42.8488	0	0.997705	2.7396	5.26935	0
MSTRG.15207	10.8257	7.04796	1.186	5.94263	2.80482e-09	1.57796e-07	Up	0	0	0	0	0	21.1448	7.98164	23.2866	28.4545	27.3897
MSTRG.21942	1382.82	2.32488	0.392995	5.91579	3.30281e-09	1.82711e-07	Up	542.424	762.208	337.435	392.964	266.02	1881.89	893.944	3043.69	4086.91	1620.71
MSTRG.12768	294.525	-3.12943	0.532716	-5.87448	4.24179e-09	2.29821e-07	Down	925.312	403.176	354.932	693.371	266.912	12.2417	76.8233	28.7658	141.219	42.5012
MSTRG.25632	2115.57	2.01692	0.343429	5.87288	4.28282e-09	2.31453e-07	Up	458.902	473.805	1376.4	1321.79	559.712	3780.46	3426.12	4220.35	3100.49	2437.68
MSTRG.540	71.1763	2.83969	0.483567	5.87237	4.29597e-09	2.31848e-07	Up	15.0152	11.7716	21.6625	25.9811	12.4976	91.2564	42.9013	150.678	245.552	94.4472
MSTRG.7895	199.819	2.05354	0.349787	5.87082	4.33639e-09	2.33396e-07	Up	63.8146	64.7435	106.646	59.2694	92.8391	245.947	220.493	631.477	274.006	238.951
MSTRG.14969	2272.74	2.10749	0.359117	5.86853	4.39677e-09	2.36326e-07	Up	793.929	1536.19	642.377	638.973	669.512	3631.34	1425.72	4510.75	5709.87	3168.7
MSTRG.17599	207.177	2.13021	0.363177	5.86549	4.47815e-09	2.39729e-07	Up	50.6763	59.8387	80.8179	108.796	84.8049	387.283	536.765	252.043	370.962	139.782
MSTRG.24548	5194.56	2.24579	0.383032	5.86319	4.54051e-09	2.4274e-07	Up	1067.02	1435.15	2254.57	2771.86	1515.78	6533.74	2981.14	15119.8	10794.8	7471.72
MSTRG.7428	228.489	-2.7755	0.47348	-5.86191	4.57581e-09	2.43972e-07	Down	568.701	322.737	387.426	444.114	271.376	58.9828	60.86	10.9584	128.572	31.1676
MSTRG.24951	3075.74	3.98093	0.681395	5.84232	5.14781e-09	2.72279e-07	Up	202.705	1143.8	167.468	201.354	116.942	4580.63	2253.82	9429.7	6426.5	6234.46
MSTRG.5813	3264.57	2.10249	0.360033	5.83971	5.22932e-09	2.75857e-07	Up	1036.05	599.368	1758	513.939	2258.49	5238.34	5557.22	5102.5	5231.41	5350.43
MSTRG.26398	235.794	-4.11143	0.704649	-5.83472	5.38815e-09	2.83484e-07	Down	38.4765	207.964	658.207	1066.85	257.985	28.935	48.8876	5.4792	7.37709	37.7789
MSTRG.2979	89.1947	4.23582	0.726436	5.83095	5.51122e-09	2.89194e-07	Up	23.4613	3.92385	6.66539	6.49528	4.46342	76.7889	41.9036	317.793	378.34	32.112
MSTRG.24838	113.881	-2.63067	0.451191	-5.83051	5.5259e-09	2.89582e-07	Down	191.444	156.954	156.637	297.159	178.537	20.0319	6.98394	30.1356	44.2626	56.6683
MSTRG.30921	15.8746	7.60006	1.30379	5.82923	5.56847e-09	2.91429e-07	Up	0	0	0	0	0	28.935	63.8531	35.6148	28.4545	1.88894
MSTRG.25069	797.074	3.00742	0.517531	5.81108	6.20696e-09	3.2188e-07	Up	76.9529	90.2486	380.76	203.789	129.439	1799.53	2315.67	1038.31	1681.98	254.063
HHLG36g0133	29.5596	2.64915	0.455978	5.80981	6.2544e-09	3.23918e-07	Up	11.2614	10.7906	4.99904	3.24764	10.7122	55.6442	62.8554	43.8336	51.6397	40.6123
MSTRG.17369	598.298	2.96458	0.510947	5.80212	6.5483e-09	3.37819e-07	Up	41.2918	36.2956	368.263	107.172	125.868	1250.88	1314.98	1206.79	777.756	753.689
MSTRG.13920	81.4477	3.45702	0.597435	5.78643	7.18967e-09	3.69469e-07	Up	18.769	24.5241	0	8.931	16.0683	173.61	103.761	194.511	194.966	79.3356
MSTRG.26999	37.5881	-3.05267	0.527738	-5.78443	7.27567e-09	3.72925e-07	Down	47.861	54.9339	94.9818	68.2004	69.6293	0	9.97705	9.58859	8.43096	12.2781
MSTRG.2776	183.977	9.50445	1.64935	5.76253	8.2863e-09	4.20929e-07	Up	0	0	0	2.43573	0	18.919	673.451	925.984	16.8619	202.117
MSTRG.7347	87.3441	2.80091	0.486806	5.75364	8.73406e-09	4.42544e-07	Up	8.44605	35.3147	20.8293	22.7335	22.3171	130.207	37.9128	189.032	223.421	183.228
MSTRG.8622	53.3058	2.68358	0.466796	5.74894	8.98071e-09	4.53886e-07	Up	6.56915	26.486	9.99809	13.8025	15.1756	137.998	128.704	63.0108	82.2019	49.1125
MSTRG.2925	65.1571	2.78997	0.485578	5.74567	9.15587e-09	4.61565e-07	Up	4.69225	18.6383	27.4947	7.30719	24.1024	152.465	148.658	119.173	80.0942	68.9464
MSTRG.30062	163.988	2.40214	0.41874	5.73658	9.66077e-09	4.83951e-07	Up	30.0304	84.3628	26.6616	60.0813	59.8098	239.27	107.752	395.872	395.201	240.84
MSTRG.19477	316.814	2.29257	0.400004	5.73137	9.96252e-09	4.97813e-07	Up	48.7994	160.878	114.978	164.006	48.2049	554.216	319.266	534.222	832.558	391.011
HHLG46g0462	37.1063	4.78436	0.834968	5.72999	1.00438e-08	5.01244e-07	Up	0	0	4.16587	2.43573	6.24878	42.2896	15.9633	36.9846	122.249	140.726
MSTRG.6289	105.351	2.46126	0.4296	5.72918	1.00916e-08	5.03002e-07	Up	7.5076	42.1814	30.8274	55.2098	25.8878	113.514	185.573	242.454	163.35	187.005
MSTRG.15722	142.795	-2.13712	0.37453	-5.70613	1.15571e-08	5.69622e-07	Down	241.182	153.03	304.942	116.915	347.254	50.0797	54.8738	64.3806	26.3468	68.9464
MSTRG.9454	74.3564	2.21935	0.38906	5.70439	1.16759e-08	5.74051e-07	Up	18.769	33.3527	18.3298	12.9906	48.2049	105.724	97.7751	160.266	115.926	132.226
MSTRG.1721	154.951	-2.20563	0.386737	-5.70318	1.17594e-08	5.76733e-07	Down	227.105	300.175	264.116	238.701	244.595	50.0797	53.8761	27.396	26.3468	117.115
MSTRG.6820	58.648	-2.33496	0.409652	-5.69986	1.19905e-08	5.8662e-07	Down	165.167	107.906	64.9876	98.241	53.561	24.4834	15.9633	13.698	17.9158	24.5563
MSTRG.15138	626.164	2.036	0.358665	5.67659	1.37407e-08	6.60866e-07	Up	199.89	447.319	209.96	105.548	265.127	898.097	711.364	1601.3	1066.52	756.522
MSTRG.3829	281.735	2.5818	0.454971	5.67466	1.38965e-08	6.65946e-07	Up	108.86	102.02	39.1592	112.044	41.0634	642.134	400.08	899.958	298.245	173.783
MSTRG.14765	42.5123	-3.52172	0.62091	-5.67187	1.41249e-08	6.76075e-07	Down	48.7994	169.707	69.9866	47.9027	55.3464	8.90307	5.98623	0	5.26935	13.2226
MSTRG.4682	1438.13	-2.31918	0.409267	-5.66667	1.45596e-08	6.92589e-07	Down	3379.36	2018.82	2264.57	2640.33	1678.24	289.35	686.421	198.621	979.046	246.507
MSTRG.8861	66.6431	2.40217	0.425024	5.65185	1.58726e-08	7.5069e-07	Up	21.5844	23.5431	17.4967	21.1096	22.3171	65.6601	212.511	145.199	64.2861	72.7243
MSTRG.23024	186.223	2.38376	0.422774	5.63837	1.71671e-08	8.06164e-07	Up	30.0304	39.2385	37.4928	56.0218	136.581	274.882	176.594	310.944	386.77	413.679
MSTRG.18411	384.1	-2.91347	0.517209	-5.63306	1.77037e-08	8.30384e-07	Down	1099.86	534.625	698.2	698.242	360.644	70.1116	146.663	16.4376	181.266	34.9455
MSTRG.21766	23.0022	-7.84729	1.39478	-5.62618	1.84247e-08	8.63182e-07	Down	26.2766	52.972	3.3327	142.084	5.3561	0	0	0	0	0
MSTRG.27917	8.22985	6.65213	1.18346	5.62091	1.89951e-08	8.85732e-07	Up	0	0	0	0	0	12.2417	15.9633	19.1772	17.9158	17.0005
MSTRG.8514	155.239	-2.39826	0.428904	-5.5916	2.24981e-08	1.03812e-06	Down	263.704	67.6864	427.418	260.623	285.659	41.1767	31.9266	43.8336	54.8013	75.5577
MSTRG.31050	41.6907	4.68372	0.837785	5.5906	2.26293e-08	1.04297e-06	Up	1.8769	0	9.99809	0	3.57073	112.401	27.9357	126.022	109.603	25.5007
MSTRG.30486	71.6149	-3.17243	0.567821	-5.58702	2.31004e-08	1.06345e-06	Down	207.397	154.011	106.646	113.667	63.3805	4.45153	25.9403	5.4792	29.5084	5.66683
MSTRG.13593	57.4279	-3.42438	0.613302	-5.58352	2.35692e-08	1.08378e-06	Down	64.7531	136.354	69.9866	168.065	86.5903	5.56442	13.9679	8.21879	0	20.7784
MSTRG.23869	432.975	-4.51219	0.808293	-5.58237	2.37267e-08	1.08976e-06	Down	2079.61	677.845	284.945	755.076	350.825	8.90307	63.8531	8.21879	85.3635	15.1115
MSTRG.4584	853.461	-2.16839	0.388562	-5.58056	2.3974e-08	1.09858e-06	Down	2088.99	1242.88	773.185	2028.15	848.942	279.334	494.862	161.636	444.733	171.894
MSTRG.7427	517.21	-2.82105	0.506397	-5.57083	2.53526e-08	1.1551e-06	Down	1334.48	626.835	906.493	1027.07	636.483	73.4503	207.523	56.1618	277.168	26.4452
MSTRG.13309	17.3144	6.55597	1.17807	5.56503	2.6211e-08	1.19012e-06	Up	0	0	1.66635	0	0	23.3705	7.98164	47.943	60.0706	32.112
MSTRG.15863	866.297	2.12818	0.382539	5.56331	2.64712e-08	1.20056e-06	Up	329.396	525.796	219.125	428.688	109.8	983.789	857.029	2016.34	1626.12	1566.88
MSTRG.22828	18.5319	-4.22357	0.759693	-5.55957	2.70437e-08	1.22095e-06	Down	43.1687	55.9149	29.9943	27.6049	19.639	2.22577	2.99312	0	0	3.77789
MSTRG.2645	621.821	2.49975	0.450038	5.55454	2.78342e-08	1.25238e-06	Up	106.045	143.221	144.972	435.995	103.551	1107.32	1395.79	820.51	1583.97	376.844
MSTRG.21399	1036.22	2.1271	0.383768	5.54267	2.97888e-08	1.33294e-06	Up	394.149	494.405	409.088	183.492	449.02	1989.84	824.105	3076.57	1737.83	803.746
MSTRG.11581	81.5524	-3.36591	0.608409	-5.53231	3.16037e-08	1.40766e-06	Down	262.766	80.439	46.6577	270.366	83.0195	7.79018	4.98853	16.4376	32.67	10.3892
MSTRG.30366	55.675	2.30556	0.417021	5.52864	3.22721e-08	1.43102e-06	Up	22.5228	25.505	23.3289	14.6144	8.03415	75.6761	113.738	46.5732	119.087	107.67
MSTRG.23095	64.7777	3.75179	0.678649	5.52832	3.23304e-08	1.43201e-06	Up	17.8306	4.90481	0	11.3667	10.7122	28.935	180.585	193.142	91.6867	108.614
MSTRG.29109	144.347	6.47077	1.17175	5.5223	3.34588e-08	1.47541e-06	Up	0	0	4.99904	6.49528	4.46342	227.028	939.838	36.9846	180.212	43.4457
HHLG16g0380	63.3498	-2.42552	0.440386	-5.5077	3.63544e-08	1.59779e-06	Down	124.814	94.1724	120.81	112.855	82.1269	25.5963	29.9312	9.58859	5.26935	28.3342
HHLG11g0329	60.4797	2.22272	0.40381	5.50438	3.70472e-08	1.62465e-06	Up	35.6611	17.6573	16.6635	24.3573	12.4976	51.1926	130.699	91.7765	131.734	92.5582
MSTRG.1591	292.458	2.10187	0.38257	5.49409	3.92739e-08	1.71098e-06	Up	101.353	70.6293	129.975	77.9433	172.288	303.817	501.846	809.551	552.228	204.95
MSTRG.12152	5542.7	2.00779	0.365821	5.48843	4.05512e-08	1.76276e-06	Up	1586.92	1694.12	3960.08	2105.28	1690.74	8955.37	15141.2	10216	6403.32	3674
MSTRG.2489	2438.02	2.23744	0.408143	5.482	4.20541e-08	1.82609e-06	Up	1948.22	791.637	316.606	538.296	671.298	3546.76	2347.6	4164.19	4738.2	5317.38
MSTRG.4745	531.908	-2.76942	0.50554	-5.47814	4.29817e-08	1.85628e-06	Down	1527.8	878.943	882.331	782.681	567.747	71.2245	252.419	30.1356	263.468	62.3351
MSTRG.21482	261.335	-3.34933	0.611466	-5.47754	4.31279e-08	1.86053e-06	Down	700.084	476.748	425.752	472.531	305.298	45.6282	64.8508	0	96.9561	25.5007
MSTRG.4114	74.5288	2.81443	0.514332	5.47201	4.44967e-08	1.91543e-06	Up	9.3845	25.505	25.8284	20.2977	11.6049	92.3693	42.9013	190.402	247.66	79.3356
HHLG10g0105	31.5449	-2.94455	0.53936	-5.45934	4.77916e-08	2.04619e-06	Down	85.399	53.953	21.6625	72.2599	45.5268	4.45153	3.99082	12.3282	7.37709	8.50025
MSTRG.23002	255.714	-2.13738	0.391554	-5.45872	4.79577e-08	2.0511e-06	Down	565.885	341.375	406.589	369.419	401.707	86.8049	82.8095	32.8752	68.5016	201.173
MSTRG.26313	4520.12	2.31619	0.424419	5.45732	4.83364e-08	2.06507e-06	Up	1446.15	1207.57	1213.1	2887.15	804.308	7212.6	16202.7	6544.9	3260.68	4422.02
MSTRG.24588	738.061	-2.91638	0.534937	-5.45182	4.98561e-08	2.12315e-06	Down	179.244	693.541	2798.63	1378.62	1466.68	195.867	157.637	283.548	65.34	161.505
MSTRG.18003	1588.14	-2.90922	0.533794	-5.45008	5.03467e-08	2.13546e-06	Down	3354.02	2680.97	2818.63	3128.29	2034.43	140.223	368.153	54.792	1031.74	270.119
MSTRG.831	188.183	-3.03992	0.558522	-5.44279	5.24532e-08	2.21714e-06	Down	527.409	248.184	283.279	394.588	224.956	12.2417	40.9059	8.21879	112.764	29.2786
MSTRG.27166	212.438	2.13249	0.391929	5.44101	5.29805e-08	2.23231e-06	Up	62.8762	79.458	74.9856	132.341	44.6342	427.347	182.58	232.866	622.837	264.452
MSTRG.28996	50.5535	2.27902	0.419194	5.43667	5.42852e-08	2.28245e-06	Up	8.44605	32.3718	16.6635	12.9906	16.0683	57.8699	75.8256	109.584	109.603	66.113
HHLG40g0419	9.49665	6.85456	1.26195	5.43171	5.58172e-08	2.33698e-06	Up	0	0	0	0	0	10.0159	24.9426	38.3544	8.43096	13.2226
MSTRG.29365	572.252	-2.89203	0.533008	-5.42586	5.76763e-08	2.40974e-06	Down	2102.13	621.93	953.151	362.112	1004.27	77.9018	192.557	54.792	304.569	49.1125
MSTRG.13636	21.5623	-4.59557	0.849334	-5.41079	6.27481e-08	2.58901e-06	Down	26.2766	71.6103	23.3289	51.1503	34.8146	4.45153	3.99082	0	0	0
HHLG35g0729	22.0836	8.0763	1.49371	5.40688	6.41313e-08	2.63787e-06	Up	0	0	0	0	0	0	78.8187	71.2296	63.2322	7.55577
MSTRG.27614	332.794	-2.23467	0.413379	-5.40586	6.44975e-08	2.64746e-06	Down	697.268	480.672	266.616	1004.33	296.371	113.514	86.8004	61.641	205.505	115.226
MSTRG.15054	35.2244	2.79551	0.517353	5.4035	6.53543e-08	2.67986e-06	Up	3.7538	10.7906	11.6644	6.49528	11.6049	44.5153	44.8967	64.3806	120.141	34.001
MSTRG.4849	148.677	-2.13247	0.395053	-5.39793	6.74145e-08	2.75866e-06	Down	320.012	179.516	153.304	401.083	156.22	73.4503	61.8577	61.641	57.9629	21.7229
MSTRG.21302	601.99	2.56645	0.475526	5.39708	6.77336e-08	2.76886e-06	Up	91.0297	101.039	491.573	101.489	83.9122	1316.54	1239.15	1019.13	998.015	578.017
MSTRG.5253	1211.96	2.21235	0.41009	5.39479	6.86033e-08	2.79866e-06	Up	408.226	363.937	646.543	305.278	426.703	1041.66	724.334	4049.13	1510.2	2643.58
MSTRG.8299	164.454	2.48023	0.459877	5.39325	6.91938e-08	2.81986e-06	Up	46.9225	31.3908	68.3203	33.2883	69.6293	322.736	142.672	598.602	222.367	108.614
MSTRG.1578	314.25	-2.80306	0.521116	-5.37895	7.49197e-08	3.03147e-06	Down	952.527	420.833	548.228	414.074	413.312	41.1767	102.764	39.7242	192.858	17.0005
MSTRG.28179	58.7719	-2.2824	0.42483	-5.37251	7.76476e-08	3.12911e-06	Down	102.291	73.5722	58.3222	137.213	116.942	14.4675	24.9426	6.849	29.5084	23.6118
MSTRG.28050	188.127	-2.12498	0.395855	-5.36808	7.9581e-08	3.20054e-06	Down	350.042	221.698	174.133	600.001	183.893	105.724	55.8715	83.5577	60.0706	46.2791
MSTRG.4644	302.29	-2.29505	0.428727	-5.35317	8.64255e-08	3.44792e-06	Down	570.578	472.824	541.563	445.738	481.156	95.708	125.711	30.1356	216.043	43.4457
MSTRG.3785	34.4462	3.75857	0.702675	5.34895	8.84659e-08	3.51873e-06	Up	11.2614	3.92385	2.49952	0	6.24878	17.8061	105.757	58.9014	65.34	72.7243
MSTRG.20749	118.213	-2.59427	0.486579	-5.33167	9.73158e-08	3.84383e-06	Down	340.657	101.039	311.607	91.7458	169.61	30.0478	13.9679	23.2866	36.8855	63.2796
MSTRG.19186	173.935	2.61386	0.490634	5.32751	9.95675e-08	3.91334e-06	Up	45.0456	30.4098	89.1496	8.1191	71.4147	255.963	151.651	390.393	365.693	331.51
MSTRG.5752	256.276	2.00552	0.37706	5.31882	1.04441e-07	4.08871e-06	Up	94.7835	43.1624	181.632	64.1409	126.761	467.411	299.312	530.112	490.05	265.397
MSTRG.6859	246.001	-2.39937	0.451131	-5.31856	1.04594e-07	4.09067e-06	Down	603.423	311.946	409.088	375.102	369.571	43.4024	100.768	13.698	133.842	99.1695
MSTRG.19918	101.954	2.3704	0.446105	5.31354	1.07516e-07	4.19258e-06	Up	60.9993	31.3908	18.3298	22.7335	32.1366	185.851	318.268	101.365	164.404	84.058
MSTRG.28515	98.2018	-2.16247	0.407035	-5.31273	1.07994e-07	4.20713e-06	Down	154.844	149.106	118.311	279.297	101.766	48.9669	34.9197	12.3282	48.478	34.001
HHLG41g0320	34.8571	3.09737	0.583277	5.31028	1.09455e-07	4.25984e-06	Up	3.7538	3.92385	3.3327	4.05955	21.4244	62.3215	51.8807	50.6826	89.579	57.6128
HHLG33g0050	9.81097	-6.61632	1.24847	-5.29952	1.16106e-07	4.4836e-06	Down	28.1535	25.505	4.99904	25.1692	14.2829	0	0	0	0	0
MSTRG.30898	353.173	2.22974	0.42134	5.29202	1.2097e-07	4.66238e-06	Up	183.936	141.259	40.8255	47.0908	207.995	637.682	455.951	615.04	460.541	741.41
HHLG14g0874	41.9641	2.78452	0.526502	5.28872	1.23175e-07	4.73359e-06	Up	15.0152	21.5812	6.66539	4.05955	6.24878	55.6442	110.745	101.365	46.3703	51.946
MSTRG.28041	3402.32	2.20645	0.417265	5.2879	1.2373e-07	4.75035e-06	Up	1182.45	850.495	1820.48	923.141	1281.89	3753.76	1523.5	11510.4	6580.37	4596.74
MSTRG.16778	106.257	2.68199	0.50789	5.28065	1.28727e-07	4.93268e-06	Up	35.6611	20.6002	19.9962	6.49528	60.7025	86.8049	131.697	195.881	240.282	264.452
MSTRG.30713	61.333	-2.24253	0.424942	-5.27725	1.31135e-07	5.01527e-06	Down	147.337	103.982	104.98	94.1815	55.3464	24.4834	27.9357	27.396	21.0774	6.6113
MSTRG.2203	122.784	-3.05713	0.579498	-5.27547	1.32413e-07	5.05445e-06	Down	368.811	150.087	243.287	147.768	186.571	6.6773	11.9725	10.9584	79.0403	22.6673
MSTRG.4113	30.4622	3.35153	0.635798	5.27137	1.35406e-07	5.15384e-06	Up	6.56915	2.94289	9.16491	6.49528	1.78537	40.0638	24.9426	106.844	82.2019	23.6118
MSTRG.23497	9.52263	6.85986	1.30166	5.27009	1.36354e-07	5.18002e-06	Up	0	0	0	0	0	4.45153	8.97935	35.6148	26.3468	19.8339
MSTRG.26474	24.6511	5.25084	0.997113	5.26604	1.39397e-07	5.28553e-06	Up	2.81535	0	0	0	3.57073	51.1926	4.98853	32.8752	63.2322	87.8359
MSTRG.4274	287.258	-2.55826	0.486867	-5.25455	1.48389e-07	5.58918e-06	Down	625.008	544.434	459.912	392.152	433.844	53.4184	131.697	101.365	122.249	8.50025
MSTRG.27213	65.0119	2.14286	0.408097	5.25086	1.51388e-07	5.69135e-06	Up	23.4613	14.7144	13.3308	50.3384	17.8537	106.837	117.729	87.6671	127.518	90.6693
HHLG14g0662	32.2126	2.94028	0.560179	5.24882	1.53079e-07	5.74408e-06	Up	2.81535	8.82867	11.6644	5.68337	8.03415	17.8061	47.8899	84.9275	85.3635	49.1125
MSTRG.22890	82.9839	-2.83248	0.540024	-5.24511	1.56189e-07	5.84972e-06	Down	178.306	150.087	51.6568	286.604	61.5951	21.1448	17.9587	5.4792	30.5622	26.4452
HHLG4g0303	77.2092	-2.13723	0.407718	-5.24193	1.58902e-07	5.93432e-06	Down	88.2143	111.83	141.64	155.887	131.224	18.919	39.9082	41.094	8.43096	34.9455
MSTRG.14082	13.9002	4.22304	0.80676	5.23456	1.65374e-07	6.15895e-06	Up	0	0.980963	3.3327	0	2.67805	22.2577	21.9495	34.245	33.7239	19.8339
MSTRG.13603	62.1949	-3.49699	0.668685	-5.22965	1.69835e-07	6.31326e-06	Down	158.598	136.354	124.143	77.1314	74.9854	31.1607	0	5.4792	8.43096	5.66683
MSTRG.25004	1353.59	-3.8243	0.731587	-5.22741	1.71905e-07	6.37235e-06	Down	287.166	630.759	6862.85	2088.23	2774.46	164.707	217.5	115.063	258.198	136.948
MSTRG.1824	5927.86	2.3152	0.442981	5.2264	1.72842e-07	6.39514e-06	Up	4046.6	2541.67	707.365	991.342	1631.83	9611.97	3727.43	9837.9	11553.6	14628.9
MSTRG.11126	8.05424	-6.33078	1.21279	-5.22003	1.78898e-07	6.61307e-06	Down	23.4613	20.6002	10.8313	11.3667	14.2829	0	0	0	0	0
MSTRG.2980	85.0043	-2.19166	0.420049	-5.21763	1.81229e-07	6.68127e-06	Down	169.859	56.8958	184.131	114.479	172.288	28.935	40.9059	19.1772	46.3703	17.0005
MSTRG.2778	164.031	2.11705	0.406305	5.2105	1.88328e-07	6.9039e-06	Up	34.7227	65.7245	41.6587	62.517	102.659	381.719	385.114	226.017	238.175	102.003
MSTRG.19205	35.1039	-3.17466	0.609618	-5.20762	1.91274e-07	6.999e-06	Down	70.3838	20.6002	89.9828	25.9811	108.907	13.3546	4.98853	6.849	5.26935	4.72236
MSTRG.31707	24.5522	2.57308	0.495715	5.19065	2.0956e-07	7.62604e-06	Up	13.1383	9.80963	4.16587	4.05955	4.46342	33.3865	51.8807	46.5732	42.1548	35.8899
MSTRG.27991	200.989	-4.85032	0.934955	-5.18776	2.12843e-07	7.73789e-06	Down	280.597	603.292	74.9856	907.715	75.8781	0	13.9679	21.9168	12.6464	18.8894
MSTRG.13880	176.362	-2.16352	0.417439	-5.18285	2.18524e-07	7.90164e-06	Down	400.718	346.28	209.127	245.197	241.024	57.8699	146.663	41.094	46.3703	29.2786
MSTRG.21767	133.949	-3.65831	0.706046	-5.1814	2.20222e-07	7.95578e-06	Down	333.15	376.69	84.1506	390.528	57.1317	13.3546	21.9495	0	47.4242	15.1115
MSTRG.22824	84.01	2.79985	0.541897	5.16677	2.38179e-07	8.54244e-06	Up	22.5228	7.8477	38.326	8.931	27.6732	37.838	123.715	253.413	142.273	177.561
MSTRG.30649	81.7456	4.48824	0.869287	5.16312	2.42864e-07	8.68698e-06	Up	6.56915	2.94289	10.8313	7.30719	7.14147	213.674	323.256	4.1094	235.013	6.6113
MSTRG.10614	29.9117	-5.49787	1.0654	-5.16037	2.46465e-07	8.79993e-06	Down	188.628	35.3147	35.8265	1.62382	31.2439	1.11288	0	1.3698	2.10774	1.88894
MSTRG.30477	56.6623	-3.48997	0.677464	-5.15152	2.58384e-07	9.16791e-06	Down	98.5373	77.4961	109.146	114.479	121.405	0	12.9702	0	13.7003	18.8894
HHLG40g0530	27.5539	3.99588	0.775921	5.14986	2.60676e-07	9.241e-06	Up	0	0	3.3327	7.30719	5.3561	53.4184	20.9518	35.6148	103.279	46.2791
MSTRG.16856	43.5978	2.20499	0.428699	5.14345	2.69737e-07	9.53671e-06	Up	11.2614	20.6002	22.4957	8.1191	15.1756	77.9018	40.9059	95.8859	91.6867	51.946
MSTRG.22024	59.7773	2.79833	0.544189	5.1422	2.71538e-07	9.59187e-06	Up	37.538	5.88578	5.83222	7.30719	18.7463	96.8208	73.8302	145.199	70.6093	136.004
MSTRG.649	258.717	-2.79256	0.543428	-5.13878	2.76529e-07	9.75083e-06	Down	696.33	394.347	305.775	538.296	326.722	36.7251	79.8164	9.58859	166.512	33.0565
MSTRG.19134	21.6599	5.94728	1.16011	5.12649	2.95189e-07	1.03791e-05	Up	0	0	3.3327	0	0	12.2417	63.8531	36.9846	91.6867	8.50025
MSTRG.7239	28.4808	-4.54125	0.88774	-5.11551	3.12891e-07	1.08977e-05	Down	17.8306	14.7144	104.147	27.6049	108.907	4.45153	3.99082	0	3.16161	0
MSTRG.24571	109.609	2.97452	0.581584	5.11451	3.14557e-07	1.09462e-05	Up	20.6459	25.505	34.9933	1.62382	41.0634	230.367	359.174	132.871	168.619	81.2246
MSTRG.21618	60.7337	-2.78069	0.544704	-5.10495	3.30876e-07	1.1444e-05	Down	107.922	112.811	62.488	184.303	63.3805	13.3546	26.938	5.4792	4.21548	26.4452
MSTRG.24173	154.243	2.31191	0.452908	5.10459	3.31515e-07	1.14561e-05	Up	58.1839	10.7906	81.651	69.0123	38.3854	268.205	288.337	360.257	247.66	119.948
MSTRG.30900	33.7013	3.29602	0.64652	5.0981	3.43082e-07	1.18046e-05	Up	1.8769	10.7906	11.6644	3.24764	3.57073	92.3693	77.821	60.2712	62.1784	13.2226
HHLG13g0316	34.1134	-2.64113	0.518641	-5.09241	3.53546e-07	1.21227e-05	Down	67.5684	49.0481	40.8255	83.6267	52.6683	10.0159	3.99082	9.58859	20.0235	3.77789
MSTRG.5867	41.7649	-3.29462	0.646947	-5.09257	3.53249e-07	1.21227e-05	Down	72.2607	46.1053	85.8169	122.598	52.6683	7.79018	1.99541	0	18.9697	9.44472
MSTRG.26021	956.575	-3.91173	0.769435	-5.0839	3.69767e-07	1.26462e-05	Down	2359.26	1394.93	1549.7	2458.46	1207.8	51.1926	80.8141	5.4792	355.154	102.947
HHLG22g0564	18.7374	-5.41497	1.06664	-5.07668	3.84085e-07	1.31021e-05	Down	54.4301	47.0862	11.6644	50.3384	19.639	0	0	0	4.21548	0
MSTRG.8102	97.3485	2.14585	0.422815	5.07515	3.87191e-07	1.31854e-05	Up	45.9841	60.8197	20.8293	42.2193	9.81952	176.948	141.674	172.595	185.481	117.115
MSTRG.4723	22.6827	-7.82687	1.54638	-5.06142	4.16149e-07	1.40991e-05	Down	0	74.5532	20.8293	123.41	8.03415	0	0	0	0	0
MSTRG.26500	3436.71	2.08407	0.412388	5.05366	4.33413e-07	1.45851e-05	Up	1380.46	1957.02	838.173	1532.07	850.727	3538.97	1840.77	11711.8	5461.16	5255.99
MSTRG.28454	182.967	-2.96304	0.586735	-5.05004	4.4171e-07	1.48262e-05	Down	546.178	250.146	287.445	410.826	127.654	34.4994	96.7774	6.849	57.9629	11.3337
MSTRG.27849	48.8562	-2.67433	0.530072	-5.04523	4.52983e-07	1.51661e-05	Down	110.737	89.2676	69.1534	125.034	28.5659	6.6773	8.97935	12.3282	9.48483	28.3342
MSTRG.28553	12.2938	-5.76295	1.14287	-5.0425	4.59479e-07	1.53707e-05	Down	31.9073	20.6002	25.8284	31.6645	10.7122	2.22577	0	0	0	0
HHLG4g0565	102.625	-2.3699	0.470287	-5.03926	4.6734e-07	1.56074e-05	Down	205.521	234.45	129.142	120.975	170.503	26.7092	83.8072	15.0678	22.1313	17.945
MSTRG.21009	54.5033	-2.30692	0.45781	-5.03904	4.6788e-07	1.56123e-05	Down	108.86	92.2105	49.9904	134.777	66.9512	12.2417	8.97935	32.8752	12.6464	25.5007
MSTRG.12922	362.988	3.07504	0.61072	5.03511	4.77574e-07	1.58462e-05	Up	23.4613	50.0291	198.295	103.113	9.81952	1155.17	663.474	226.017	637.592	562.905
MSTRG.21946	45.5284	-3.42247	0.679749	-5.03491	4.78075e-07	1.58462e-05	Down	113.552	97.1153	29.1611	125.034	50.8829	4.45153	6.98394	20.547	0	7.55577
MSTRG.15664	200.864	2.12913	0.423302	5.02982	4.90943e-07	1.62052e-05	Up	76.0145	64.7435	138.307	17.862	76.7708	288.237	194.553	383.544	353.047	415.568
MSTRG.22881	78.7085	-2.88676	0.573955	-5.02959	4.91533e-07	1.62112e-05	Down	227.105	143.221	50.8236	239.513	33.0293	21.1448	9.97705	9.58859	25.2929	27.3897
MSTRG.18002	13.402	-4.92803	0.980198	-5.02759	4.9669e-07	1.63552e-05	Down	30.0304	42.1814	21.6625	23.5454	12.4976	0	1.99541	0	2.10774	0
MSTRG.22940	260.59	-2.10102	0.417899	-5.02758	4.96721e-07	1.63552e-05	Down	715.099	206.983	231.622	717.728	241.024	91.2564	83.8072	153.418	96.9561	68.002
MSTRG.25931	63.9214	-3.01176	0.599108	-5.02707	4.98035e-07	1.63805e-05	Down	87.2759	102.02	140.806	178.62	60.7025	10.0159	8.97935	0	25.2929	25.5007
MSTRG.30175	33.8268	-4.22311	0.841768	-5.01695	5.24984e-07	1.71862e-05	Down	38.4765	62.7816	14.9971	156.699	48.2049	8.90307	3.99082	0	4.21548	0
MSTRG.27628	733.713	2.09445	0.417847	5.01249	5.37288e-07	1.75601e-05	Up	475.794	289.384	173.3	84.4386	369.571	934.822	552.729	1353.36	1585.02	1518.71
HHUNg0213	7.33247	-6.199	1.23785	-5.00786	5.50381e-07	1.79291e-05	Down	9.3845	9.80963	21.6625	14.6144	17.8537	0	0	0	0	0
MSTRG.18088	96.2605	2.03849	0.407294	5.00497	5.58694e-07	1.81553e-05	Up	36.5996	18.6383	37.4928	27.6049	67.8439	163.594	145.665	205.47	190.751	68.9464
MSTRG.28785	34.8534	2.73781	0.547262	5.00274	5.65209e-07	1.83221e-05	Up	16.8921	7.8477	3.3327	3.24764	14.2829	62.3215	43.899	99.9953	40.0471	56.6683
MSTRG.4540	162.944	-2.14496	0.429747	-4.99121	6.00025e-07	1.93717e-05	Down	363.18	381.595	132.475	251.692	200.854	61.2086	102.764	19.1772	75.8787	40.6123
MSTRG.14938	606.728	2.26019	0.452961	4.98982	6.04356e-07	1.94642e-05	Up	138.891	242.298	127.476	182.68	356.181	585.377	670.458	2519.06	755.625	489.236
MSTRG.9128	596.358	2.09387	0.419697	4.989	6.06918e-07	1.95309e-05	Up	193.321	368.842	219.125	210.285	140.151	619.876	318.268	2014.97	1011.72	867.025
MSTRG.22947	548.953	2.01714	0.404401	4.98796	6.10188e-07	1.96202e-05	Up	260.889	306.06	194.13	128.282	198.176	815.743	255.413	1561.57	1130.8	638.463
HHLG4g0082	7.61554	6.53574	1.31048	4.98729	6.1232e-07	1.96523e-05	Up	0	0	0	0	0	12.2417	7.98164	26.0262	24.239	5.66683
MSTRG.15945	11.634	-5.68081	1.13971	-4.98444	6.21415e-07	1.98688e-05	Down	25.3382	24.5241	33.327	12.1786	18.7463	2.22577	0	0	0	0
HHLG43g0418	8.82637	6.75131	1.35682	4.97584	6.49663e-07	2.06557e-05	Up	0	0	0	0	0	20.0319	1.99541	23.2866	31.6161	11.3337
MSTRG.21945	88.5551	-2.9734	0.598404	-4.96889	6.73378e-07	2.13415e-05	Down	204.582	145.183	63.3212	258.999	113.371	8.90307	3.99082	19.1772	54.8013	13.2226
MSTRG.14619	14.1196	7.43078	1.49574	4.96797	6.76567e-07	2.14255e-05	Up	0	0	0	0	0	45.6282	11.9725	41.094	0	42.5012
HHLG46g0247	20.139	-3.6543	0.736043	-4.96479	6.87738e-07	2.17446e-05	Down	45.0456	54.9339	28.3279	39.7836	18.7463	4.45153	0	0	6.32322	3.77789
MSTRG.4537	131.005	-2.12483	0.428215	-4.96207	6.97462e-07	2.19996e-05	Down	318.135	205.021	197.462	205.413	140.151	40.0638	46.8921	21.9168	108.549	26.4452
MSTRG.15234	44.0734	2.36989	0.477901	4.95896	7.08731e-07	2.22867e-05	Up	20.6459	16.6764	9.99809	8.1191	16.0683	60.0957	29.9312	131.501	85.3635	62.3351
MSTRG.18544	112.752	2.49231	0.502789	4.95698	7.15987e-07	2.24948e-05	Up	10.323	35.3147	31.6606	76.3195	16.0683	141.336	123.715	339.71	134.895	218.173
MSTRG.16508	66.5368	-2.412	0.48677	-4.95512	7.2285e-07	2.26925e-05	Down	92.9066	95.1534	66.6539	247.632	58.0244	33.3865	15.9633	10.9584	21.0774	23.6118
HHLG24g0418	7.2318	-6.17799	1.24847	-4.94844	7.4811e-07	2.33596e-05	Down	22.5228	7.8477	14.9971	16.2382	10.7122	0	0	0	0	0
MSTRG.18866	23.6227	-3.88202	0.784498	-4.94841	7.48213e-07	2.33596e-05	Down	76.9529	18.6383	54.1563	34.1002	37.4927	7.79018	4.98853	0	2.10774	0
MSTRG.3304	34.3033	-2.37969	0.480972	-4.94767	7.51069e-07	2.34304e-05	Down	39.4149	63.7626	49.1573	49.5265	85.6976	5.56442	4.98853	16.4376	10.5387	17.945
HHLG45g0721	18.0038	-7.494	1.51873	-4.93439	8.04014e-07	2.50036e-05	Down	20.6459	31.3908	20.8293	107.172	0	0	0	0	0	0
MSTRG.10838	455.736	2.11482	0.429365	4.92545	8.41647e-07	2.60315e-05	Up	187.69	368.842	63.3212	125.846	109.8	725.6	432.006	658.873	620.73	1264.65
HHLG1g0523	26.6368	2.30603	0.468537	4.92177	8.57636e-07	2.64445e-05	Up	12.1999	12.7525	4.16587	11.3667	4.46342	37.838	47.8899	47.943	53.7474	34.001
MSTRG.25988	50.6845	-2.06539	0.420047	-4.91704	8.7862e-07	2.7007e-05	Down	67.5684	54.9339	64.9876	151.015	70.522	17.8061	23.9449	21.9168	10.5387	23.6118
MSTRG.8331	71.1036	-2.78283	0.566247	-4.91452	8.90006e-07	2.73148e-05	Down	184.875	60.8197	63.3212	207.037	105.337	4.45153	17.9587	6.849	35.8316	24.5563
MSTRG.1705	52.8765	2.70369	0.550735	4.90924	9.14278e-07	2.79734e-05	Up	4.69225	14.7144	8.33174	22.7335	19.639	102.385	29.9312	167.115	105.387	53.8349
MSTRG.16460	109.299	-2.46536	0.502747	-4.90378	9.40077e-07	2.86745e-05	Down	99.4757	66.7055	214.959	220.027	324.044	47.854	52.8784	35.6148	11.5926	19.8339
MSTRG.5274	9.91363	6.91489	1.41061	4.90206	9.48371e-07	2.89053e-05	Up	0	0	0	0	0	6.6773	12.9702	60.2712	3.16161	16.056
MSTRG.30973	1393.95	8.16599	1.66591	4.90183	9.49495e-07	2.89174e-05	Up	0	0	23.3289	0	24.9951	1190.79	9250.72	1062.96	2211.02	175.672
MSTRG.185	53.8758	-2.04521	0.417346	-4.90052	9.55834e-07	2.90882e-05	Down	91.9681	67.6864	78.3183	146.956	49.0976	15.5804	20.9518	13.698	33.7239	20.7784
MSTRG.23696	199.353	2.05943	0.420351	4.89932	9.61697e-07	2.92443e-05	Up	50.6763	27.467	100.814	153.451	52.6683	306.043	479.896	342.45	239.229	240.84
HHLG12g0735	15.1677	-4.12447	0.843474	-4.88986	1.00907e-06	3.04984e-05	Down	31.9073	21.5812	37.4928	33.2883	19.639	0	3.99082	0	0	3.77789
MSTRG.21966	148.535	2.22294	0.455343	4.88192	1.05059e-06	3.15794e-05	Up	13.1383	43.1624	76.652	69.0123	59.8098	120.191	165.619	210.949	396.255	330.565
MSTRG.29582	32.7652	3.1015	0.635645	4.87929	1.06466e-06	3.19599e-05	Up	1.8769	5.88578	7.49856	8.1191	10.7122	62.3215	134.69	49.3128	27.4006	19.8339
MSTRG.29705	52.3449	-2.20239	0.451689	-4.87589	1.08322e-06	3.2346e-05	Down	76.9529	70.6293	109.979	84.4386	88.3756	11.1288	33.922	10.9584	29.5084	7.55577
MSTRG.2654	9487.74	2.652	0.543939	4.87555	1.08504e-06	3.23761e-05	Up	1328.85	562.092	5630.59	686.875	4814.24	22458	10968.8	21999	15866	10563
MSTRG.663	12.28	4.51045	0.925556	4.87323	1.09786e-06	3.27342e-05	Up	0	0	2.49952	2.43573	0	31.1607	18.9564	28.7658	11.5926	27.3897
MSTRG.13888	518.631	12.6306	2.59363	4.86986	1.11678e-06	3.32735e-05	Up	0	0	0	0	0	0	1860.72	10.9584	2197.32	1117.31
MSTRG.29353	61.6763	-2.91697	0.599512	-4.86558	1.14123e-06	3.39509e-05	Down	13.1383	126.544	157.47	152.639	94.6244	20.0319	8.97935	19.1772	5.26935	18.8894
MSTRG.3340	171.898	2.49538	0.513268	4.86175	1.16352e-06	3.45367e-05	Up	20.6459	112.811	10.8313	66.5766	48.2049	247.06	272.374	501.346	236.067	203.061
MSTRG.11112	30.527	-3.35982	0.691061	-4.86182	1.16311e-06	3.45367e-05	Down	89.1528	53.953	31.6606	82.8148	20.5317	10.0159	0	5.4792	3.16161	8.50025
MSTRG.2042	401.27	-4.1702	0.85931	-4.85297	1.21627e-06	3.58879e-05	Down	1169.31	691.579	672.371	681.192	587.386	35.6123	60.86	0	101.172	13.2226
MSTRG.11738	438.105	2.09502	0.433485	4.83297	1.34514e-06	3.93403e-05	Up	68.5069	337.451	230.789	109.608	84.8049	592.054	346.204	820.51	913.706	877.414
MSTRG.2823	244.252	2.02628	0.419466	4.83062	1.36109e-06	3.97484e-05	Up	81.6452	55.9149	162.469	91.7458	89.2683	115.74	296.318	591.753	390.986	566.683
HHLG2g0731	8.38368	-6.39301	1.32424	-4.82769	1.38125e-06	4.02486e-05	Down	6.56915	12.7525	11.6644	43.0312	9.81952	0	0	0	0	0
MSTRG.21240	100.893	3.12442	0.647171	4.82781	1.38044e-06	4.02486e-05	Up	28.1535	15.6954	29.9943	3.24764	26.7805	53.4184	37.9128	167.115	387.824	258.785
MSTRG.25217	208.229	2.17507	0.450612	4.82693	1.38652e-06	4.03724e-05	Up	23.4613	22.5621	99.1477	138.025	93.7317	265.979	359.174	339.71	355.154	385.345
MSTRG.18549	46.144	-2.59146	0.537921	-4.81754	1.45337e-06	4.22263e-05	Down	91.0297	54.9339	65.8207	142.084	41.9561	12.2417	7.98164	8.21879	30.5622	6.6113
MSTRG.7851	353.663	-2.09227	0.43433	-4.81723	1.45561e-06	4.22606e-05	Down	852.113	566.997	635.712	509.067	301.727	65.6601	184.575	49.3128	266.629	104.836
MSTRG.27599	5134.84	2.34029	0.486457	4.81088	1.50264e-06	4.33726e-05	Up	834.282	4963.67	961.483	1155.35	553.464	7036.76	7491.77	9324.22	11810.7	7216.71
MSTRG.19141	201.463	2.02202	0.420399	4.80977	1.51103e-06	4.35272e-05	Up	76.9529	73.5722	146.639	73.0719	27.6732	469.637	448.967	232.866	160.188	305.064
HHLG28g0388	53.8249	-2.05435	0.4277	-4.80324	1.5612e-06	4.48676e-05	Down	78.8298	117.716	72.4861	62.517	102.659	17.8061	39.9082	13.698	23.1852	9.44472
MSTRG.10943	80.4122	2.66979	0.556497	4.79748	1.60673e-06	4.60762e-05	Up	7.5076	36.2956	21.6625	37.3478	6.24878	71.2245	120.722	213.689	222.367	67.0575
MSTRG.18012	32.5484	-2.83753	0.591598	-4.79638	1.6156e-06	4.62973e-05	Down	75.076	52.972	54.9895	69.8242	33.0293	0	14.9656	5.4792	11.5926	7.55577
MSTRG.14554	51.5087	2.49677	0.521664	4.78616	1.69999e-06	4.8298e-05	Up	20.6459	6.86674	16.6635	14.6144	18.7463	20.0319	140.676	69.8598	83.2558	123.726
MSTRG.24949	23.6538	5.49057	1.14728	4.78572	1.70373e-06	4.83696e-05	Up	0	0	4.99904	0	0	56.757	18.9564	102.735	47.4242	5.66683
HHLG40g0462	9.60065	5.69129	1.18985	4.7832	1.72523e-06	4.89102e-05	Up	0	1.96193	0	0	0	25.5963	8.97935	15.0678	27.4006	17.0005
MSTRG.4204	145.162	5.46168	1.1425	4.78045	1.74904e-06	4.94763e-05	Up	2.81535	4.90481	0	24.3573	0	334.978	289.335	453.404	281.383	60.4462
HHLG12g0529	7.41687	-6.21327	1.29992	-4.77973	1.75532e-06	4.95866e-05	Down	27.2151	9.80963	4.99904	17.862	14.2829	0	0	0	0	0
MSTRG.30287	10.3303	-6.69311	1.40127	-4.77647	1.78398e-06	5.03246e-05	Down	15.9537	18.6383	4.16587	60.0813	4.46342	0	0	0	0	0
MSTRG.28583	29.1632	2.78868	0.583898	4.77596	1.7885e-06	5.04165e-05	Up	13.1383	1.96193	1.66635	14.6144	5.3561	55.6442	54.8738	56.1618	40.0471	48.1681
HHLG17g0326	29.3011	-2.92984	0.613798	-4.77329	1.8124e-06	5.09098e-05	Down	62.8762	35.3147	57.489	58.4575	45.5268	4.45153	17.9587	0	5.26935	5.66683
MSTRG.9917	1043.37	-2.44378	0.512028	-4.77275	1.81728e-06	5.10107e-05	Down	1700.47	803.409	2165.42	1033.56	3111	784.583	346.204	115.063	272.952	101.058
MSTRG.784	378.437	-2.26017	0.473829	-4.77001	1.84214e-06	5.16358e-05	Down	687.884	628.797	281.613	1189.45	343.683	100.159	309.289	65.7504	92.7406	85.0025
HHLG32g0446	15.553	-4.84586	1.01678	-4.7659	1.88012e-06	5.26262e-05	Down	16.8921	27.467	50.8236	26.793	28.5659	0	4.98853	0	0	0
MSTRG.25137	264.968	2.65338	0.557302	4.76112	1.9252e-06	5.37743e-05	Up	92.9066	111.83	39.9923	82.0029	36.6	202.545	150.653	1343.77	255.037	334.343
MSTRG.5474	178.556	-2.2093	0.464408	-4.75724	1.96253e-06	5.46636e-05	Down	264.643	267.803	125.809	647.904	162.468	37.838	64.8508	34.245	105.387	74.6133
MSTRG.30977	16.6196	3.39635	0.71504	4.74988	2.03542e-06	5.63075e-05	Up	4.69225	2.94289	4.16587	0	2.67805	13.3546	21.9495	54.792	29.5084	32.112
MSTRG.19103	134.073	2.02483	0.42646	4.748	2.05438e-06	5.67451e-05	Up	19.7075	35.3147	62.488	97.4291	49.0976	210.335	328.245	161.636	260.306	116.17
MSTRG.3679	65.6193	-3.89722	0.822052	-4.74085	2.12826e-06	5.85825e-05	Down	229.92	46.1053	21.6625	268.742	48.2049	0	15.9633	16.4376	6.32322	2.83342
MSTRG.21935	28.7842	4.88447	1.03056	4.73963	2.14107e-06	5.88194e-05	Up	0	0	0	5.68337	3.57073	79.0147	7.98164	136.98	34.7777	19.8339
MSTRG.3493	15.1241	7.53128	1.58916	4.73916	2.14602e-06	5.89082e-05	Up	0	0	0	0	0	79.0147	49.8853	5.4792	16.8619	0
MSTRG.29726	53.5077	4.55878	0.962179	4.73798	2.15863e-06	5.92134e-05	Up	0	16.6764	0	0	5.3561	106.837	49.8853	228.756	64.2861	63.2796
MSTRG.26684	1965.92	2.40794	0.508299	4.73724	2.16645e-06	5.93869e-05	Up	289.981	542.472	1290.59	824.9	168.717	4381.42	6215.7	2330.03	2465	1150.37
MSTRG.17387	232.566	-2.04439	0.431798	-4.7346	2.19493e-06	6.00652e-05	Down	220.536	454.186	191.63	815.969	189.249	63.4343	123.715	115.063	80.0942	71.7799
MSTRG.24420	403.382	4.85794	1.02698	4.73033	2.2415e-06	6.12332e-05	Up	26.2766	0	14.164	79.5671	14.2829	478.54	1027.64	1371.17	930.568	91.6138
HHLG1g0909	25.8648	-2.33626	0.494108	-4.72824	2.26471e-06	6.1691e-05	Down	61.9377	28.4479	41.6587	58.4575	24.9951	8.90307	4.98853	12.3282	8.43096	8.50025
MSTRG.3677	136.208	-2.9793	0.630415	-4.72594	2.29059e-06	6.22749e-05	Down	321.888	198.154	74.1525	447.362	167.824	40.0638	36.9151	0	37.9393	37.7789
MSTRG.7293	59.4266	-2.20225	0.466058	-4.72527	2.29813e-06	6.24373e-05	Down	106.983	99.0772	67.4871	121.786	92.8391	13.3546	21.9495	17.8074	46.3703	6.6113
MSTRG.13634	82.3162	-2.39601	0.507141	-4.72454	2.30637e-06	6.25969e-05	Down	80.7067	97.1153	231.622	79.5671	202.639	4.45153	27.9357	35.6148	29.5084	34.001
MSTRG.29402	47.9378	-2.8601	0.605513	-4.72344	2.3189e-06	6.28298e-05	Down	120.122	16.6764	174.967	38.1597	71.4147	13.3546	9.97705	12.3282	6.32322	16.056
MSTRG.17039	103.665	2.26268	0.479433	4.7195	2.36428e-06	6.40159e-05	Up	55.3686	8.82867	44.9914	27.6049	41.9561	93.4822	343.211	132.871	139.111	149.227
MSTRG.709	66.3035	-2.45174	0.520489	-4.71045	2.4717e-06	6.65619e-05	Down	106.983	88.2867	87.4833	185.927	92.8391	10.0159	31.9266	5.4792	11.5926	42.5012
MSTRG.14064	50.385	-2.04123	0.433325	-4.71063	2.46949e-06	6.65619e-05	Down	59.1224	86.3247	70.8198	124.222	65.1659	6.6773	26.938	20.547	14.7542	29.2786
MSTRG.10933	6560.33	2.24943	0.477583	4.71003	2.47686e-06	6.66557e-05	Up	2689.6	1387.08	2392.04	3020.3	1910.34	5879.36	29976.1	9300.94	5445.35	3602.22
MSTRG.2836	60.3955	-2.43554	0.51759	-4.70555	2.53186e-06	6.79062e-05	Down	121.06	75.5341	49.9904	206.225	56.239	24.4834	13.9679	28.7658	21.0774	6.6113
MSTRG.17721	58.0621	-2.16002	0.459452	-4.70129	2.5852e-06	6.91037e-05	Down	107.922	59.8387	56.6558	186.739	63.3805	17.8061	19.9541	16.4376	35.8316	16.056
MSTRG.31290	76.1316	4.19742	0.892943	4.70066	2.59323e-06	6.92718e-05	Up	0	3.92385	8.33174	16.2382	10.7122	37.838	13.9679	27.396	306.676	336.232
MSTRG.3133	21.1627	3.78671	0.806305	4.69637	2.64825e-06	7.06941e-05	Up	3.7538	3.92385	3.3327	3.24764	0	45.6282	13.9679	101.365	23.1852	13.2226
MSTRG.31434	12.5146	-6.96852	1.48413	-4.69537	2.66126e-06	7.09937e-05	Down	35.6611	29.4289	30.8274	29.2287	0	0	0	0	0	0
MSTRG.11633	74.126	3.00523	0.640849	4.68945	2.73935e-06	7.28328e-05	Up	29.092	9.80963	18.3298	0	24.9951	52.3055	155.642	150.678	164.404	136.004
MSTRG.4747	19.9657	-3.0968	0.66041	-4.68921	2.74268e-06	7.28724e-05	Down	45.9841	39.2385	41.6587	12.1786	40.1707	4.45153	7.98164	0	4.21548	3.77789
MSTRG.20510	24.0172	2.59525	0.553535	4.68849	2.75223e-06	7.30774e-05	Up	7.5076	8.82867	1.66635	8.1191	8.03415	41.1767	23.9449	52.0524	64.2861	24.5563
MSTRG.12787	104.242	-2.11289	0.450714	-4.68787	2.76066e-06	7.32522e-05	Down	133.26	125.563	227.456	92.5577	268.698	42.2896	28.9335	10.9584	48.478	64.2241
MSTRG.14517	73.5017	2.91507	0.622584	4.6822	2.8381e-06	7.52067e-05	Up	9.3845	20.6002	0	18.6739	37.4927	115.74	140.676	99.9953	169.673	122.781
MSTRG.14964	320.723	-2.01451	0.430261	-4.68206	2.8401e-06	7.52097e-05	Down	254.32	421.814	784.017	565.089	546.322	65.6601	245.435	61.641	185.481	77.4467
MSTRG.21192	48.6701	-3.21839	0.687627	-4.68043	2.86274e-06	7.57589e-05	Down	165.167	92.2105	67.4871	78.7552	35.7073	5.56442	0	10.9584	24.239	6.6113
MSTRG.4526	2472.42	4.69865	1.00601	4.67056	3.00377e-06	7.91224e-05	Up	119.183	65.7245	411.588	47.0908	273.161	1433.39	18391.7	1962.92	1648.25	371.177
HHLG4g0099	26.6768	-2.88909	0.619153	-4.6662	3.06822e-06	8.05244e-05	Down	79.7683	20.6002	14.9971	55.2098	64.2732	4.45153	5.98623	8.21879	9.48483	3.77789
MSTRG.11286	434.609	4.00955	0.859287	4.66614	3.06914e-06	8.05244e-05	Up	15.0152	141.259	47.4909	12.9906	37.4927	675.52	42.9013	1293.09	1133.96	946.361
MSTRG.20492	930.934	-2.30146	0.493786	-4.66084	3.14927e-06	8.2301e-05	Down	1920.07	1485.18	1046.47	2159.68	1128.35	83.4662	373.142	168.485	800.942	143.56
MSTRG.12304	73.0247	-2.4281	0.520979	-4.66064	3.15227e-06	8.23254e-05	Down	95.7219	51.0101	171.634	48.7146	249.059	24.4834	23.9449	10.9584	35.8316	18.8894
HHLG1g0262	66.3172	2.10341	0.451516	4.65855	3.18442e-06	8.30559e-05	Up	15.9537	8.82867	48.3241	17.862	33.922	121.304	110.745	82.1879	147.542	76.5022
MSTRG.28978	58.4893	-2.00067	0.43008	-4.65186	3.28958e-06	8.54385e-05	Down	114.491	103.982	124.143	47.0908	78.5561	7.79018	23.9449	24.6564	25.2929	34.9455
MSTRG.25072	3019.19	2.01075	0.433293	4.64063	3.47349e-06	8.94807e-05	Up	1566.27	249.165	1121.45	1718.81	1346.17	3818.3	4304.1	9042.04	4354.59	2670.97
MSTRG.30953	21.4349	-3.22499	0.69563	-4.63607	3.55091e-06	9.09881e-05	Down	51.6148	47.0862	14.9971	43.8431	36.6	2.22577	1.99541	0	8.43096	7.55577
MSTRG.238	19.9633	3.74617	0.808536	4.63327	3.5993e-06	9.20064e-05	Up	0	0	4.16587	3.24764	6.24878	54.5313	9.97705	36.9846	49.5319	34.9455
MSTRG.20130	307.384	2.32685	0.50265	4.62915	3.67162e-06	9.34349e-05	Up	130.445	103.001	87.4833	35.724	154.434	343.881	1219.2	446.555	415.225	137.893
MSTRG.7012	7.18956	-6.16805	1.33336	-4.62596	3.72871e-06	9.47663e-05	Down	29.092	6.86674	14.9971	4.87146	16.0683	0	0	0	0	0
MSTRG.1419	3250.24	2.06465	0.447157	4.61729	3.88783e-06	9.81208e-05	Up	763.898	2890.9	844.838	986.47	784.669	5480.95	1645.22	9069.44	5641.37	4394.63
MSTRG.28505	3663.24	2.07057	0.44859	4.61572	3.9173e-06	9.87392e-05	Up	935.635	3191.07	825.675	1406.23	685.581	6225.47	1986.43	9636.54	6959.76	4779.97
HHLG19g0701	53.487	-2.22773	0.482772	-4.61446	3.94117e-06	9.92152e-05	Down	113.552	49.0481	95.815	114.479	67.8439	17.8061	11.9725	13.698	42.1548	8.50025
MSTRG.21822	53.1855	-3.05241	0.663047	-4.60361	4.15233e-06	0.000103808	Down	231.797	52.972	133.308	27.6049	28.5659	20.0319	5.98623	16.4376	9.48483	5.66683
MSTRG.178	774.238	2.16018	0.470101	4.59513	4.32473e-06	0.000107542	Up	131.383	142.24	770.686	194.046	176.751	1525.76	1926.57	889	1198.25	787.69
MSTRG.14561	242.116	2.57032	0.559862	4.59099	4.41158e-06	0.000109554	Up	46.9225	100.058	48.3241	90.9339	62.4878	646.585	227.477	965.708	75.8787	156.782
MSTRG.16509	13.8423	-4.37995	0.954413	-4.58916	4.45036e-06	0.000110289	Down	14.0768	42.1814	41.6587	13.8025	20.5317	3.33865	0	0	0	2.83342
HHLG38g0320	64.8171	2.22816	0.486501	4.57998	4.65025e-06	0.000114813	Up	32.8458	6.86674	11.6644	36.5359	25.8878	54.5313	128.704	128.761	149.65	72.7243
MSTRG.28001	7.4082	-6.21173	1.3571	-4.57722	4.71187e-06	0.000116262	Down	34.7227	7.8477	9.99809	17.0501	4.46342	0	0	0	0	0
MSTRG.29702	53.1431	-3.1378	0.686176	-4.57288	4.81064e-06	0.000118186	Down	45.0456	49.0481	68.3203	259.811	55.3464	15.5804	11.9725	0	16.8619	9.44472
MSTRG.18090	114.365	-2.255	0.49329	-4.57135	4.84597e-06	0.00011898	Down	159.537	144.202	125.809	394.588	122.298	22.2577	61.8577	13.698	29.5084	69.8909
MSTRG.15313	145.167	2.01301	0.440451	4.57033	4.8695e-06	0.000119411	Up	86.3374	65.7245	61.6549	11.3667	63.3805	235.931	247.431	282.179	282.437	115.226
HHUNg1358	10.6075	7.01858	1.5369	4.56671	4.95443e-06	0.000121344	Up	0	0	0	0	0	20.0319	45.8944	23.2866	16.8619	0
MSTRG.26746	111.097	-3.10021	0.679059	-4.56545	4.98419e-06	0.000121923	Down	191.444	129.487	281.613	180.244	212.459	48.9669	41.9036	0	21.0774	3.77789
MSTRG.30102	401.752	2.23152	0.489243	4.56116	5.08714e-06	0.000124288	Up	142.644	175.592	122.477	103.113	161.576	274.882	1629.25	868.453	329.861	209.673
MSTRG.24055	99.4633	2.2327	0.490789	4.54921	5.38471e-06	0.000130675	Up	19.7075	39.2385	41.6587	36.5359	37.4927	86.8049	89.7935	63.0108	213.936	366.455
MSTRG.6439	172.129	-2.42905	0.534018	-4.54863	5.39967e-06	0.000130959	Down	248.689	310.965	89.1496	693.371	109.8	45.6282	82.8095	31.5054	80.0942	29.2786
MSTRG.17313	20.789	4.30976	0.948317	4.54464	5.5029e-06	0.000132895	Up	5.6307	0	0	0	4.46342	60.0957	20.9518	12.3282	50.5858	53.8349
MSTRG.4045	132.389	6.04465	1.33011	4.54449	5.50697e-06	0.000132912	Up	15.9537	3.92385	0	0	0	283.785	121.72	336.971	496.373	65.1686
MSTRG.7523	355.084	2.55295	0.562714	4.53686	5.7099e-06	0.000136897	Up	88.2143	203.059	40.8255	151.827	33.0293	565.345	482.889	1486.23	198.128	301.287
MSTRG.28721	48.7407	-2.45686	0.541647	-4.53592	5.73535e-06	0.000137424	Down	87.2759	119.677	99.9809	47.0908	58.0244	26.7092	3.99082	13.698	25.2929	5.66683
MSTRG.6560	35.2868	2.73469	0.60367	4.53011	5.89527e-06	0.000140916	Up	4.69225	21.5812	4.99904	11.3667	3.57073	97.9337	43.899	76.7088	66.3938	21.7229
MSTRG.28513	27.3924	-3.12018	0.689522	-4.52514	6.03543e-06	0.000143834	Down	75.076	20.6002	16.6635	101.489	32.1366	6.6773	2.99312	2.7396	4.21548	11.3337
HHLG42g0052	12.9845	7.31261	1.61777	4.52018	6.17857e-06	0.000146981	Up	0	0	0	0	0	42.2896	7.98164	6.849	0	72.7243
MSTRG.31005	69.1316	-3.65054	0.808667	-4.51427	6.35348e-06	0.000150502	Down	127.629	131.449	94.9818	224.087	62.4878	6.6773	0	0	32.67	11.3337
HHLG26g0292	25.2182	-2.22441	0.492959	-4.51236	6.41094e-06	0.000151602	Down	27.2151	32.3718	31.6606	55.2098	61.5951	8.90307	5.98623	5.4792	10.5387	13.2226
MSTRG.30663	19.9858	-3.10846	0.689245	-4.50995	6.48418e-06	0.000153061	Down	54.4301	41.2004	8.33174	53.586	21.4244	6.6773	1.99541	4.1094	5.26935	2.83342
HHLG41g0343	20.7283	4.10125	0.90941	4.50979	6.48923e-06	0.00015309	Up	0	3.92385	4.16587	3.24764	0	44.5153	55.8715	64.3806	27.4006	3.77789
HHLG1g0862	46.9299	2.73377	0.606642	4.50639	6.59404e-06	0.000155011	Up	2.81535	4.90481	6.66539	34.1002	12.4976	112.401	114.736	52.0524	61.1245	68.002
MSTRG.1221	93.0796	-3.75582	0.833669	-4.50517	6.63194e-06	0.000155717	Down	11.2614	45.1243	434.084	22.7335	353.503	22.2577	19.9541	8.21879	4.21548	9.44472
MSTRG.16981	53.537	2.72069	0.604195	4.503	6.70011e-06	0.00015704	Up	12.1999	10.7906	10.8313	6.49528	30.3512	65.6601	34.9197	56.1618	64.2861	243.674
HHLG24g0339	5.95008	-5.89594	1.31049	-4.49905	6.8258e-06	0.000159683	Down	11.2614	7.8477	8.33174	9.74291	22.3171	0	0	0	0	0
HHUNg1300	6.14296	6.22537	1.38442	4.49673	6.9005e-06	0.000160916	Up	0	0	0	0	0	18.919	3.99082	21.9168	5.26935	11.3337
MSTRG.30527	48.713	-2.15672	0.479734	-4.49565	6.93578e-06	0.000161611	Down	85.399	62.7816	66.6539	154.263	28.5659	17.8061	13.9679	19.1772	25.2929	13.2226
MSTRG.24884	136.999	-3.52301	0.783687	-4.49543	6.94301e-06	0.000161685	Down	232.736	39.2385	349.933	65.7647	573.103	22.2577	56.8692	0	16.8619	13.2226
MSTRG.15822	59.8808	-2.47491	0.550918	-4.49234	7.04442e-06	0.000163719	Down	44.1072	86.3247	100.814	214.344	61.5951	15.5804	22.9472	21.9168	27.4006	3.77789
MSTRG.13643	146.935	-2.73683	0.609447	-4.49068	7.09954e-06	0.000164848	Down	197.075	313.908	184.131	365.359	217.815	31.1607	31.9266	0	86.4174	41.5568
MSTRG.25900	29.8489	-4.01711	0.895217	-4.4873	7.21305e-06	0.00016719	Down	59.1224	78.477	23.3289	83.6267	36.6	8.90307	0	0	8.43096	0
MSTRG.31273	11.274	-6.81694	1.52212	-4.47857	7.51441e-06	0.000172966	Down	28.1535	39.2385	27.4947	0	17.8537	0	0	0	0	0
MSTRG.4543	80.4672	-3.45387	0.771901	-4.4745	7.65905e-06	0.00017599	Down	67.5684	81.4199	103.314	388.093	97.3025	0	37.9128	5.4792	17.9158	5.66683
MSTRG.8626	44.0524	-2.92601	0.654852	-4.4682	7.88817e-06	0.000180629	Down	78.8298	112.811	58.3222	96.6172	42.8488	22.2577	4.98853	6.849	0	17.0005
MSTRG.25214	87.4055	2.26292	0.507119	4.46231	8.10814e-06	0.000185027	Up	65.6915	27.467	13.3308	29.2287	15.1756	91.2564	233.463	193.142	57.9629	147.338
HHLG29g0344	26.2247	2.9404	0.659647	4.45753	8.29089e-06	0.000188548	Up	0	8.82867	4.16587	5.68337	11.6049	31.1607	34.9197	30.1356	88.5251	47.2236
MSTRG.2609	38.6359	-3.05005	0.684546	-4.45558	8.36676e-06	0.000190056	Down	148.275	43.1624	53.3231	58.4575	41.9561	5.56442	4.98853	0	22.1313	8.50025
MSTRG.26130	508.31	-2.5733	0.577566	-4.45542	8.37285e-06	0.000190086	Down	1924.76	547.377	764.02	339.378	776.634	134.659	234.461	65.7504	277.168	18.8894
HHLG12g0893	5.57123	-5.80129	1.30615	-4.44151	8.93313e-06	0.000201582	Down	5.6307	14.7144	11.6644	12.9906	10.7122	0	0	0	0	0
MSTRG.29787	36.2039	2.91368	0.656418	4.43876	9.04781e-06	0.000203781	Up	11.2614	6.86674	4.99904	3.24764	16.0683	25.5963	37.9128	124.652	110.656	20.7784
MSTRG.28448	1441.58	2.00366	0.451566	4.43713	9.11645e-06	0.00020521	Up	379.134	450.262	264.116	1382.68	400.815	2420.52	4460.74	1695.81	1754.69	1207.04
HHLG45g0336	10.9995	5.27827	1.18986	4.43605	9.16263e-06	0.000206017	Up	0	2.94289	0	0	0	14.4675	8.97935	23.2866	44.2626	16.056
MSTRG.17818	50.6574	-2.19295	0.494423	-4.43537	9.19145e-06	0.000206548	Down	120.122	39.2385	39.1592	151.015	66.0586	26.7092	19.9541	15.0678	17.9158	11.3337
MSTRG.7893	114.414	2.41313	0.545203	4.42611	9.59481e-06	0.00021392	Up	21.5844	19.6193	28.3279	96.6172	14.2829	370.59	99.7705	132.871	224.474	136.004
MSTRG.3492	10.8887	7.05683	1.5964	4.42045	9.84957e-06	0.000218864	Up	0	0	0	0	0	28.935	9.97705	10.9584	59.0167	0
MSTRG.11737	277.738	2.57403	0.582454	4.41928	9.90298e-06	0.000219805	Up	68.5069	61.8007	177.466	40.5955	50.8829	238.157	54.8738	497.237	693.447	894.415
MSTRG.2703	36.1269	-3.0163	0.683917	-4.41033	1.03212e-05	0.000227944	Down	55.3686	63.7626	88.3164	49.5265	65.1659	1.11288	4.98853	0	17.9158	15.1115
MSTRG.4681	26.5646	-2.23478	0.508331	-4.39632	1.10101e-05	0.000241005	Down	46.9225	62.7816	24.162	45.4669	40.1707	13.3546	7.98164	5.4792	4.21548	15.1115
MSTRG.4902	103.655	-2.67844	0.609525	-4.39431	1.11127e-05	0.000242195	Down	235.551	185.402	147.472	230.582	98.1952	14.4675	38.9105	0	54.8013	31.1676
MSTRG.23425	112.246	-2.78413	0.633745	-4.39315	1.11721e-05	0.000242958	Down	265.581	226.602	134.974	215.156	138.366	26.7092	49.8853	0	54.8013	10.3892
HHLG15g0309	40.997	-2.53378	0.577377	-4.38843	1.14174e-05	0.000247481	Down	132.321	57.8768	69.1534	58.4575	32.1366	14.4675	15.9633	2.7396	22.1313	4.72236
MSTRG.2307	82.9034	-2.12816	0.485055	-4.38745	1.14685e-05	0.000248318	Down	106.983	86.3247	66.6539	276.861	138.366	15.5804	52.8784	21.9168	20.0235	43.4457
MSTRG.20034	20.0109	4.01318	0.915237	4.38485	1.16068e-05	0.000251038	Up	0	6.86674	0	4.87146	0	63.4343	36.9151	34.245	35.8316	17.945
HHLG20g0199	30.0848	2.70498	0.618465	4.3737	1.2216e-05	0.000262973	Up	9.3845	17.6573	7.49856	5.68337	0	48.9669	40.9059	57.5316	71.6632	41.5568
MSTRG.6472	23.2842	4.05323	0.926971	4.37256	1.228e-05	0.000264019	Up	0	5.88578	0	7.30719	0	25.5963	51.8807	73.9692	47.4242	20.7784
HHLG37g0288	61.0362	2.1147	0.483986	4.36934	1.24622e-05	0.000267358	Up	24.3997	11.7716	27.4947	37.3478	13.3902	83.4662	158.635	43.8336	57.9629	152.06
MSTRG.29804	27.2783	-4.88671	1.11859	-4.36865	1.25016e-05	0.000267772	Down	0	70.6293	51.6568	103.924	37.4927	4.45153	0	2.7396	0	1.88894
HHLG5g0945	6.78132	-6.08516	1.39487	-4.36252	1.28573e-05	0.000274356	Down	25.3382	3.92385	24.9952	7.30719	6.24878	0	0	0	0	0
MSTRG.27000	25.1967	-4.00533	0.9181	-4.36263	1.28506e-05	0.000274356	Down	55.3686	17.6573	46.6577	55.2098	62.4878	0	2.99312	0	11.5926	0
HHLG41g0779	5.00724	5.93776	1.36237	4.35842	1.31007e-05	0.000278951	Up	0	0	0	0	0	10.0159	17.9587	8.21879	6.32322	7.55577
MSTRG.23934	52.9113	-2.14407	0.491958	-4.35823	1.31117e-05	0.000279037	Down	56.307	31.3908	78.3183	180.244	84.8049	18.919	19.9541	24.6564	23.1852	11.3337
HHLG27g0272	6.55893	6.33071	1.45266	4.35802	1.31245e-05	0.000279159	Up	0	0	0	0	0	11.1288	4.98853	5.4792	5.26935	38.7233
MSTRG.29114	11.596	-4.11629	0.944572	-4.35784	1.31353e-05	0.000279239	Down	22.5228	25.505	18.3298	11.3667	32.1366	0	3.99082	0	2.10774	0
HHLG9g0157	51.0542	2.32949	0.534624	4.35725	1.31709e-05	0.000279547	Up	16.8921	7.8477	13.3308	17.862	28.5659	32.2736	74.8279	171.225	40.0471	107.67
MSTRG.10783	98.3577	2.65278	0.611186	4.34039	1.42232e-05	0.000299485	Up	40.3534	3.92385	48.3241	6.49528	35.7073	80.1276	95.7797	308.205	146.488	218.173
MSTRG.12113	541.126	2.54125	0.586095	4.3359	1.45162e-05	0.000304526	Up	44.1072	98.0963	363.264	214.344	73.2	1075.05	2032.33	550.659	770.379	189.839
MSTRG.640	94.9366	-2.43404	0.56165	-4.33374	1.46596e-05	0.000307211	Down	235.551	114.773	190.797	138.025	122.298	21.1448	55.8715	12.3282	54.8013	3.77789
HHLG31g0359	19.909	4.6429	1.07273	4.32811	1.50397e-05	0.00031336	Up	0	0	7.49856	0	0	31.1607	61.8577	32.8752	50.5858	15.1115
MSTRG.22834	14.6003	-6.60331	1.52627	-4.32644	1.51537e-05	0.000315008	Down	51.6148	43.1624	46.6577	0	3.57073	0	0.997705	0	0	0
MSTRG.6598	77.9516	-3.60107	0.834788	-4.31376	1.60501e-05	0.000331977	Down	129.506	168.726	189.964	77.9433	154.434	0	32.9243	0	23.1852	2.83342
HHLG9g1016	32.8736	-2.34879	0.544811	-4.3112	1.62371e-05	0.000335672	Down	106.983	53.953	59.9885	29.2287	24.9951	10.0159	18.9564	6.849	7.37709	10.3892
MSTRG.28144	83.6717	-2.18027	0.505896	-4.30972	1.63461e-05	0.000337223	Down	131.383	127.525	216.625	58.4575	151.756	16.6932	41.9036	17.8074	63.2322	11.3337
HHLG32g0629	47.581	2.99857	0.696095	4.3077	1.64961e-05	0.000339965	Up	3.7538	10.7906	16.6635	17.862	3.57073	143.562	21.9495	184.923	27.4006	45.3346
MSTRG.28425	116.21	-2.46363	0.571967	-4.3073	1.65262e-05	0.000340232	Down	256.197	88.2867	232.456	261.435	145.507	5.56442	50.883	27.396	81.148	13.2226
MSTRG.7754	57.578	-3.64007	0.847712	-4.29399	1.75491e-05	0.000358693	Down	127.629	140.278	51.6568	179.432	33.922	0	0	10.9584	25.2929	6.6113
HHLG11g0780	9.44721	-6.56342	1.52879	-4.29322	1.76098e-05	0.000359749	Down	0	24.5241	27.4947	21.9216	20.5317	0	0	0	0	0
MSTRG.8098	145.677	2.39734	0.558616	4.29157	1.77417e-05	0.000362256	Up	48.7994	64.7435	26.6616	78.7552	13.3902	239.27	434.002	327.382	181.266	42.5012
MSTRG.13995	18.3366	-2.28659	0.532891	-4.29092	1.77933e-05	0.000362938	Down	31.9073	29.4289	23.3289	29.2287	38.3854	5.56442	4.98853	4.1094	12.6464	3.77789
MSTRG.9079	174.562	-2.36356	0.551184	-4.28815	1.80171e-05	0.000367	Down	452.333	321.756	162.469	332.071	193.712	21.1448	146.663	13.698	70.6093	31.1676
MSTRG.20509	19.88	2.94667	0.68875	4.27829	1.88332e-05	0.000381217	Up	7.5076	5.88578	3.3327	0	6.24878	22.2577	18.9564	64.3806	30.5622	39.6678
MSTRG.8552	16.3628	4.52907	1.0589	4.27716	1.89293e-05	0.000382772	Up	0	0	4.99904	1.62382	0	37.838	53.8761	5.4792	48.478	11.3337
MSTRG.26475	8.38323	5.49033	1.28394	4.27614	1.90159e-05	0.000383939	Up	0	0	0	0	1.78537	20.0319	3.99082	23.2866	25.2929	9.44472
MSTRG.20564	23.9792	2.19474	0.513422	4.27473	1.91368e-05	0.000386182	Up	15.0152	5.88578	9.16491	3.24764	9.81952	62.3215	36.9151	30.1356	29.5084	37.7789
MSTRG.22460	31.8101	3.57902	0.837593	4.27298	1.92874e-05	0.000388827	Up	15.0152	0	0	1.62382	8.03415	55.6442	57.8669	82.1879	31.6161	66.113
MSTRG.24799	15.3439	-2.62725	0.615601	-4.26779	1.97423e-05	0.000396991	Down	15.9537	34.3337	33.327	22.7335	25.8878	8.90307	3.99082	1.3698	3.16161	3.77789
MSTRG.7232	647.786	-2.37277	0.556743	-4.26187	2.02725e-05	0.00040642	Down	1640.41	981.944	1038.13	1099.33	670.405	62.3215	301.307	31.5054	517.45	135.059
MSTRG.28349	32.5183	2.74516	0.644574	4.25887	2.05459e-05	0.000411486	Up	5.6307	9.80963	12.4976	0	14.2829	51.1926	35.9174	90.4067	69.5555	35.8899
HHLG42g0518	6.76295	6.37252	1.50072	4.24632	2.17313e-05	0.000431749	Up	0	0	0	0	0	14.4675	39.9082	5.4792	2.10774	5.66683
MSTRG.7184	205.841	-2.52408	0.594469	-4.24595	2.17674e-05	0.000432184	Down	492.686	228.564	130.808	763.195	138.366	65.6601	33.922	31.5054	153.865	19.8339
MSTRG.25593	1030.31	2.25037	0.530086	4.2453	2.18301e-05	0.000432848	Up	449.518	253.088	390.759	137.213	558.82	1098.42	4136.49	1794.44	1197.2	287.119
MSTRG.7673	74.3024	-2.59951	0.612834	-4.24178	2.2175e-05	0.000438812	Down	217.72	121.639	124.143	88.4981	86.5903	13.3546	16.961	0	31.6161	42.5012
HHLG4g0625	35.6709	2.7226	0.642146	4.23985	2.2367e-05	0.00044217	Up	11.2614	5.88578	16.6635	12.9906	0	33.3865	89.7935	45.2034	89.579	51.946
MSTRG.23751	16.2425	-3.89311	0.918264	-4.23964	2.23876e-05	0.000442358	Down	47.861	17.6573	29.1611	28.4168	29.4585	0	7.98164	0	0	1.88894
MSTRG.14997	52.287	-4.13617	0.978109	-4.22874	2.34999e-05	0.000461813	Down	163.29	31.3908	105.813	26.793	167.824	0	0	0	12.6464	15.1115
MSTRG.21864	43.74	-2.01318	0.476251	-4.22713	2.36692e-05	0.000464681	Down	71.3222	62.7816	54.1563	105.548	57.1317	26.7092	7.98164	5.4792	27.4006	18.8894
MSTRG.18728	27.3863	2.68649	0.635919	4.22458	2.39386e-05	0.000469044	Up	8.44605	0	11.6644	3.24764	13.3902	48.9669	59.8623	28.7658	57.9629	41.5568
MSTRG.11144	45.139	2.14701	0.508341	4.22357	2.40461e-05	0.000470454	Up	12.1999	22.5621	23.3289	5.68337	19.639	54.5313	49.8853	43.8336	69.5555	150.171
HHLG20g0031	16.6798	2.44005	0.578378	4.21877	2.45638e-05	0.000479169	Up	4.69225	5.88578	5.83222	3.24764	6.24878	38.9509	15.9633	43.8336	14.7542	27.3897
MSTRG.11097	645.931	2.46946	0.585656	4.21657	2.48041e-05	0.000483383	Up	50.6763	47.0862	583.222	203.789	102.659	1496.83	1391.8	1062.96	1116.05	404.234
MSTRG.31321	265.46	2.04469	0.485367	4.21266	2.52376e-05	0.00049015	Up	48.7994	283.498	59.1553	52.7741	74.0927	323.849	294.323	602.712	593.329	322.065
MSTRG.25790	21.7568	-2.13964	0.508863	-4.20475	2.61375e-05	0.000506144	Down	29.092	36.2956	21.6625	40.5955	49.9903	3.33865	7.98164	6.849	9.48483	12.2781
MSTRG.4979	121.302	-10.2454	2.44274	-4.19422	2.73809e-05	0.000526123	Down	432.626	391.404	384.926	4.05955	0	0	0	0	0	0
HHLG15g0347	18.3519	-2.777	0.662211	-4.19352	2.74661e-05	0.000526997	Down	31.9073	19.6193	24.9952	28.4168	55.3464	0	7.98164	5.4792	3.16161	6.6113
MSTRG.28620	13.0439	4.33437	1.03395	4.19204	2.76451e-05	0.000529751	Up	0	0	0	1.62382	4.46342	8.90307	29.9312	52.0524	22.1313	11.3337
MSTRG.2723	19.2429	-4.89351	1.16843	-4.1881	2.81303e-05	0.00053832	Down	78.8298	11.7716	22.4957	71.448	1.78537	0	3.99082	0	2.10774	0
MSTRG.19954	5.21233	5.99763	1.4323	4.1874	2.82166e-05	0.000538837	Up	0	0	0	0	0	5.56442	25.9403	6.849	5.26935	8.50025
MSTRG.30926	40.0514	2.08026	0.496857	4.18684	2.82867e-05	0.000539877	Up	20.6459	11.7716	4.99904	20.2977	18.7463	36.7251	38.9105	113.693	69.5555	65.1686
MSTRG.411	26.0301	-2.70332	0.646495	-4.1815	2.89598e-05	0.000550874	Down	36.5996	49.0481	28.3279	64.1409	48.2049	6.6773	11.9725	0	2.10774	13.2226
MSTRG.29427	7.47513	-6.22605	1.49355	-4.16862	3.06445e-05	0.000578218	Down	11.2614	17.6573	1.66635	40.5955	3.57073	0	0	0	0	0
MSTRG.26909	37.9508	-2.83458	0.680152	-4.16756	3.07873e-05	0.000580362	Down	115.429	25.505	65.8207	81.191	45.5268	10.0159	13.9679	0	3.16161	18.8894
MSTRG.19196	39.3069	-2.10617	0.505392	-4.1674	3.08091e-05	0.000580499	Down	93.845	63.7626	77.4852	55.2098	28.5659	13.3546	11.9725	13.698	29.5084	5.66683
MSTRG.29504	207.966	2.46325	0.591153	4.16685	3.08836e-05	0.000581626	Up	95.7219	30.4098	3.3327	130.717	58.9171	387.283	459.942	402.721	315.107	195.506
MSTRG.14704	64.211	-2.32072	0.557924	-4.15955	3.1887e-05	0.000596008	Down	139.829	76.5151	84.9837	162.382	71.4147	17.8061	49.8853	16.4376	20.0235	2.83342
MSTRG.2410	188.745	2.56748	0.617768	4.15606	3.23787e-05	0.000603497	Up	52.5532	15.6954	83.3174	6.49528	114.263	185.851	121.72	554.769	455.272	297.509
MSTRG.19300	4.31886	5.72229	1.37828	4.15177	3.29911e-05	0.000613188	Up	0	0	0	0	0	8.90307	5.98623	9.58859	7.37709	11.3337
MSTRG.25549	2167.96	-4.3527	1.04873	-4.15044	3.31833e-05	0.000615897	Down	163.29	257.012	11411.1	2646.82	6189.87	431.799	116.732	97.2557	47.4242	318.287
MSTRG.8135	56.843	2.121	0.511678	4.14519	3.39536e-05	0.000627849	Up	20.6459	3.92385	19.9962	20.2977	41.0634	115.74	64.8508	150.678	63.2322	68.002
MSTRG.24673	53.1742	4.58056	1.10542	4.14373	3.41699e-05	0.000631262	Up	1.8769	2.94289	1.66635	3.24764	11.6049	271.544	225.481	8.21879	4.21548	0.944472
MSTRG.24695	7.17366	6.45893	1.56147	4.13643	3.52744e-05	0.000648891	Up	0	0	0	0	0	14.4675	17.9587	0	14.7542	24.5563
MSTRG.20007	13.7848	4.70008	1.13781	4.13082	3.61467e-05	0.00066194	Up	0	0	3.3327	1.62382	0	11.1288	73.8302	17.8074	26.3468	3.77789
HHUNg1566	9.09233	-6.50723	1.57567	-4.12982	3.63053e-05	0.000664535	Down	15.9537	15.6954	19.9962	0	39.2781	0	0	0	0	0
HHLG19g0609	41.7771	2.0483	0.496738	4.1235	3.7316e-05	0.000681783	Up	37.538	13.7335	16.6635	6.49528	7.14147	60.0957	66.8463	75.339	52.6935	81.2246
MSTRG.28817	27.1678	5.03625	1.22186	4.12179	3.75943e-05	0.000685295	Up	0	0	0	0	8.03415	81.2405	71.8348	90.4067	3.16161	17.0005
HHLG44g0592	21.9933	2.75662	0.669653	4.1165	3.84671e-05	0.000699602	Up	8.44605	7.8477	3.3327	0	8.92683	35.6123	19.9541	46.5732	59.0167	30.2231
MSTRG.30990	186.632	2.61939	0.636653	4.1143	3.88349e-05	0.000705968	Up	85.399	0	62.488	56.0218	57.1317	373.929	172.603	389.023	419.44	250.285
MSTRG.7515	13.6603	6.21415	1.51141	4.11151	3.93088e-05	0.00071393	Up	0	0	1.66635	0	0	1.11288	104.759	9.58859	14.7542	4.72236
MSTRG.15589	428.258	-3.27048	0.795656	-4.11041	3.94953e-05	0.000716662	Down	1529.67	566.997	276.614	1322.6	184.785	56.757	30.9289	20.547	236.067	57.6128
MSTRG.435	76.8089	-2.86296	0.697911	-4.10219	4.09258e-05	0.000736905	Down	82.5836	21.5812	257.451	38.9717	274.946	22.2577	7.98164	12.3282	8.43096	41.5568
MSTRG.4161	12.1923	3.31965	0.810102	4.09782	4.17067e-05	0.000748595	Up	0.93845	0	2.49952	6.49528	0.892683	23.3705	11.9725	27.396	20.0235	28.3342
MSTRG.8703	323.234	2.09819	0.512175	4.09663	4.19204e-05	0.00075175	Up	198.951	15.6954	108.313	82.0029	207.103	479.653	420.034	352.038	400.471	968.084
MSTRG.28985	173.902	2.08933	0.510217	4.09498	4.222e-05	0.000755579	Up	72.2607	57.8768	86.6501	30.8526	83.0195	123.53	89.7935	693.118	194.966	306.953
MSTRG.30678	59.5867	2.56236	0.62574	4.09493	4.22288e-05	0.000755579	Up	23.4613	10.7906	25.8284	25.9811	0	123.53	85.8027	150.678	60.0706	89.7248
MSTRG.4181	28.7734	-2.31014	0.564479	-4.09251	4.26727e-05	0.000762492	Down	60.9993	49.0481	44.9914	23.5454	60.7025	22.2577	9.97705	8.21879	4.21548	3.77789
MSTRG.5870	60.9489	-2.23984	0.548607	-4.08277	4.45026e-05	0.000792324	Down	155.783	53.953	96.6482	133.153	63.3805	17.8061	5.98623	17.8074	52.6935	12.2781
HHLG32g0304	28.0184	-2.03452	0.498956	-4.07755	4.55127e-05	0.000807073	Down	26.2766	43.1624	25.8284	85.2505	44.6342	8.90307	12.9702	10.9584	13.7003	8.50025
MSTRG.1524	395.798	3.94964	0.968836	4.07669	4.56819e-05	0.000809353	Up	88.2143	0	48.3241	12.9906	91.0537	919.242	501.846	1141.04	911.598	243.674
MSTRG.3170	755.413	-4.0156	0.985702	-4.07385	4.62423e-05	0.000818188	Down	414.795	61.8007	4202.53	98.241	2337.04	75.6761	108.75	52.0524	92.7406	110.503
MSTRG.30219	34.755	2.94331	0.72294	4.07131	4.67501e-05	0.000826806	Up	6.56915	0	17.4967	3.24764	12.4976	33.3865	21.9495	83.5577	98.01	70.8354
HHLG10g0284	11.8141	-4.73185	1.16316	-4.06808	4.74026e-05	0.000836114	Down	21.5844	34.3337	4.99904	32.4764	20.5317	0	0	0	4.21548	0
MSTRG.6253	22.8085	2.56104	0.630196	4.06388	4.82634e-05	0.000849791	Up	0	7.8477	14.164	7.30719	3.57073	47.854	37.9128	32.8752	36.8855	39.6678
MSTRG.1724	9.15288	-6.51691	1.60459	-4.06143	4.87737e-05	0.000857636	Down	38.4765	6.86674	0	20.2977	25.8878	0	0	0	0	0
MSTRG.7850	119.059	-2.90492	0.716162	-4.05624	4.9869e-05	0.000873806	Down	291.858	184.421	186.631	293.911	93.7317	44.5153	47.8899	5.4792	42.1548	0
HHLG3g0271	10.6541	-6.73726	1.66183	-4.05413	5.03216e-05	0.000879026	Down	6.56915	0	55.8226	4.87146	39.2781	0	0	0	0	0
HHLG3g0458	4.77978	5.86237	1.44822	4.048	5.16577e-05	0.000899599	Up	0	0	0	0	0	4.45153	11.9725	20.547	4.21548	6.6113
MSTRG.5118	37.2677	4.34781	1.07525	4.04351	5.26559e-05	0.000916181	Up	4.69225	8.82867	0	4.05955	0	112.401	42.9013	0	95.9022	103.892
HHLG12g0002	10.153	-3.88771	0.961619	-4.04289	5.27973e-05	0.000917838	Down	19.7075	21.5812	9.99809	16.2382	27.6732	3.33865	2.99312	0	0	0
MSTRG.31128	28.6275	4.458	1.10355	4.03971	5.35182e-05	0.000929557	Up	0	5.88578	3.3327	3.24764	0	120.191	37.9128	63.0108	52.6935	0
MSTRG.1991	26.83	2.04941	0.507951	4.03466	5.46823e-05	0.000946058	Up	12.1999	6.86674	9.16491	13.8025	9.81952	47.854	31.9266	84.9275	25.2929	26.4452
MSTRG.17064	48.2531	2.51622	0.623726	4.03417	5.47948e-05	0.000947394	Up	18.769	19.6193	24.9952	4.05955	4.46342	37.838	174.598	84.9275	81.148	32.112
HHLG28g0571	21.5183	4.58793	1.1387	4.02909	5.5993e-05	0.000966213	Up	0	8.82867	0	0	0	21.1448	12.9702	53.4222	80.0942	38.7233
MSTRG.61	511.071	2.20847	0.548218	4.02845	5.61453e-05	0.000968422	Up	113.552	356.09	54.1563	336.131	49.0976	1087.29	360.172	1360.21	936.891	457.124
MSTRG.5662	14.9281	-3.49128	0.867189	-4.02598	5.67386e-05	0.000977806	Down	16.8921	60.8197	27.4947	13.8025	17.8537	0	0	5.4792	3.16161	3.77789
MSTRG.6152	24.1868	2.02676	0.503603	4.02452	5.70907e-05	0.000982172	Up	13.1383	7.8477	8.33174	4.05955	14.2829	37.838	28.9335	61.641	24.239	41.5568
MSTRG.20030	4033.03	3.91187	0.972878	4.02093	5.79683e-05	0.000995549	Up	35.6611	115.754	1994.62	221.651	144.615	6383.5	16152.8	5569.6	6560.34	3151.7
MSTRG.1536	102.859	-2.40645	0.598579	-4.02027	5.81303e-05	0.000996954	Down	182.059	187.364	87.4833	261.435	147.293	13.3546	52.8784	15.0678	76.9325	4.72236
MSTRG.31600	34.0533	4.01327	0.998314	4.02004	5.81872e-05	0.000996954	Up	1.8769	3.92385	0	1.62382	12.4976	10.0159	205.527	73.9692	8.43096	22.6673
MSTRG.18700	85.3871	2.18975	0.545095	4.0172	5.88948e-05	0.00100625	Up	60.0608	9.80963	13.3308	9.74291	60.7025	137.998	125.711	171.225	99.0638	166.227
HHLG14g0925	60.1046	2.11849	0.527394	4.0169	5.89699e-05	0.0010071	Up	31.9073	4.90481	20.8293	44.655	9.81952	114.627	53.8761	132.871	105.387	82.1691
MSTRG.29406	62.432	2.33054	0.580252	4.01644	5.90848e-05	0.00100776	Up	7.5076	43.1624	22.4957	17.862	12.4976	91.2564	47.8899	190.402	159.134	32.112
MSTRG.3332	1170.77	3.31325	0.824988	4.01612	5.91645e-05	0.00100869	Up	21.5844	51.991	676.537	249.256	70.522	2794.45	2639.93	1834.16	2359.62	1009.64
HHLG50g0248	29.1111	2.79412	0.695878	4.01525	5.93823e-05	0.00101153	Up	7.5076	3.92385	4.99904	3.24764	16.961	32.2736	7.98164	101.365	59.0167	53.8349
MSTRG.4033	1949.62	-2.00844	0.500269	-4.01472	5.95175e-05	0.00101254	Down	1095.17	2600.53	1579.7	8844.94	1495.24	520.829	1162.33	457.513	848.366	891.581
MSTRG.16611	94.4462	2.33675	0.582173	4.01384	5.97396e-05	0.00101545	Up	18.769	34.3337	17.4967	40.5955	44.6342	113.514	161.628	387.653	102.225	23.6118
MSTRG.31656	9.34411	6.83707	1.70459	4.01098	6.04684e-05	0.00102589	Up	0	0	0	0	0	0	65.8485	16.4376	7.37709	3.77789
MSTRG.29343	36.6986	-4.28604	1.06923	-4.00853	6.10987e-05	0.00103457	Down	109.799	12.7525	34.1601	180.244	12.4976	0	9.97705	0	0	7.55577
HHLG39g0836	28.5895	2.33922	0.583899	4.00621	6.17001e-05	0.00104165	Up	4.69225	15.6954	18.3298	4.05955	4.46342	22.2577	59.8623	45.2034	71.6632	39.6678
HHLG26g0846	51.8461	5.83555	1.45774	4.00315	6.25035e-05	0.00105432	Up	0	0	0	0	8.92683	121.304	206.525	65.7504	98.01	17.945
HHLG28g0501	7.55155	6.53136	1.63322	3.99908	6.35895e-05	0.00106946	Up	0	0	0	0	0	10.0159	22.9472	0	36.8855	5.66683
MSTRG.5577	26.3912	-2.0317	0.508183	-3.99798	6.38864e-05	0.00107354	Down	35.6611	57.8768	40.8255	54.3979	23.2098	6.6773	16.961	13.698	4.21548	10.3892
HHLG30g0351	5.24102	6.00315	1.50376	3.99209	6.54922e-05	0.00109821	Up	0	0	0	0	0	25.5963	1.99541	4.1094	8.43096	12.2781
MSTRG.6147	66.0422	-2.28743	0.573362	-3.9895	6.62129e-05	0.00110749	Down	45.0456	114.773	43.325	268.742	75.8781	23.3705	15.9633	35.6148	8.43096	29.2786
MSTRG.29560	87.2797	2.91573	0.730848	3.98952	6.62074e-05	0.00110749	Up	58.1839	1.96193	3.3327	33.2883	5.3561	183.626	231.468	158.897	129.626	67.0575
MSTRG.5585	106.955	2.03634	0.511042	3.98468	6.75715e-05	0.00112507	Up	26.2766	62.7816	89.9828	16.2382	14.2829	95.708	162.626	267.111	147.542	187.005
MSTRG.21503	1047.31	2.03971	0.512356	3.98103	6.86161e-05	0.00114002	Up	310.627	281.536	293.277	1040.06	123.19	1266.46	1600.32	506.826	2809.62	2241.23
MSTRG.10006	251.037	-2.17535	0.546831	-3.9781	6.9468e-05	0.00115224	Down	894.343	451.243	146.639	277.673	285.659	57.8699	20.9518	104.105	71.6632	200.228
MSTRG.4901	28.9111	-3.95237	0.99377	-3.97715	6.97466e-05	0.00115494	Down	89.1528	41.2004	54.1563	76.3195	10.7122	13.3546	0	0	4.21548	0
MSTRG.28657	22.7232	-5.70627	1.43766	-3.96913	7.21359e-05	0.00119005	Down	87.2759	61.8007	65.8207	8.1191	0	0	0	0	4.21548	0
MSTRG.14079	155.045	-2.58232	0.651407	-3.96422	7.36377e-05	0.00120865	Down	114.491	334.508	299.109	233.83	347.254	3.33865	100.768	8.21879	75.8787	33.0565
MSTRG.28002	10.1562	-4.54199	1.14632	-3.96225	7.42482e-05	0.00121732	Down	8.44605	23.5431	28.3279	11.3667	25.8878	0	3.99082	0	0	0
MSTRG.23439	63.2679	-2.25621	0.569937	-3.9587	7.53595e-05	0.00123249	Down	64.7531	37.2766	151.638	102.301	167.824	11.1288	11.9725	8.21879	28.4545	49.1125
MSTRG.1050	42.3607	-3.84659	0.972324	-3.95608	7.61901e-05	0.00124301	Down	136.075	82.4009	53.3231	70.6361	53.561	0	0	5.4792	22.1313	0
HHLG10g0720	4.26487	5.70276	1.44224	3.9541	7.6824e-05	0.0012513	Up	0	0	0	0	0	13.3546	2.99312	9.58859	6.32322	10.3892
MSTRG.20903	18.5112	-3.51729	0.892048	-3.94294	8.04903e-05	0.00130401	Down	63.8146	21.5812	44.1582	11.3667	29.4585	0	5.98623	1.3698	7.37709	0
MSTRG.30752	18.6478	-4.38368	1.11183	-3.94276	8.05509e-05	0.00130401	Down	9.3845	45.1243	31.6606	27.6049	64.2732	0	0	0	8.43096	0
MSTRG.15182	8.47783	6.69636	1.70136	3.93589	8.289e-05	0.00133751	Up	0	0	0	0	0	13.3546	7.98164	5.4792	57.9629	0
MSTRG.24239	45.1553	-3.60702	0.917366	-3.93193	8.42673e-05	0.00135753	Down	43.1687	26.486	128.309	77.9433	141.937	0	1.99541	0	5.26935	26.4452
MSTRG.7044	12.0785	-2.94917	0.750254	-3.93089	8.46317e-05	0.00136064	Down	32.8458	18.6383	26.6616	13.8025	15.1756	5.56442	3.99082	0	3.16161	0.944472
HHLG10g0303	9.29141	4.70089	1.19882	3.92126	8.80879e-05	0.00141107	Up	0	0	3.3327	0	0	28.935	13.9679	5.4792	14.7542	26.4452
HHLG29g0681	30.4887	-2.59298	0.661732	-3.91847	8.91117e-05	0.00142346	Down	78.8298	34.3337	64.1544	36.5359	48.2049	4.45153	19.9541	0	13.7003	4.72236
HHLG25g0240	21.8166	2.49671	0.637909	3.91389	9.08196e-05	0.00144784	Up	3.7538	8.82867	12.4976	3.24764	4.46342	66.773	9.97705	38.3544	40.0471	30.2231
HHLG31g0732	9.8369	-4.53136	1.15866	-3.91085	9.19735e-05	0.00146213	Down	23.4613	16.6764	5.83222	22.7335	25.8878	0	0	0	0	3.77789
MSTRG.22777	6.03835	-5.91729	1.51364	-3.9093	9.25635e-05	0.00146799	Down	10.323	1.96193	8.33174	4.05955	35.7073	0	0	0	0	0
MSTRG.30800	4.94594	5.91656	1.51517	3.90489	9.42669e-05	0.00149322	Up	0	0	0	0	0	11.1288	20.9518	12.3282	3.16161	1.88894
MSTRG.25470	232.601	3.88164	0.995617	3.89873	9.66997e-05	0.00152585	Up	45.0456	0	14.164	52.7741	35.7073	784.583	474.908	575.316	306.676	36.8344
MSTRG.31074	22.4942	-2.85321	0.731836	-3.8987	9.67105e-05	0.00152585	Down	7.5076	58.8578	46.6577	66.5766	17.8537	2.22577	5.98623	6.849	10.5387	1.88894
MSTRG.18731	88.6356	-2.08806	0.535758	-3.89739	9.7235e-05	0.00153351	Down	210.213	93.1915	72.4861	270.366	71.4147	46.7411	14.9656	17.8074	67.4477	21.7229
HHLG48g0019	24.4216	3.19649	0.821017	3.89334	9.88745e-05	0.0015569	Up	5.6307	0	10.8313	7.30719	0	51.1926	27.9357	84.9275	33.7239	22.6673
HHLG31g0576	73.942	-2.37939	0.611799	-3.88917	0.000100589	0.00158139	Down	194.259	80.439	119.977	140.46	85.6976	17.8061	44.8967	0	37.9393	17.945
HHLG28g0514	32.6931	2.68476	0.69066	3.88724	0.000101391	0.00159338	Up	7.5076	7.8477	0	17.0501	11.6049	50.0797	42.9013	20.547	103.279	66.113
HHLG5g0956	9.22983	-6.52786	1.67983	-3.88603	0.000101895	0.00159877	Down	3.7538	55.9149	0	12.9906	19.639	0	0	0	0	0
HHLG10g0410	24.1734	3.71859	0.959744	3.87457	0.000106815	0.0016609	Up	0	0	0	9.74291	7.14147	25.5963	27.9357	64.3806	74.8248	32.112
MSTRG.30586	69.969	2.16503	0.559427	3.87009	0.000108797	0.0016871	Up	11.2614	16.6764	44.1582	28.4168	26.7805	74.5632	19.9541	145.199	202.343	130.337
MSTRG.14030	112.141	2.35713	0.609526	3.86715	0.000110115	0.00170488	Up	72.2607	3.92385	64.1544	9.74291	33.0293	194.755	98.7728	191.772	142.273	310.731
MSTRG.15171	44.5391	2.02786	0.524452	3.86662	0.000110354	0.00170658	Up	9.3845	26.486	24.162	9.74291	17.8537	28.935	82.8095	128.761	83.2558	34.001
MSTRG.15047	253.173	-2.14276	0.554283	-3.86583	0.000110712	0.00171145	Down	613.746	387.48	400.757	335.319	327.615	43.4024	121.72	10.9584	235.013	55.7238
MSTRG.21734	7.49394	-6.22755	1.61713	-3.85098	0.000117647	0.00180672	Down	28.1535	24.5241	13.3308	8.931	0	0	0	0	0	0
MSTRG.14996	26.8187	-4.22085	1.09764	-3.84537	0.00012037	0.00184213	Down	85.399	44.1433	44.9914	17.0501	63.3805	0	0	0	0	13.2226
MSTRG.22297	150.978	-2.27379	0.592609	-3.83691	0.000124592	0.00189508	Down	452.333	269.765	186.631	227.335	115.156	17.8061	44.8967	32.8752	150.703	12.2781
MSTRG.30560	7.00967	6.41891	1.67307	3.83661	0.000124743	0.00189665	Up	0	0	0	0	0	13.3546	26.938	26.0262	0	3.77789
MSTRG.31444	12.6436	-3.53536	0.921552	-3.83632	0.000124894	0.00189823	Down	10.323	44.1433	20.8293	10.5548	30.3512	2.22577	0	2.7396	5.26935	0
HHLG38g0623	19.6345	-4.40108	1.14926	-3.8295	0.000128402	0.00194543	Down	93.845	29.4289	17.4967	11.3667	35.7073	0	0	0	0	8.50025
MSTRG.12275	40.837	2.12216	0.554317	3.82842	0.000128967	0.00195223	Up	32.8458	3.92385	6.66539	9.74291	23.2098	89.0307	72.8325	54.792	73.7709	41.5568
MSTRG.14135	93.6421	4.31874	1.12868	3.82638	0.000130044	0.00196523	Up	0	18.6383	0	16.2382	9.81952	116.853	43.899	399.981	249.767	81.2246
MSTRG.70	7.7641	-6.27968	1.64245	-3.82337	0.000131639	0.00198406	Down	41.2918	0	18.3298	7.30719	10.7122	0	0	0	0	0
MSTRG.10840	20.3185	-2.61795	0.685238	-3.82049	0.000133187	0.00200057	Down	30.0304	21.5812	43.325	56.8337	23.2098	10.0159	9.97705	0	6.32322	1.88894
HHLG4g0917	8.95731	-6.48581	1.69963	-3.81601	0.000135628	0.00203187	Down	49.7379	7.8477	0	28.4168	3.57073	0	0	0	0	0
MSTRG.3801	49.7367	2.70543	0.710762	3.80638	0.000141013	0.00210225	Up	15.0152	7.8477	19.9962	0	23.2098	65.6601	54.8738	180.813	32.67	97.2806
HHLG50g0540	26.7281	2.70971	0.712601	3.80256	0.000143208	0.00213018	Up	18.769	3.92385	3.3327	3.24764	6.24878	24.4834	78.8187	89.0369	15.8081	23.6118
MSTRG.15723	10.3839	-3.09731	0.816098	-3.79526	0.000147486	0.00217996	Down	18.769	5.88578	33.327	8.1191	26.7805	2.22577	1.99541	2.7396	2.10774	1.88894
HHLG31g0659	7.73166	-6.27342	1.65424	-3.79233	0.000149238	0.00220094	Down	15.0152	7.8477	12.4976	0	41.9561	0	0	0	0	0
HHLG48g0550	6.50108	6.3116	1.66457	3.79172	0.000149607	0.00220475	Up	0	0	0	0	0	6.6773	0	16.4376	30.5622	11.3337
MSTRG.7018	24.7918	-2.0488	0.541123	-3.7862	0.000152969	0.00224576	Down	29.092	58.8578	36.6596	48.7146	26.7805	4.45153	20.9518	5.4792	8.43096	8.50025
HHLG14g0547	20.0084	2.59392	0.687679	3.77199	0.00016195	0.00235266	Up	3.7538	3.92385	7.49856	12.9906	0	32.2736	19.9541	45.2034	44.2626	30.2231
MSTRG.26351	26.1467	-2.15293	0.571805	-3.76515	0.000166451	0.00241099	Down	67.5684	22.5621	56.6558	39.7836	26.7805	17.8061	7.98164	6.849	12.6464	2.83342
MSTRG.21964	7.10677	-6.15172	1.63697	-3.75799	0.000171285	0.00247022	Down	27.2151	7.8477	20.8293	0	15.1756	0	0	0	0	0
HHLG34g0298	28.8813	-2.88429	0.768302	-3.75411	0.000173956	0.00250149	Down	36.5996	34.3337	53.3231	77.9433	52.6683	0	17.9587	0	8.43096	7.55577
MSTRG.493	92.0973	-4.82222	1.28538	-3.7516	0.000175712	0.00252217	Down	234.613	307.041	31.6606	293.911	22.3171	4.45153	0	2.7396	24.239	0
HHLG37g0653	6.58627	-6.04419	1.61282	-3.7476	0.000178536	0.0025581	Down	12.1999	0	19.163	21.1096	13.3902	0	0	0	0	0
MSTRG.25687	24.5743	2.9079	0.776096	3.74683	0.000179087	0.00256414	Up	15.0152	3.92385	3.3327	3.24764	3.57073	21.1448	19.9541	12.3282	34.7777	128.448
HHLG48g0116	6.84729	-6.09847	1.6278	-3.74646	0.000179347	0.00256595	Down	19.7075	8.82867	0	20.2977	19.639	0	0	0	0	0
HHLG11g0279	21.5328	-2.59879	0.693737	-3.74608	0.000179618	0.00256804	Down	51.6148	29.4289	51.6568	19.4858	32.1366	0	4.98853	13.698	9.48483	2.83342
MSTRG.18526	6.92385	6.40161	1.71162	3.74009	0.000183956	0.00262252	Up	0	0	0	0	0	42.2896	7.98164	13.698	5.26935	0
MSTRG.30093	19.0152	-3.2543	0.871169	-3.73555	0.000187307	0.00266456	Down	70.3838	11.7716	26.6616	22.7335	41.0634	0	5.98623	0	2.10774	9.44472
MSTRG.29635	59.5371	-5.98282	1.60307	-3.73211	0.000189883	0.00269542	Down	205.521	163.821	3.3327	213.532	0	3.33865	2.99312	0	0	2.83342
MSTRG.30061	7.13964	-6.1596	1.65092	-3.73102	0.00019071	0.00270427	Down	15.0152	10.7906	36.6596	8.931	0	0	0	0	0	0
HHLG43g0394	9.74453	-4.25821	1.14149	-3.7304	0.000191178	0.00270897	Down	22.5228	15.6954	9.99809	17.862	25.8878	0	0	5.4792	0	0
MSTRG.23380	14.389	-4.1925	1.12406	-3.72979	0.000191643	0.00271459	Down	21.5844	14.7144	52.49	13.8025	33.922	0	0	0	7.37709	0
HHLG13g0935	4.45195	-5.47891	1.47144	-3.7235	0.000196482	0.0027713	Down	12.1999	3.92385	18.3298	6.49528	3.57073	0	0	0	0	0
HHLG27g0368	39.6606	2.02995	0.545333	3.72241	0.000197333	0.00278134	Up	25.3382	3.92385	9.99809	25.9811	12.4976	96.8208	58.8646	90.4067	36.8855	35.8899
MSTRG.7126	268.105	-2.08868	0.561282	-3.72127	0.00019822	0.00278989	Down	478.61	227.583	183.298	930.448	350.825	131.32	51.8807	49.3128	246.606	31.1676
MSTRG.757	103.501	2.05111	0.551402	3.7198	0.00019938	0.00280238	Up	20.6459	27.467	35.8265	98.241	18.7463	215.899	344.208	93.1463	76.9325	103.892
MSTRG.13781	218.437	3.39781	0.913784	3.7184	0.000200491	0.00281289	Up	5.6307	103.001	15.8303	56.8337	8.03415	275.995	94.782	1031.46	470.026	122.781
HHLG9g0283	43.3222	2.29975	0.618923	3.71572	0.000202623	0.0028398	Up	7.5076	19.6193	6.66539	6.49528	33.0293	81.2405	56.8692	32.8752	154.919	34.001
MSTRG.13677	25.319	-3.20705	0.863446	-3.71425	0.00020381	0.00285441	Down	78.8298	16.6764	81.651	25.9811	24.9951	0	0	10.9584	8.43096	5.66683
MSTRG.15040	234.737	2.38489	0.642173	3.71378	0.000204184	0.00285764	Up	64.7531	78.477	45.8246	47.0908	141.044	481.878	69.8394	780.786	37.9393	599.74
HHLG14g0847	6.84283	-6.09817	1.64231	-3.71317	0.000204676	0.00286265	Down	14.0768	0	8.33174	12.9906	33.0293	0	0	0	0	0
MSTRG.3904	6.75299	6.37035	1.71565	3.71307	0.000204757	0.00286265	Up	0	0	0	0	0	28.935	2.99312	0	6.32322	29.2786
MSTRG.24432	109.926	-2.08045	0.560418	-3.71232	0.000205366	0.00286991	Down	162.352	259.955	58.3222	348.309	59.8098	62.3215	54.8738	49.3128	32.67	11.3337
MSTRG.24714	3155.69	2.60193	0.701514	3.70902	0.000208063	0.00290071	Up	245.874	502.253	2232.07	1205.69	276.732	7636.6	9319.56	3740.92	4015.25	2381.96
MSTRG.21094	48.4963	-2.66707	0.719489	-3.70689	0.000209818	0.00292273	Down	51.6148	8.82867	232.456	32.4764	93.7317	22.2577	8.97935	5.4792	16.8619	12.2781
MSTRG.6471	17.239	4.51328	1.21976	3.70013	0.000215487	0.00298537	Up	0	3.92385	3.3327	0	0	26.7092	7.98164	109.584	18.9697	1.88894
MSTRG.29958	39.7214	-2.44884	0.661883	-3.69982	0.000215756	0.00298702	Down	53.4917	142.24	49.9904	37.3478	52.6683	0	22.9472	16.4376	12.6464	9.44472
MSTRG.19275	33.1688	2.698	0.72988	3.6965	0.000218593	0.00302104	Up	4.69225	23.5431	9.99809	0	6.24878	66.773	22.9472	94.5161	54.8013	48.1681
MSTRG.17043	27.845	-2.40726	0.652591	-3.68877	0.000225342	0.00309601	Down	60.0608	60.8197	69.1534	21.9216	22.3171	0	9.97705	12.3282	10.5387	11.3337
MSTRG.31072	4.34093	-5.44102	1.47571	-3.68705	0.000226867	0.00311375	Down	9.3845	11.7716	6.66539	13.8025	1.78537	0	0	0	0	0
HHLG8g0445	13.3692	-3.4459	0.93486	-3.68601	0.000227799	0.00312513	Down	17.8306	21.5812	28.3279	18.6739	35.7073	0	0	6.849	0	4.72236
HHLG50g0246	18.0686	2.081	0.565087	3.68262	0.00023085	0.0031586	Up	5.6307	3.92385	4.16587	6.49528	14.2829	22.2577	39.9082	30.1356	36.8855	17.0005
MSTRG.5028	45.952	-2.31772	0.629428	-3.68227	0.000231164	0.00316181	Down	98.5373	74.5532	55.8226	71.448	83.0195	5.56442	15.9633	0	34.7777	19.8339
MSTRG.23471	38.474	2.24594	0.610561	3.67848	0.000234624	0.00319663	Up	11.2614	27.467	13.3308	10.5548	4.46342	83.4662	25.9403	80.8181	108.549	18.8894
HHLG38g0746	13.6629	3.56995	0.970822	3.67725	0.000235761	0.00320924	Up	0	3.92385	6.66539	0	0	33.3865	23.9449	31.5054	12.6464	24.5563
MSTRG.21905	164.075	-2.05662	0.559908	-3.67315	0.000239583	0.00325014	Down	325.642	191.288	203.294	426.252	176.751	23.3705	79.8164	16.4376	168.619	29.2786
HHLG15g0262	9.56475	4.31559	1.17497	3.67293	0.000239783	0.00325175	Up	4.69225	0	0	0	0	21.1448	27.9357	6.849	18.9697	16.056
MSTRG.22384	225.377	-3.55384	0.967824	-3.672	0.000240664	0.00326258	Down	542.424	65.7245	597.386	151.827	719.503	51.1926	21.9495	45.2034	0	58.5573
MSTRG.23574	83.0066	2.16759	0.590397	3.6714	0.000241221	0.00326791	Up	15.9537	3.92385	48.3241	32.4764	49.9903	159.142	75.8256	283.548	75.8787	85.0025
MSTRG.30737	22.1046	-3.05645	0.83429	-3.66353	0.000248762	0.00335521	Down	41.2918	57.8768	26.6616	42.2193	28.5659	0	0	16.4376	4.21548	3.77789
HHLG43g0275	28.8169	2.05757	0.562055	3.6608	0.000251433	0.00337892	Up	15.0152	3.92385	14.9971	14.6144	7.14147	26.7092	34.9197	52.0524	25.2929	93.5027
MSTRG.8532	6.80445	6.37457	1.74328	3.65665	0.000255531	0.00342444	Up	0	0	0	0	0	0	3.99082	32.8752	27.4006	3.77789
HHLG27g0132	7.26518	-6.18623	1.69315	-3.65367	0.000258516	0.0034505	Down	3.7538	0	27.4947	32.4764	8.92683	0	0	0	0	0
MSTRG.4647	79.4838	-2.00331	0.548411	-3.65294	0.000259258	0.00345691	Down	88.2143	184.421	108.313	102.301	153.542	38.9509	6.98394	13.698	20.0235	78.3912
HHLG19g0322	5.90997	6.17703	1.69176	3.65124	0.000260977	0.00347634	Up	0	0	0	0	0	27.8221	16.961	0	10.5387	3.77789
MSTRG.16682	125.561	-2.38957	0.654601	-3.65043	0.000261805	0.0034862	Down	198.951	243.279	137.474	341.002	133.902	45.6282	28.9335	6.849	114.872	4.72236
MSTRG.16821	7.47517	-4.44171	1.21731	-3.64878	0.000263493	0.00350633	Down	14.0768	7.8477	24.162	14.6144	10.7122	3.33865	0	0	0	0
HHUNg1330	6.03316	6.20336	1.70097	3.64695	0.000265369	0.00352658	Up	0	0	0	0	0	33.3865	0	10.9584	8.43096	7.55577
MSTRG.28155	29.3551	-2.87027	0.787078	-3.64674	0.000265592	0.00352837	Down	27.2151	75.5341	32.4938	79.5671	43.7415	11.1288	0	0	11.5926	12.2781
MSTRG.14193	3237.93	2.87373	0.788482	3.64464	0.000267767	0.0035537	Up	2560.09	84.3628	322.438	159.946	760.566	5098.12	6731.52	6612.02	3913.02	6137.18
HHLG18g0120	26.8323	2.38587	0.654684	3.64432	0.000268103	0.00355579	Up	4.69225	7.8477	14.164	5.68337	10.7122	90.1435	15.9633	10.9584	41.1009	67.0575
MSTRG.30578	6.46935	-6.01842	1.65477	-3.63702	0.000275813	0.00364225	Down	0	8.82867	25.8284	21.1096	8.92683	0	0	0	0	0
HHLG2g0165	11.5785	-3.88058	1.06783	-3.63408	0.000278974	0.00367545	Down	34.7227	9.80963	40.8255	17.862	5.3561	0	2.99312	0	4.21548	0
HHLG30g0386	17.1929	-2.21245	0.609101	-3.63233	0.000280876	0.00369562	Down	30.9689	21.5812	34.9933	29.2287	24.9951	11.1288	3.99082	0	8.43096	6.6113
HHLG35g0644	35.2003	2.39309	0.658981	3.63151	0.000281771	0.00370617	Up	19.7075	0	4.99904	15.4263	16.0683	40.0638	59.8623	80.8181	34.7777	80.2801
MSTRG.15209	55.2928	-2.38796	0.658075	-3.62871	0.000284845	0.00373918	Down	88.2143	100.058	43.325	142.896	90.161	0	12.9702	10.9584	28.4545	35.8899
MSTRG.30580	29.7222	-2.02151	0.557278	-3.62747	0.000286208	0.00375583	Down	47.861	11.7716	59.9885	56.8337	61.5951	17.8061	5.98623	15.0678	13.7003	6.6113
HHLG4g0749	40.1522	2.03613	0.561414	3.62679	0.000286966	0.0037633	Up	7.5076	11.7716	3.3327	39.7836	16.0683	80.1276	63.8531	60.2712	52.6935	66.113
MSTRG.19962	158.853	2.43622	0.671763	3.62661	0.000287172	0.00376475	Up	38.4765	95.1534	40.8255	69.8242	3.57073	241.496	682.43	153.418	207.612	55.7238
MSTRG.1723	9.2037	-4.35589	1.20229	-3.623	0.000291203	0.00381092	Down	28.1535	22.5621	9.99809	5.68337	21.4244	0	0	0	4.21548	0
MSTRG.31065	9.84379	-4.84656	1.33777	-3.62286	0.000291364	0.00381092	Down	28.1535	39.2385	19.9962	3.24764	4.46342	3.33865	0	0	0	0
MSTRG.2221	20.6466	-3.52288	0.972839	-3.62123	0.000293202	0.00383118	Down	45.9841	70.6293	21.6625	16.2382	35.7073	0	10.9748	0	5.26935	0
MSTRG.29174	69.5985	-2.42473	0.669836	-3.61989	0.000294725	0.00384553	Down	167.983	144.202	118.311	66.5766	90.161	8.90307	25.9403	0	56.909	17.0005
HHLG26g0635	17.1193	-2.72901	0.754152	-3.61864	0.000296152	0.00386152	Down	36.5996	32.3718	22.4957	29.2287	28.5659	4.45153	8.97935	0	0	8.50025
MSTRG.12684	19.7872	-3.2978	0.911629	-3.61748	0.000297489	0.00387067	Down	19.7075	5.88578	62.488	58.4575	33.0293	0	0	5.4792	5.26935	7.55577
MSTRG.22190	16.5363	-2.34626	0.649398	-3.61298	0.000302704	0.00392439	Down	31.9073	26.486	12.4976	37.3478	30.3512	8.90307	3.99082	0	6.32322	7.55577
HHLG43g0124	9.4192	-4.47535	1.23987	-3.60954	0.000306744	0.0039716	Down	23.4613	23.5431	2.49952	19.4858	21.4244	0	0	0	0	3.77789
MSTRG.27656	14.9119	4.74641	1.31865	3.59945	0.000318888	0.0040955	Up	0	2.94289	0	2.43573	0	20.0319	78.8187	30.1356	14.7542	0
MSTRG.26835	298.434	-2.23159	0.620233	-3.598	0.000320677	0.00411128	Down	733.868	328.623	336.602	793.236	268.698	13.3546	182.58	19.1772	221.313	86.8914
HHLG22g0547	49.5939	2.22705	0.619345	3.59582	0.000323374	0.00413974	Up	22.5228	23.5431	0	23.5454	17.8537	75.6761	95.7797	49.3128	115.926	71.7799
MSTRG.19423	50.0468	-3.10647	0.864596	-3.59298	0.000326922	0.00418113	Down	68.5069	152.049	36.6596	146.144	45.5268	0	31.9266	0	7.37709	12.2781
MSTRG.25801	64.0035	2.25031	0.626858	3.58982	0.000330903	0.00422525	Up	0	23.5431	35.8265	18.6739	33.0293	116.853	130.699	73.9692	142.273	65.1686
MSTRG.13012	42.1226	-2.62495	0.731548	-3.58821	0.000332952	0.00424492	Down	74.1376	20.6002	93.3155	37.3478	137.473	10.0159	4.98853	0	26.3468	17.0005
MSTRG.11410	37.194	2.02791	0.565154	3.58824	0.00033292	0.00424492	Up	7.5076	11.7716	3.3327	31.6645	18.7463	32.2736	79.8164	82.1879	52.6935	51.946
HHLG40g0326	28.878	-2.59198	0.722508	-3.58747	0.000333901	0.00425125	Down	13.1383	44.1433	68.3203	24.3573	98.1952	6.6773	15.9633	0	9.48483	8.50025
MSTRG.14110	30.3123	2.54814	0.710346	3.58718	0.000334278	0.00425469	Up	8.44605	11.7716	10.8313	0	13.3902	66.773	36.9151	30.1356	20.0235	104.836
MSTRG.9141	12.0547	3.72828	1.03955	3.58642	0.000335243	0.00426561	Up	3.7538	4.90481	0	0	0	21.1448	19.9541	35.6148	29.5084	5.66683
MSTRG.240	60.3166	-2.69386	0.751898	-3.58275	0.000339998	0.00431369	Down	86.3374	29.4289	221.624	56.0218	129.439	18.919	3.99082	0	25.2929	32.112
MSTRG.29073	12.1439	-3.97123	1.10866	-3.58202	0.000340946	0.00432158	Down	28.1535	9.80963	18.3298	53.586	4.46342	0	4.98853	0	2.10774	0
HHLG43g0475	6.12388	-5.9394	1.66014	-3.57764	0.000346704	0.00438061	Down	11.2614	0	24.162	18.6739	7.14147	0	0	0	0	0
HHLG8g0435	46.4591	-5.35318	1.49634	-3.57751	0.000346877	0.00438096	Down	91.0297	22.5621	155.804	25.1692	158.898	11.1288	0	0	0	0
MSTRG.7796	17.8232	2.62994	0.736438	3.57116	0.000355407	0.00447635	Up	3.7538	11.7716	4.99904	0	4.46342	36.7251	25.9403	32.8752	46.3703	11.3337
HHUNg0224	11.132	3.55895	0.997267	3.5687	0.000358758	0.00451141	Up	0	0	0	3.24764	5.3561	13.3546	15.9633	27.396	33.7239	12.2781
MSTRG.7265	13.3164	-2.05121	0.574843	-3.56829	0.000359319	0.00451704	Down	14.0768	19.6193	23.3289	34.1002	16.0683	5.56442	3.99082	5.4792	5.26935	5.66683
MSTRG.12240	6.2396	-4.76096	1.33513	-3.56591	0.000362592	0.004551	Down	13.1383	4.90481	14.164	4.87146	23.2098	0	0	0	2.10774	0
MSTRG.2608	13.4881	-4.32746	1.21365	-3.56567	0.000362934	0.00455384	Down	61.9377	11.7716	8.33174	34.9121	11.6049	0	0	0	6.32322	0
MSTRG.15756	20.9937	-2.79674	0.784588	-3.56459	0.000364419	0.00456708	Down	39.4149	12.7525	15.8303	87.6862	27.6732	8.90307	7.98164	5.4792	4.21548	0
MSTRG.30083	19.2301	-4.43219	1.24374	-3.5636	0.000365809	0.00458125	Down	52.5532	37.2766	25.8284	68.2004	0	4.45153	3.99082	0	0	0
HHLG4g0985	6.2604	6.25382	1.75548	3.56246	0.000367395	0.00459678	Up	0	0	0	0	0	4.45153	0	30.1356	24.239	3.77789
HHLG3g0722	31.1111	-2.33386	0.655171	-3.56221	0.000367747	0.00459828	Down	23.4613	47.0862	49.9904	88.4981	50.8829	14.4675	7.98164	0	22.1313	6.6113
MSTRG.31393	7.6519	-5.06518	1.42246	-3.56087	0.000369632	0.0046175	Down	41.2918	9.80963	1.66635	14.6144	7.14147	0	1.99541	0	0	0
MSTRG.30701	9.52608	-5.3918	1.51548	-3.55782	0.000373948	0.00466328	Down	13.1383	18.6383	37.4928	0	24.1024	0	0	0	0	1.88894
HHLG4g0165	6.46215	-4.79999	1.34919	-3.55768	0.000374145	0.00466362	Down	11.2614	2.94289	7.49856	17.862	22.3171	0	0	2.7396	0	0
HHUNg1120	6.41276	-6.00274	1.68864	-3.55477	0.000378307	0.00470518	Down	33.7842	7.8477	9.99809	0	12.4976	0	0	0	0	0
HHLG5g0954	19.268	-3.14286	0.884165	-3.55461	0.000378541	0.00470662	Down	59.1224	19.6193	25.8284	56.8337	11.6049	0	9.97705	5.4792	4.21548	0
HHLG3g0548	15.821	2.33086	0.656312	3.55145	0.000383108	0.00475152	Up	7.5076	6.86674	4.16587	2.43573	5.3561	22.2577	40.9059	39.7242	6.32322	22.6673
MSTRG.12487	39.1964	2.07396	0.584624	3.54751	0.000388894	0.00479977	Up	28.1535	19.6193	20.8293	3.24764	3.57073	75.6761	35.9174	64.3806	62.1784	78.3912
MSTRG.21944	63.0713	-2.71359	0.766577	-3.53988	0.000400311	0.00492039	Down	116.368	94.1724	54.1563	219.216	63.3805	15.5804	7.98164	8.21879	51.6397	0
MSTRG.481	72.804	-2.01681	0.570226	-3.53686	0.000404921	0.00496631	Down	94.7835	76.5151	161.636	66.5766	183.893	55.6442	3.99082	38.3544	12.6464	34.001
MSTRG.21287	11.0934	-4.73294	1.33854	-3.53589	0.000406399	0.004976	Down	23.4613	21.5812	3.3327	55.2098	3.57073	0	0	0	0	3.77789
MSTRG.25430	19.0504	-3.6947	1.04575	-3.53305	0.000410794	0.00501669	Down	15.0152	51.991	66.6539	8.1191	34.8146	0	0	5.4792	8.43096	0
MSTRG.29973	11.3993	-2.63173	0.745931	-3.52812	0.000418525	0.00509701	Down	18.769	17.6573	19.9962	27.6049	14.2829	2.22577	0	2.7396	3.16161	7.55577
HHLG34g0488	16.5264	2.02581	0.574413	3.52674	0.000420709	0.00511891	Up	3.7538	4.90481	7.49856	7.30719	8.92683	34.4994	33.922	32.8752	22.1313	9.44472
MSTRG.16571	462.796	-2.15024	0.609864	-3.52576	0.000422267	0.00513158	Down	1289.43	308.022	369.096	1232.48	578.459	129.094	23.9449	52.0524	394.148	251.23
MSTRG.29019	10.6192	-3.58138	1.01576	-3.5258	0.0004222	0.00513158	Down	28.1535	22.5621	25.8284	14.6144	7.14147	2.22577	0	0	0	5.66683
MSTRG.18298	52.9121	-2.34773	0.666078	-3.5247	0.000423957	0.0051474	Down	33.7842	221.698	34.9933	129.906	22.3171	13.3546	17.9587	5.4792	23.1852	26.4452
HHLG4g0258	10.1402	4.07759	1.15699	3.52432	0.000424579	0.00515181	Up	0	5.88578	0	0	0	17.8061	17.9587	24.6564	10.5387	24.5563
MSTRG.7563	47.8346	2.34711	0.666017	3.5241	0.000424924	0.00515442	Up	15.0152	15.6954	0	30.8526	16.961	74.5632	137.683	93.1463	45.3164	49.1125
HHLG27g0385	10.1806	-3.94496	1.11962	-3.52349	0.00042591	0.00516166	Down	24.3997	19.6193	9.99809	19.4858	22.3171	0	5.98623	0	0	0
MSTRG.10739	8.29209	3.44287	0.978677	3.51788	0.000435001	0.00524945	Up	0	1.96193	3.3327	1.62382	0	10.0159	5.98623	12.3282	31.6161	16.056
MSTRG.30374	22.1161	2.35937	0.670663	3.51796	0.00043487	0.00524945	Up	1.8769	17.6573	4.99904	8.1191	3.57073	66.773	49.8853	26.0262	15.8081	26.4452
MSTRG.29334	16.4216	-2.31701	0.658688	-3.51761	0.000435446	0.00525204	Down	41.2918	19.6193	44.1582	6.49528	24.9951	5.56442	3.99082	8.21879	4.21548	5.66683
HHLG12g0225	5.7786	-5.85294	1.66502	-3.51523	0.000439375	0.00528819	Down	11.2614	13.7335	0	11.3667	21.4244	0	0	0	0	0
MSTRG.30562	12.3028	-3.42761	0.97508	-3.51521	0.000439408	0.00528819	Down	28.1535	21.5812	14.164	38.1597	10.7122	0	4.98853	0	5.26935	0
MSTRG.30033	49.9333	-2.08781	0.59401	-3.51477	0.000440137	0.00529376	Down	30.0304	91.2295	75.8188	146.144	61.5951	3.33865	28.9335	8.21879	20.0235	34.001
MSTRG.13739	158.651	-10.6326	3.02638	-3.51331	0.000442561	0.00531648	Down	0	822.047	0	355.616	408.849	0	0	0	0	0
HHLG34g0693	24.8069	2.04826	0.583891	3.50795	0.00045157	0.00540512	Up	14.0768	4.90481	6.66539	4.87146	17.8537	40.0638	64.8508	34.245	46.3703	14.1671
MSTRG.27280	75.1332	-2.31289	0.659946	-3.50467	0.000457174	0.00545905	Down	159.537	79.458	121.643	143.708	121.405	30.0478	14.9656	19.1772	0	61.3907
MSTRG.15901	300.908	2.04852	0.58471	3.50347	0.000459234	0.00547543	Up	260.889	45.1243	76.652	47.0908	156.22	251.512	1309.99	417.789	253.983	189.839
MSTRG.30970	6.86187	4.26382	1.21762	3.50176	0.000462191	0.0055053	Up	0	0	0	3.24764	0	17.8061	12.9702	8.21879	8.43096	17.945
MSTRG.28924	14.9888	2.48104	0.709587	3.49646	0.000471481	0.00558961	Up	1.8769	1.96193	9.99809	1.62382	7.14147	26.7092	9.97705	38.3544	21.0774	31.1676
MSTRG.31221	5.41132	6.05164	1.732	3.49402	0.00047581	0.0056359	Up	0	0	0	0	0	4.45153	5.98623	0	29.5084	14.1671
MSTRG.28659	7.31184	-6.19494	1.77387	-3.49233	0.000478833	0.00566327	Down	3.7538	4.90481	0	51.9622	12.4976	0	0	0	0	0
HHLG32g0281	6.1442	-5.942	1.70204	-3.49111	0.000481023	0.00567904	Down	6.56915	22.5621	0	25.1692	7.14147	0	0	0	0	0
MSTRG.30190	6.42862	-6.0079	1.7225	-3.4879	0.000486827	0.00573523	Down	13.1383	2.94289	24.9952	0	23.2098	0	0	0	0	0
HHLG10g0638	3.55279	-5.15178	1.47749	-3.48685	0.000488754	0.00575154	Down	9.3845	7.8477	7.49856	8.1191	2.67805	0	0	0	0	0
HHLG31g0793	26.8888	-2.38945	0.685732	-3.48453	0.000493011	0.00578964	Down	30.9689	33.3527	52.49	55.2098	54.4537	2.22577	8.97935	0	9.48483	21.7229
MSTRG.25316	6.48709	-6.02251	1.72994	-3.48134	0.000498916	0.00584862	Down	0	9.80963	13.3308	38.1597	3.57073	0	0	0	0	0
HHLG34g0143	29.3869	2.73479	0.786016	3.4793	0.000502725	0.00588807	Up	0	7.8477	3.3327	4.87146	22.3171	17.8061	58.8646	79.4483	74.8248	24.5563
MSTRG.24116	29.3606	-2.62691	0.755007	-3.47933	0.000502677	0.00588807	Down	54.4301	41.2004	36.6596	95.8053	24.9951	6.6773	0	2.7396	8.43096	22.6673
HHUNg0669	3.54466	-5.1514	1.48144	-3.4773	0.000506487	0.00591819	Down	4.69225	4.90481	10.8313	10.5548	4.46342	0	0	0	0	0
MSTRG.29364	18.1536	2.62747	0.755639	3.47715	0.000506784	0.00591933	Up	6.56915	0	8.33174	4.05955	6.24878	56.757	48.8876	13.698	10.5387	26.4452
MSTRG.25729	25.9291	-2.96771	0.853861	-3.47564	0.00050964	0.00594271	Down	18.769	29.4289	34.9933	100.677	46.4195	8.90307	4.98853	0	0	15.1115
MSTRG.30661	4.26931	-5.42	1.56022	-3.47388	0.000512997	0.00597252	Down	2.81535	3.92385	24.9952	6.49528	4.46342	0	0	0	0	0
MSTRG.2532	81.8941	-2.9945	0.862593	-3.47151	0.000517541	0.00601378	Down	92.9066	23.5431	258.284	30.8526	322.259	24.4834	0	10.9584	8.43096	47.2236
MSTRG.20027	248.396	3.27733	0.944193	3.47104	0.000518442	0.00602249	Up	5.6307	3.92385	182.465	19.4858	20.5317	730.051	495.86	265.741	463.703	296.564
MSTRG.13020	23.7704	-3.36792	0.971493	-3.46675	0.000526793	0.00609636	Down	44.1072	52.972	47.4909	26.793	44.6342	0	0	16.4376	5.26935	0
MSTRG.20779	28.8877	2.58943	0.747806	3.4627	0.000534785	0.00617986	Up	19.7075	5.88578	0	4.05955	11.6049	38.9509	48.8876	97.2557	20.0235	42.5012
MSTRG.3411	32.1503	3.42745	0.99056	3.46012	0.000539938	0.00623216	Up	0	18.6383	0	0	8.92683	75.6761	61.8577	52.0524	59.0167	45.3346
MSTRG.8789	840.196	2.01291	0.58189	3.45926	0.000541663	0.00624664	Up	92.9066	149.106	1103.96	209.473	112.478	1507.96	1363.86	2002.65	1218.27	641.296
HHLG5g0985	10.8261	4.54003	1.31442	3.45402	0.000552306	0.00634545	Up	0	0	0	0	4.46342	51.1926	4.98853	16.4376	27.4006	3.77789
MSTRG.25901	67.7789	-5.34329	1.54961	-3.44815	0.000564436	0.00645494	Down	106.983	138.316	49.1573	301.218	66.0586	0	0	0	0	16.056
HHLG9g0048	4.97788	5.92785	1.7199	3.44662	0.000567637	0.006486	Up	0	0	0	0	0	14.4675	12.9702	5.4792	16.8619	0
MSTRG.8800	56.6533	-2.88	0.836042	-3.4448	0.000571472	0.00652606	Down	25.3382	21.5812	152.471	180.244	119.62	14.4675	5.98623	0	5.26935	41.5568
HHLG10g0251	30.285	-2.01383	0.584851	-3.44333	0.000574605	0.00655808	Down	42.2303	67.6864	17.4967	94.1815	21.4244	6.6773	18.9564	8.21879	13.7003	12.2781
HHUNg1757	22.9995	-2.69074	0.78364	-3.43364	0.000595537	0.0067582	Down	45.0456	34.3337	35.8265	49.5265	34.8146	0	12.9702	0	13.7003	3.77789
MSTRG.8627	25.2046	-2.90908	0.847312	-3.4333	0.000596284	0.00676281	Down	33.7842	49.0481	34.1601	74.6957	30.3512	3.33865	12.9702	13.698	0	0
MSTRG.31638	11.0929	2.53877	0.739763	3.43186	0.000599446	0.00679341	Up	5.6307	3.92385	3.3327	0	3.57073	8.90307	20.9518	16.4376	27.4006	20.7784
HHLG50g0055	5.40451	6.0443	1.76127	3.43178	0.000599626	0.00679341	Up	0	0	0	0	0	26.7092	2.99312	9.58859	14.7542	0
HHLG41g0196	3.54404	-5.14858	1.5006	-3.43101	0.000601346	0.00680858	Down	3.7538	7.8477	11.6644	3.24764	8.92683	0	0	0	0	0
HHLG49g0410	13.8641	3.43255	1.00085	3.42964	0.000604393	0.00683141	Up	3.7538	0	0	0	8.03415	24.4834	21.9495	43.8336	15.8081	20.7784
MSTRG.12300	34.7226	2.15762	0.62924	3.42892	0.000605982	0.00684743	Up	26.2766	3.92385	5.83222	9.74291	17.8537	42.2896	31.9266	49.3128	131.734	28.3342
MSTRG.13681	151.45	-2.57196	0.750327	-3.42779	0.000608519	0.00687218	Down	286.227	47.0862	667.372	27.6049	268.698	36.7251	37.9128	5.4792	31.6161	105.781
MSTRG.26067	71.1608	2.07005	0.605836	3.41686	0.000633486	0.00712179	Up	33.7842	15.6954	53.3231	10.5548	23.2098	94.5951	25.9403	287.658	96.9561	69.8909
MSTRG.17824	35.2505	-2.14269	0.627557	-3.41434	0.000639356	0.00717562	Down	62.8762	37.2766	49.9904	86.0624	50.8829	11.1288	0	21.9168	11.5926	20.7784
HHLG16g0909	5.92563	-5.88948	1.72664	-3.41096	0.000647347	0.00725303	Down	12.1999	17.6573	25.8284	0	3.57073	0	0	0	0	0
MSTRG.21832	81.8903	2.84576	0.834542	3.40996	0.000649715	0.00727106	Up	0	21.5812	13.3308	27.6049	37.4927	86.8049	27.9357	71.2296	56.909	476.014
HHLG29g0760	3.59453	-5.16764	1.51584	-3.40909	0.000651797	0.00728646	Down	3.7538	8.82867	5.83222	3.24764	14.2829	0	0	0	0	0
HHUNg0207	39.8104	-2.02232	0.593273	-3.40874	0.000652633	0.00729171	Down	90.0912	37.2766	34.9933	79.5671	77.6634	5.56442	2.99312	16.4376	24.239	29.2786
MSTRG.20559	143.908	2.14616	0.629646	3.40852	0.000653175	0.00729454	Up	112.614	11.7716	99.1477	21.1096	20.5317	127.982	111.743	190.402	559.605	184.172
MSTRG.1414	6.24798	-5.96683	1.75156	-3.40658	0.000657818	0.00733521	Down	7.5076	0	4.16587	9.74291	41.0634	0	0	0	0	0
MSTRG.23498	4.65644	5.82969	1.7119	3.4054	0.000660681	0.00735477	Up	0	0	0	0	0	13.3546	10.9748	9.58859	12.6464	0
MSTRG.22250	336.036	-2.844	0.835418	-3.40428	0.000663381	0.00738276	Down	240.243	43.1624	1749.67	129.094	787.347	125.756	69.8394	79.4483	52.6935	83.1135
HHLG26g0249	5.59404	-5.80768	1.70612	-3.40404	0.000663982	0.00738574	Down	13.1383	0	19.9962	4.05955	18.7463	0	0	0	0	0
HHLG49g0265	5.69368	-5.83283	1.71633	-3.39843	0.000677736	0.00749637	Down	5.6307	18.6383	7.49856	25.1692	0	0	0	0	0	0
HHLG9g0286	5.83283	-5.86606	1.72635	-3.39795	0.000678926	0.00750745	Down	0	27.467	13.3308	3.24764	14.2829	0	0	0	0	0
HHLG30g0352	100.454	2.76146	0.81286	3.39721	0.000680764	0.00752358	Up	4.69225	0	46.6577	18.6739	58.9171	328.301	32.9243	139.72	151.757	222.895
HHLG45g0501	29.8563	2.65498	0.782189	3.3943	0.000688043	0.00758297	Up	4.69225	0	26.6616	4.87146	4.46342	55.6442	93.7843	38.3544	47.4242	22.6673
HHUNg1181	4.87841	5.89355	1.7363	3.39432	0.000687989	0.00758297	Up	0	0	0	0	0	14.4675	0	20.547	5.26935	8.50025
MSTRG.17649	62.6096	-2.43581	0.718142	-3.39183	0.000694284	0.00763904	Down	99.4757	101.039	29.9943	232.206	66.0586	33.3865	7.98164	0	29.5084	26.4452
MSTRG.10745	100.339	10.2607	3.02656	3.39021	0.000698381	0.00767351	Up	0	0	0	0	0	0	296.318	424.638	282.437	0
MSTRG.28643	9.34291	-6.54645	1.93184	-3.3887	0.000702238	0.00771162	Down	30.9689	27.467	34.9933	0	0	0	0	0	0	0
MSTRG.31201	13.3699	4.67726	1.38097	3.38692	0.000706811	0.00774261	Up	0	0	1.66635	3.24764	0	24.4834	8.97935	0	8.43096	86.8914
HHLG39g0286	7.55523	3.50471	1.03543	3.3848	0.000712309	0.00779193	Up	0	0	3.3327	0	2.67805	13.3546	11.9725	23.2866	10.5387	10.3892
HHLG32g0686	16.4739	2.65013	0.783617	3.38192	0.000719809	0.00786549	Up	0	5.88578	5.83222	7.30719	3.57073	13.3546	67.844	12.3282	31.6161	17.0005
MSTRG.5491	10.4685	-2.88719	0.854508	-3.37877	0.000728108	0.00793655	Down	31.9073	18.6383	16.6635	14.6144	10.7122	0	2.99312	0	6.32322	2.83342
MSTRG.18696	8.00007	-4.23142	1.25289	-3.37733	0.000731926	0.00796944	Down	15.0152	21.5812	6.66539	27.6049	5.3561	0	0	0	0	3.77789
HHLG18g0105	43.3649	-2.31816	0.686508	-3.37675	0.000733488	0.00798208	Down	35.6611	37.2766	128.309	30.0407	130.332	22.2577	14.9656	0	16.8619	17.945
MSTRG.714	18.4292	-2.75598	0.816426	-3.37566	0.000736385	0.00800265	Down	32.8458	24.5241	28.3279	50.3384	24.1024	0	8.97935	10.9584	4.21548	0
MSTRG.4444	29.5744	-2.15556	0.638735	-3.37473	0.00073888	0.00802538	Down	62.8762	61.8007	29.1611	38.9717	49.0976	12.2417	13.9679	6.849	0	20.7784
MSTRG.14357	5.82401	-5.86581	1.73878	-3.37352	0.000742131	0.00805629	Down	3.7538	13.7335	0	30.0407	10.7122	0	0	0	0	0
MSTRG.4347	25.743	-2.67252	0.793504	-3.368	0.000757152	0.0081703	Down	61.9377	37.2766	59.9885	32.4764	31.2439	0	7.98164	0	18.9697	7.55577
MSTRG.30906	18.4334	2.36144	0.701225	3.3676	0.000758268	0.00818012	Up	9.3845	11.7716	4.16587	4.87146	0	47.854	19.9541	27.396	40.0471	18.8894
HHLG16g0555	19.4098	-2.92246	0.867948	-3.3671	0.00075964	0.00818382	Down	71.3222	25.505	19.9962	37.3478	16.961	4.45153	0	10.9584	0	7.55577
MSTRG.21318	8.21604	6.64892	1.97562	3.36548	0.000764113	0.00821422	Up	0	0	0	0	0	0	0	31.5054	42.1548	8.50025
MSTRG.229	25.2499	-2.05448	0.610655	-3.36439	0.000767129	0.00823773	Down	30.9689	40.2195	48.3241	17.862	66.0586	22.2577	7.98164	8.21879	2.10774	8.50025
MSTRG.18956	6.29866	-5.37172	1.59854	-3.3604	0.000778305	0.00834198	Down	0	7.8477	19.9962	28.4168	5.3561	0	0	1.3698	0	0
HHLG22g0681	17.5536	-4.78537	1.42426	-3.35991	0.000779683	0.00834999	Down	43.1687	55.9149	0	54.3979	16.0683	0	5.98623	0	0	0
HHLG14g0616	5.23349	-5.71169	1.70039	-3.35905	0.000782104	0.00837142	Down	17.8306	0	19.163	7.30719	8.03415	0	0	0	0	0
MSTRG.14592	26.2284	2.88234	0.858106	3.35896	0.000782377	0.00837208	Up	0	15.6954	7.49856	8.1191	0	34.4994	28.9335	95.8859	44.2626	27.3897
HHLG1g0673	5.21393	-5.70568	1.69995	-3.35639	0.000789673	0.00844108	Down	17.8306	0	11.6644	5.68337	16.961	0	0	0	0	0
MSTRG.21323	7.27482	-3.66333	1.09242	-3.3534	0.00079826	0.00851456	Down	17.8306	10.7906	7.49856	7.30719	24.1024	2.22577	2.99312	0	0	0
MSTRG.8031	16.8174	2.51646	0.750999	3.35081	0.000805752	0.00858227	Up	8.44605	4.90481	5.83222	3.24764	2.67805	8.90307	10.9748	32.8752	14.7542	75.5577
HHLG15g0570	10.8818	-3.19829	0.954953	-3.34916	0.000810579	0.00861823	Down	20.6459	20.6002	27.4947	26.793	2.67805	4.45153	2.99312	0	3.16161	0
MSTRG.21900	224.155	-3.07309	0.918762	-3.34482	0.000823367	0.00872326	Down	646.592	364.918	274.114	525.305	192.82	28.935	71.8348	0	119.087	17.945
HHLG10g0106	36.8374	-2.04282	0.61083	-3.34433	0.000824826	0.00873468	Down	103.23	47.0862	30.8274	65.7647	49.9903	24.4834	15.9633	0	16.8619	14.1671
MSTRG.25170	19.4764	2.9045	0.8686	3.34388	0.000826145	0.00874631	Up	4.69225	11.7716	6.66539	0	0	28.935	22.9472	35.6148	18.9697	65.1686
HHLG20g0092	5.48753	-5.77866	1.72986	-3.34053	0.000836176	0.00882667	Down	19.7075	3.92385	12.4976	0	18.7463	0	0	0	0	0
MSTRG.2084	5.34296	-5.74273	1.71904	-3.34065	0.000835818	0.00882667	Down	0	7.8477	14.164	25.1692	6.24878	0	0	0	0	0
HHLG26g0164	7.78008	-3.85316	1.15354	-3.3403	0.000836874	0.00882935	Down	11.2614	11.7716	17.4967	13.8025	18.7463	0	0	0	0	4.72236
MSTRG.17604	150.867	-9.404	2.81604	-3.33945	0.000839458	0.00884994	Down	625.946	404.157	476.575	0	0	0	1.99541	0	0	0
MSTRG.29274	25.0496	2.31777	0.694938	3.33522	0.000852314	0.00895898	Up	5.6307	5.88578	13.3308	9.74291	7.14147	44.5153	69.8394	31.5054	60.0706	2.83342
MSTRG.25384	248.448	-2.18845	0.656598	-3.33302	0.000859087	0.00901588	Down	84.4605	115.754	106.646	1075.78	655.23	86.8049	149.656	30.1356	60.0706	119.948
MSTRG.1039	17.96	-2.81177	0.844137	-3.33094	0.000865539	0.00906446	Down	35.6611	9.80963	16.6635	56.0218	38.3854	0	1.99541	15.0678	3.16161	2.83342
MSTRG.10358	613.183	6.34823	1.90672	3.32939	0.000870353	0.00910376	Up	3.7538	3.92385	0.833174	65.7647	0	75.6761	214.507	4562.8	1204.57	0
HHLG49g0217	24.5874	2.31162	0.694313	3.32937	0.000870436	0.00910376	Up	0	3.92385	19.163	8.931	8.92683	56.757	22.9472	52.0524	31.6161	41.5568
HHLG44g0177	14.8383	-3.32248	0.998121	-3.32874	0.000872409	0.00911125	Down	10.323	25.505	32.4938	19.4858	47.3122	0	0	0	9.48483	3.77789
HHLG21g0349	4.94179	5.9148	1.77786	3.32692	0.000878117	0.00915521	Up	0	0	0	0	0	25.5963	2.99312	12.3282	0	8.50025
HHLG15g0090	15.2522	-2.01425	0.60674	-3.31979	0.000900842	0.00934698	Down	26.2766	8.82867	39.1592	30.0407	17.8537	8.90307	3.99082	5.4792	6.32322	5.66683
MSTRG.28708	10.1197	-3.46806	1.04462	-3.31993	0.000900398	0.00934698	Down	18.769	29.4289	11.6644	25.9811	7.14147	0	0	0	6.32322	1.88894
MSTRG.29602	46.9795	-2.35507	0.709512	-3.31928	0.000902506	0.00936036	Down	90.0912	91.2295	64.9876	94.1815	52.6683	46.7411	16.961	0	6.32322	6.6113
HHLG9g0512	8.79085	-6.45834	1.94615	-3.31852	0.000904962	0.00937855	Down	33.7842	31.3908	0	22.7335	0	0	0	0	0	0
MSTRG.31125	9.13276	-6.51318	1.97036	-3.30557	0.000947829	0.00973348	Down	53.4917	13.7335	0	0	24.1024	0	0	0	0	0
MSTRG.21317	30.5786	3.21959	0.976207	3.29806	0.000973562	0.00994949	Up	3.7538	4.90481	14.9971	4.05955	1.78537	30.0478	1.99541	169.855	70.6093	3.77789
MSTRG.30004	14.4467	2.91486	0.883799	3.2981	0.00097341	0.00994949	Up	0	4.90481	6.66539	0	5.3561	12.2417	43.899	27.396	32.67	11.3337
MSTRG.28533	21.171	-3.35827	1.01864	-3.29681	0.000977908	0.00998877	Down	39.4149	15.6954	6.66539	11.3667	119.62	0	0	6.849	7.37709	4.72236
MSTRG.5808	57.5527	2.01164	0.610195	3.29672	0.000978202	0.00998922	Up	27.2151	7.8477	37.4928	1.62382	40.1707	106.837	123.715	80.8181	87.4713	62.3351
HHLG14g0161	19.0546	-7.57468	2.29837	-3.29568	0.000981852	0.0100142	Down	0	121.639	3.3327	4.87146	60.7025	0	0	0	0	0
MSTRG.28496	195.696	5.44645	1.65392	3.29306	0.000991048	0.0100852	Up	0	0	36.6596	0	7.14147	506.362	704.38	290.397	402.579	9.44472
HHLG33g0347	57.4646	2.28757	0.694672	3.29303	0.000991155	0.0100852	Up	15.9537	11.7716	30.8274	38.9717	0	77.9018	55.8715	54.792	141.219	147.338
HHLG6g0900	27.8175	2.82297	0.858759	3.28726	0.00101166	0.0102598	Up	11.2614	0	0	19.4858	3.57073	44.5153	66.8463	38.3544	51.6397	42.5012
HHLG33g0226	23.5487	-3.09079	0.940218	-3.28731	0.00101149	0.0102598	Down	29.092	8.82867	112.478	24.3573	35.7073	5.56442	0	10.9584	0	8.50025
MSTRG.30624	370.581	4.26511	1.29751	3.28715	0.00101206	0.0102612	Up	0	0	27.4947	77.9433	77.6634	801.276	985.733	1016.39	505.858	213.451
MSTRG.28707	7.4545	5.32166	1.61952	3.28595	0.0010164	0.0103026	Up	0	0	0	0	1.78537	0	5.98623	10.9584	46.3703	9.44472
MSTRG.27001	18.0334	4.7987	1.46082	3.28494	0.00102005	0.0103343	Up	0	0	0	0	6.24878	31.1607	31.9266	95.8859	0	15.1115
MSTRG.7489	149.087	-2.47499	0.753484	-3.28474	0.00102078	0.0103391	Down	9.3845	82.4009	145.805	829.772	196.39	32.2736	96.7774	27.396	34.7777	35.8899
MSTRG.3197	24.1502	-2.25791	0.687535	-3.28407	0.00102321	0.0103557	Down	80.7067	55.9149	32.4938	22.7335	8.03415	6.6773	3.99082	5.4792	17.9158	7.55577
HHLG18g0401	7.47331	4.23764	1.29077	3.28302	0.00102701	0.0103863	Up	0	3.92385	0	0	0	8.90307	11.9725	21.9168	24.239	3.77789
HHLG16g0508	13.6665	-2.08847	0.636619	-3.28057	0.00103599	0.0104638	Down	29.092	7.8477	20.8293	34.9121	17.8537	4.45153	3.99082	5.4792	8.43096	3.77789
MSTRG.31349	17.0529	-3.12873	0.95387	-3.28004	0.00103793	0.0104754	Down	15.0152	40.2195	31.6606	32.4764	33.922	7.79018	0	0	0	9.44472
MSTRG.22836	11.0887	-3.54983	1.08245	-3.27944	0.00104014	0.0104928	Down	15.0152	17.6573	46.6577	4.87146	17.8537	0	0	4.1094	0	4.72236
MSTRG.12724	100.496	2.79738	0.853341	3.27815	0.00104491	0.0105292	Up	9.3845	7.8477	7.49856	18.6739	83.0195	193.642	36.9151	30.1356	37.9393	579.906
MSTRG.24539	8.45121	-6.40185	1.95407	-3.27616	0.00105229	0.0105898	Down	24.3997	28.4479	0	31.6645	0	0	0	0	0	0
MSTRG.18140	5.97754	-5.90115	1.80127	-3.27611	0.00105246	0.0105898	Down	0	38.2576	3.3327	14.6144	3.57073	0	0	0	0	0
HHLG43g0406	3.07222	-4.9402	1.50893	-3.27398	0.00106044	0.0106486	Down	7.5076	7.8477	4.16587	4.05955	7.14147	0	0	0	0	0
MSTRG.29949	13.978	-3.042	0.929964	-3.27109	0.00107134	0.0107364	Down	40.3534	19.6193	47.4909	7.30719	9.81952	0	4.98853	5.4792	0	4.72236
HHLG13g0755	8.18918	3.40902	1.04289	3.26883	0.00107995	0.010809	Up	3.7538	0	0	3.24764	0	8.90307	9.97705	20.547	23.1852	12.2781
HHLG2g0654	15.6599	2.37157	0.725603	3.26842	0.00108151	0.0108155	Up	0	7.8477	3.3327	10.5548	3.57073	24.4834	17.9587	24.6564	17.9158	46.2791
HHLG27g0191	9.1938	-6.52448	1.99698	-3.26717	0.00108629	0.0108484	Down	0	0	55.8226	4.87146	31.2439	0	0	0	0	0
HHLG10g0509	4.60762	5.81513	1.78002	3.26689	0.00108734	0.0108557	Up	0	0	0	0	0	16.6932	16.961	9.58859	0	2.83342
HHLG36g0604	15.2413	-3.26851	1.00055	-3.26671	0.00108803	0.0108599	Down	13.1383	37.2766	13.3308	48.7146	25.8878	5.56442	0	0	0	8.50025
MSTRG.28405	8.69722	-3.48607	1.06736	-3.26608	0.00109048	0.0108755	Down	12.1999	24.5241	5.83222	25.9811	11.6049	0	0	0	2.10774	4.72236
HHLG10g0225	3.15446	-4.9787	1.52446	-3.26587	0.00109127	0.0108755	Down	4.69225	8.82867	3.3327	4.87146	9.81952	0	0	0	0	0
MSTRG.1720	88.0938	-2.25411	0.691052	-3.26186	0.00110684	0.0109924	Down	232.736	100.058	141.64	145.332	108.907	17.8061	28.9335	0	88.5251	17.0005
MSTRG.26644	9.50741	4.16417	1.2781	3.25809	0.00112164	0.0111102	Up	0	0	0	4.87146	0	35.6123	28.9335	8.21879	4.21548	13.2226
MSTRG.19012	116.834	-2.26611	0.695676	-3.25743	0.00112428	0.0111184	Down	369.749	72.5913	223.291	32.4764	269.59	57.8699	7.98164	12.3282	24.239	98.2251
HHLG12g0618	10.8128	4.78322	1.46864	3.2569	0.00112634	0.011136	Up	0	3.92385	0	0	0	26.7092	0	32.8752	29.5084	15.1115
HHLG13g0973	8.75034	3.50465	1.07612	3.25675	0.00112697	0.0111395	Up	3.7538	0	3.3327	0	0	4.45153	26.938	16.4376	13.7003	18.8894
MSTRG.17562	59.3868	2.02917	0.624137	3.25115	0.00114938	0.011318	Up	12.1999	9.80963	57.489	22.7335	14.2829	20.0319	123.715	178.074	51.6397	103.892
HHLG2g0269	10.6684	4.8072	1.47888	3.25057	0.00115176	0.0113338	Up	3.7538	0	0	0	0	14.4675	0	19.1772	30.5622	38.7233
HHLG13g1053	4.36774	5.73862	1.76581	3.24986	0.00115463	0.0113536	Up	0	0	0	0	0	13.3546	7.98164	5.4792	16.8619	0
MSTRG.30545	10.9485	-3.29706	1.01519	-3.24772	0.00116332	0.0114222	Down	11.2614	43.1624	23.3289	17.862	3.57073	5.56442	1.99541	2.7396	0	0
HHLG19g0747	10.1965	3.06705	0.944542	3.24713	0.00116574	0.0114318	Up	3.7538	3.92385	3.3327	0	0	17.8061	37.9128	5.4792	13.7003	16.056
HHLG41g0344	4.36959	5.73331	1.7677	3.24338	0.00118121	0.011555	Up	0	0	0	0	0	7.79018	7.98164	20.547	7.37709	0
HHLG31g0383	16.8486	-3.99136	1.23165	-3.24066	0.00119253	0.01162	Down	58.1839	8.82867	34.1601	7.30719	49.9903	10.0159	0	0	0	0
MSTRG.15491	6.84379	-4.33849	1.33934	-3.23927	0.00119834	0.0116624	Down	3.7538	8.82867	13.3308	8.1191	31.2439	0	0	0	3.16161	0
HHLG32g0140	5.25192	-5.71727	1.76505	-3.23916	0.00119882	0.0116625	Down	8.44605	0	28.3279	3.24764	12.4976	0	0	0	0	0
HHLG8g0283	5.11782	-5.67641	1.75304	-3.23804	0.00120352	0.0116899	Down	23.4613	15.6954	6.66539	0	5.3561	0	0	0	0	0
MSTRG.22156	16.4878	-3.83398	1.18471	-3.23623	0.00121118	0.0117413	Down	23.4613	36.2956	69.9866	24.3573	0	5.56442	0.997705	0	4.21548	0
HHLG24g0468	4.40806	5.7542	1.77813	3.2361	0.00121176	0.0117441	Up	0	0	0	0	0	0	15.9633	5.4792	17.9158	4.72236
MSTRG.30069	37.6159	-2.54796	0.787573	-3.23521	0.00121555	0.0117751	Down	171.736	27.467	13.3308	100.677	8.03415	10.0159	21.9495	10.9584	6.32322	5.66683
HHLG13g0151	7.46839	6.50956	2.01249	3.23458	0.00121822	0.0117981	Up	0	0	0	0	0	0	0	43.8336	24.239	6.6113
MSTRG.28678	17.3478	-2.10915	0.652167	-3.23406	0.00122044	0.0118138	Down	26.2766	38.2576	19.163	18.6739	38.3854	10.0159	5.98623	8.21879	0	8.50025
MSTRG.15860	110.031	-2.53997	0.785528	-3.23345	0.00122304	0.0118332	Down	76.9529	28.4479	373.262	11.3667	449.02	53.4184	40.9059	8.21879	37.9393	20.7784
MSTRG.1210	86.0473	-7.26729	2.25007	-3.22981	0.00123874	0.0119676	Down	386.641	153.03	310.774	0	4.46342	5.56442	0	0	0	0
HHLG9g0171	2.7712	5.08444	1.57426	3.22974	0.00123904	0.0119676	Up	0	0	0	0	0	7.79018	6.98394	4.1094	3.16161	5.66683
MSTRG.29240	23.1946	-2.04606	0.63358	-3.22937	0.00124065	0.0119774	Down	41.2918	54.9339	38.326	34.9121	17.8537	8.90307	17.9587	0	7.37709	10.3892
MSTRG.5366	4.32734	5.7239	1.77366	3.22717	0.00125022	0.0120551	Up	0	0	0	0	0	6.6773	6.98394	9.58859	20.0235	0
MSTRG.14081	19.976	3.17679	0.985643	3.22306	0.00126829	0.0121961	Up	0	0	5.83222	13.8025	0	30.0478	31.9266	36.9846	35.8316	45.3346
MSTRG.1792	8.33644	-6.38225	1.98116	-3.22147	0.00127537	0.0122501	Down	36.5996	11.7716	34.9933	0	0	0	0	0	0	0
MSTRG.16398	12.4641	3.15268	0.980169	3.21647	0.0012978	0.0124087	Up	0	6.86674	3.3327	2.43573	0	13.3546	3.99082	35.6148	41.1009	17.945
HHLG36g0650	4.55378	5.79217	1.80274	3.21297	0.00131368	0.0125424	Up	0	0	0	0	0	0	4.98853	27.396	8.43096	4.72236
MSTRG.28677	19.357	3.21307	1.00007	3.21286	0.00131422	0.0125446	Up	0	0	13.3308	0	5.3561	33.3865	29.9312	52.0524	27.4006	32.112
MSTRG.12216	7.61028	6.54308	2.03828	3.2101	0.00132691	0.0126414	Up	0	0	0	0	0	6.6773	8.97935	0	0	60.4462
HHLG4g0872	11.4736	3.99244	1.24635	3.2033	0.00135863	0.0128819	Up	0	0	6.66539	0	0	14.4675	56.8692	13.698	12.6464	10.3892
MSTRG.12451	11.3668	-3.06442	0.956876	-3.20253	0.00136228	0.0129134	Down	19.7075	27.467	16.6635	21.1096	16.961	0	7.98164	0	0	3.77789
MSTRG.15396	63.3453	2.36923	0.7405	3.1995	0.00137665	0.0130186	Up	10.323	24.5241	13.3308	54.3979	0	55.6442	48.8876	121.912	148.596	155.838
MSTRG.6727	65.6335	2.23184	0.697773	3.19853	0.00138132	0.0130438	Up	10.323	38.2576	34.9933	25.1692	6.24878	117.966	14.9656	294.507	60.0706	53.8349
MSTRG.2992	1383.72	-2.25269	0.705131	-3.19471	0.00139973	0.0131586	Down	468.287	2731	918.158	6594.33	725.752	352.784	619.575	283.548	473.188	670.575
MSTRG.15233	25.1109	3.1073	0.973134	3.19309	0.0014076	0.0132201	Up	0	7.8477	6.66539	0	11.6049	20.0319	7.98164	106.844	22.1313	68.002
HHLG14g0030	16.5582	-3.6497	1.14354	-3.19159	0.00141493	0.0132684	Down	50.6763	31.3908	23.3289	17.862	30.3512	0	11.9725	0	0	0
MSTRG.15828	1133.33	-4.35435	1.36486	-3.19032	0.00142114	0.0133096	Down	39.4149	13.7335	5933.03	34.1002	4784.78	232.593	104.759	72.5994	56.909	61.3907
HHLG16g0636	21.231	-2.13431	0.669204	-3.18933	0.00142602	0.0133458	Down	50.6763	48.0672	25.8284	21.1096	27.6732	0	10.9748	4.1094	11.5926	12.2781
MSTRG.5942	56.5152	3.08451	0.968278	3.18556	0.00144473	0.0134861	Up	16.8921	3.92385	18.3298	9.74291	10.7122	105.724	35.9174	19.1772	0	344.732
HHUNg2294	6.83853	-3.99093	1.25461	-3.18101	0.00146764	0.0136519	Down	13.1383	21.5812	13.3308	4.05955	12.4976	0	0	0	0	3.77789
HHLG46g0856	28.1501	3.79408	1.19347	3.17903	0.00147769	0.0137229	Up	0	9.80963	9.16491	0	0	126.869	3.99082	16.4376	100.118	15.1115
HHLG6g0930	26.8033	2.07985	0.654587	3.17735	0.00148626	0.0137872	Up	9.3845	11.7716	0	21.1096	8.92683	41.1767	41.9036	61.641	30.5622	41.5568
HHLG4g0882	3.00581	-4.9079	1.54518	-3.17626	0.00149187	0.0138287	Down	7.5076	8.82867	3.3327	3.24764	7.14147	0	0	0	0	0
HHLG38g0448	9.09039	-4.72609	1.48804	-3.17604	0.00149299	0.0138295	Down	22.5228	0	16.6635	25.1692	23.2098	3.33865	0	0	0	0
MSTRG.29695	6.47981	4.48239	1.41198	3.17453	0.0015008	0.0138921	Up	0.93845	1.96193	0	0	0	2.22577	3.99082	2.7396	36.8855	16.056
MSTRG.5757	15.995	-2.65739	0.83786	-3.17163	0.00151584	0.0140052	Down	37.538	6.86674	59.9885	18.6739	15.1756	0	2.99312	4.1094	4.21548	10.3892
MSTRG.29667	18.7346	-2.65975	0.838888	-3.17056	0.00152146	0.0140376	Down	45.0456	13.7335	12.4976	68.2004	22.3171	0	13.9679	5.4792	4.21548	1.88894
MSTRG.18000	4.58258	-5.5185	1.74358	-3.16504	0.00155063	0.0142572	Down	5.6307	13.7335	0	12.1786	14.2829	0	0	0	0	0
MSTRG.6010	31.5081	-3.0491	0.963667	-3.16406	0.00155584	0.0142852	Down	44.1072	7.8477	60.8217	17.862	150.863	0	6.98394	0	10.5387	16.056
HHLG32g0886	4.61136	-5.52927	1.7487	-3.16194	0.00156723	0.0143612	Down	15.9537	0	17.4967	7.30719	5.3561	0	0	0	0	0
HHLG14g0379	9.82567	-2.79538	0.884431	-3.16065	0.00157418	0.0144137	Down	21.5844	7.8477	17.4967	24.3573	14.2829	0	2.99312	5.4792	4.21548	0
MSTRG.19379	14.2288	-4.62861	1.46509	-3.15926	0.00158168	0.014469	Down	39.4149	40.2195	9.99809	47.0908	0	5.56442	0	0	0	0
MSTRG.16961	10.5074	3.42311	1.08438	3.15675	0.00159538	0.0145709	Up	5.6307	0	3.3327	0	0	13.3546	5.98623	32.8752	31.6161	12.2781
HHLG34g0660	27.8393	2.02263	0.640973	3.15555	0.00160193	0.0146106	Up	12.1999	8.82867	20.8293	12.9906	0	55.6442	49.8853	41.094	49.5319	27.3897
HHLG50g0498	4.65506	-5.54332	1.75764	-3.15384	0.00161138	0.01468	Down	0	4.90481	19.163	7.30719	15.1756	0	0	0	0	0
HHLG3g0726	5.32236	-5.73299	1.81893	-3.15185	0.0016224	0.0147499	Down	0	35.3147	8.33174	2.43573	7.14147	0	0	0	0	0
HHLG31g0030	24.0979	4.31097	1.36913	3.14869	0.00164004	0.0148763	Up	7.5076	0	0	4.05955	0	0	4.98853	30.1356	133.842	60.4462
HHLG32g0223	13.4341	3.11624	0.989668	3.14878	0.00163956	0.0148763	Up	0	0	6.66539	0	7.14147	20.0319	30.9289	19.1772	30.5622	19.8339
HHLG31g0117	3.33763	-5.05783	1.60728	-3.14683	0.00165052	0.0149475	Down	3.7538	18.6383	4.16587	3.24764	3.57073	0	0	0	0	0
MSTRG.30927	190.201	3.34854	1.06476	3.14489	0.0016615	0.0150367	Up	3.7538	13.7335	14.9971	17.0501	120.512	375.042	53.8761	106.844	68.5016	1127.7
HHLG3g0585	15.7084	-2.65897	0.846405	-3.14148	0.00168095	0.0151644	Down	48.7994	14.7144	24.9952	16.2382	31.2439	4.45153	10.9748	0	0	5.66683
MSTRG.11620	1168.33	2.62295	0.835617	3.13894	0.0016956	0.0152586	Up	76.9529	72.5913	717.363	623.546	141.044	2097.78	4517.61	1084.88	2018.16	333.399
HHLG26g0293	4.45698	-4.2646	1.36039	-3.13483	0.00171954	0.0154286	Down	8.44605	5.88578	13.3308	10.5548	4.46342	0	0	0	0	1.88894
MSTRG.2707	150.667	3.95482	1.26203	3.1337	0.00172618	0.0154742	Up	0	56.8958	13.3308	21.1096	0	541.974	64.8508	424.638	222.367	161.505
MSTRG.14769	116.529	3.64868	1.16581	3.12974	0.00174959	0.0156522	Up	4.69225	0	9.16491	19.4858	52.6683	240.383	46.8921	60.2712	43.2087	688.52
MSTRG.11751	60.8673	2.11308	0.675237	3.12939	0.00175172	0.0156678	Up	39.4149	47.0862	3.3327	12.9906	11.6049	100.159	25.9403	221.907	62.1784	84.058
MSTRG.19206	30.9109	-2.29666	0.734246	-3.12791	0.00176052	0.0157248	Down	36.5996	33.3527	82.4842	25.1692	79.4488	5.56442	26.938	8.21879	0	11.3337
HHLG22g0244	7.90762	-3.91069	1.25052	-3.12724	0.00176455	0.0157471	Down	14.0768	21.5812	23.3289	5.68337	8.92683	0	0	5.4792	0	0
HHLG44g0586	9.72375	-3.26677	1.04599	-3.12313	0.00178941	0.0159399	Down	12.1999	29.4289	7.49856	24.3573	14.2829	0	3.99082	5.4792	0	0
HHLG13g0380	20.3184	2.05976	0.660685	3.11761	0.00182326	0.0161774	Up	4.69225	7.8477	3.3327	4.87146	18.7463	26.7092	49.8853	8.21879	41.1009	37.7789
MSTRG.21081	71.1872	-9.4341	3.02662	-3.11704	0.00182676	0.0161888	Down	0	0	220.791	0	490.083	0	0.997705	0	0	0
HHLG36g0467	4.94381	-5.62728	1.80612	-3.11568	0.00183523	0.0162466	Down	0	20.6002	4.16587	3.24764	21.4244	0	0	0	0	0
HHLG42g0018	3.87109	5.56227	1.78563	3.11502	0.00183932	0.0162648	Up	0	0	0	0	0	0	5.98623	15.0678	6.32322	11.3337
HHLG14g0799	18.8358	2.12555	0.682605	3.11389	0.00184641	0.0163239	Up	16.8921	3.92385	4.99904	3.24764	6.24878	20.0319	72.8325	16.4376	21.0774	22.6673
MSTRG.7733	18.479	-3.7331	1.20058	-3.10941	0.0018746	0.016522	Down	74.1376	1.96193	85.8169	7.30719	2.67805	6.6773	1.99541	0	4.21548	0
MSTRG.29294	68.0316	-9.41105	3.02664	-3.10941	0.00187464	0.016522	Down	211.151	177.554	291.611	0	0	0	0	0	0	0
MSTRG.430	54.0497	-5.58767	1.79787	-3.10794	0.00188395	0.0165791	Down	45.9841	0	209.96	21.9216	251.737	3.33865	0	0	0	7.55577
MSTRG.21816	11.5089	-5.67013	1.82441	-3.10793	0.00188403	0.0165791	Down	24.3997	20.6002	0	68.2004	0	0	0	0	0	1.88894
MSTRG.19408	62.0039	-4.41849	1.42212	-3.10696	0.0018902	0.0166187	Down	15.0152	92.2105	11.6644	462.788	10.7122	8.90307	3.99082	0	14.7542	0
HHLG48g0356	2.87227	-4.84732	1.56044	-3.10639	0.00189388	0.0166471	Down	3.7538	4.90481	9.99809	6.49528	3.57073	0	0	0	0	0
MSTRG.31160	14.682	2.28205	0.735346	3.10337	0.00191328	0.0167845	Up	5.6307	8.82867	3.3327	7.30719	0	13.3546	11.9725	27.396	36.8855	32.112
HHLG9g0532	7.1724	-3.36506	1.08497	-3.10153	0.0019252	0.0168667	Down	19.7075	15.6954	5.83222	16.2382	8.03415	2.22577	3.99082	0	0	0
MSTRG.23054	25.863	-3.34341	1.07886	-3.099	0.00194172	0.0169778	Down	76.0145	0	54.9895	51.1503	53.561	0	7.98164	0	7.37709	7.55577
HHLG31g0995	4.05831	5.632	1.81909	3.09605	0.00196118	0.0170916	Up	0	0	0	0	0	12.2417	16.961	8.21879	3.16161	0
HHLG7g0504	4.66016	-5.54483	1.79148	-3.09511	0.0019674	0.0171421	Down	4.69225	0	19.9962	4.05955	17.8537	0	0	0	0	0
MSTRG.29849	65.8297	-9.36359	3.02665	-3.09371	0.00197672	0.0172006	Down	221.474	193.25	0	243.573	0	0	0	0	0	0
MSTRG.14899	34.1694	2.17095	0.701773	3.09352	0.001978	0.0172048	Up	0	21.5812	19.163	10.5548	10.7122	96.8208	25.9403	82.1879	28.4545	46.2791
HHLG9g0424	4.32154	-5.4359	1.75785	-3.09235	0.00198577	0.017253	Down	7.5076	7.8477	9.99809	17.862	0	0	0	0	0	0
HHLG28g0620	17.8092	-2.03871	0.659549	-3.09107	0.00199439	0.0173014	Down	26.2766	43.1624	28.3279	30.8526	15.1756	4.45153	13.9679	0	7.37709	8.50025
HHLG24g0189	3.83362	5.54935	1.7973	3.08761	0.00201776	0.0174698	Up	0	0	0	0	0	4.45153	0	10.9584	11.5926	11.3337
MSTRG.14808	26.2213	4.14917	1.34395	3.08728	0.00201994	0.0174798	Up	0	0	0	3.24764	10.7122	84.5791	0	30.1356	12.6464	120.892
MSTRG.2204	13.6696	-2.35506	0.763149	-3.08598	0.00202881	0.0175235	Down	44.1072	17.6573	14.9971	19.4858	17.8537	8.90307	0	5.4792	6.32322	1.88894
MSTRG.29020	7.30292	-6.19216	2.00705	-3.08521	0.00203411	0.0175541	Down	0	21.5812	11.6644	39.7836	0	0	0	0	0	0
MSTRG.6847	340.491	2.78986	0.904915	3.083	0.00204922	0.017673	Up	123.875	47.0862	101.647	58.4575	99.0878	1349.93	61.8577	83.5577	1377.41	102.003
HHLG3g0757	14.3212	-2.41627	0.783818	-3.08269	0.00205137	0.0176877	Down	7.5076	24.5241	39.1592	36.5359	12.4976	5.56442	4.98853	8.21879	4.21548	0
MSTRG.14766	34.9245	-2.27898	0.739375	-3.0823	0.00205407	0.0177033	Down	26.2766	128.506	37.4928	63.3289	33.0293	8.90307	3.99082	39.7242	4.21548	3.77789
HHLG45g0333	24.9217	-2.46317	0.799732	-3.08	0.00207004	0.0178097	Down	22.5228	39.2385	14.164	108.796	25.8878	7.79018	11.9725	15.0678	0	3.77789
MSTRG.31616	36.1148	-3.51235	1.14176	-3.07625	0.0020962	0.0180047	Down	96.6604	54.9339	41.6587	138.837	0	16.6932	4.98853	0	7.37709	0
MSTRG.16275	20.6905	2.23543	0.726869	3.07543	0.00210201	0.0180422	Up	14.0768	0	5.83222	6.49528	9.81952	35.6123	68.8417	28.7658	24.239	13.2226
HHLG47g0394	5.8817	-4.06957	1.32346	-3.07494	0.00210544	0.0180599	Down	18.769	13.7335	3.3327	8.931	10.7122	3.33865	0	0	0	0
HHLG15g0008	6.51402	6.31797	2.0548	3.07474	0.00210685	0.0180681	Up	0	0	0	0	0	23.3705	3.99082	0	0	37.7789
MSTRG.3027	10.7412	-5.5647	1.8102	-3.07408	0.00211153	0.0181043	Down	38.4765	34.3337	32.4938	0	0	0	0	0	2.10774	0
HHLG2g0691	4.5951	-5.52142	1.80142	-3.06504	0.00217641	0.0185368	Down	10.323	19.6193	13.3308	0	2.67805	0	0	0	0	0
MSTRG.22249	67.7597	-2.62327	0.857085	-3.06069	0.00220825	0.0187758	Down	18.769	1.96193	256.618	49.5265	256.2	8.90307	16.961	19.1772	12.6464	36.8344
HHLG9g0391	16.7433	-2.00835	0.65665	-3.05848	0.00222464	0.0188857	Down	12.1999	23.5431	37.4928	52.7741	8.03415	5.56442	4.98853	6.849	8.43096	7.55577
MSTRG.15051	25.2386	3.75505	1.2296	3.05388	0.00225902	0.0191502	Up	12.1999	1.96193	3.3327	0	0	52.3055	0	10.9584	61.1245	110.503
MSTRG.5958	13.0069	-4.66522	1.52796	-3.05324	0.00226385	0.0191793	Down	50.6763	17.6573	51.6568	0	5.3561	0	0	0	0	4.72236
MSTRG.29287	6.85654	-3.35244	1.09803	-3.05314	0.00226461	0.0191812	Down	10.323	18.6383	15.8303	8.1191	9.81952	1.11288	0	0	0	4.72236
HHLG36g0577	7.45417	3.68811	1.21107	3.04532	0.0023243	0.0196116	Up	3.7538	0	0	1.62382	0	31.1607	1.99541	13.698	14.7542	7.55577
MSTRG.8501	7120.44	2.28876	0.752043	3.04339	0.00233932	0.0196714	Up	721.668	780.846	5356.47	3832.21	1405.08	8913.08	27743.2	11414.5	7371.82	3665.5
HHLG1g0875	6.03375	4.07568	1.34183	3.03739	0.00238635	0.0200163	Up	0	0	0	3.24764	0	22.2577	3.99082	5.4792	16.8619	8.50025
MSTRG.9144	11.5009	2.63852	0.870566	3.03081	0.00243899	0.0203719	Up	1.8769	3.92385	0	6.49528	3.57073	11.1288	33.922	32.8752	4.21548	17.0005
MSTRG.1488	60.9873	2.03731	0.672217	3.03074	0.00243958	0.0203725	Up	46.9225	19.6193	19.163	0	33.922	92.3693	116.732	102.735	126.464	51.946
MSTRG.18729	10.1222	4.54068	1.49835	3.03045	0.00244193	0.020374	Up	0	0	0	4.05955	0	18.919	50.883	0	17.9158	9.44472
MSTRG.30755	43.6311	-2.30681	0.761346	-3.02992	0.0024462	0.0203936	Down	85.399	123.601	64.1544	61.7051	28.5659	17.8061	36.9151	0	2.10774	16.056
HHLG35g0275	19.0562	2.05099	0.678307	3.02369	0.00249708	0.0207179	Up	15.0152	9.80963	7.49856	4.87146	0	26.7092	46.8921	30.1356	23.1852	26.4452
MSTRG.11399	27.5361	-2.69882	0.893005	-3.02218	0.00250964	0.020809	Down	10.323	43.1624	48.3241	97.4291	39.2781	0	8.97935	13.698	0	14.1671
MSTRG.2288	38.8137	-3.63819	1.20408	-3.02155	0.00251483	0.0208477	Down	0	4.90481	167.468	6.49528	180.322	8.90307	8.97935	6.849	4.21548	0
MSTRG.25009	25.6026	2.11445	0.70024	3.01961	0.00253103	0.0209384	Up	3.7538	4.90481	13.3308	8.1191	17.8537	33.3865	108.75	30.1356	26.3468	9.44472
MSTRG.20424	9.09568	-3.5419	1.1732	-3.01901	0.002536	0.0209751	Down	11.2614	20.6002	12.4976	23.5454	16.0683	0	6.98394	0	0	0
MSTRG.18425	124.309	3.39939	1.12731	3.0155	0.00256559	0.0211539	Up	3.7538	7.8477	3.3327	19.4858	73.2	214.786	31.9266	21.9168	80.0942	786.745
HHLG14g0032	12.365	-3.69592	1.22603	-3.01453	0.00257374	0.0211947	Down	49.7379	20.6002	6.66539	15.4263	22.3171	8.90307	0	0	0	0
HHLG12g0186	16.3209	3.11609	1.03435	3.01261	0.0025901	0.0213074	Up	0	13.7335	3.3327	0	0	31.1607	29.9312	32.8752	29.5084	22.6673
HHUNg0297	4.69345	-5.55114	1.84414	-3.01015	0.00261115	0.0214406	Down	5.6307	31.3908	6.66539	3.24764	0	0	0	0	0	0
MSTRG.17337	22.9278	-2.84635	0.946992	-3.00567	0.00264997	0.0217012	Down	10.323	11.7716	94.9818	30.8526	53.561	13.3546	4.98853	0	0	9.44472
MSTRG.837	301.487	-2.00334	0.667095	-3.00309	0.00267255	0.0218456	Down	389.457	66.7055	774.852	131.529	1050.69	281.559	79.8164	23.2866	88.5251	128.448
MSTRG.5602	10.7153	-2.55574	0.851332	-3.00205	0.00268172	0.021898	Down	20.6459	20.6002	19.9962	20.2977	9.81952	0	3.99082	5.4792	6.32322	0
HHLG20g0621	4.23388	-5.40517	1.80197	-2.99959	0.00270343	0.0220392	Down	0	16.6764	6.66539	15.4263	3.57073	0	0	0	0	0
HHLG44g0544	3.74249	5.51507	1.8389	2.99911	0.00270769	0.0220603	Up	0	0	0	0	0	14.4675	0	5.4792	13.7003	3.77789
HHLG10g0600	16.7791	-2.97538	0.992858	-2.99679	0.00272842	0.0221928	Down	38.4765	44.1433	24.9952	30.0407	11.6049	0	10.9748	0	0	7.55577
HHLG4g0178	4.72782	-5.56708	1.85823	-2.99591	0.00273628	0.0222436	Down	3.7538	0	6.66539	33.2883	3.57073	0	0	0	0	0
HHLG23g0310	2.73267	-4.77047	1.59273	-2.99516	0.00274305	0.0222845	Down	6.56915	7.8477	3.3327	2.43573	7.14147	0	0	0	0	0
MSTRG.8001	43.0989	2.30895	0.771864	2.99139	0.00277708	0.0224966	Up	31.9073	21.5812	0	4.87146	14.2829	124.643	100.768	24.6564	69.5555	38.7233
MSTRG.3905	134.885	3.78339	1.26621	2.98796	0.00280846	0.0226722	Up	5.6307	0	14.9971	7.30719	63.3805	198.093	22.9472	58.9014	64.2861	913.304
HHLG1g0283	3.53552	5.43203	1.81819	2.98761	0.00281167	0.0226844	Up	0	0	0	0	0	5.56442	0	9.58859	12.6464	7.55577
HHLG46g0567	4.21236	-5.39597	1.80697	-2.98619	0.00282473	0.0227482	Down	3.7538	19.6193	0	8.931	9.81952	0	0	0	0	0
HHLG33g0613	6.06045	-3.80996	1.27669	-2.98426	0.00284263	0.0228693	Down	15.0152	12.7525	12.4976	12.9906	3.57073	0	0	0	0	3.77789
MSTRG.297	39.4789	-2.36261	0.792858	-2.97987	0.00288372	0.0231472	Down	89.1528	24.5241	89.1496	59.2694	68.7366	3.33865	19.9541	0	36.8855	3.77789
HHLG17g0241	5.69008	6.11726	2.05286	2.97987	0.0028837	0.0231472	Up	0	0	0	0	0	17.8061	0	23.2866	15.8081	0
HHLG13g0583	26.9343	-2.50605	0.841025	-2.97976	0.00288478	0.0231475	Down	45.0456	22.5621	34.9933	63.3289	63.3805	6.6773	0	0	21.0774	12.2781
MSTRG.16883	53.3478	-2.26215	0.75926	-2.97942	0.00288799	0.0231685	Down	45.0456	66.7055	128.309	98.241	103.551	0	5.98623	12.3282	14.7542	58.5573
HHLG40g0637	4.44942	-5.47755	1.83923	-2.97818	0.00289965	0.0232234	Down	3.7538	0	12.4976	3.24764	24.9951	0	0	0	0	0
HHLG25g0008	3.5546	5.44196	1.82914	2.97514	0.00292855	0.023409	Up	0	0	0	0	0	15.5804	5.98623	5.4792	0	8.50025
HHLG36g0039	25.3597	2.13705	0.718592	2.97395	0.00293996	0.0234719	Up	0	4.90481	13.3308	8.1191	20.5317	20.0319	29.9312	35.6148	56.909	64.2241
HHLG34g0144	3.95777	5.59383	1.8815	2.97307	0.00294833	0.0235245	Up	0	0	0	0	0	3.33865	0	12.3282	21.0774	2.83342
MSTRG.8490	2.67516	-4.74201	1.59608	-2.97104	0.00296791	0.023657	Down	3.7538	7.8477	8.33174	3.24764	3.57073	0	0	0	0	0
MSTRG.10536	10.2469	4.5288	1.52435	2.97097	0.00296863	0.023658	Up	0	0	4.16587	0	0	12.2417	9.97705	32.8752	43.2087	0
MSTRG.17332	204.992	-2.94042	0.990147	-2.96968	0.00298113	0.0237168	Down	320.95	318.813	709.031	152.639	312.439	0	70.8371	10.9584	121.195	33.0565
MSTRG.18836	50.7535	-8.98835	3.02679	-2.9696	0.00298191	0.0237168	Down	237.428	78.477	191.63	0	0	0	0	0	0	0
MSTRG.14478	69.296	3.94229	1.32869	2.96705	0.00300671	0.0238611	Up	3.7538	0	9.99809	0	28.5659	163.594	36.9151	27.396	32.67	390.067
MSTRG.20809	16.7282	-3.28325	1.10709	-2.96567	0.00302029	0.0239355	Down	30.0304	87.3057	2.49952	0.81191	31.2439	5.56442	0.997705	0	3.16161	5.66683
HHLG30g0388	27.4535	-3.86037	1.30202	-2.9649	0.00302779	0.0239662	Down	101.353	0	12.4976	86.8743	56.239	10.0159	0	0	0	7.55577
HHLG12g0740	3.93815	-4.06279	1.37169	-2.96188	0.00305771	0.0241502	Down	4.69225	8.82867	9.99809	6.49528	7.14147	2.22577	0	0	0	0
MSTRG.9077	35.7523	-2.48596	0.839375	-2.96168	0.00305967	0.0241609	Down	60.0608	28.4479	124.976	28.4168	61.5951	7.79018	0	2.7396	36.8855	6.6113
MSTRG.23709	6.47318	-6.01647	2.03229	-2.96044	0.00307198	0.0242343	Down	28.1535	21.5812	14.9971	0	0	0	0	0	0	0
MSTRG.13704	109.378	3.20909	1.08432	2.95955	0.00308093	0.0242854	Up	12.1999	6.86674	8.33174	38.1597	41.0634	72.3374	43.899	532.852	336.185	1.88894
MSTRG.24345	31.5355	2.50239	0.845834	2.95849	0.00309151	0.024335	Up	3.7538	13.7335	19.9962	0	9.81952	63.4343	3.99082	69.8598	76.9325	53.8349
MSTRG.26143	16.8381	-3.59934	1.21829	-2.95441	0.00313268	0.0245522	Down	102.291	5.88578	26.6616	6.49528	14.2829	2.22577	0	0	10.5387	0
HHLG31g0262	3.79838	5.53915	1.87654	2.95178	0.00315945	0.0247279	Up	0	0	0	0	0	17.8061	0	2.7396	4.21548	13.2226
MSTRG.29801	16.3606	-2.93051	0.993123	-2.9508	0.0031695	0.0247724	Down	35.6611	26.486	43.325	24.3573	15.1756	0	0	0	6.32322	12.2781
HHLG44g0438	20.034	-2.04091	0.692285	-2.94808	0.00319757	0.0249428	Down	39.4149	45.1243	34.1601	22.7335	19.639	4.45153	0	12.3282	7.37709	15.1115
MSTRG.19892	9.48808	2.39546	0.812891	2.94684	0.00321035	0.0250376	Up	2.81535	2.94289	6.66539	0	2.67805	24.4834	12.9702	23.2866	10.5387	8.50025
MSTRG.24631	23.1306	3.87342	1.31539	2.94468	0.00323284	0.0251735	Up	0	0	0	14.6144	0	18.919	141.674	27.396	12.6464	16.056
MSTRG.22509	17.6796	-2.56911	0.872536	-2.94441	0.00323567	0.0251857	Down	48.7994	11.7716	34.9933	25.1692	30.3512	0	10.9748	10.9584	0	3.77789
MSTRG.31396	4.65207	-4.32655	1.4701	-2.94304	0.00325003	0.0252727	Down	3.7538	6.86674	3.3327	5.68337	24.9951	0	0	0	0	1.88894
HHLG11g0629	3.51203	5.42737	1.84603	2.94001	0.00328196	0.0254762	Up	0	0	0	0	0	0	3.99082	5.4792	10.5387	15.1115
HHLG29g0427	3.97468	-5.31285	1.80713	-2.93993	0.00328284	0.025478	Down	0	15.6954	4.16587	6.49528	13.3902	0	0	0	0	0
MSTRG.27675	6.98114	-4.92502	1.67581	-2.93889	0.00329389	0.0255439	Down	43.1687	0	2.49952	12.9906	8.92683	2.22577	0	0	0	0
MSTRG.11733	6.09333	-3.77679	1.28667	-2.93532	0.00333199	0.025749	Down	10.323	3.92385	12.4976	19.4858	10.7122	0	3.99082	0	0	0
MSTRG.13419	6.17506	2.73403	0.931559	2.9349	0.00333653	0.0257641	Up	0	3.92385	0.833174	1.62382	1.78537	15.5804	6.98394	5.4792	9.48483	16.056
HHLG8g0101	5.56717	3.82623	1.30474	2.93257	0.0033617	0.025878	Up	3.7538	0	0	0	0	8.90307	17.9587	10.9584	8.43096	5.66683
MSTRG.31389	8.867	3.12928	1.06728	2.932	0.00336782	0.0259101	Up	3.7538	2.94289	0	2.43573	0	2.22577	6.98394	38.3544	16.8619	15.1115
HHLG49g0131	19.6653	2.48112	0.846277	2.93181	0.00336993	0.0259213	Up	4.69225	0	10.8313	0	14.2829	31.1607	35.9174	36.9846	31.6161	31.1676
MSTRG.8385	4.05572	-5.34451	1.82324	-2.93132	0.0033752	0.0259568	Down	8.44605	0	20.8293	3.24764	8.03415	0	0	0	0	0
HHLG3g0955	3.93805	-4.06704	1.38767	-2.93085	0.00338035	0.0259813	Down	11.2614	3.92385	6.66539	6.49528	8.92683	0	0	0	2.10774	0
HHLG32g0432	5.30875	6.02149	2.05506	2.93008	0.0033887	0.0260345	Up	0	0	0	0	0	22.2577	13.9679	0	16.8619	0
MSTRG.19425	18.0534	-3.50486	1.19685	-2.92841	0.00340706	0.0261411	Down	26.2766	64.7435	14.9971	58.4575	1.78537	0	1.99541	0	0	12.2781
MSTRG.30584	8.50317	-3.16717	1.08213	-2.92679	0.00342482	0.0262521	Down	3.7538	15.6954	24.9952	17.862	14.2829	4.45153	3.99082	0	0	0
HHLG24g0613	12.4411	4.3223	1.47845	2.92353	0.0034609	0.0264576	Up	0	0	5.83222	0	0	30.0478	42.9013	15.0678	30.5622	0
HHLG31g0327	3.94412	-5.30205	1.81362	-2.92346	0.0034616	0.0264576	Down	9.3845	13.7335	3.3327	12.9906	0	0	0	0	0	0
MSTRG.24954	63.4793	-2.18699	0.748137	-2.92325	0.00346404	0.026458	Down	124.814	54.9339	148.305	110.42	82.1269	15.5804	22.9472	8.21879	67.4477	0
HHLG34g0299	6.27716	-5.97329	2.04332	-2.92332	0.0034632	0.026458	Down	13.1383	0	17.4967	0	32.1366	0	0	0	0	0
MSTRG.3518	21.5337	-2.68273	0.918675	-2.92022	0.00349783	0.026631	Down	67.5684	41.2004	1.66635	42.2193	33.0293	2.22577	2.99312	20.547	1.05387	2.83342
MSTRG.16969	1055.31	2.85878	0.979265	2.91931	0.00350808	0.0266846	Up	34.7227	4.90481	694.034	456.293	88.3756	2209.07	2597.03	1027.35	1870.62	1570.66
MSTRG.19561	15.7558	2.72776	0.934559	2.91876	0.00351422	0.0267211	Up	7.5076	0	3.3327	0	9.81952	44.5153	9.97705	45.2034	12.6464	24.5563
MSTRG.28689	3.63103	5.46421	1.87259	2.918	0.00352287	0.0267613	Up	0	0	0	0	0	4.45153	4.98853	20.547	6.32322	0
HHLG13g0546	22.8732	-2.09663	0.719678	-2.91329	0.00357637	0.0271056	Down	23.4613	27.467	21.6625	87.6862	24.9951	12.2417	7.98164	10.9584	0	12.2781
MSTRG.18765	1062.68	-3.34698	1.14914	-2.91259	0.00358439	0.0271457	Down	259.012	95.1534	4837.41	85.2505	4399.14	445.153	44.8967	61.641	142.273	256.896
MSTRG.16531	58.6322	-2.9339	1.00849	-2.9092	0.00362355	0.0273953	Down	59.1224	23.5431	207.46	18.6739	209.781	41.1767	19.9541	0	0	6.6113
MSTRG.8041	12.517	-3.23954	1.1136	-2.90908	0.00362499	0.0274002	Down	11.2614	19.6193	14.164	60.8932	7.14147	0	0	5.4792	0	6.6113
MSTRG.5562	60.2016	-2.65503	0.91308	-2.90778	0.00364009	0.0274818	Down	223.351	7.8477	13.3308	162.382	112.478	24.4834	7.98164	16.4376	33.7239	0
MSTRG.31563	7.99228	4.50948	1.55342	2.90293	0.00369692	0.0278021	Up	0	0	0	3.24764	0	22.2577	17.9587	30.1356	6.32322	0
MSTRG.15715	19.5406	-2.04047	0.702973	-2.90263	0.00370049	0.0278131	Down	44.1072	23.5431	37.4928	17.862	34.8146	4.45153	10.9748	0	4.21548	17.945
MSTRG.10945	39.0668	2.32194	0.800478	2.90069	0.00372337	0.0279375	Up	5.6307	40.2195	2.49952	9.74291	7.14147	37.838	12.9702	150.678	102.225	21.7229
MSTRG.4208	5.40216	4.3357	1.49595	2.89828	0.0037521	0.0281107	Up	0	0	0	2.43573	0	22.2577	0.997705	15.0678	9.48483	3.77789
MSTRG.13066	10.4602	2.58848	0.893476	2.89708	0.00376648	0.028202	Up	3.7538	0	6.66539	0	4.46342	12.2417	18.9564	10.9584	30.5622	17.0005
HHUNg1336	3.91721	-5.29513	1.82814	-2.89646	0.003774	0.0282201	Down	3.7538	0	19.9962	6.49528	8.92683	0	0	0	0	0
MSTRG.14926	8560.03	2.83701	0.979883	2.89525	0.00378855	0.0282932	Up	5856.87	36.2956	684.869	334.507	3596.62	15232	16368.4	20948.3	9314.11	13228.3
MSTRG.7677	16.5328	2.00077	0.691597	2.89297	0.00381619	0.0284409	Up	3.7538	1.96193	9.99809	6.49528	10.7122	41.1767	5.98623	17.8074	40.0471	27.3897
HHLG32g0664	25.5973	-2.4589	0.850317	-2.89175	0.00383104	0.0285302	Down	104.168	15.6954	19.9962	6.49528	70.522	13.3546	11.9725	0	5.26935	8.50025
MSTRG.16922	18.3563	-2.60079	0.900759	-2.88733	0.00388531	0.0288533	Down	13.1383	66.7055	15.8303	55.2098	7.14147	2.22577	7.98164	0	2.10774	13.2226
MSTRG.26764	59.4744	-2.67617	0.927565	-2.88516	0.00391217	0.0289986	Down	155.783	72.5913	81.651	133.153	71.4147	3.33865	0	0	48.478	28.3342
MSTRG.31277	177.637	-2.04576	0.709204	-2.88459	0.00391922	0.0290347	Down	313.442	489.5	242.454	215.156	169.61	55.6442	169.61	67.1202	0	53.8349
MSTRG.8989	34.7371	8.73019	3.02727	2.88385	0.00392848	0.0290762	Up	0	0	0	0	0	0	0	182.183	126.464	38.7233
MSTRG.25686	46.1843	3.05287	1.05861	2.88386	0.00392835	0.0290762	Up	3.7538	15.6954	0	0	30.3512	64.5472	11.9725	46.5732	35.8316	253.118
HHLG31g0663	10.1788	-2.0416	0.70893	-2.87984	0.00397882	0.0293396	Down	15.0152	13.7335	17.4967	21.1096	14.2829	6.6773	0	5.4792	4.21548	3.77789
MSTRG.13171	119.281	-2.00656	0.696812	-2.87962	0.00398153	0.0293486	Down	329.396	253.088	24.9952	315.021	33.0293	13.3546	95.7797	19.1772	57.9629	51.0015
MSTRG.30378	17.4976	-2.98586	1.03785	-2.87696	0.00401532	0.0295539	Down	49.7379	24.5241	24.162	34.9121	21.4244	0	0	16.4376	0	3.77789
MSTRG.20738	23.93	-2.38972	0.830927	-2.87596	0.00402796	0.0296086	Down	76.0145	11.7716	73.3193	21.9216	17.8537	13.3546	0	5.4792	15.8081	3.77789
HHLG13g0994	7.5464	3.66027	1.27277	2.87584	0.00402951	0.0296145	Up	5.6307	0	0	0	0	15.5804	6.98394	9.58859	26.3468	11.3337
HHLG41g0444	7.09882	-3.67153	1.27711	-2.87486	0.00404205	0.0296902	Down	11.2614	25.505	9.99809	4.05955	15.1756	0	4.98853	0	0	0
MSTRG.18894	30.0246	2.14527	0.74633	2.87443	0.00404756	0.0297128	Up	9.3845	30.4098	0	11.3667	4.46342	73.4503	42.9013	26.0262	56.909	45.3346
HHLG40g0444	5.25345	4.17851	1.45375	2.8743	0.00404927	0.0297128	Up	2.81535	0	0	0	0	3.33865	21.9495	16.4376	4.21548	3.77789
HHLG4g0370	11.8636	-2.61582	0.910498	-2.87296	0.00406647	0.029798	Down	23.4613	3.92385	4.99904	51.9622	17.8537	4.45153	3.99082	0	4.21548	3.77789
MSTRG.6288	10.023	2.46878	0.859496	2.87236	0.00407423	0.029833	Up	1.8769	4.90481	0	3.24764	5.3561	7.79018	5.98623	23.2866	32.67	15.1115
HHUNg1214	12.7842	2.10216	0.732395	2.87025	0.00410142	0.0299659	Up	0	8.82867	3.3327	5.68337	6.24878	14.4675	20.9518	38.3544	15.8081	14.1671
HHLG47g0171	5.14179	5.97369	2.08167	2.86966	0.00410914	0.0300112	Up	0	0	0	0	0	21.1448	0	12.3282	0	17.945
HHLG5g0371	3.33834	5.35158	1.86822	2.86452	0.00417636	0.0303961	Up	0	0	0	0	0	4.45153	13.9679	5.4792	9.48483	0
MSTRG.6390	596.126	2.95543	1.03218	2.8633	0.0041925	0.0304913	Up	215.844	0	187.464	64.9528	212.459	482.991	432.006	1823.2	1645.09	897.248
HHLG37g0746	8.47244	2.82331	0.988286	2.85677	0.00427976	0.0310238	Up	3.7538	0	3.3327	3.24764	0	10.0159	8.97935	38.3544	9.48483	7.55577
MSTRG.30057	12.7562	2.55693	0.895128	2.8565	0.00428347	0.0310337	Up	5.6307	0	7.49856	0	5.3561	18.919	10.9748	21.9168	42.1548	15.1115
MSTRG.21646	24.5595	-2.73444	0.957664	-2.85532	0.00429935	0.0311204	Down	11.2614	37.2766	19.9962	127.47	17.8537	0	11.9725	0	8.43096	11.3337
MSTRG.29093	6.99723	4.17378	1.4635	2.85192	0.00434565	0.0313941	Up	3.7538	0	0	0	0	8.90307	44.8967	5.4792	3.16161	3.77789
MSTRG.29144	3.97567	-5.31667	1.86457	-2.85142	0.00435239	0.0314242	Down	5.6307	0	23.3289	8.1191	2.67805	0	0	0	0	0
MSTRG.26235	3.36129	5.36035	1.88433	2.8447	0.00444529	0.0319585	Up	0	0	0	0	0	3.33865	15.9633	9.58859	0	4.72236
MSTRG.29122	5.97307	-5.90019	2.07533	-2.84301	0.00446893	0.0320967	Down	30.0304	21.5812	0	8.1191	0	0	0	0	0	0
MSTRG.10959	10.8812	-2.71903	0.956615	-2.84235	0.00447829	0.0321407	Down	18.769	3.92385	24.9952	34.1002	12.4976	0	0	5.4792	5.26935	3.77789
MSTRG.28921	20.8506	-3.15646	1.11126	-2.84044	0.00450515	0.0322752	Down	73.1991	23.5431	6.66539	69.0123	15.1756	13.3546	0	0	0	7.55577
HHLG13g0998	8.11736	-3.17891	1.12022	-2.83776	0.00454308	0.0325002	Down	11.2614	29.4289	3.3327	9.74291	19.639	0	3.99082	0	0	3.77789
HHLG2g0235	4.89462	5.90652	2.0817	2.83736	0.00454889	0.03253	Up	0	0	0	0	0	0	8.97935	0	21.0774	18.8894
MSTRG.13310	98.7313	3.29975	1.16405	2.83471	0.00458679	0.0327011	Up	30.9689	17.6573	18.3298	0	24.1024	171.384	0.997705	343.82	212.882	167.172
MSTRG.2088	3.7194	-5.21948	1.84292	-2.83218	0.00462321	0.0329138	Down	10.323	2.94289	14.9971	8.931	0	0	0	0	0	0
HHLG14g0954	3.67724	-3.97363	1.40329	-2.83165	0.00463092	0.0329214	Down	7.5076	3.92385	9.16491	8.931	5.3561	0	0	0	0	1.88894
MSTRG.22772	42.7558	-2.1439	0.757106	-2.83171	0.00463003	0.0329214	Down	136.075	15.6954	13.3308	155.887	27.6732	16.6932	17.9587	10.9584	29.5084	3.77789
HHLG24g0221	5.03296	5.94046	2.09789	2.83163	0.00463107	0.0329214	Up	0	0	0	0	0	11.1288	0	19.1772	20.0235	0
HHLG20g0297	5.02152	3.76633	1.33123	2.8292	0.00466641	0.0330999	Up	0	0	3.3327	0	0	15.5804	6.98394	12.3282	6.32322	5.66683
MSTRG.28661	10.2531	-2.43476	0.860729	-2.82872	0.00467348	0.0331292	Down	28.1535	2.94289	23.3289	17.862	14.2829	3.33865	0	2.7396	4.21548	5.66683
HHLG27g0445	2.40638	-4.58944	1.62299	-2.82777	0.00468736	0.033198	Down	4.69225	3.92385	4.16587	3.24764	8.03415	0	0	0	0	0
HHLG14g0882	5.72512	-3.72781	1.3193	-2.8256	0.00471927	0.0333587	Down	17.8306	4.90481	8.33174	17.0501	5.3561	0	0	0	0	3.77789
HHLG15g0789	27.9382	2.98847	1.05803	2.82455	0.00473468	0.0334319	Up	0	0	6.66539	24.3573	0	63.4343	60.86	56.1618	26.3468	41.5568
MSTRG.15866	39.3881	-2.6685	0.945068	-2.82361	0.00474866	0.0334774	Down	16.8921	10.7906	224.957	8.931	78.5561	8.90307	12.9702	20.547	0	11.3337
HHLG38g0811	7.5057	-2.97959	1.05524	-2.8236	0.0047487	0.0334774	Down	12.1999	12.7525	14.9971	17.862	8.92683	0	1.99541	0	6.32322	0
HHLG5g0474	6.16733	3.68149	1.30386	2.82353	0.00474974	0.0334788	Up	0	0	0	0	4.46342	5.56442	5.98623	15.0678	12.6464	17.945
MSTRG.2449	8.5834	-5.23193	1.85307	-2.82338	0.00475198	0.0334829	Down	35.6611	19.6193	28.3279	0	0	2.22577	0	0	0	0
HHLG42g0486	3.19349	5.28282	1.87231	2.82154	0.00477931	0.0336574	Up	0	0	0	0	0	4.45153	5.98623	10.9584	10.5387	0
HHLG19g0055	3.60474	5.45242	1.93372	2.81965	0.00480755	0.0338185	Up	0	0	0	0	0	4.45153	0	24.6564	3.16161	3.77789
MSTRG.11869	16.0645	-2.35728	0.837014	-2.8163	0.00485809	0.0340614	Down	8.44605	18.6383	11.6644	71.448	24.1024	5.56442	8.97935	5.4792	6.32322	0
HHLG15g0785	3.33967	5.35685	1.90568	2.811	0.00493884	0.0345181	Up	0	0	0	0	0	4.45153	20.9518	0	4.21548	3.77789
MSTRG.12515	125.896	-2.03365	0.72435	-2.80755	0.00499206	0.03478	Down	174.552	51.991	337.435	17.862	430.273	97.9337	47.8899	6.849	33.7239	60.4462
HHUNg2192	11.274	-2.4264	0.864236	-2.80756	0.0049918	0.03478	Down	9.3845	10.7906	15.8303	22.7335	35.7073	3.33865	0	10.9584	2.10774	1.88894
MSTRG.559	52.7904	-2.3074	0.822056	-2.80686	0.00500272	0.034836	Down	60.0608	97.1153	9.16491	214.344	58.9171	13.3546	40.9059	0	9.48483	24.5563
HHLG30g0570	7.44551	-3.41178	1.21549	-2.80691	0.00500187	0.034836	Down	19.7075	9.80963	11.6644	16.2382	10.7122	0	0	0	6.32322	0
HHLG39g0465	8.36368	-2.78414	0.992305	-2.80573	0.00502022	0.0349334	Down	3.7538	13.7335	29.9943	11.3667	14.2829	5.56442	0	0	2.10774	2.83342
HHLG26g0415	10.4278	3.76181	1.34182	2.80352	0.00505484	0.0351252	Up	0	3.92385	0	3.24764	0	8.90307	0	38.3544	25.2929	24.5563
HHUNg1506	2.4324	-4.60769	1.64381	-2.80305	0.00506211	0.0351695	Down	3.7538	3.92385	3.3327	9.74291	3.57073	0	0	0	0	0
MSTRG.17504	35.7692	-8.48354	3.02705	-2.80258	0.00506953	0.0352149	Down	137.952	98.0963	121.643	0	0	0	0	0	0	0
MSTRG.5629	15.8465	-2.80705	1.00169	-2.8023	0.00507391	0.0352392	Down	29.092	17.6573	38.326	28.4168	24.9951	0	0	9.58859	0	10.3892
MSTRG.15757	23.8183	-2.04515	0.729892	-2.80199	0.00507888	0.0352661	Down	12.1999	15.6954	38.326	107.172	17.8537	13.3546	3.99082	16.4376	8.43096	4.72236
HHLG10g1068	21.0037	3.27828	1.17016	2.80156	0.00508563	0.0353021	Up	0	15.6954	0	4.05955	0	68.9988	10.9748	42.4638	62.1784	5.66683
HHLG33g0517	21.9285	-2.03719	0.727186	-2.80148	0.00508694	0.035305	Down	34.7227	31.3908	67.4871	12.1786	30.3512	0	7.98164	13.698	15.8081	5.66683
MSTRG.27619	8.55244	-4.25157	1.52025	-2.79662	0.00516401	0.0357526	Down	13.1383	21.5812	0	16.2382	30.3512	0	0	0	4.21548	0
MSTRG.12377	12.5109	-3.41544	1.22149	-2.79612	0.00517196	0.0357952	Down	50.6763	11.7716	33.327	0.81191	17.8537	6.6773	3.99082	0	0	0
MSTRG.22032	58.0597	-2.10362	0.752694	-2.79478	0.00519347	0.0358878	Down	137.952	71.6103	104.98	85.2505	71.4147	0	11.9725	9.58859	72.7171	15.1115
MSTRG.23363	663.047	-4.03521	1.44455	-2.79339	0.00521581	0.035961	Down	33.7842	17.6573	3019.42	12.9906	3165.46	218.125	20.9518	45.2034	5.26935	91.6138
MSTRG.10232	14.2649	-2.10958	0.755711	-2.79152	0.00524614	0.0361138	Down	6.56915	23.5431	13.3308	31.6645	41.0634	4.45153	6.98394	0	8.43096	6.6113
HHLG36g0198	3.61839	-5.17993	1.85594	-2.791	0.00525451	0.0361526	Down	0	7.8477	3.3327	17.862	7.14147	0	0	0	0	0
HHLG3g0247	13.7943	-2.84367	1.0189	-2.79093	0.00525565	0.0361542	Down	28.1535	27.467	31.6606	18.6739	15.1756	0	0	5.4792	0	11.3337
MSTRG.7545	22.1729	3.62621	1.29972	2.78999	0.005271	0.0362347	Up	0	6.86674	0	0	9.81952	28.935	61.8577	69.8598	0	44.3902
MSTRG.26340	100.355	-3.68079	1.32068	-2.78705	0.00531905	0.0364579	Down	9.3845	22.5621	467.411	12.9906	418.668	30.0478	4.98853	8.21879	0	29.2786
HHLG5g0364	14.9899	2.86247	1.02757	2.78567	0.00534171	0.0365565	Up	0	2.94289	7.49856	4.87146	2.67805	32.2736	15.9633	38.3544	45.3164	0
MSTRG.12736	14.6925	-2.60377	0.935491	-2.78332	0.00538055	0.0367654	Down	11.2614	30.4098	17.4967	51.1503	16.0683	6.6773	11.9725	0	0	1.88894
HHLG24g0235	18.1995	2.05823	0.739803	2.78213	0.00540038	0.0368756	Up	3.7538	16.6764	11.6644	3.24764	0	36.7251	21.9495	30.1356	29.5084	28.3342
MSTRG.27253	23.4117	-2.38567	0.858071	-2.78027	0.0054313	0.0370231	Down	31.9073	21.5812	96.6482	14.6144	31.2439	15.5804	0	16.4376	4.21548	1.88894
MSTRG.7250	225.478	-2.53386	0.911647	-2.77944	0.00544532	0.0370869	Down	646.592	256.031	409.922	359.676	250.844	31.1607	118.727	0	141.219	40.6123
HHLG2g0779	5.04017	5.94851	2.14068	2.77879	0.0054562	0.0371356	Up	0	0	0	0	0	0	9.97705	5.4792	0	34.9455
HHUNg1612	49.2473	2.69945	0.972369	2.77616	0.00550054	0.0373862	Up	3.7538	0	0	52.7741	8.92683	65.6601	76.8233	127.391	85.3635	71.7799
HHLG4g0766	12.458	-2.56171	0.923132	-2.77502	0.0055198	0.0374638	Down	31.9073	5.88578	11.6644	32.4764	24.9951	0	3.99082	0	4.21548	9.44472
MSTRG.14703	4.70841	5.8505	2.11468	2.76661	0.00566424	0.0382453	Up	0	0	0	0	0	0	27.9357	0	11.5926	7.55577
HHLG45g0041	8.18936	4.40213	1.59111	2.7667	0.00566264	0.0382453	Up	3.7538	0	0	0	0	4.45153	21.9495	36.9846	14.7542	0
MSTRG.20225	20.9718	2.09459	0.757387	2.76554	0.00568278	0.0383366	Up	22.5228	7.8477	2.49952	0	7.14147	40.0638	28.9335	32.8752	34.7777	33.0565
MSTRG.31404	6.44904	-3.16195	1.14383	-2.76435	0.00570355	0.0384376	Down	15.9537	17.6573	3.3327	12.1786	8.92683	2.22577	0	0	4.21548	0
MSTRG.222	25.3027	2.55298	0.923778	2.76363	0.00571625	0.0385167	Up	13.1383	20.6002	3.3327	0	0	76.7889	35.9174	42.4638	30.5622	30.2231
MSTRG.1231	17.8221	-2.52105	0.912932	-2.76149	0.00575379	0.0386683	Down	18.769	21.5812	36.6596	38.9717	35.7073	17.8061	5.98623	2.7396	0	0
MSTRG.30117	5.60239	-5.80988	2.10391	-2.76146	0.00575431	0.0386683	Down	6.56915	0	32.4938	0	16.961	0	0	0	0	0
MSTRG.21588	24.2787	3.66937	1.32906	2.76089	0.00576446	0.0387212	Up	0	13.7335	0	4.05955	0	93.4822	31.9266	34.245	65.34	0
HHLG37g0210	3.63122	-5.18354	1.87803	-2.7601	0.0057784	0.0387778	Down	15.0152	3.92385	0	13.8025	3.57073	0	0	0	0	0
MSTRG.15181	10.8328	3.22965	1.17045	2.75932	0.00579227	0.038855	Up	3.7538	6.86674	0	0	0	6.6773	10.9748	17.8074	53.7474	8.50025
MSTRG.5803	10.4062	4.80219	1.74063	2.75888	0.00580001	0.0388703	Up	0	1.96193	1.66635	0	0	0	27.9357	0	70.6093	1.88894
HHLG21g0386	3.59759	-5.16804	1.87323	-2.75889	0.00579978	0.0388703	Down	17.8306	5.88578	3.3327	0	8.92683	0	0	0	0	0
HHLG2g0148	3.43662	-5.10283	1.85004	-2.75823	0.0058115	0.038908	Down	0	14.7144	6.66539	4.05955	8.92683	0	0	0	0	0
HHUNg0101	10.7182	-3.12918	1.13496	-2.75709	0.0058319	0.0390052	Down	9.3845	11.7716	39.9923	30.8526	4.46342	0	0	0	3.16161	7.55577
MSTRG.30653	74.812	3.47061	1.25919	2.75621	0.00584749	0.0390898	Up	0	0	53.3231	4.87146	3.57073	229.254	123.715	130.131	120.141	83.1135
MSTRG.14048	24.9116	-3.20522	1.16342	-2.75498	0.00586949	0.0391907	Down	35.6611	13.7335	86.6501	6.49528	82.1269	0	0	5.4792	18.9697	0
MSTRG.19554	20.3737	-2.66767	0.969338	-2.75206	0.00592225	0.0395032	Down	43.1687	1.96193	14.164	93.3696	23.2098	5.56442	11.9725	8.21879	2.10774	0
MSTRG.25598	16.3039	2.88074	1.04684	2.75185	0.00592589	0.0395099	Up	0.93845	1.96193	6.66539	9.74291	0	20.0319	61.8577	54.792	4.21548	2.83342
HHLG50g0446	7.64294	6.54776	2.38021	2.75092	0.00594284	0.0396073	Up	0	0	0	0	0	24.4834	0	0	0	51.946
HHLG17g0122	14.2162	-2.05908	0.749029	-2.749	0.00597765	0.0397957	Down	37.538	28.4479	14.9971	9.74291	24.1024	0	11.9725	5.4792	4.21548	5.66683
MSTRG.9427	10.7496	3.86684	1.40664	2.74898	0.00597811	0.0397957	Up	0	0	4.16587	0	2.67805	32.2736	1.99541	0	38.9932	27.3897
HHLG44g0026	27.8092	-2.22067	0.808392	-2.74703	0.00601384	0.0400001	Down	20.6459	80.439	25.8284	93.3696	8.92683	17.8061	4.98853	0	14.7542	11.3337
MSTRG.18737	75.5477	-2.1351	0.777377	-2.74655	0.00602266	0.0400387	Down	88.2143	92.2105	292.444	2.43573	140.151	62.3215	9.97705	13.698	20.0235	34.001
MSTRG.12299	221.579	4.69511	1.71025	2.74528	0.00604587	0.0401728	Up	14.0768	0	0	68.2004	0	300.478	46.8921	597.232	999.069	189.839
HHLG16g0279	20.1162	-2.38087	0.86829	-2.74202	0.00610624	0.0404658	Down	16.8921	4.90481	27.4947	86.8743	32.1366	8.90307	4.98853	13.698	5.26935	0
HHLG34g0804	2.99095	5.19095	1.89309	2.74205	0.00610572	0.0404658	Up	0	0	0	0	0	8.90307	4.98853	5.4792	10.5387	0
HHLG14g0322	21.9458	-2.40603	0.877499	-2.74192	0.00610816	0.0404668	Down	37.538	31.3908	27.4947	18.6739	69.6293	0	18.9564	8.21879	0	7.55577
HHLG39g0657	10.4563	-2.5356	0.92476	-2.7419	0.00610843	0.0404668	Down	17.8306	5.88578	13.3308	34.1002	17.8537	0	3.99082	6.849	0	4.72236
HHLG10g1087	3.53774	-5.14732	1.87932	-2.73893	0.00616389	0.0407528	Down	5.6307	4.90481	0	19.4858	5.3561	0	0	0	0	0
MSTRG.18210	96.5992	2.20879	0.807311	2.73598	0.00621952	0.0410183	Up	21.5844	27.467	88.3164	4.05955	30.3512	391.735	12.9702	23.2866	143.326	222.895
MSTRG.28997	16.424	-2.01063	0.73487	-2.73603	0.00621852	0.0410183	Down	15.0152	32.3718	62.488	9.74291	11.6049	11.1288	3.99082	10.9584	3.16161	3.77789
MSTRG.29196	9.88212	2.91366	1.06523	2.73525	0.00623326	0.0410817	Up	4.69225	1.96193	1.66635	3.24764	0	10.0159	0.997705	34.245	4.21548	37.7789
MSTRG.17222	22.8552	-2.8452	1.04043	-2.73463	0.00624496	0.0411452	Down	67.5684	52.972	0.833174	44.655	34.8146	10.0159	12.9702	0	0	4.72236
HHUNg1245	4.59544	5.81017	2.1257	2.7333	0.0062704	0.0412767	Up	0	0	0	0	0	0	7.98164	21.9168	0	16.056
MSTRG.15187	14.2844	-2.59529	0.949859	-2.73229	0.00628958	0.0413563	Down	28.1535	16.6764	19.9962	53.586	4.46342	0	9.97705	0	5.26935	4.72236
HHLG25g0602	2.97372	5.1822	1.89688	2.73196	0.00629589	0.0413711	Up	0	0	0	0	0	4.45153	10.9748	9.58859	0	4.72236
HHLG33g0237	12.6132	3.64423	1.33554	2.72865	0.0063594	0.0416851	Up	0	5.88578	0	0	3.57073	0	10.9748	26.0262	30.5622	49.1125
HHLG34g0490	29.6283	-2.08561	0.764862	-2.72678	0.00639562	0.0418494	Down	58.1839	51.0101	54.1563	56.0218	20.5317	6.6773	0	5.4792	34.7777	9.44472
HHLG41g0324	2.89368	5.1492	1.88983	2.72469	0.00643616	0.0420504	Up	0	0	0	0	0	8.90307	2.99312	0	9.48483	7.55577
HHLG26g0715	5.75616	-5.84921	2.14767	-2.72352	0.00645899	0.0421504	Down	0	11.7716	0	42.2193	3.57073	0	0	0	0	0
MSTRG.3489	10.5058	4.23596	1.55569	2.72288	0.00647153	0.0422045	Up	0	1.96193	3.3327	0	0	0	82.8095	10.9584	3.16161	2.83342
MSTRG.11810	1620.24	-2.55273	0.937596	-2.72264	0.00647633	0.0422167	Down	646.592	429.662	7057.82	246.009	5463.22	688.875	326.25	117.803	429.979	796.19
MSTRG.11183	3.25543	-5.02628	1.84713	-2.72113	0.00650599	0.0423667	Down	7.5076	7.8477	5.83222	11.3667	0	0	0	0	0	0
MSTRG.2754	842.543	3.3042	1.21437	2.72091	0.00651019	0.0423862	Up	74.1376	101.039	135.807	240.325	223.171	2566.31	0	2649.19	1880.1	555.349
MSTRG.26078	3.47072	-5.11517	1.8806	-2.71998	0.00652868	0.0424797	Down	10.323	15.6954	3.3327	0	5.3561	0	0	0	0	0
MSTRG.25837	12.9066	-3.33186	1.22636	-2.71688	0.00659008	0.0427393	Down	8.44605	28.4479	34.1601	33.2883	13.3902	0	0	0	0	11.3337
MSTRG.17598	27.227	2.55595	0.941555	2.71461	0.00663539	0.0429839	Up	8.44605	0.980963	14.9971	0.81191	14.2829	28.935	102.764	54.792	45.3164	0.944472
HHLG26g0685	3.0057	5.1971	1.91496	2.71395	0.00664866	0.0430141	Up	0	0	0	0	0	0	4.98853	9.58859	12.6464	2.83342
MSTRG.6747	7.39761	6.49751	2.40073	2.70648	0.00680015	0.0437592	Up	0	0	0	0	0	0	0	32.8752	41.1009	0
HHLG19g0776	3.25647	-5.02689	1.85804	-2.70548	0.00682059	0.0438482	Down	13.1383	0	4.16587	8.1191	7.14147	0	0	0	0	0
MSTRG.957	29.1652	-8.18907	3.02724	-2.70513	0.0068278	0.0438804	Down	111.676	77.4961	102.48	0	0	0	0	0	0	0
HHLG3g0506	8.26143	4.12984	1.52691	2.70471	0.00683646	0.0439148	Up	0	0	0	0	4.46342	13.3546	18.9564	20.547	25.2929	0
HHLG2g0166	3.20244	-5.00386	1.85141	-2.70273	0.00687717	0.0441192	Down	5.6307	0	9.99809	5.68337	10.7122	0	0	0	0	0
HHLG17g0374	7.25041	4.3374	1.60525	2.702	0.00689228	0.0441871	Up	0	0	3.3327	0	0	0	5.98623	41.094	12.6464	9.44472
HHLG8g0028	10.7339	-2.36396	0.875178	-2.70112	0.00691066	0.0442728	Down	9.3845	22.5621	16.6635	30.8526	10.7122	5.56442	4.98853	0	0	6.6113
HHUNg0499	5.08554	-5.66982	2.10101	-2.69862	0.00696283	0.044518	Down	14.0768	0	22.4957	0	14.2829	0	0	0	0	0
MSTRG.14791	30.106	-2.36566	0.876737	-2.69826	0.0069703	0.0445524	Down	60.9993	16.6764	61.6549	38.1597	74.9854	0	21.9495	0	20.0235	6.6113
HHLG11g0668	10.3251	-2.35804	0.874442	-2.69662	0.00700475	0.0447265	Down	20.6459	9.80963	16.6635	25.9811	13.3902	0	6.98394	4.1094	0	5.66683
HHUNg1468	3.57711	-4.5476	1.68676	-2.69606	0.00701657	0.0447789	Down	0	4.90481	8.33174	7.30719	14.2829	0	0	0	0	0.944472
MSTRG.28007	16.0229	-2.60398	0.965954	-2.69576	0.00702283	0.0447869	Down	18.769	48.0672	22.4957	34.9121	13.3902	0	2.99312	2.7396	16.8619	0
MSTRG.8743	9.73965	-4.11302	1.52642	-2.69456	0.0070481	0.0448789	Down	17.8306	29.4289	8.33174	36.5359	0	0	0	0	5.26935	0
MSTRG.2152	22.5119	-2.32484	0.863069	-2.69369	0.00706653	0.0449642	Down	15.9537	63.7626	3.3327	96.6172	8.03415	3.33865	13.9679	6.849	9.48483	3.77789
HHUNg0293	10.4321	-3.40383	1.26393	-2.69305	0.00708009	0.0450073	Down	7.5076	11.7716	20.8293	16.2382	38.3854	0	0	9.58859	0	0
MSTRG.21525	28.2154	-2.016	0.74862	-2.69296	0.00708209	0.0450128	Down	14.0768	69.6484	22.4957	73.8838	46.4195	0	17.9587	5.4792	18.9697	13.2226
MSTRG.29153	10.9702	-4.29462	1.59493	-2.69267	0.00708831	0.0450236	Down	5.6307	47.0862	0	45.4669	6.24878	0	0	0	5.26935	0
HHLG12g0126	7.184	-4.0943	1.52346	-2.6875	0.00719887	0.0456238	Down	18.769	0	16.6635	12.9906	19.639	0	0	0	0	3.77789
MSTRG.29905	12.0268	-2.59537	0.967517	-2.68251	0.0073073	0.0461199	Down	29.092	23.5431	10.8313	21.9216	17.8537	0	11.9725	4.1094	0	0.944472
MSTRG.28500	32.9414	4.8147	1.79636	2.68025	0.00735662	0.0463356	Up	0	0	0	3.24764	8.03415	60.0957	31.9266	16.4376	0	209.673
MSTRG.26116	19.3947	-2.16884	0.810062	-2.67738	0.00742015	0.0466398	Down	3.7538	80.439	17.4967	34.9121	22.3171	4.45153	3.99082	5.4792	3.16161	17.945
MSTRG.26303	773.358	2.06587	0.772015	2.67594	0.00745196	0.046788	Up	160.475	415.928	167.468	269.554	477.586	4275.7	297.316	809.551	423.656	436.346
HHLG32g0280	3.24301	-5.01952	1.87653	-2.67489	0.00747527	0.0469121	Down	12.1999	3.92385	9.16491	0	7.14147	0	0	0	0	0
HHLG17g0054	3.50954	-5.13497	1.92125	-2.67273	0.00752372	0.0471122	Down	0	3.92385	3.3327	7.30719	20.5317	0	0	0	0	0
MSTRG.7048	7.51605	4.00642	1.50019	2.67061	0.00757125	0.0473426	Up	0	0	0.833174	0	3.57073	11.1288	15.9633	0	2.10774	41.5568
HHLG4g0005	11.067	-2.24968	0.844403	-2.66422	0.00771663	0.0479952	Down	16.8921	21.5812	20.8293	22.7335	9.81952	0	3.99082	0	6.32322	8.50025
MSTRG.16965	5.40899	-3.45163	1.29588	-2.66354	0.00773227	0.0480774	Down	9.3845	8.82867	4.99904	24.3573	1.78537	0	1.99541	2.7396	0	0
MSTRG.30377	37.1601	-2.21564	0.832026	-2.66294	0.00774611	0.0481444	Down	56.307	34.3337	62.488	103.113	49.9903	0	19.9541	0	18.9697	26.4452
MSTRG.20974	23.4427	-6.25855	2.35383	-2.65888	0.00784001	0.0486341	Down	131.383	1.96193	0	0	98.1952	0	0.997705	0	0	1.88894
MSTRG.16306	1580.53	2.46831	0.928597	2.65811	0.00785805	0.0487224	Up	61.9377	16.6764	1207.27	923.953	208.888	3565.68	3873.09	1602.66	2407.04	1938.06
MSTRG.29462	220.215	-4.18262	1.57406	-2.65722	0.0078787	0.0488352	Down	541.486	463.014	224.957	549.663	307.976	0	0	60.2712	0	54.7794
HHLG44g0339	4.91354	-5.61902	2.11537	-2.65629	0.00790068	0.0489409	Down	0	21.5812	14.164	0	13.3902	0	0	0	0	0
HHLG2g0603	27.5685	-2.15039	0.809706	-2.65576	0.00791293	0.0489939	Down	51.6148	33.3527	57.489	45.4669	37.4927	0	11.9725	0	23.1852	15.1115
MSTRG.31693	3.40446	-5.08998	1.91668	-2.65562	0.00791632	0.0490073	Down	20.6459	0	3.3327	6.49528	3.57073	0	0	0	0	0
HHLG11g0102	14.5976	-2.50147	0.942083	-2.65525	0.00792491	0.0490528	Down	28.1535	6.86674	24.162	15.4263	49.0976	8.90307	0	9.58859	0	3.77789
HHLG9g0751	21.3258	2.01324	0.758605	2.65387	0.00795741	0.0491698	Up	0	19.6193	7.49856	6.49528	8.92683	28.935	27.9357	10.9584	35.8316	67.0575
MSTRG.27781	966.307	-3.62507	1.36645	-2.65291	0.00798008	0.0492846	Down	143.583	52.972	4754.09	4.87146	3983.15	389.509	74.8279	34.245	46.3703	179.45
MSTRG.28919	9.26736	2.63589	0.993997	2.65181	0.00800623	0.0494192	Up	3.7538	5.88578	0	3.24764	0	13.3546	5.98623	38.3544	12.6464	9.44472
MSTRG.26723	2.659	5.0284	1.89696	2.65076	0.00803097	0.0495166	Up	0	0	0	0	0	5.56442	7.98164	0	7.37709	5.66683
HHUNg0833	10.4929	2.84709	1.07426	2.65027	0.00804273	0.049571	Up	0	8.82867	0	4.05955	0	17.8061	8.97935	27.396	18.9697	18.8894
MSTRG.29368	18.4693	2.9505	1.11451	2.64734	0.00811272	0.0498738	Up	3.7538	8.82867	3.3327	0	5.3561	96.8208	47.8899	0	7.37709	11.3337

## Sheet: S6
Supplementary Table 6. The DEGs of hybrid F1 carp muscle under hypoxia stress
Row.names	baseMean	log2FoldChange	lfcSE	stat	pvalue	padj	change	MF1N1	MF1N2	MF1N3	MF1N4	MF1N5	MF1H1	MF1H2	MF1H3	MF1H4	MF1H5
MSTRG.24748	20882.4	8.37349	0.41616	20.1208	4.84758e-90	1.80587e-85	Up	96.9124	70.3975	105.162	116.306	238.936	27152.2	58691.6	26579.3	22481.4	73292.1
MSTRG.24746	4356.48	7.48421	0.43435	17.2308	1.55896e-66	2.9038e-62	Up	44.8857	29.3323	25.8125	55.1376	86.6936	6617.54	11237.4	5690.7	3802.86	15974.4
MSTRG.28714	10126.3	8.30598	0.513658	16.1703	8.17623e-59	1.0153e-54	Up	41.8253	18.7727	34.4166	80.9834	142.727	14219.2	26424.7	12517	9962.88	37820.6
MSTRG.12942	7821.81	4.92934	0.3054	16.1406	1.32329e-58	1.23241e-54	Up	555.971	470.49	587.951	438.517	432.411	6903.53	18388.1	11894.2	15194.6	23352.3
MSTRG.2170	1272.99	7.72378	0.48814	15.8229	2.16384e-56	1.42792e-52	Up	12.2416	17.5994	10.5162	4.30763	15.8586	1616.36	1794.1	937.096	3247.88	5073.96
MSTRG.14107	1711.71	4.44061	0.280713	15.819	2.29983e-56	1.42792e-52	Up	185.664	146.661	183.555	141.29	96.2088	4204.22	3482.88	2179.75	2303.84	4193.05
MSTRG.23353	11047.7	8.63318	0.552693	15.6202	5.30251e-55	2.82192e-51	Up	32.6442	12.9062	28.6805	74.0912	128.983	14796.8	29741.4	12893.6	10213.7	42554.7
MSTRG.23352	985.515	8.57617	0.574061	14.9395	1.82407e-50	8.49403e-47	Up	3.06039	2.34658	0.956018	8.61526	10.5724	1448.14	2209.57	1241.68	801.849	4128.37
MSTRG.13964	7817.83	6.72243	0.464354	14.477	1.69385e-47	7.01123e-44	Up	48.9662	374.28	82.2175	89.5987	139.556	12431.1	20781.4	12329.2	13026.1	18875.9
MSTRG.1103	1739.15	3.73956	0.259427	14.4147	4.18232e-47	1.55804e-43	Up	166.281	246.391	300.19	206.766	291.798	2336.92	3839.83	3093.49	2504.3	4405.58
MSTRG.20374	2005.33	5.08816	0.356922	14.2557	4.13179e-46	1.39929e-42	Up	84.6708	102.076	108.986	141.29	135.327	1602.34	6587.74	2904.71	3333.8	5052.4
MSTRG.5611	2063.58	3.67138	0.261379	14.0462	8.12803e-45	2.52328e-41	Up	171.382	295.669	324.09	354.949	355.232	2800.94	5319.11	3578.09	3416.75	4019.54
MSTRG.10802	505.971	4.71188	0.353339	13.3353	1.44278e-40	4.13444e-37	Up	66.3085	28.159	23.9004	27.5688	40.1751	527.104	1190.22	1209.56	825.549	1121.16
MSTRG.18754	2750.84	5.7698	0.440601	13.0953	3.50266e-39	9.32033e-36	Up	64.2682	89.1701	70.7453	76.6758	194.532	2729.45	7445.59	3426.29	3131.36	10280.4
MSTRG.24885	5108.23	4.90844	0.376553	13.0352	7.71463e-39	1.91595e-35	Up	487.622	346.121	366.155	260.181	186.074	3708.66	13083	6982	13187.1	12475.4
MSTRG.3123	1048.03	4.80297	0.377758	12.7144	4.91916e-37	1.14533e-33	Up	25.5033	112.636	57.3611	72.3682	95.1516	1485.99	2117.11	1442.14	1832.8	3239.24
MSTRG.7974	2957.46	4.13244	0.329352	12.5472	4.11831e-36	9.02467e-33	Up	265.234	164.261	475.141	323.072	366.862	5484.83	6034.18	4003.34	3679.42	8778.3
MSTRG.23745	4401.03	5.55913	0.458127	12.1345	6.93578e-34	1.43544e-30	Up	100.993	272.204	124.282	174.89	242.108	2801.64	8544.52	4332.25	9871.04	17546.3
MSTRG.13243	2948.53	5.43867	0.452239	12.0261	2.59091e-33	5.07995e-30	Up	48.9662	334.388	114.722	67.199	100.438	4419.41	7459.63	4689.37	5105.37	7145.84
MSTRG.2070	2757.39	4.95163	0.416401	11.8915	1.31036e-32	2.44073e-29	Up	183.623	212.366	133.842	193.843	139.556	1260.99	6868.62	3714.33	8635.68	6231.05
MSTRG.6607	2850.99	4.27743	0.363107	11.7801	4.94346e-32	8.76946e-29	Up	453.958	207.673	320.266	145.598	270.653	3726.88	8083.41	3884.62	3647.82	7769.05
MSTRG.22587	6365.81	3.54305	0.304686	11.6285	2.95138e-31	4.99762e-28	Up	616.159	1312.91	872.844	955.432	1272.92	8524.79	10965.9	7597	13012.3	18527.9
MSTRG.17589	2724.6	7.62947	0.656906	11.6142	3.48894e-31	5.65102e-28	Up	6.12078	17.5994	18.1643	8.61526	86.6936	1815.43	6409.85	3323.14	3239.98	12320.4
MSTRG.24336	2823	5.61917	0.484078	11.608	3.75402e-31	5.82702e-28	Up	54.0669	200.633	100.382	111.998	96.2088	1475.47	6175.79	3041.91	5583.32	11390.2
MSTRG.17567	356.355	3.01031	0.261197	11.5251	9.86416e-31	1.46988e-27	Up	96.9124	58.6646	86.9976	88.7372	61.3199	577.572	620.27	504.066	548.062	920.951
MSTRG.17823	664.051	3.55723	0.309107	11.5081	1.20114e-30	1.721e-27	Up	106.094	99.7297	87.9536	76.6758	150.128	1845.57	690.49	980.886	1156.36	1446.62
MSTRG.21732	998.279	4.19404	0.366269	11.4507	2.33266e-30	3.21847e-27	Up	60.1877	139.622	122.37	124.06	70.8351	846.031	2176.8	1339.96	2787.71	2315.21
MSTRG.16232	316.216	4.19411	0.366606	11.4404	2.62798e-30	3.49644e-27	Up	28.5636	32.8521	17.2083	38.7687	46.5185	569.161	337.053	409.676	786.049	896.31
MSTRG.22865	4617.99	3.97466	0.350221	11.349	7.50059e-30	9.63516e-27	Up	675.326	612.458	491.393	481.593	501.132	3555.85	7577.83	5754.92	13048.8	13480.6
MSTRG.3465	2873.99	4.28924	0.379142	11.313	1.1313e-29	1.40481e-26	Up	230.549	221.752	242.828	340.303	362.633	3009.12	9858.79	4377.01	2527.01	7569.87
MSTRG.29439	1196.39	6.28947	0.565853	11.115	1.06016e-28	1.274e-25	Up	10.2013	66.8776	11.4722	14.6459	48.633	1787.39	1204.26	1044.14	4524.72	3251.56
MSTRG.4218	2668.19	5.66591	0.515498	10.9912	4.21493e-28	4.90684e-25	Up	83.6507	98.5564	165.391	109.414	58.1482	4051.41	8402.91	2700.36	964.787	10047.3
MSTRG.18048	2285.73	5.45307	0.496904	10.9741	5.09182e-28	5.74804e-25	Up	119.355	50.4515	216.06	59.4453	64.4916	1418.7	4785.44	2904.71	4438.81	8799.86
MSTRG.4869	3566.64	2.93751	0.268699	10.9324	8.07097e-28	8.84317e-25	Up	635.541	1210.84	684.509	673.713	914.512	4075.25	6352.51	5959.27	6310.12	8850.17
MSTRG.19938	674.572	4.18739	0.385036	10.8753	1.51125e-27	1.60854e-24	Up	114.255	73.9173	65.0092	62.8914	34.8889	548.133	1933.37	1139.5	1096.12	1677.63
MSTRG.847	5939.43	3.79835	0.349651	10.8633	1.72488e-27	1.78491e-24	Up	552.911	887.008	719.881	1061.4	761.212	4679.45	17264.6	7403.35	10872.4	15192.1
MSTRG.69	1075.25	2.81202	0.258939	10.8597	1.79247e-27	1.80473e-24	Up	296.858	227.618	362.331	220.551	232.593	1651.41	1768.36	1332.18	1826.87	2833.7
MSTRG.8412	2737.83	3.40831	0.315318	10.8091	3.11619e-27	3.05493e-24	Up	282.576	313.269	717.969	409.225	633.286	5217.77	5886.72	4496.7	3160.98	6259.8
MSTRG.23270	3240.94	4.6322	0.434964	10.6496	1.75079e-26	1.67236e-23	Up	367.247	161.914	387.187	194.705	144.842	1875.71	8929.55	4171.68	8383.87	7792.66
MSTRG.3146	9850.34	4.20076	0.398116	10.5516	4.99446e-26	4.65147e-23	Up	887.513	1060.66	549.71	683.19	1899.86	9737.41	33477	13261.4	16610.7	20335.9
MSTRG.13630	10172	2.42688	0.230774	10.5162	7.27107e-26	6.60657e-23	Up	3255.24	3606.7	3392.91	2725.01	2970.84	12182.3	15017.6	13696.4	24592.7	20280.4
MSTRG.22866	1341.51	4.13004	0.394155	10.4782	1.08756e-25	9.64644e-23	Up	191.784	133.755	196.94	115.444	86.6936	1014.26	3306.16	1432.4	2968.42	3969.23
MSTRG.12238	604.138	3.60249	0.345411	10.4296	1.8167e-25	1.5739e-22	Up	85.6909	83.3037	50.6689	93.0448	146.956	671.497	1227.67	842.706	1034.9	1804.94
MSTRG.26028	1010.46	2.91816	0.282354	10.3351	4.88993e-25	4.1401e-22	Up	232.59	221.752	187.379	253.289	285.455	1793.7	2855.58	1227.08	1151.42	1896.32
MSTRG.4301	2088.38	3.15315	0.306966	10.272	9.42421e-25	7.80178e-22	Up	395.81	719.227	263.861	292.057	440.869	4193.7	3083.8	2708.14	4971.07	3815.22
MSTRG.21517	3382.06	3.0325	0.299297	10.1321	3.98109e-24	3.22408e-21	Up	443.757	672.296	702.673	638.391	1226.4	5024.32	5044.09	5989.44	5065.87	9013.41
MSTRG.8231	581.04	3.45172	0.341274	10.1142	4.77768e-24	3.78687e-21	Up	79.5701	89.1701	80.3055	89.5987	148.014	478.74	1053.29	939.043	1151.42	1701.24
MSTRG.15701	6970.96	3.72075	0.372946	9.97667	1.92837e-23	1.49662e-20	Up	447.837	1066.52	1041.1	1040.72	1318.38	7177.59	11195.3	7831.52	22656.2	15934.4
MSTRG.8094	1185.33	5.05033	0.506377	9.97347	1.99143e-23	1.51401e-20	Up	120.375	62.1844	17.2083	76.6758	70.8351	1087.85	1318.95	1292.28	4760.73	3046.22
MSTRG.28105	775.767	3.45803	0.348159	9.93233	3.01145e-23	2.24371e-20	Up	94.8721	112.636	112.81	174.028	152.242	794.161	1472.26	751.234	2044.12	2049.3
MSTRG.13134	942.363	3.35621	0.345684	9.70891	2.76281e-22	2.0181e-19	Up	242.791	140.795	183.555	171.444	99.3805	898.601	1684.09	1187.18	2727.47	2088.31
MSTRG.18092	447.041	3.36127	0.351371	9.56615	1.10961e-21	7.94931e-19	Up	32.6442	51.6248	121.414	104.245	85.6364	665.189	1118.83	741.503	671.499	877.83
MSTRG.21107	434.832	2.67975	0.282386	9.48968	2.31746e-21	1.62891e-18	Up	105.073	134.928	100.382	134.398	112.067	457.712	839.121	570.237	746.549	1147.85
MSTRG.20557	332.665	2.17459	0.229412	9.47897	2.56807e-21	1.77164e-18	Up	124.456	90.3434	126.194	143.013	118.411	536.217	461.107	420.38	710.012	596.514
MSTRG.15370	5904	3.90655	0.412342	9.47406	2.69173e-21	1.82318e-18	Up	295.838	732.134	786.803	779.681	1096.36	7394.88	7071.08	5643.99	19067.6	16171.6
MSTRG.23744	591.293	4.99116	0.527439	9.46301	2.99209e-21	1.99043e-18	Up	13.2617	43.4118	17.2083	43.0763	63.4344	292.291	1247.56	673.386	1376.57	2142.73
MSTRG.10384	344.089	3.56535	0.380626	9.36705	7.45869e-21	4.87471e-18	Up	70.389	61.0111	26.7685	44.7993	65.5489	773.133	389.717	539.098	383.15	1087.28
MSTRG.11338	2724.86	2.30952	0.246854	9.35583	8.2949e-21	5.32776e-18	Up	781.42	983.218	628.104	1059.68	1121.73	4655.62	5530.94	4543.41	2823.26	5121.19
MSTRG.2399	673.151	3.90228	0.417485	9.34711	9.00729e-21	5.68726e-18	Up	41.8253	78.6105	72.6573	139.567	88.8081	576.17	1233.52	738.584	1423.97	2337.8
MSTRG.23912	1751.11	3.76494	0.403109	9.33974	9.65734e-21	5.99608e-18	Up	240.751	288.63	320.266	161.105	189.246	881.779	4719.91	2602.07	3349.6	4757.73
MSTRG.12191	758.46	3.8002	0.407669	9.32177	1.1442e-20	6.98769e-18	Up	143.838	114.983	112.81	98.2139	38.0606	657.479	1263.95	1028.57	1593.82	2532.87
MSTRG.19944	592.301	3.65051	0.39561	9.22753	2.7695e-20	1.66407e-17	Up	107.114	69.2242	86.9976	79.2604	94.0943	512.385	1721.54	626.677	712.974	1912.74
MSTRG.7376	3043.83	2.28311	0.248151	9.20046	3.56417e-20	2.10756e-17	Up	1166.01	775.545	1230.39	1231.12	783.415	3728.28	7281.74	5140.89	4573.11	4527.75
MSTRG.5930	309.847	7.30116	0.795103	9.18266	4.2058e-20	2.4218e-17	Up	5.10065	0	2.86805	6.03068	5.2862	35.7478	1739.1	550.775	414.75	338.811
MSTRG.10428	271.166	2.80333	0.305302	9.18215	4.22562e-20	2.4218e-17	Up	70.389	80.9571	86.9976	60.3068	41.2323	470.329	530.156	455.411	644.837	271.049
MSTRG.11828	873.074	-27.7764	3.02623	-9.17854	4.36956e-20	2.46635e-17	Down	2895.13	0	3029.62	2805.99	0	0	0	0	0	0
MSTRG.9859	138.593	5.93951	0.648172	9.16347	5.02539e-20	2.7531e-17	Up	12.2416	2.34658	0	3.4461	4.22896	85.5143	349.926	237.437	470.05	220.741
MSTRG.21574	210.324	2.95787	0.322754	9.16448	4.97879e-20	2.7531e-17	Up	34.6844	62.1844	60.2291	33.5995	49.6903	366.59	241.086	275.388	535.225	444.562
MSTRG.20111	1991.8	2.94592	0.322218	9.14261	6.09621e-20	3.29134e-17	Up	299.918	505.688	394.835	381.656	706.236	2387.39	3527.35	2148.61	4278.83	5287.51
MSTRG.1201	828.989	10.1487	1.11211	9.12561	7.1335e-20	3.79635e-17	Up	0	0	0	6.89221	0	1069.63	2813.45	1329.26	910.474	2160.18
MSTRG.4633	1993.2	3.54203	0.388956	9.10651	8.50761e-20	4.46386e-17	Up	284.616	177.167	466.537	359.256	287.569	2069.87	6690.73	4403.28	1734.05	3458.96
MSTRG.4809	970.473	4.63101	0.508721	9.10324	8.76738e-20	4.53627e-17	Up	65.2883	53.9714	29.6365	116.306	111.01	1335.28	3429.04	1375.97	431.537	2756.69
MSTRG.23596	177.428	3.45099	0.379273	9.09896	9.12005e-20	4.6541e-17	Up	24.4831	29.3323	27.7245	36.1841	30.6599	109.346	365.14	410.649	400.925	339.838
MSTRG.12908	416.014	4.64201	0.512952	9.04961	1.4348e-19	7.22304e-17	Up	57.1273	21.1192	39.1967	31.8765	10.5724	249.534	1537.8	554.668	565.837	1092.41
MSTRG.16148	1945.21	2.33905	0.259749	9.00502	2.15619e-19	1.0569e-16	Up	562.092	842.423	713.189	479.008	614.256	3199.78	2383.95	2354.9	4743.95	3558.55
MSTRG.23714	2380.96	3.25596	0.362105	8.99175	2.43331e-19	1.17725e-16	Up	511.085	444.677	575.523	355.81	368.977	1319.86	5232.51	3670.54	5224.86	6105.79
MSTRG.1633	668.142	3.14997	0.350683	8.98238	2.64984e-19	1.26557e-16	Up	100.993	102.076	197.896	158.521	116.296	633.647	1323.63	953.639	976.637	2118.09
MSTRG.26530	882.119	2.42802	0.270397	8.97947	2.72075e-19	1.28299e-16	Up	296.858	237.005	288.717	327.38	231.535	1065.42	1658.35	1163.83	1171.17	2380.92
MSTRG.1811	5424.58	9.24327	1.03191	8.95744	3.3229e-19	1.54735e-16	Up	10.2013	23.4658	6.69212	6.89221	42.2896	3951.88	701.023	787.239	25160.5	23555.6
MSTRG.5661	564.925	2.53517	0.283693	8.93631	4.02372e-19	1.85056e-16	Up	135.677	156.048	190.248	169.721	179.731	1575.01	626.122	945.854	688.287	982.553
MSTRG.9783	269.529	10.3496	1.16341	8.89587	5.79644e-19	2.63335e-16	Up	0	0	0	0	2.11448	363.085	745.495	397.998	32.5875	1154.01
MSTRG.4377	579.183	3.9826	0.448159	8.88656	6.30299e-19	2.82898e-16	Up	56.1072	45.7583	104.206	80.9834	57.0909	1053.51	500.898	437.896	1150.44	2304.94
MSTRG.4934	433.641	3.07989	0.34798	8.85077	8.69202e-19	3.85481e-16	Up	74.4695	82.1304	114.722	98.2139	88.8081	593.693	444.722	488.497	1370.65	980.5
MSTRG.23004	105.195	4.12819	0.470863	8.76728	1.83034e-18	8.02183e-16	Up	8.16104	23.4658	3.82407	9.47678	12.6869	267.057	287.899	112.88	155.037	171.459
MSTRG.9768	160.877	10.1823	1.16629	8.73052	2.53506e-18	1.09812e-15	Up	0	0	0	0	1.05724	252.337	423.656	238.41	18.7625	674.543
MSTRG.15544	423.435	2.90756	0.334335	8.69655	3.42125e-18	1.46496e-15	Up	64.2682	143.142	66.9212	87.0141	137.441	761.918	449.403	577.049	994.412	952.779
MSTRG.17798	1601.74	2.72235	0.313091	8.69509	3.46561e-18	1.46709e-15	Up	315.22	411.825	337.474	362.702	680.862	2800.24	2422.57	1852.78	2250.51	4583.2
MSTRG.9774	146.559	10.0477	1.16313	8.63855	5.6929e-18	2.38289e-15	Up	0	0	0	0	1.05724	236.216	359.289	220.894	18.7625	629.368
MSTRG.3774	4449.17	3.05778	0.355489	8.6016	7.86102e-18	3.25385e-15	Up	1439.4	638.27	969.402	877.033	845.792	3345.57	6571.36	6438.04	11867.8	11499.1
MSTRG.10490	1344.31	2.26376	0.264742	8.55084	1.22194e-17	5.00229e-15	Up	423.354	497.475	372.847	528.115	494.788	1858.18	3077.95	2168.07	1249.19	2773.12
MSTRG.13228	6806.82	2.67924	0.314645	8.51512	1.66413e-17	6.66599e-15	Up	1318.01	2415.81	2705.53	1196.66	1556.26	6289.51	12750.7	10927	13863.5	15045.3
MSTRG.3903	2640.36	3.26426	0.383486	8.51206	1.7087e-17	6.77171e-15	Up	575.353	332.041	449.328	339.441	792.93	3019.64	3196.15	2728.58	6676.48	8293.69
MSTRG.14999	2199.54	2.5613	0.301627	8.49163	2.03764e-17	7.99034e-15	Up	507.005	815.437	524.854	467.808	872.223	2121.74	3454.79	3175.23	5099.45	4956.91
MSTRG.21064	39.5428	8.73438	1.02945	8.48448	2.16694e-17	8.40886e-15	Up	0	0	0	0	0	42.7571	78.4115	107.041	80.9749	86.2429
MSTRG.26653	70.3426	9.56611	1.13009	8.46494	2.56283e-17	9.84258e-15	Up	0	0	0	0	0	90.4208	215.339	51.5744	49.375	296.717
MSTRG.1780	17909.3	2.05108	0.24415	8.40091	4.43045e-17	1.66715e-14	Up	5329.16	7998.32	6144.33	8750.52	6591.89	19017.1	33567.2	22922.4	37703.7	31068
MSTRG.7726	12630.5	3.53812	0.421721	8.38974	4.87235e-17	1.8151e-14	Up	985.446	1910.12	1807.83	2233.07	3074.45	11239.5	15818.1	12072.3	39794.2	37369.9
MSTRG.4026	2986.6	3.19327	0.381027	8.38067	5.26254e-17	1.94104e-14	Up	740.614	321.482	603.247	748.666	528.62	2561.92	8835.93	6075.07	2698.84	6751.59
MSTRG.23311	615.274	9.23048	1.10218	8.37473	5.53511e-17	2.02156e-14	Up	8.16104	0	0	0	2.11448	780.844	1466.41	590.672	475.975	2828.56
MSTRG.4933	488.638	3.40136	0.407266	8.3517	6.72861e-17	2.4336e-14	Up	97.9325	84.477	128.106	46.5224	65.5489	609.114	605.056	434.003	1541.49	1274.14
MSTRG.26035	1185.02	2.62848	0.315143	8.34059	7.39202e-17	2.64783e-14	Up	222.388	185.38	263.861	525.531	451.441	2036.22	2196.69	1963.72	1530.62	2474.35
MSTRG.25169	184.082	5.74988	0.689703	8.33675	7.6361e-17	2.68728e-14	Up	16.3221	5.86646	7.64814	1.72305	2.11448	44.86	629.633	205.324	460.175	467.149
MSTRG.11230	285.819	4.63016	0.555402	8.33659	7.64641e-17	2.68728e-14	Up	51.0065	10.5596	19.1204	6.03068	24.3165	129.673	677.616	646.139	566.824	726.905
MSTRG.29082	566.594	3.80678	0.456792	8.33374	7.83305e-17	2.72715e-14	Up	75.4896	73.9173	64.0532	43.0763	121.583	269.16	1990.72	941.962	808.762	1277.22
MSTRG.21606	6609.43	2.3648	0.284005	8.32663	8.31755e-17	2.86901e-14	Up	1428.18	2195.23	2897.69	1606.75	2617.73	7333.2	15905.8	12201.7	8735.42	11172.6
MSTRG.18479	5624.58	3.15576	0.379062	8.32517	8.42101e-17	2.87805e-14	Up	610.038	1084.12	658.696	1841.08	1480.14	7052.83	9641.11	6308.62	9874.99	17694.2
MSTRG.25101	352.959	2.52511	0.30419	8.30108	1.03167e-16	3.4939e-14	Up	71.4091	124.369	65.9652	132.675	127.926	460.515	853.164	536.179	458.2	699.184
MSTRG.13151	449.827	4.95265	0.5969	8.29727	1.06528e-16	3.57521e-14	Up	15.302	23.4658	16.2523	17.2305	68.7206	541.123	249.278	325.016	1485.2	1756.69
MSTRG.21023	2608.22	2.01081	0.243029	8.27395	1.29597e-16	4.3106e-14	Up	986.466	851.809	1535.36	969.216	841.563	3953.28	5362.41	2983.53	3907.53	4691
MSTRG.13785	1208.23	2.79762	0.338712	8.25959	1.46174e-16	4.81897e-14	Up	274.415	288.63	453.152	182.643	320.344	911.218	2703.44	1932.58	2186.32	2829.59
MSTRG.1519	1703.72	2.16057	0.262172	8.24106	1.70694e-16	5.57794e-14	Up	538.629	549.1	617.587	875.31	532.849	3506.79	2337.13	1647.46	3154.07	3278.26
MSTRG.28648	280.878	3.07617	0.374342	8.21752	2.0775e-16	6.67181e-14	Up	32.6442	49.2782	44.9328	77.5373	93.0371	358.179	704.534	279.28	492.762	676.596
MSTRG.8200	11839.6	2.9084	0.354735	8.19879	2.42825e-16	7.7316e-14	Up	1675.05	2804.17	2695.01	2992.94	3748.97	14948.9	14969.6	10601	36146.4	27814.4
MSTRG.3661	1671.19	2.89395	0.353415	8.18854	2.64408e-16	8.34746e-14	Up	396.831	522.114	368.067	351.503	343.603	2425.24	1611.53	1551.12	5245.6	3896.33
MSTRG.22267	368.427	2.92267	0.357318	8.17947	2.85092e-16	8.92483e-14	Up	58.1474	137.275	62.1411	113.721	58.1482	438.786	661.232	411.622	857.149	886.043
MSTRG.25677	525.207	2.18359	0.268436	8.1345	4.13647e-16	1.27352e-13	Up	192.805	131.409	254.301	155.936	212.505	603.507	942.109	672.413	936.149	1150.93
MSTRG.3922	290.037	3.00069	0.369768	8.11506	4.85556e-16	1.48266e-13	Up	36.7247	63.3577	43.0208	112.86	65.5489	393.926	609.738	296.796	539.175	739.225
MSTRG.7442	9573.94	2.50892	0.30932	8.11107	5.01764e-16	1.51969e-13	Up	3160.36	3215.99	2558.3	2474.3	2897.89	7816.15	14167.9	11907.8	22701.6	24839
MSTRG.14596	552.848	2.48077	0.306332	8.09829	5.57361e-16	1.66107e-13	Up	238.71	166.607	151.051	138.706	144.842	465.422	977.219	816.432	1078.35	1351.14
MSTRG.9784	97.87	10.0432	1.24015	8.09834	5.57133e-16	1.66107e-13	Up	0	0	0	0	0	126.87	253.96	176.131	5.92499	415.814
MSTRG.24749	61.8168	9.38008	1.15957	8.08925	6.00315e-16	1.77488e-13	Up	0	0	0	0	0	93.9255	140.439	59.3592	25.675	298.77
MSTRG.14332	1823.63	2.49493	0.308688	8.08238	6.35164e-16	1.86313e-13	Up	271.355	645.31	819.307	639.252	372.148	3655.39	3665.45	2449.3	2609.96	3108.85
MSTRG.21063	10289.5	2.4076	0.298124	8.07585	6.70059e-16	1.95013e-13	Up	2614.59	3477.63	3759.06	2452.76	4013.28	14837.4	27755.3	20246.3	9544.18	14194.1
MSTRG.21237	200.094	5.44806	0.676479	8.05356	8.0419e-16	2.32236e-13	Up	0	9.38633	13.3842	10.3383	11.6296	97.4302	187.251	212.136	687.299	772.08
MSTRG.7129	122.109	24.3057	3.02646	8.03106	9.66302e-16	2.76905e-13	Up	0	0	0	0	0	644.161	0	0	1.975	574.953
MSTRG.8084	233.369	4.04224	0.50444	8.01332	1.11656e-15	3.17521e-13	Up	16.3221	26.9857	36.3287	28.4303	25.3737	508.179	443.552	125.53	186.637	936.352
MSTRG.11598	3447.06	3.44885	0.430913	8.00359	1.20844e-15	3.41044e-13	Up	270.334	761.466	375.715	650.452	834.162	2653.75	5608.18	3637.45	11916.2	7762.89
MSTRG.2400	67.9797	4.08664	0.513338	7.96093	1.70754e-15	4.74708e-13	Up	9.18117	4.69316	9.56018	7.75373	6.34344	58.8787	149.801	65.1978	134.3	234.088
MSTRG.8574	1714.26	2.45369	0.309245	7.93443	2.11466e-15	5.83538e-13	Up	368.267	470.49	597.511	527.254	682.977	5034.13	2000.08	2513.52	3060.26	1888.1
MSTRG.24443	54.9739	-24.0016	3.02682	-7.92964	2.19782e-15	5.97631e-13	Down	198.925	350.814	0	0	0	0	0	0	0	0
MSTRG.23924	51.312	-23.8849	3.02687	-7.89095	2.99902e-15	8.09584e-13	Down	0	220.579	292.541	0	0	0	0	0	0	0
MSTRG.18501	617.423	4.77354	0.607249	7.86093	3.81306e-15	1.02193e-12	Up	63.2481	50.4515	37.2847	21.5381	45.4613	242.524	2814.62	1875.17	250.825	773.106
MSTRG.20167	1474.71	2.26866	0.289106	7.84714	4.25634e-15	1.13258e-12	Up	579.434	469.316	413.956	448.855	622.714	1593.93	3715.77	1997.78	1686.65	3218.71
MSTRG.23454	544.495	4.20458	0.536512	7.83689	4.61831e-15	1.22018e-12	Up	36.7247	22.2925	94.6458	59.4453	66.6061	311.917	945.62	591.646	703.099	2612.96
MSTRG.25539	1577.01	2.7584	0.352197	7.83198	4.80263e-15	1.25995e-12	Up	227.489	360.2	591.775	570.33	280.168	4050.71	2532.58	1368.18	3074.08	2714.6
MSTRG.4025	3203.4	3.07291	0.393052	7.81806	5.36439e-15	1.39748e-12	Up	1029.31	441.157	638.62	641.837	651.26	2846.5	10491.9	5405.58	2620.82	7266.99
MSTRG.11995	604.581	2.49032	0.318772	7.81224	5.61804e-15	1.45339e-12	Up	168.321	151.355	190.248	174.028	229.421	1196.5	861.357	687.009	608.299	1779.27
HHLG32g0216	42.3844	8.83379	1.13498	7.78319	7.07198e-15	1.81691e-12	Up	0	0	0	0	0	23.8319	163.845	80.7674	42.4625	112.937
MSTRG.22960	272.589	2.87421	0.369832	7.77165	7.74674e-15	1.97664e-12	Up	55.087	70.3975	46.8449	107.691	46.5185	323.833	881.252	428.165	357.475	408.627
MSTRG.2951	104.234	8.42555	1.08619	7.75698	8.69753e-15	2.20414e-12	Up	1.02013	0	0.956018	0	1.05724	26.6356	462.277	287.065	65.1749	198.153
MSTRG.503	1170.03	2.08044	0.268268	7.75509	8.82825e-15	2.22215e-12	Up	488.642	414.172	454.108	502.27	377.435	1009.35	2396.82	1785.64	1661.96	2609.88
MSTRG.16879	32.8266	-23.2966	3.02725	-7.69562	1.40805e-14	3.5204e-12	Down	216.268	0	0	111.998	0	0	0	0	0	0
MSTRG.28971	251.672	2.44167	0.317624	7.68729	1.50283e-14	3.73234e-12	Up	33.6643	75.0906	78.3935	93.9063	109.953	412.151	507.92	332.801	358.462	514.377
MSTRG.12660	1821.54	3.06868	0.399779	7.67593	1.64221e-14	4.05146e-12	Up	320.321	445.851	270.553	454.886	448.27	1388.56	2414.37	1726.28	6004.98	4741.31
MSTRG.14784	3007.3	3.6385	0.474448	7.66891	1.73459e-14	4.25124e-12	Up	286.657	580.779	197.896	343.749	826.761	6379.93	2039.87	2581.64	8719.62	8116.08
MSTRG.13097	218.821	2.62315	0.342957	7.64862	2.03141e-14	4.91403e-12	Up	34.6844	87.9968	73.6134	47.3839	62.3771	318.225	326.52	224.786	483.875	528.751
MSTRG.2586	878.694	2.20053	0.2891	7.61167	2.7057e-14	6.50294e-12	Up	327.462	271.03	252.389	377.348	341.488	1124.3	1057.97	932.231	2120.16	1982.56
MSTRG.2440	603.008	4.19229	0.552283	7.59084	3.17843e-14	7.54178e-12	Up	77.5299	22.2925	32.5046	96.4909	83.5219	302.805	1817.51	1909.22	380.187	1308.02
MSTRG.27119	69.5898	9.5509	1.2586	7.58854	3.23533e-14	7.62821e-12	Up	0	0	0	0	0	39.2525	120.543	54.4937	23.7	457.909
MSTRG.8148	263.12	2.41102	0.319111	7.55541	4.17539e-14	9.78275e-12	Up	111.194	85.6502	82.2175	90.4602	46.5185	266.356	537.178	325.016	559.912	526.698
MSTRG.1485	627.57	2.79421	0.370667	7.53833	4.76038e-14	1.10836e-11	Up	165.261	90.3434	227.532	185.228	121.583	733.18	1277.99	1103.5	532.262	1838.82
MSTRG.8268	2165.04	2.55578	0.339431	7.52962	5.08877e-14	1.17711e-11	Up	655.944	759.119	609.939	557.407	564.566	2868.23	7106.19	3868.08	1740.96	2919.94
MSTRG.28803	353.101	2.96095	0.39328	7.52885	5.11884e-14	1.17711e-11	Up	43.8656	102.076	122.37	62.0299	71.8923	1103.27	437.7	347.397	772.224	468.176
MSTRG.27197	206.206	3.00566	0.399804	7.51783	5.56925e-14	1.27283e-11	Up	66.3085	37.5453	21.0324	37.0456	66.6061	258.646	228.213	298.742	448.325	599.594
MSTRG.24352	2158.6	3.37514	0.450174	7.49741	6.50911e-14	1.4696e-11	Up	601.877	464.623	375.715	172.305	283.34	869.162	5563.71	3976.09	4840.72	4438.43
MSTRG.29562	46.413	5.20193	0.693764	7.49812	6.47402e-14	1.4696e-11	Up	3.06039	3.51987	0	1.72305	4.22896	81.3087	66.7083	31.1392	171.825	100.617
MSTRG.10009	741.882	2.01817	0.270154	7.47044	7.99265e-14	1.79368e-11	Up	309.099	215.886	199.808	419.563	323.515	974.302	1443.01	875.791	1196.85	1461
MSTRG.14542	963.114	3.12028	0.418601	7.45407	9.0506e-14	2.01893e-11	Up	243.811	222.925	251.433	118.891	156.471	708.647	1192.56	1022.73	3282.45	2431.23
MSTRG.4747	68.5464	9.5291	1.28227	7.43144	1.07426e-13	2.3821e-11	Up	0	0	0	0	0	9.11218	195.444	372.698	41.475	66.7356
MSTRG.24384	1584.56	3.36975	0.453879	7.42434	1.13346e-13	2.49851e-11	Up	246.871	308.576	354.683	175.751	311.886	837.619	5993.22	3142.14	1307.45	3167.37
MSTRG.17954	3608.01	3.39421	0.457729	7.41532	1.21328e-13	2.65873e-11	Up	949.741	503.342	316.442	355.81	1008.61	3360.99	4046.97	3715.3	12639	9183.84
MSTRG.2598	31.8847	22.4332	3.02723	7.41045	1.25871e-13	2.74215e-11	Up	0	0	0	0	0	63.0843	0	0	255.762	0
MSTRG.19316	869.122	2.78165	0.375481	7.40822	1.28001e-13	2.77234e-11	Up	194.845	251.084	189.292	203.32	265.367	2395.8	621.441	747.342	2035.24	1787.49
MSTRG.23866	468.663	2.91092	0.393163	7.40384	1.323e-13	2.84888e-11	Up	105.073	50.4515	81.2615	193.843	118.411	500.469	1042.76	468.062	1111.92	1014.38
MSTRG.24609	396.74	4.6246	0.626711	7.37916	1.59287e-13	3.4103e-11	Up	18.3623	23.4658	20.0764	49.107	43.3468	196.963	445.893	341.559	360.437	2468.19
MSTRG.15047	673.028	2.6995	0.366137	7.37292	1.66926e-13	3.55342e-11	Up	153.02	267.51	181.643	162.828	133.212	675.703	771.242	816.432	1347.94	2220.76
MSTRG.14137	236.931	3.09182	0.41941	7.37182	1.68309e-13	3.5625e-11	Up	39.7851	58.6646	26.7685	71.5066	51.8047	168.225	640.166	267.603	423.637	621.154
MSTRG.2599	434.445	2.85003	0.386727	7.36962	1.71113e-13	3.6014e-11	Up	109.154	111.463	52.581	159.382	96.2088	420.562	1057.97	428.165	715.937	1193.03
MSTRG.12013	189.237	3.21257	0.437134	7.34918	1.99429e-13	4.1274e-11	Up	23.463	39.8919	24.8565	57.7222	38.0606	159.814	260.982	216.028	654.712	416.841
MSTRG.10709	537.185	2.56251	0.348653	7.34976	1.98559e-13	4.1274e-11	Up	147.919	145.488	207.456	149.905	126.869	1049.3	433.019	533.259	1459.52	1119.1
MSTRG.17263	3634.41	3.40376	0.463105	7.34987	1.98398e-13	4.1274e-11	Up	257.073	584.299	278.201	1133.77	883.852	4496.51	5836.39	3536.25	6262.72	13075
MSTRG.11630	192.516	2.8114	0.383195	7.33674	2.18853e-13	4.50439e-11	Up	78.55	41.0652	42.0648	46.5224	31.7172	301.403	313.646	145.965	408.825	515.404
MSTRG.2628	1204.73	3.33432	0.456114	7.31027	2.66608e-13	5.45711e-11	Up	450.898	114.983	101.338	130.952	288.626	1715.19	1946.24	1288.39	1930.56	4080.11
MSTRG.14280	2547.07	3.40425	0.46714	7.28744	3.15904e-13	6.4308e-11	Up	219.328	620.671	347.99	405.779	604.741	2608.19	2031.68	2136.93	8705.79	7789.58
MSTRG.13962	74.7024	9.65272	1.32715	7.27325	3.50944e-13	7.10529e-11	Up	0	0	0	0	0	2.80375	444.722	114.826	80.9749	103.697
MSTRG.6260	4826.5	2.15712	0.297003	7.26296	3.78707e-13	7.62594e-11	Up	1936.21	1762.28	1555.44	1468.9	2116.59	4072.44	7054.7	5942.73	10336.2	12019.6
MSTRG.15833	710.212	2.32697	0.321624	7.23507	4.65291e-13	9.31908e-11	Up	172.402	232.312	208.412	273.104	293.913	970.797	924.554	672.413	2095.47	1258.74
MSTRG.28880	1770.72	2.08534	0.289318	7.20778	5.68723e-13	1.13298e-10	Up	444.777	850.636	517.206	748.666	816.189	3834.12	1774.21	2263.43	2741.3	3716.66
MSTRG.13186	130.436	3.39873	0.472037	7.20013	6.01556e-13	1.19201e-10	Up	14.2818	18.7727	36.3287	18.092	25.3737	185.748	180.23	126.503	158.987	540.045
MSTRG.17824	149.108	2.75591	0.383572	7.18485	6.72794e-13	1.32612e-10	Up	55.087	39.8919	35.3727	29.2919	32.7744	201.87	229.383	130.396	262.675	474.336
MSTRG.20662	1357.5	2.14027	0.298984	7.15848	8.15756e-13	1.59107e-10	Up	355.005	814.264	413.956	553.1	374.263	2564.03	2368.73	1469.38	1758.74	2903.51
HHLG4g0334	27.3815	8.20291	1.14982	7.13409	9.74326e-13	1.89045e-10	Up	0	0	0	0	0	23.1309	110.01	72.9826	27.65	40.0414
MSTRG.27892	130.513	3.68968	0.518252	7.11947	1.08343e-12	2.09125e-10	Up	6.12078	16.4261	9.56018	31.8765	29.6027	108.645	414.294	150.831	212.312	325.464
MSTRG.18607	14145.6	2.37529	0.3357	7.07563	1.4877e-12	2.84212e-10	Up	3651.05	5579	4623.3	2998.11	6007.24	9799.1	23380.7	20476	32383.1	32558.8
MSTRG.26272	171.141	2.587	0.366253	7.06343	1.62447e-12	3.08758e-10	Up	34.6844	29.3323	35.3727	71.5066	72.9495	459.114	296.091	207.271	259.712	245.382
MSTRG.23983	687.075	2.17565	0.308079	7.06197	1.64164e-12	3.10437e-10	Up	183.623	348.467	282.025	286.027	144.842	677.105	1468.75	943.908	1240.3	1295.7
MSTRG.28547	290.165	3.17637	0.450267	7.0544	1.73341e-12	3.26135e-10	Up	38.7649	36.372	34.4166	116.306	62.3771	341.356	736.132	217.002	552.999	765.919
MSTRG.25397	232.1	4.04472	0.574754	7.03731	1.95988e-12	3.66892e-10	Up	44.8857	34.0254	21.0324	28.4303	4.22896	158.412	299.602	259.818	457.212	1013.35
MSTRG.20173	114.826	3.2807	0.467087	7.02374	2.16e-12	4.02332e-10	Up	44.8857	10.5596	15.2963	17.2305	19.0303	117.056	132.246	202.405	227.125	362.426
MSTRG.16697	228.569	2.06674	0.295064	7.00437	2.48102e-12	4.59829e-10	Up	57.1273	116.156	112.81	58.5838	96.2088	299.3	469.299	336.693	303.162	436.348
MSTRG.22930	895.587	2.74501	0.392573	6.99236	2.70304e-12	4.98497e-10	Up	246.871	190.073	259.081	176.613	289.684	517.291	2657.8	1382.78	1046.75	2188.93
MSTRG.2475	715.705	3.5412	0.506498	6.99153	2.71911e-12	4.9899e-10	Up	175.462	127.889	120.458	66.3375	76.1212	363.786	2208.4	1144.37	478.937	2395.29
MSTRG.24494	410.492	2.34928	0.336226	6.98721	2.80409e-12	5.12062e-10	Up	113.234	193.593	108.986	67.199	191.36	507.478	602.716	598.457	695.199	1026.7
MSTRG.18731	38.4619	8.69684	1.24587	6.98051	2.94113e-12	5.34468e-10	Up	0	0	0	0	0	130.374	104.159	120.665	8.88749	20.534
MSTRG.22354	626.388	2.78384	0.399876	6.96176	3.36048e-12	6.07709e-10	Up	99.9728	173.647	213.192	98.2139	209.333	353.973	1176.17	947.801	1376.57	1615
HHLG49g0248	61.7778	9.37845	1.34912	6.95152	3.61378e-12	6.50358e-10	Up	0	0	0	0	0	13.3178	392.058	7.78481	95.7874	108.83
MSTRG.27505	360.756	3.20841	0.462937	6.93056	4.19168e-12	7.50734e-10	Up	53.0468	37.5453	45.8888	143.013	71.8923	375.702	747.835	271.495	705.074	1156.07
MSTRG.5409	3112.35	2.6418	0.381513	6.92453	4.37416e-12	7.79668e-10	Up	481.501	1112.28	444.548	1315.55	944.115	2989.5	6848.72	3542.09	5262.38	8182.81
MSTRG.23024	1492.76	2.30883	0.333688	6.91914	4.54404e-12	8.06092e-10	Up	440.696	810.744	508.601	340.303	407.037	1429.21	3642.04	2214.78	1767.62	3366.55
MSTRG.12909	53.1882	4.62465	0.671536	6.88668	5.71112e-12	1.00357e-09	Up	5.10065	4.69316	3.82407	6.89221	0	27.3365	147.461	76.875	78.9999	180.699
MSTRG.18107	177.466	2.70949	0.393938	6.87794	6.07234e-12	1.06203e-09	Up	13.2617	62.1844	57.3611	55.1376	47.5758	485.048	250.449	273.441	247.862	282.343
MSTRG.13349	2020.29	2.30699	0.336188	6.86221	6.78021e-12	1.1803e-09	Up	535.568	709.841	543.974	834.818	771.785	1602.34	3640.87	2264.41	3375.27	5924.07
MSTRG.24351	8240.06	2.01852	0.294721	6.84894	7.43995e-12	1.28912e-09	Up	2935.93	3824.93	2549.7	2716.39	4284.99	9286.71	10147.9	9299.93	15785.2	21568.9
MSTRG.7217	567.024	3.89161	0.56948	6.83362	8.27969e-12	1.4214e-09	Up	36.7247	93.8633	118.546	55.9992	52.862	679.909	296.091	291.93	2375.92	1668.39
HHLG5g0386	22.5691	7.92379	1.16057	6.8275	8.64086e-12	1.4766e-09	Up	0	0	0	0	0	11.215	66.7083	49.6282	36.5375	61.6021
MSTRG.3082	385.1	2.32543	0.340784	6.82377	8.86813e-12	1.50851e-09	Up	62.2279	170.127	99.4258	103.383	206.162	702.339	431.849	781.4	557.937	736.145
MSTRG.3913	57.908	4.14272	0.608685	6.80602	1.00333e-11	1.69127e-09	Up	3.06039	0	3.82407	12.0614	11.6296	75.7012	70.2193	98.2832	145.162	159.139
MSTRG.14962	344.529	2.40997	0.354915	6.79028	1.11914e-11	1.87799e-09	Up	74.4695	131.409	73.6134	161.105	104.667	310.515	669.424	564.399	428.575	927.111
MSTRG.2589	128.858	3.1405	0.463314	6.77833	1.21571e-11	2.0309e-09	Up	11.2214	17.5994	23.9004	53.4146	24.3165	133.178	332.371	128.449	272.55	291.583
MSTRG.18781	265.645	3.61199	0.535022	6.7511	1.46729e-11	2.42938e-09	Up	28.5636	49.2782	11.4722	28.4303	83.5219	342.758	212.999	270.522	710.012	918.898
MSTRG.26347	1339.81	2.33446	0.346221	6.74268	1.55493e-11	2.56309e-09	Up	472.32	376.626	492.349	315.318	560.337	1434.12	1797.61	1149.23	3792.98	3007.21
MSTRG.14832	453.668	2.24554	0.333452	6.73423	1.64802e-11	2.70457e-09	Up	159.14	192.42	147.227	136.121	155.414	566.357	717.407	334.747	1254.12	873.723
MSTRG.22310	1123.83	2.95955	0.439994	6.72636	1.73965e-11	2.84243e-09	Up	120.375	283.936	206.5	320.488	348.889	1675.94	684.638	1155.07	2976.32	3466.14
MSTRG.28895	2120.06	2.8161	0.418891	6.72275	1.78322e-11	2.90088e-09	Up	406.012	628.884	372.847	610.822	617.428	1860.29	7772.11	4225.21	3294.3	1412.74
MSTRG.1046	48.9225	8.46079	1.26053	6.71207	1.91883e-11	3.10792e-09	Up	0	1.17329	0	0	0	5.60749	265.663	108.014	53.325	55.4419
MSTRG.22703	612.196	2.43764	0.364252	6.69218	2.19877e-11	3.54592e-09	Up	103.033	251.084	149.139	201.597	249.509	1053.51	468.129	781.4	1317.32	1547.24
MSTRG.2358	829.751	2.33987	0.350509	6.67564	2.46159e-11	3.91887e-09	Up	159.14	357.854	342.254	186.09	323.515	633.647	2114.77	1322.44	1384.47	1473.32
MSTRG.10729	308.459	2.10166	0.316018	6.65045	2.92191e-11	4.59283e-09	Up	138.738	85.6502	123.326	125.783	108.896	588.787	811.033	421.353	276.5	404.52
MSTRG.18753	126.476	3.12114	0.47038	6.63534	3.23747e-11	5.06746e-09	Up	27.5435	16.4261	32.5046	13.7844	40.1751	179.44	157.993	156.669	140.225	500.004
HHLG37g0761	14.9831	7.33378	1.10915	6.6121	3.78916e-11	5.85716e-09	Up	0	0	0	0	0	25.9347	40.9613	24.3275	23.7	34.9079
MSTRG.11321	266.452	2.40028	0.363676	6.60006	4.10989e-11	6.31674e-09	Up	73.4494	107.943	82.2175	63.7529	97.266	410.749	834.439	457.358	223.175	314.171
MSTRG.11582	277.054	2.57938	0.394127	6.54454	5.96803e-11	9.0216e-09	Up	124.456	35.1987	80.3055	97.3524	59.2054	336.45	256.3	476.82	762.349	542.098
MSTRG.21062	111.029	2.35926	0.36056	6.54331	6.01707e-11	9.03846e-09	Up	28.5636	56.318	42.0648	29.2919	25.3737	221.496	210.658	253.006	124.425	119.097
MSTRG.26850	332.662	2.53889	0.388167	6.54072	6.12254e-11	9.15996e-09	Up	60.1877	95.0366	61.1851	168.859	102.552	452.104	800.5	278.307	494.737	813.148
MSTRG.7761	554.971	2.48119	0.379543	6.53729	6.26417e-11	9.33437e-09	Up	154.04	205.326	98.4698	188.674	196.647	564.955	484.513	729.826	1703.44	1223.83
MSTRG.28675	25.235	8.08583	1.23858	6.52829	6.65258e-11	9.87365e-09	Up	0	0	0	0	0	5.60749	67.8787	30.1661	81.9624	66.7356
HHLG2g0869	50.9301	6.63587	1.02338	6.48424	8.91828e-11	1.308e-08	Up	5.10065	0	0	0	0	16.8225	189.592	100.229	118.5	79.056
MSTRG.25152	1740.76	2.68247	0.413943	6.48028	9.15536e-11	1.33751e-08	Up	266.254	552.62	580.303	695.251	251.623	5802.35	2147.54	1331.2	2893.37	2887.08
MSTRG.28872	622.469	9.25291	1.42839	6.47788	9.3022e-11	1.35365e-08	Up	10.2013	0	0	0	0	842.526	1737.93	595.538	323.9	2714.6
MSTRG.27477	103.365	4.24106	0.659729	6.42849	1.28882e-10	1.86094e-08	Up	0	25.8124	3.82407	17.2305	5.2862	217.29	134.587	126.503	257.737	245.382
MSTRG.13689	195.534	2.27255	0.353642	6.42613	1.30893e-10	1.88269e-08	Up	89.7715	96.2099	65.0092	41.3532	43.3468	252.337	527.815	233.544	279.462	326.491
MSTRG.16735	114.669	2.42762	0.378948	6.4062	1.49188e-10	2.13758e-08	Up	41.8253	23.4658	42.0648	46.5224	25.3737	199.066	117.032	142.073	335.75	173.513
MSTRG.14077	111.422	3.30078	0.516876	6.38603	1.70251e-10	2.43003e-08	Up	36.7247	19.9459	21.9884	10.3383	13.7441	138.085	297.262	58.3861	173.8	343.945
MSTRG.4755	11748.7	2.83011	0.445392	6.35421	2.09495e-10	2.96743e-08	Up	2541.14	2739.63	2695.97	1830.74	4677.23	22726.5	7031.29	8621.68	40080.6	24542.3
MSTRG.7499	263.023	-2.32279	0.365517	-6.35479	2.0871e-10	2.96743e-08	Down	356.025	248.738	491.393	418.702	677.691	98.1312	45.6425	57.413	120.475	116.017
MSTRG.11636	338.245	2.74592	0.432354	6.35109	2.13794e-10	3.00547e-08	Up	90.7916	35.1987	152.963	99.937	59.2054	469.628	669.424	619.865	242.925	942.512
MSTRG.10235	3937.52	2.23432	0.351976	6.34794	2.18214e-10	3.05606e-08	Up	1346.57	1729.43	1482.78	827.926	1515.02	4306.56	7240.78	4053.94	4412.15	12460
MSTRG.5902	76.512	7.19938	1.135	6.34309	2.25196e-10	3.14204e-08	Up	0	0	0	0	5.2862	22.43	392.058	83.6867	29.625	232.035
MSTRG.183	568.096	3.22338	0.508983	6.33298	2.40476e-10	3.34271e-08	Up	55.087	82.1304	113.766	134.398	163.872	772.432	413.124	416.487	882.824	2646.84
MSTRG.16936	380.732	3.87213	0.613008	6.3166	2.67382e-10	3.70289e-08	Up	8.16104	31.6789	12.4282	114.583	76.1212	449.3	459.936	434.003	1077.36	1143.75
MSTRG.27739	42.2256	5.60442	0.889995	6.29713	3.03198e-10	4.18335e-08	Up	0	4.69316	0	0	4.22896	23.8319	111.181	42.8165	119.487	116.017
MSTRG.21559	45.1248	7.76521	1.2391	6.2668	3.68551e-10	5.02916e-08	Up	0	0	1.91204	0	0	5.60749	91.2851	46.7089	186.637	119.097
MSTRG.6750	93.9984	2.30853	0.368577	6.26336	3.76764e-10	5.12248e-08	Up	22.4429	43.4118	24.8565	29.2919	38.0606	100.935	237.575	122.611	117.512	203.287
MSTRG.26746	201.697	2.47542	0.396611	6.24142	4.33603e-10	5.85254e-08	Up	64.2682	55.1447	62.1411	85.291	40.1751	304.207	229.383	151.804	623.112	401.44
MSTRG.12184	393.273	2.4601	0.394311	6.23898	4.40425e-10	5.92316e-08	Up	132.617	116.156	152.963	102.522	100.438	396.73	478.662	285.119	1082.3	1085.22
MSTRG.22957	1592.98	2.54546	0.408263	6.23486	4.52196e-10	6.03787e-08	Up	327.462	645.31	365.199	624.606	366.862	1171.97	4542.02	1698.06	1773.55	4414.82
HHLG46g0171	17.758	7.58168	1.216	6.23492	4.52008e-10	6.03787e-08	Up	0	0	0	0	0	55.374	62.027	33.0854	15.8	11.2937
MSTRG.13802	565.128	2.04282	0.329754	6.19496	5.82983e-10	7.70137e-08	Up	179.543	222.925	282.981	203.32	214.62	429.674	922.213	695.767	1572.1	928.138
MSTRG.29461	22.3215	7.90761	1.27747	6.19007	6.01371e-10	7.91621e-08	Up	0	0	0	0	0	13.3178	124.054	36.0047	11.85	37.988
MSTRG.5359	179.367	2.53982	0.410904	6.18105	6.36761e-10	8.35255e-08	Up	80.5903	52.7981	33.4606	39.6302	57.0909	355.375	102.988	253.979	375.25	442.508
MSTRG.24492	80.8434	2.13488	0.346263	6.16547	7.0274e-10	9.18567e-08	Up	14.2818	39.8919	27.7245	35.3226	32.7744	97.4302	110.01	136.234	140.225	174.539
MSTRG.4634	2001.57	4.36598	0.708832	6.1594	7.30221e-10	9.47837e-08	Up	423.354	73.9173	71.7013	57.7222	299.199	2468.7	8648.68	3987.77	231.075	3753.62
MSTRG.23351	1656.06	4.05829	0.663207	6.11918	9.40553e-10	1.2124e-07	Up	51.0065	339.081	76.4814	111.137	360.519	1624.77	837.95	868.006	7913.82	4377.86
MSTRG.9259	1080.04	2.20433	0.361097	6.10453	1.03107e-09	1.31994e-07	Up	475.381	328.521	332.694	267.935	521.219	970.797	1720.37	946.827	2134.97	3101.67
MSTRG.3929	262.78	2.6432	0.433206	6.10149	1.05087e-09	1.34069e-07	Up	55.087	39.8919	40.1527	118.029	108.896	299.3	475.151	224.786	502.637	763.866
MSTRG.5371	311.197	3.28032	0.538279	6.0941	1.10058e-09	1.39931e-07	Up	32.6442	138.448	26.7685	50.83	42.2896	135.982	716.237	629.596	404.875	934.298
MSTRG.13089	126.896	3.25469	0.535031	6.08318	1.17825e-09	1.49124e-07	Up	16.3221	11.7329	12.4282	41.3532	38.0606	93.9255	390.887	101.203	222.187	340.865
MSTRG.27356	13.452	7.18344	1.18094	6.08282	1.18088e-09	1.49124e-07	Up	0	0	0	0	0	39.2525	21.0658	22.3813	39.5	12.3204
MSTRG.8954	5633.7	2.2528	0.372512	6.04758	1.4704e-09	1.83815e-07	Up	1294.55	2456.87	1876.66	1716.16	2426.36	3704.45	9132.02	5668.31	15574.8	12486.7
MSTRG.12203	189.641	2.81941	0.466647	6.04184	1.52368e-09	1.89838e-07	Up	20.4026	37.5453	34.4166	68.9221	74.0068	652.572	142.779	259.818	253.787	352.159
MSTRG.20628	1241.77	2.06569	0.341966	6.04064	1.53509e-09	1.90622e-07	Up	471.3	275.723	321.222	544.484	781.3	1601.64	1335.34	1616.32	2377.9	3092.42
MSTRG.1516	192.3	2.46861	0.409165	6.0333	1.60645e-09	1.98578e-07	Up	39.7851	73.9173	102.294	36.1841	42.2896	432.478	367.481	140.127	270.575	417.868
MSTRG.18834	557.004	2.25496	0.374722	6.01769	1.76921e-09	2.1752e-07	Up	187.704	205.326	184.511	170.582	216.734	466.824	681.127	482.658	1701.46	1273.11
MSTRG.28884	158.695	2.82247	0.469321	6.01394	1.81068e-09	2.21885e-07	Up	34.6844	66.8776	34.4166	39.6302	21.1448	112.15	361.629	176.131	542.137	198.153
MSTRG.7747	2508.44	2.20198	0.366688	6.00504	1.9128e-09	2.33632e-07	Up	895.674	587.819	476.097	1158.75	1359.61	1876.41	5876.18	3575.17	4102.07	5176.63
MSTRG.11832	360.582	3.09419	0.516099	5.99534	2.03057e-09	2.47205e-07	Up	67.3286	83.3037	66.9212	61.1683	99.3805	213.786	328.86	253.006	858.137	1573.93
MSTRG.12105	2570.46	2.72935	0.45583	5.98765	2.12899e-09	2.57963e-07	Up	544.749	799.011	281.069	430.763	1313.09	2249.31	3279.24	2622.51	7786.43	6398.4
MSTRG.3265	14.1137	7.24827	1.21464	5.96741	2.41051e-09	2.90611e-07	Up	0	0	0	0	0	25.2337	35.1096	16.5427	10.8625	53.3885
MSTRG.5353	272.89	2.83855	0.477756	5.94143	2.82543e-09	3.39534e-07	Up	105.073	78.6105	59.2731	32.738	59.2054	210.281	918.702	447.627	177.75	639.635
MSTRG.12799	851.401	2.47807	0.418747	5.91783	3.26216e-09	3.90756e-07	Up	241.771	267.51	236.136	221.412	328.802	679.208	1783.57	746.369	3156.05	853.189
MSTRG.9159	201.445	2.27057	0.384841	5.90002	3.63466e-09	4.33981e-07	Up	53.0468	61.0111	52.581	105.968	72.9495	407.945	216.509	163.481	567.812	313.144
MSTRG.14575	275.109	2.87216	0.487537	5.89117	3.8348e-09	4.56414e-07	Up	92.8318	26.9857	21.9884	72.3682	116.296	370.095	348.756	454.438	313.037	934.298
MSTRG.5614	1329.21	2.19889	0.374484	5.8718	4.31101e-09	5.0939e-07	Up	302.979	567.873	313.574	485.901	707.293	2290.66	1962.63	840.759	2274.21	3546.23
MSTRG.11831	2670.67	2.48092	0.422542	5.87141	4.32092e-09	5.0939e-07	Up	838.547	698.108	647.224	675.436	1197.85	1155.14	4855.66	2839.51	7440.81	6358.36
MSTRG.8093	91.2453	4.56313	0.778034	5.86495	4.49274e-09	5.27975e-07	Up	6.12078	7.03975	0.956018	0	23.2593	90.4208	142.779	82.7136	294.275	264.889
MSTRG.17586	144.207	2.51148	0.428613	5.85957	4.64076e-09	5.4195e-07	Up	60.1877	42.2385	17.2083	38.7687	57.0909	278.973	98.307	192.674	296.25	360.372
MSTRG.19364	1407.25	2.59989	0.443698	5.8596	4.63976e-09	5.4195e-07	Up	643.702	438.811	377.627	285.165	247.394	1404.68	1632.6	943.908	3026.68	5071.91
MSTRG.14833	206.31	3.20191	0.546874	5.85493	4.77222e-09	5.55561e-07	Up	26.5234	79.7838	12.4282	49.9685	33.8317	383.412	781.775	229.652	113.562	352.159
MSTRG.7582	3400.1	2.88584	0.493699	5.84534	5.05549e-09	5.84882e-07	Up	1467.97	525.634	726.573	569.469	762.27	3901.41	1688.77	2886.22	10777.6	10695.1
MSTRG.20402	54.6653	3.84281	0.657919	5.84086	5.19323e-09	5.97109e-07	Up	0	5.86646	15.2963	6.89221	7.40068	80.6077	118.202	53.5206	203.425	55.4419
MSTRG.25273	997.148	2.05948	0.353845	5.82029	5.87471e-09	6.7132e-07	Up	235.65	178.34	622.368	438.517	453.556	1122.2	1908.79	1171.61	1847.61	1992.83
MSTRG.1894	749.247	2.64391	0.455787	5.80076	6.60146e-09	7.49769e-07	Up	120.375	282.763	161.567	225.72	243.165	604.208	571.117	848.544	2930.9	1504.12
MSTRG.12606	593.13	2.0285	0.351086	5.77778	7.56917e-09	8.54468e-07	Up	226.469	387.186	108.986	163.69	282.283	914.723	939.768	569.264	1186.97	1151.96
MSTRG.17041	2049.9	2.17644	0.376861	5.77517	7.68746e-09	8.65199e-07	Up	547.81	553.793	516.25	889.956	1205.25	1823.14	3063.9	1886.84	5362.12	4649.93
MSTRG.7890	1254.23	2.09093	0.362174	5.77326	7.77529e-09	8.72448e-07	Up	406.012	599.552	634.796	335.995	408.094	1678.74	3687.68	2362.69	916.399	1512.33
MSTRG.17523	130.775	3.52924	0.611986	5.76686	8.0764e-09	9.03514e-07	Up	13.2617	16.4261	13.3842	13.7844	47.5758	201.169	42.1316	145.965	261.687	552.365
MSTRG.26855	13.5175	7.18464	1.24693	5.76184	8.32004e-09	9.27984e-07	Up	0	0	0	0	0	23.8319	55.0051	14.5965	8.88749	32.8544
MSTRG.21869	106.906	2.50218	0.436252	5.73562	9.71554e-09	1.0804e-06	Up	36.7247	21.1192	47.8009	9.47678	45.4613	218.692	202.466	212.136	102.7	172.486
MSTRG.29450	627.662	2.89886	0.505508	5.73455	9.77717e-09	1.08402e-06	Up	218.308	217.059	107.074	49.9685	150.128	264.954	812.203	894.28	1862.42	1700.22
MSTRG.24985	17.8007	6.41278	1.1203	5.72418	1.03935e-08	1.14893e-06	Up	0	0	0	1.72305	0	25.2337	65.538	29.193	29.625	26.6942
MSTRG.8955	414.681	2.34341	0.410656	5.70651	1.15318e-08	1.27099e-06	Up	131.597	104.423	135.755	174.89	135.327	204.674	1162.13	647.112	461.162	989.74
MSTRG.18829	900.111	2.14986	0.377324	5.69766	1.21464e-08	1.33477e-06	Up	307.059	279.243	276.289	444.547	347.832	1314.96	892.955	572.184	2397.65	2168.39
HHLG28g0218	23.3031	6.80552	1.19694	5.68575	1.30239e-08	1.427e-06	Up	0	0	0	1.72305	0	10.5141	77.2412	38.924	79.9874	24.6408
MSTRG.4175	18352.9	2.91553	0.513518	5.67755	1.36638e-08	1.49272e-06	Up	2797.2	4757.7	3340.33	2811.16	7771.77	16584.2	12849	11684	72124	48809.4
MSTRG.7882	152.924	2.52279	0.445793	5.6591	1.5217e-08	1.65271e-06	Up	44.8857	66.8776	28.6805	37.9071	48.633	85.5143	170.867	237.437	377.225	431.215
MSTRG.12224	212.666	2.12166	0.375197	5.65478	1.56042e-08	1.68984e-06	Up	40.8052	72.744	60.2291	149.044	74.0068	453.506	298.432	344.478	208.362	425.054
MSTRG.23132	1430.59	3.05429	0.540774	5.64799	1.62334e-08	1.74782e-06	Up	233.61	227.618	220.84	289.473	565.623	1326.17	1046.27	1035.38	1927.6	7433.32
MSTRG.24747	57.7541	5.40245	0.957251	5.64371	1.66421e-08	1.78152e-06	Up	9.18117	0	0	0	4.22896	42.0562	222.361	69.0902	35.55	195.073
MSTRG.9923	300.615	2.50408	0.444612	5.63205	1.78085e-08	1.90091e-06	Up	104.053	70.3975	80.3055	136.983	58.1482	140.187	653.039	343.505	552.999	866.536
MSTRG.7881	701.01	2.25029	0.399608	5.63124	1.7892e-08	1.90438e-06	Up	337.663	213.539	202.676	160.244	303.428	369.394	1054.46	928.339	1502.97	1937.39
MSTRG.25780	6221.1	2.79972	0.498194	5.61974	1.91242e-08	2.02973e-06	Up	829.366	2155.34	1304.01	887.372	2636.76	2786.22	9616.53	5566.14	19944.5	16484.7
MSTRG.5643	336.357	2.4919	0.443621	5.61719	1.94093e-08	2.05414e-06	Up	113.234	118.502	93.6897	91.3217	90.9226	117.056	660.061	841.733	391.05	846.002
MSTRG.21229	498.52	2.98923	0.53325	5.60567	2.07446e-08	2.18304e-06	Up	19.3825	185.38	152.007	120.614	80.3502	632.245	498.557	438.869	1823.91	1033.89
MSTRG.5354	342.262	2.4387	0.436959	5.58109	2.39021e-08	2.50823e-06	Up	116.295	55.1447	144.359	44.7993	172.33	335.749	740.814	634.462	310.075	868.589
HHLG26g0846	36.0294	6.12842	1.10402	5.55102	2.84003e-08	2.93888e-06	Up	5.10065	0	0	0	0	24.5328	181.4	52.5475	20.7375	75.9759
MSTRG.3932	265.947	2.65095	0.477635	5.55015	2.85419e-08	2.94535e-06	Up	27.5435	51.6248	37.2847	174.028	74.0068	352.571	548.881	269.549	472.025	651.955
HHLG20g0372	10.3225	6.79756	1.22854	5.53304	3.14729e-08	3.22992e-06	Up	0	0	0	0	0	18.9253	21.0658	7.78481	25.675	29.7743
MSTRG.3948	172.262	2.29955	0.417656	5.50584	3.67408e-08	3.76018e-06	Up	44.8857	104.423	49.7129	48.2454	44.4041	522.899	177.889	359.074	169.85	201.233
MSTRG.22213	2928.76	2.58311	0.469349	5.5036	3.72103e-08	3.7978e-06	Up	209.127	1027.8	855.636	802.08	1294.06	3351.88	2877.82	2783.07	6395.04	9691.04
MSTRG.7829	7649.2	2.1465	0.390252	5.50028	3.79181e-08	3.85946e-06	Up	2536.04	3111.57	1607.07	2761.19	4077.77	10244.2	6334.95	6817.55	14577.5	24424.2
MSTRG.10149	426.21	2.15877	0.393914	5.48031	4.24582e-08	4.29808e-06	Up	187.704	98.5564	140.535	174.89	177.616	184.346	880.082	705.498	896.649	816.228
MSTRG.17517	3691.17	5.81883	1.06345	5.47163	4.45903e-08	4.50169e-06	Up	70.389	193.593	54.493	127.506	196.647	801.171	369.822	500.174	19032.1	15565.8
MSTRG.17510	82.2165	2.87879	0.526559	5.46718	4.57255e-08	4.60382e-06	Up	12.2416	39.8919	22.9444	17.2305	6.34344	98.8321	252.789	61.3054	167.875	142.712
MSTRG.11796	53.7573	4.03539	0.740637	5.44854	5.07836e-08	5.0856e-06	Up	9.18117	4.69316	7.64814	0	9.51516	24.5328	155.653	37.9509	183.675	104.724
MSTRG.18758	22.1315	3.77673	0.695829	5.42767	5.70949e-08	5.68705e-06	Up	2.04026	4.69316	5.73611	2.58458	0	27.3365	24.5768	35.0316	72.0874	47.2283
MSTRG.486	103.955	4.33365	0.799536	5.4202	5.95322e-08	5.91401e-06	Up	4.08052	0	26.7685	9.47678	8.45792	41.3553	517.282	232.571	93.8124	105.75
MSTRG.9008	5611.16	2.11403	0.393145	5.37723	7.564e-08	7.45454e-06	Up	1146.63	2784.22	1416.82	1288.84	3893.81	10557.5	5862.14	5732.54	13764.7	9664.34
MSTRG.24399	562.932	2.27952	0.424646	5.36805	7.95921e-08	7.80275e-06	Up	171.382	325.002	201.72	161.967	101.495	324.534	1737.93	843.679	781.112	980.5
MSTRG.27476	59.6525	3.23863	0.605109	5.35214	8.69197e-08	8.45436e-06	Up	6.12078	3.51987	5.73611	28.4303	12.6869	50.4675	168.526	62.2785	102.7	156.059
MSTRG.21558	225.246	8.18061	1.52903	5.3502	8.78587e-08	8.52344e-06	Up	0	0	7.64814	0	0	35.7478	301.943	177.104	1163.27	566.739
MSTRG.20838	464.472	-2.16576	0.405007	-5.34747	8.91945e-08	8.60819e-06	Down	1416.96	267.51	799.231	813.28	501.132	138.785	134.587	250.087	187.625	135.525
MSTRG.10562	103.03	3.66425	0.686459	5.33791	9.40255e-08	9.05099e-06	Up	16.3221	17.5994	17.2083	4.30763	20.0876	27.3365	92.4554	80.7674	501.65	252.569
MSTRG.8304	241.488	2.06894	0.38902	5.31832	1.04728e-07	1.00552e-05	Up	70.389	75.0906	145.315	67.199	106.781	342.057	161.504	325.989	635.949	484.603
MSTRG.20573	5982.5	2.06953	0.391229	5.28982	1.22438e-07	1.16357e-05	Up	1596.5	3540.99	1471.31	2221.87	2680.1	5714.04	6418.04	5514.56	18336.9	12330.7
MSTRG.3813	116.754	2.43407	0.460882	5.28134	1.28245e-07	1.2095e-05	Up	38.7649	42.2385	42.0648	27.5688	31.7172	58.8787	128.735	159.589	300.2	337.785
MSTRG.17333	11.7959	-6.4748	1.22589	-5.28172	1.27978e-07	1.2095e-05	Down	14.2818	9.38633	36.3287	14.6459	42.2896	0	0	0	0	1.0267
HHLG28g0501	8.95957	6.5915	1.24794	5.2819	1.27853e-07	1.2095e-05	Up	0	0	0	0	0	8.41124	15.2142	20.4351	16.7875	28.7476
MSTRG.6179	221.978	2.4586	0.466332	5.27222	1.34785e-07	1.26796e-05	Up	63.2481	122.022	74.5694	27.5688	54.9765	473.833	255.13	136.234	649.774	362.426
MSTRG.2289	73.764	2.48249	0.471532	5.26473	1.40392e-07	1.30751e-05	Up	22.4429	45.7583	23.9004	12.0614	8.45792	175.935	141.609	125.53	72.0874	109.857
MSTRG.2480	5526.89	2.86509	0.545202	5.2551	1.47945e-07	1.37441e-05	Up	544.749	736.827	675.905	3261.74	1450.53	20034.9	13427.1	5173.01	5170.55	4793.67
MSTRG.6848	376.544	2.92288	0.556382	5.25337	1.4934e-07	1.38392e-05	Up	87.7312	85.6502	45.8888	99.937	119.468	187.851	504.409	371.725	1941.42	321.358
MSTRG.12967	69.9659	3.04908	0.582237	5.23685	1.63344e-07	1.50239e-05	Up	4.08052	4.69316	17.2083	31.8765	16.9158	59.5796	134.587	77.8481	137.262	215.607
MSTRG.23059	302.881	2.04315	0.390918	5.22656	1.72692e-07	1.57679e-05	Up	75.4896	167.781	102.294	155.936	89.8654	440.889	538.348	173.212	528.312	756.679
MSTRG.20941	2150.93	2.14535	0.412212	5.20447	1.94547e-07	1.76337e-05	Up	401.931	587.819	527.722	1101.03	1346.92	3789.97	2263.4	2383.12	2442.09	6665.35
MSTRG.324	10.9629	6.88163	1.32441	5.196	2.03625e-07	1.84118e-05	Up	0	0	0	0	0	14.7197	51.4941	15.5696	22.7125	5.13351
MSTRG.6482	780.346	2.52731	0.486818	5.19149	2.08618e-07	1.87417e-05	Up	137.718	412.998	254.301	186.09	162.815	1056.31	479.832	520.609	2422.34	2170.45
MSTRG.8533	1181.41	2.17298	0.418556	5.19161	2.08482e-07	1.87417e-05	Up	556.991	276.897	405.351	481.593	422.896	661.684	3430.21	1661.08	1020.09	2897.35
MSTRG.14426	95.5729	3.03623	0.584968	5.19043	2.09812e-07	1.87887e-05	Up	40.8052	11.7329	21.0324	21.5381	8.45792	58.8787	287.899	98.2832	322.912	84.1895
MSTRG.6235	398.966	2.01771	0.388776	5.18991	2.10395e-07	1.87958e-05	Up	144.858	149.008	171.127	155.936	169.158	489.254	275.026	344.478	1023.05	1067.77
MSTRG.23081	478.409	2.28591	0.441853	5.17346	2.29793e-07	2.02855e-05	Up	99.9728	346.121	70.7453	140.429	157.529	557.946	745.495	433.03	885.787	1347.03
MSTRG.6572	45.6101	2.38883	0.462283	5.16746	2.37299e-07	2.08986e-05	Up	8.16104	15.2528	12.4282	23.2612	13.7441	51.8693	58.5161	134.288	52.3375	86.2429
MSTRG.21131	835.806	2.31877	0.449004	5.16425	2.414e-07	2.12096e-05	Up	231.57	315.615	180.687	125.783	542.364	675.703	1193.73	798.916	2430.24	1863.46
MSTRG.12057	127.269	2.13825	0.415305	5.14863	2.6239e-07	2.29456e-05	Up	26.5234	71.5708	46.8449	56.8607	33.8317	175.935	265.663	104.122	347.6	143.738
MSTRG.5875	4294.79	2.03601	0.396131	5.13975	2.75103e-07	2.39449e-05	Up	1879.08	1723.56	1812.61	1287.98	1715.9	1928.28	11607.2	7775.08	4256.12	8962.08
HHLG21g0418	30.3751	3.29225	0.641364	5.1332	2.84861e-07	2.47364e-05	Up	9.18117	4.69316	3.82407	5.16915	5.2862	49.0656	21.0658	54.4937	24.6875	126.284
MSTRG.21960	39.0233	-5.50922	1.07654	-5.11753	3.0957e-07	2.67573e-05	Down	247.892	23.4658	51.625	17.2305	41.2323	0	4.68129	0	0	4.10681
MSTRG.26621	8.01249	-6.50746	1.27253	-5.11379	3.15765e-07	2.71041e-05	Down	13.2617	10.5596	29.6365	12.9229	13.7441	0	0	0	0	0
MSTRG.24758	49.0563	5.43802	1.06464	5.10783	3.25873e-07	2.79075e-05	Up	8.16104	0	2.86805	0	0	4.20562	189.592	68.1171	130.35	87.2696
MSTRG.27594	45.355	2.34181	0.461216	5.07748	3.82478e-07	3.23829e-05	Up	26.5234	10.5596	11.4722	16.369	9.51516	35.0468	73.7303	83.6867	82.9499	103.697
MSTRG.6911	2875.39	2.51952	0.496396	5.07562	3.86241e-07	3.25748e-05	Up	807.943	617.151	544.93	690.944	1609.12	1635.99	2447.14	2879.41	11106.4	6414.83
MSTRG.3617	489.845	7.03407	1.39033	5.05928	4.20834e-07	3.53093e-05	Up	0	25.8124	11.4722	0	0	607.712	1435.98	571.21	392.037	1854.22
MSTRG.16733	191.18	2.95772	0.584871	5.05705	4.25794e-07	3.56452e-05	Up	55.087	66.8776	47.8009	4.30763	44.4041	311.216	311.306	107.041	680.387	283.37
MSTRG.18636	25.0358	8.07474	1.59724	5.05542	4.29446e-07	3.58703e-05	Up	0	0	0	0	0	0	159.164	29.193	15.8	46.2016
MSTRG.23408	59.6407	4.69994	0.930435	5.05133	4.38735e-07	3.65642e-05	Up	0	8.21304	1.91204	7.75373	4.22896	37.8506	355.778	141.1	11.85	27.7209
MSTRG.18649	158.589	2.70524	0.536477	5.0426	4.59247e-07	3.81882e-05	Up	79.5701	21.1192	22.9444	25.8458	61.3199	156.309	548.881	281.226	88.8749	299.797
MSTRG.9307	102.335	-10.1809	2.02328	-5.03188	4.85703e-07	4.02086e-05	Down	300.938	0	296.365	242.089	183.96	0	0	0	0	0
MSTRG.624	27.2055	5.65101	1.12596	5.01883	5.19862e-07	4.26573e-05	Up	2.04026	3.51987	0	0	0	4.20562	119.373	19.462	45.425	78.0293
MSTRG.6910	879.232	2.56435	0.514603	4.98316	6.25531e-07	5.03302e-05	Up	321.341	275.723	142.447	132.675	399.637	553.039	820.395	663.655	3393.05	2090.36
MSTRG.14376	205.914	3.23138	0.650546	4.96718	6.79326e-07	5.40746e-05	Up	18.3623	65.7043	32.5046	11.1998	70.8351	287.384	79.5819	113.853	780.124	599.594
MSTRG.7864	20.1517	7.76195	1.56435	4.96177	6.98554e-07	5.53686e-05	Up	0	0	0	0	0	10.5141	84.2632	37.9509	0	68.789
MSTRG.9437	91.9882	2.01868	0.407216	4.95726	7.1496e-07	5.65487e-05	Up	27.5435	28.159	39.1967	46.5224	40.1751	119.86	243.427	177.104	58.2624	139.631
MSTRG.26949	100.299	-2.26478	0.457032	-4.95541	7.2178e-07	5.69671e-05	Down	270.334	96.2099	150.095	145.598	167.044	21.729	70.2193	34.0585	13.825	33.8811
MSTRG.12696	69.4911	2.40676	0.486274	4.94938	7.44488e-07	5.85114e-05	Up	15.302	12.9062	17.2083	22.3997	42.2896	48.3646	126.395	129.422	198.487	82.1361
MSTRG.23842	124.239	3.70469	0.750334	4.93738	7.91775e-07	6.19664e-05	Up	42.8455	0	21.9884	18.092	5.2862	99.533	363.97	110.934	448.325	131.418
MSTRG.14594	342.054	2.37897	0.481959	4.93605	7.97227e-07	6.2132e-05	Up	157.1	58.6646	153.919	85.291	96.2088	104.44	692.83	535.206	623.112	913.764
MSTRG.22982	1168.66	2.37033	0.480206	4.93607	7.97108e-07	6.2132e-05	Up	389.69	293.323	712.233	123.198	375.32	855.143	3506.28	1168.69	1323.25	2939.45
MSTRG.10680	186.865	2.23585	0.453092	4.93464	8.02973e-07	6.24491e-05	Up	48.9662	124.369	75.5254	34.461	44.4041	138.085	287.899	294.85	238.975	581.113
MSTRG.28845	105.842	-10.2294	2.07552	-4.92862	8.28133e-07	6.41381e-05	Down	132.617	303.882	0	338.58	283.34	0	0	0	0	0
MSTRG.14437	417.082	2.60522	0.531027	4.90601	9.29478e-07	7.13935e-05	Up	57.1273	186.553	108.986	86.1526	150.128	200.468	1088.4	579.968	1461.5	251.542
MSTRG.13978	97.7531	2.16339	0.441297	4.90234	9.4704e-07	7.24437e-05	Up	59.1675	23.4658	40.1527	25.8458	29.6027	95.3274	140.439	85.6329	298.225	179.673
MSTRG.2498	483.922	2.24829	0.459352	4.89448	9.85642e-07	7.50882e-05	Up	80.5903	217.059	144.359	119.752	280.168	901.405	217.68	578.995	1049.71	1249.5
MSTRG.5698	472.962	2.44054	0.499512	4.88585	1.02983e-06	7.82942e-05	Up	96.9124	157.221	151.051	126.644	204.047	714.956	245.768	304.581	763.337	1965.11
MSTRG.25456	192.32	2.02947	0.416779	4.8694	1.11935e-06	8.47547e-05	Up	139.758	52.7981	79.3495	43.9378	62.3771	241.823	581.65	245.222	183.675	292.61
MSTRG.17870	112.241	2.99046	0.614359	4.86762	1.12951e-06	8.53505e-05	Up	0	37.5453	18.1643	37.0456	32.7744	271.263	169.697	152.777	163.925	239.221
MSTRG.19228	119.721	3.01573	0.619789	4.86574	1.14028e-06	8.59893e-05	Up	19.3825	24.6391	24.8565	11.1998	51.8047	23.8319	299.602	125.53	379.2	237.168
MSTRG.7350	43.5236	2.37511	0.488679	4.86026	1.1723e-06	8.80479e-05	Up	6.12078	12.9062	9.56018	21.5381	20.0876	92.5237	83.0928	97.3101	33.575	58.522
MSTRG.2398	731.125	-3.56807	0.7346	-4.85716	1.19081e-06	8.9258e-05	Down	4732.38	373.107	678.773	231.75	726.324	32.2431	169.697	207.271	37.525	122.177
MSTRG.11760	15.3361	7.3696	1.51924	4.85085	1.22931e-06	9.18923e-05	Up	0	0	0	0	0	39.2525	50.3238	27.2468	36.5375	0
MSTRG.3143	65.1163	9.45576	1.96061	4.82288	1.41501e-06	0.000104798	Up	0	0	0	0	0	121.963	0	209.217	163.925	156.059
MSTRG.13164	37.7903	2.28341	0.474984	4.80735	1.52942e-06	0.000112156	Up	11.2214	10.5596	11.4722	18.092	12.6869	35.0468	70.2193	64.2247	35.55	108.83
MSTRG.26679	16.9298	4.72381	0.982997	4.80552	1.54351e-06	0.000112967	Up	2.04026	2.34658	1.91204	0	0	9.81312	50.3238	9.73101	59.2499	33.8811
MSTRG.13926	8089.09	3.17486	0.66472	4.77624	1.786e-06	0.000129192	Up	613.098	1915.98	1149.13	1313.83	3072.34	7431.33	1947.42	2884.27	31619.7	28943.7
MSTRG.13138	143.131	3.54968	0.745163	4.76362	1.90146e-06	0.000136484	Up	32.6442	4.69316	19.1204	13.7844	42.2896	51.8693	690.49	431.084	63.1999	82.1361
MSTRG.22986	2900.61	2.05392	0.43147	4.7603	1.93309e-06	0.000138432	Up	1021.15	1212.01	828.867	842.572	1725.41	3509.59	2010.61	1963.72	7839.76	8052.42
MSTRG.12569	811.504	2.15862	0.453561	4.75928	1.94285e-06	0.000138653	Up	410.092	222.925	99.4258	384.24	367.919	582.478	2221.27	816.432	983.549	2026.71
HHLG32g0892	58.9339	3.49481	0.735372	4.75244	2.00978e-06	0.000143156	Up	0	17.5994	8.60416	5.16915	16.9158	44.86	149.801	72.0095	45.425	228.954
HHLG36g0353	10.1817	6.77345	1.42585	4.75047	2.02943e-06	0.000144279	Up	0	0	0	0	0	5.60749	58.5161	20.4351	4.9375	12.3204
MSTRG.325	65.3595	2.72102	0.573362	4.74573	2.07757e-06	0.00014714	Up	12.2416	11.7329	8.60416	15.5075	38.0606	75.7012	93.6257	54.4937	266.625	77.0026
MSTRG.536	258.157	2.91686	0.614603	4.74592	2.07556e-06	0.00014714	Up	18.3623	78.6105	47.8009	56.8607	100.438	435.983	94.796	112.88	923.312	712.531
MSTRG.15024	142.456	3.30476	0.699018	4.72772	2.27054e-06	0.000159293	Up	24.4831	46.9316	12.4282	0	47.5758	165.421	184.911	301.661	194.537	446.615
MSTRG.21320	55.7254	3.0636	0.649362	4.71787	2.38328e-06	0.000166262	Up	9.18117	8.21304	21.0324	20.6766	0	86.2152	120.543	155.696	47.4	88.2963
MSTRG.23039	330.925	2.39596	0.508269	4.71397	2.42935e-06	0.000168844	Up	68.3487	95.0366	194.072	100.799	69.7778	83.4115	505.579	643.22	783.087	765.919
HHLG10g0016	7.93408	6.41395	1.36252	4.70742	2.50869e-06	0.000173881	Up	0	0	0	0	0	7.00937	32.769	11.6772	21.725	6.16021
MSTRG.2723	43.2759	3.39365	0.722708	4.69574	2.65643e-06	0.000183259	Up	5.10065	0	12.4282	11.1998	8.45792	34.3459	177.889	82.7136	25.675	74.9492
MSTRG.29351	27.7812	2.9395	0.626235	4.69393	2.68004e-06	0.000184546	Up	12.2416	4.69316	3.82407	6.89221	4.22896	29.4393	104.159	31.1392	23.7	57.4953
MSTRG.7033	13.6675	7.20343	1.53902	4.68052	2.86152e-06	0.000194882	Up	0	0	0	0	0	34.3459	39.7909	38.924	0	23.6141
MSTRG.26856	77.7596	3.94724	0.844533	4.67387	2.95573e-06	0.00020093	Up	7.14091	0	18.1643	21.5381	0	53.9721	311.306	110.934	131.337	123.204
HHLG25g0428	29.7235	3.73144	0.801163	4.65752	3.20034e-06	0.000216374	Up	4.08052	4.69316	3.82407	0	8.45792	38.5515	7.02193	59.3592	82.9499	88.2963
MSTRG.6234	122.748	2.31797	0.49792	4.65531	3.23496e-06	0.000218319	Up	56.1072	43.4118	49.7129	13.7844	42.2896	173.131	154.482	60.3323	291.312	342.918
MSTRG.13735	83.8408	2.97218	0.640108	4.64325	3.42974e-06	0.000230213	Up	24.4831	32.8521	11.4722	5.16915	21.1448	45.5609	291.41	236.464	40.4875	129.364
MSTRG.17825	94.1378	2.35651	0.508894	4.63065	3.64525e-06	0.000242493	Up	22.4429	43.4118	40.1527	21.5381	26.431	156.309	165.015	33.0854	136.275	296.717
HHLG21g0074	16.1771	-7.51971	1.62578	-4.6253	3.7406e-06	0.000248393	Down	107.114	0	13.3842	13.7844	27.4882	0	0	0	0	0
HHLG50g0426	32.6844	4.41907	0.959765	4.60432	4.13808e-06	0.000272842	Up	0	4.69316	4.78009	0	5.2862	9.11218	101.818	12.6503	87.8874	100.617
HHLG26g0122	22.1404	4.17657	0.907904	4.60024	4.2201e-06	0.000277269	Up	4.08052	0	3.82407	3.4461	0	31.5422	45.6425	6.81171	31.6	94.4565
MSTRG.23737	305.045	-3.54221	0.771807	-4.5895	4.44306e-06	0.000290892	Down	1809.71	170.127	219.884	113.721	495.845	35.0468	46.8129	133.315	17.775	8.21361
MSTRG.2588	17.8879	7.59071	1.65643	4.58257	4.59295e-06	0.000300177	Up	0	0	0	0	0	0	21.0658	5.83861	77.0249	74.9492
HHLG28g0564	7.07466	-6.32473	1.38219	-4.57589	4.742e-06	0.000308835	Down	18.3623	15.2528	2.86805	12.0614	22.202	0	0	0	0	0
MSTRG.12360	75.0179	2.69873	0.589836	4.57539	4.75336e-06	0.000309035	Up	36.7247	17.5994	21.0324	16.369	8.45792	189.954	49.1535	42.8165	271.562	96.5099
MSTRG.10629	57.3467	-9.34537	2.0502	-4.55827	5.15764e-06	0.000331844	Down	272.375	63.3577	0	154.213	83.5219	0	0	0	0	0
MSTRG.11910	271.457	-3.105	0.684956	-4.53313	5.81146e-06	0.000371346	Down	1628.13	160.741	277.245	123.198	242.108	12.6169	87.7741	76.875	48.3875	57.4953
MSTRG.14078	56.9525	2.47617	0.546201	4.53344	5.80295e-06	0.000371346	Up	9.18117	10.5596	25.8125	14.6459	26.431	65.1871	60.8567	36.0047	142.2	178.646
MSTRG.23864	133.705	2.05764	0.454682	4.52545	6.02682e-06	0.000384447	Up	31.624	50.4515	28.6805	69.7836	78.2357	166.122	332.371	72.0095	218.237	289.53
HHLG25g0240	32.0003	2.54519	0.563107	4.51991	6.18656e-06	0.000393962	Up	9.18117	14.0795	4.78009	10.3383	8.45792	22.43	104.159	50.6013	65.1749	30.801
MSTRG.1739	154.962	2.20349	0.487875	4.51651	6.28681e-06	0.000398982	Up	49.9864	55.1447	56.405	43.9378	70.8351	44.86	397.909	228.679	201.45	400.414
MSTRG.23955	1363.6	2.8165	0.62416	4.51246	6.40786e-06	0.000405284	Up	303.999	127.889	1010.51	108.552	143.785	914.723	3255.83	1661.08	1223.51	4886.07
HHLG39g0440	7.07822	6.25288	1.39224	4.49123	7.08127e-06	0.000444105	Up	0	0	0	0	0	8.41124	10.5329	25.3006	3.95	22.5874
MSTRG.29162	111.384	-2.39671	0.534415	-4.48474	7.30034e-06	0.000456308	Down	248.912	91.5167	278.201	109.414	207.219	18.9253	77.2412	43.7896	9.87499	28.7476
HHLG36g0263	35.2789	2.09855	0.469189	4.47272	7.72321e-06	0.000479521	Up	14.2818	9.38633	13.3842	14.6459	14.8014	31.5422	53.8348	36.9778	60.2374	103.697
MSTRG.789	1698.24	2.00881	0.449296	4.47102	7.7846e-06	0.000482528	Up	1689.34	326.175	403.439	395.44	565.623	2997.91	1582.27	2179.75	3530.31	3312.14
MSTRG.27530	492.133	2.06957	0.465463	4.44627	8.73748e-06	0.000534478	Up	95.8922	281.59	193.116	132.675	244.222	1420.8	334.712	342.532	1266.96	608.834
MSTRG.21742	335.398	2.60569	0.586562	4.44232	8.89961e-06	0.000542614	Up	42.8455	104.423	187.379	41.3532	97.266	89.7199	589.842	313.339	1171.17	716.638
MSTRG.1740	106.777	2.48976	0.56222	4.42845	9.49116e-06	0.000574918	Up	44.8857	35.1987	41.1088	18.9536	21.1448	32.2431	381.525	143.046	114.55	235.115
MSTRG.25718	49.0356	3.32183	0.750395	4.42677	9.56533e-06	0.00057847	Up	8.16104	8.21304	12.4282	15.5075	0	15.4206	56.1754	70.0633	168.862	135.525
MSTRG.13267	10103.8	3.96834	0.896864	4.42468	9.65858e-06	0.000583162	Up	289.717	1815.08	542.062	965.77	2454.91	10094.9	1780.06	3488.57	44318	35288.8
HHLG9g0672	34.8694	-2.44595	0.553078	-4.42244	9.75939e-06	0.000588295	Down	30.6039	43.4118	88.9096	87.0141	45.4613	21.729	5.85161	10.7041	9.87499	5.13351
MSTRG.13942	44.3928	2.75119	0.622412	4.42021	9.86039e-06	0.000593423	Up	12.2416	0	15.2963	13.7844	15.8586	153.505	64.3677	62.2785	56.2874	50.3084
HHLG22g0507	32.9944	5.01856	1.13565	4.41909	9.91172e-06	0.000595551	Up	0	0	0	9.47678	0	88.318	12.8735	36.9778	63.1999	119.097
HHLG24g0613	6.61332	6.15335	1.39489	4.41135	1.0273e-05	0.000616264	Up	0	0	0	0	0	7.00937	14.0439	17.5158	3.95	23.6141
MSTRG.13389	51.0338	3.0179	0.684828	4.4068	1.04911e-05	0.000626322	Up	0	7.03975	18.1643	13.7844	16.9158	70.7946	56.1754	43.7896	95.7874	187.886
MSTRG.16180	86.1514	2.64943	0.601538	4.40443	1.06064e-05	0.000632195	Up	45.9059	11.7329	22.9444	20.6766	16.9158	59.5796	324.179	96.337	41.475	221.768
MSTRG.21127	249.816	2.60477	0.59204	4.39965	1.08425e-05	0.000641136	Up	79.5701	106.769	63.0972	4.30763	99.3805	208.879	576.969	223.813	547.074	588.3
MSTRG.20722	35.3757	3.61017	0.820848	4.3981	1.09204e-05	0.000644718	Up	8.16104	0	0	6.89221	11.6296	37.8506	35.1096	128.449	41.475	84.1895
MSTRG.28259	23.3694	4.29603	0.980046	4.3835	1.16786e-05	0.000687302	Up	6.12078	0	0	0	5.2862	39.9534	64.3677	10.7041	39.5	67.7623
MSTRG.21522	6.49841	6.12635	1.39858	4.38039	1.18465e-05	0.000696086	Up	0	0	0	0	0	2.80375	15.2142	15.5696	10.8625	20.534
HHLG31g0236	39.264	2.97814	0.679978	4.37976	1.18812e-05	0.000697022	Up	12.2416	9.38633	11.4722	6.89221	4.22896	59.5796	77.2412	159.589	8.88749	43.1215
MSTRG.13715	776.891	2.62603	0.600058	4.37629	1.20718e-05	0.00070709	Up	198.925	342.601	102.294	159.382	280.168	534.815	265.663	485.578	3205.42	2194.06
MSTRG.20184	394.092	2.09829	0.479529	4.37572	1.2103e-05	0.000707425	Up	282.576	98.5564	141.491	115.444	107.838	227.104	511.431	306.527	955.899	1194.05
MSTRG.15269	863.903	2.59339	0.592827	4.37461	1.21651e-05	0.000708653	Up	212.187	253.431	161.567	221.412	379.549	1338.79	175.548	404.81	3235.05	2256.69
HHLG9g0851	14.2504	4.8847	1.11722	4.37219	1.23004e-05	0.000714861	Up	0	0	0	4.30763	0	11.215	32.769	17.5158	33.575	43.1215
MSTRG.7888	70.5428	-9.64404	2.20682	-4.37011	1.24185e-05	0.000720602	Down	15.302	347.294	191.204	151.629	0	0	0	0	0	0
MSTRG.24779	70.2243	2.23333	0.511277	4.36814	1.25311e-05	0.000726006	Up	32.6442	29.3323	17.2083	24.9842	19.0303	125.468	196.614	160.562	28.6375	67.7623
MSTRG.4012	203.358	-2.2155	0.507975	-4.36143	1.29217e-05	0.000746315	Down	826.305	99.7297	200.764	171.444	375.32	86.9162	52.6645	73.9557	60.2374	86.2429
MSTRG.28505	51.266	2.6036	0.59759	4.35684	1.31955e-05	0.0007586	Up	7.14091	7.03975	21.9884	13.7844	22.202	24.5328	129.906	49.6282	70.1124	166.326
HHLG12g0247	10.3147	6.79925	1.56507	4.34439	1.39664e-05	0.00079555	Up	0	0	0	0	0	26.6356	0	26.2737	27.65	22.5874
MSTRG.15101	1070.87	2.53732	0.585371	4.33455	1.46058e-05	0.000829437	Up	137.718	239.351	103.25	769.342	323.515	1352.11	627.292	704.525	3340.71	3110.91
MSTRG.3464	15.5209	5.19147	1.19893	4.33009	1.4905e-05	0.000841295	Up	0	0	0	0	4.22896	9.81312	51.4941	22.3813	11.85	55.4419
MSTRG.21991	37.6642	3.61576	0.837028	4.31977	1.56194e-05	0.000876309	Up	4.08052	14.0795	10.5162	0	0	49.7665	128.735	75.9019	48.3875	45.1749
MSTRG.623	33.3079	4.68684	1.08518	4.31895	1.56773e-05	0.000878236	Up	10.2013	2.34658	0	0	0	11.215	95.9664	18.4889	82.9499	111.91
MSTRG.3279	53.9555	3.56655	0.826878	4.31327	1.60858e-05	0.000895862	Up	9.18117	0	0	14.6459	17.9731	39.9534	113.521	66.1709	106.65	171.459
MSTRG.14200	7.01633	6.2356	1.44653	4.31074	1.62706e-05	0.000903319	Up	0	0	0	0	0	2.10281	28.0877	7.78481	16.7875	15.4005
MSTRG.6686	341.473	2.43982	0.566711	4.30523	1.66811e-05	0.000923606	Up	38.7649	124.369	90.8217	99.937	177.616	276.87	303.113	178.078	571.762	1553.4
MSTRG.11012	62.1033	3.93995	0.91792	4.29226	1.76867e-05	0.000971801	Up	20.4026	0	4.78009	4.30763	8.45792	105.841	4.68129	53.5206	99.7374	319.304
MSTRG.2320	115.457	-2.41201	0.562832	-4.28549	1.82335e-05	0.000998491	Down	133.637	137.275	304.014	80.9834	316.115	22.43	9.36257	35.0316	84.9249	30.801
MSTRG.6246	173.376	2.1585	0.503673	4.28552	1.82309e-05	0.000998491	Up	69.3688	25.8124	68.8333	66.3375	86.6936	181.543	105.329	177.104	673.474	279.263
MSTRG.1111	29.2477	3.43044	0.802009	4.27731	1.89167e-05	0.00103178	Up	5.10065	0	7.64814	3.4461	8.45792	8.41124	126.395	56.4399	36.5375	40.0414
HHLG41g0779	6.11178	6.03849	1.41218	4.276	1.90283e-05	0.00103635	Up	0	0	0	0	0	4.90656	12.8735	9.73101	6.91249	26.6942
MSTRG.6401	351.78	-2.60473	0.611213	-4.26157	2.02992e-05	0.00109914	Down	1997.41	150.181	312.618	198.151	362.633	86.2152	125.224	117.745	96.7749	70.8424
MSTRG.29115	11.6715	6.97271	1.6374	4.2584	2.05894e-05	0.00111162	Up	0	0	0	0	0	0	56.1754	27.2468	14.8125	18.4806
MSTRG.12350	49.239	-2.06604	0.486058	-4.2506	2.13196e-05	0.00114094	Down	46.926	63.3577	78.3935	69.7836	139.556	23.1309	4.68129	23.3544	23.7	19.5073
MSTRG.25821	23.818	4.83296	1.14004	4.23929	2.24224e-05	0.00118819	Up	0	0	3.82407	0	4.22896	2.80375	127.565	27.2468	35.55	36.9613
MSTRG.20591	1524.48	-4.2255	0.996872	-4.23876	2.24761e-05	0.00118931	Down	9919.75	495.129	1884.31	166.274	2005.58	41.3553	239.916	351.29	63.1999	78.0293
MSTRG.28935	50.9571	3.74147	0.88342	4.23522	2.28331e-05	0.00120482	Up	14.2818	11.7329	0	9.47678	0	12.6169	106.499	103.149	122.45	129.364
MSTRG.18773	1232.24	4.15675	0.982084	4.23258	2.31023e-05	0.0012173	Up	93.852	188.9	60.2291	86.1526	225.192	796.264	120.543	178.078	6150.14	4423.03
HHLG4g0375	5.707	5.94067	1.40673	4.22303	2.41038e-05	0.00126827	Up	0	0	0	0	0	5.60749	14.0439	20.4351	11.85	5.13351
MSTRG.27157	13.814	-3.26669	0.774316	-4.21881	2.45598e-05	0.00128863	Down	30.6039	11.7329	21.0324	27.5688	33.8317	0	2.34064	1.9462	3.95	5.13351
MSTRG.27797	7.23481	6.28058	1.48992	4.21538	2.49359e-05	0.00130469	Up	0	0	0	0	0	7.00937	39.7909	16.5427	5.92499	3.0801
MSTRG.16069	16378.5	2.8207	0.669746	4.2116	2.53573e-05	0.00132302	Up	782.44	9225.59	1382.4	2004.77	6913.29	8088.11	13208.2	14166.4	66483.4	41530.1
MSTRG.26849	20.2188	4.74231	1.12704	4.20776	2.57919e-05	0.00134381	Up	0	0	0	6.89221	0	14.0187	31.5987	24.3275	49.375	75.9759
MSTRG.18644	65.5342	2.86606	0.681299	4.20676	2.59058e-05	0.00134786	Up	28.5636	15.2528	5.73611	4.30763	25.3737	65.1871	244.597	127.476	19.75	119.097
MSTRG.19963	25.4275	2.87693	0.684451	4.20326	2.63094e-05	0.00136315	Up	11.2214	0	9.56018	5.16915	4.22896	20.3272	49.1535	35.0316	39.5	80.0827
HHLG47g0161	38.2121	2.33257	0.556071	4.19474	2.73188e-05	0.00141152	Up	16.3221	23.4658	7.64814	12.0614	4.22896	110.748	35.1096	52.5475	80.9749	39.0147
MSTRG.19956	975.457	3.01906	0.721313	4.18551	2.84526e-05	0.00146604	Up	47.9461	443.504	171.127	98.2139	310.828	2395.8	253.96	298.742	4647.17	1087.28
MSTRG.20554	1066.24	2.12196	0.5075	4.18121	2.89962e-05	0.00149198	Up	278.496	515.075	378.583	215.381	604.741	1044.4	496.216	900.119	4102.07	2127.33
MSTRG.605	9.57305	-5.56412	1.33147	-4.17894	2.92874e-05	0.00150489	Down	46.926	18.7727	5.73611	13.7844	8.45792	0	0	0	0	2.0534
HHLG36g0221	6.10335	6.04146	1.45072	4.16446	3.12087e-05	0.00158395	Up	0	0	0	0	0	9.11218	4.68129	21.4082	21.725	4.10681
MSTRG.22803	731.482	2.49943	0.600743	4.16057	3.17453e-05	0.00160899	Up	42.8455	355.507	156.787	256.735	287.569	1363.32	472.81	281.226	2911.15	1186.87
MSTRG.11811	778.648	2.01954	0.485807	4.15708	3.22343e-05	0.00163156	Up	256.053	436.464	194.072	242.95	411.266	592.993	774.753	476.82	3112.6	1288.51
MSTRG.9381	187.764	2.05151	0.493742	4.15502	3.25254e-05	0.00164406	Up	28.5636	127.889	95.6018	78.3988	34.8889	643.46	234.064	201.432	256.75	176.593
MSTRG.13351	405.248	-2.40483	0.581316	-4.13687	3.52072e-05	0.0017724	Down	2095.35	202.979	326.002	322.211	462.014	79.9068	147.461	217.002	93.8124	105.75
HHLG9g0959	42.1748	-2.2194	0.536553	-4.1364	3.52798e-05	0.00177365	Down	65.2883	56.318	32.5046	81.8449	112.067	28.0375	4.68129	12.6503	9.87499	18.4806
HHLG18g0239	7.78342	-6.45913	1.56167	-4.13603	3.53361e-05	0.00177409	Down	5.10065	51.6248	4.78009	2.58458	13.7441	0	0	0	0	0
MSTRG.28804	18.453	4.07981	0.98759	4.13108	3.61065e-05	0.00180547	Up	0	4.69316	5.73611	0	0	22.43	31.5987	20.4351	24.6875	74.9492
MSTRG.26626	169.784	-2.38705	0.578878	-4.12358	3.73025e-05	0.00185779	Down	691.648	183.033	166.347	39.6302	344.66	62.3834	79.5819	43.7896	38.5125	48.255
MSTRG.10005	181.52	2.65877	0.648296	4.10116	4.11085e-05	0.00202836	Up	37.7448	35.1987	54.493	55.1376	65.5489	427.571	29.258	62.2785	628.049	419.921
MSTRG.10614	86.4898	5.81757	1.41844	4.1014	4.10658e-05	0.00202836	Up	0	0	11.4722	3.4461	0	88.318	63.1974	26.2737	59.2499	612.941
MSTRG.6652	148.336	2.4951	0.608624	4.09957	4.13917e-05	0.00203694	Up	43.8656	68.0509	34.4166	17.2305	60.2627	87.6171	92.4554	94.3908	634.962	350.105
HHLG50g0292	5.39639	5.85823	1.43097	4.0939	4.2418e-05	0.00207921	Up	0	0	0	0	0	6.30843	16.3845	5.83861	5.92499	19.5073
MSTRG.12060	161.313	3.65883	0.895309	4.08667	4.37617e-05	0.00213384	Up	5.10065	5.86646	24.8565	47.3839	34.8889	144.393	11.7032	40.8703	276.5	1021.57
MSTRG.28866	29.0123	2.32025	0.567745	4.08678	4.37407e-05	0.00213384	Up	8.16104	14.0795	13.3842	8.61526	4.22896	58.8787	77.2412	45.7358	45.425	14.3738
MSTRG.20117	252.9	-2.89089	0.708792	-4.07861	4.53058e-05	0.00220336	Down	1542.44	73.9173	225.62	124.06	262.195	23.1309	67.8787	82.7136	32.5875	94.4565
MSTRG.27685	145.827	3.00247	0.736476	4.07681	4.56586e-05	0.00221763	Up	25.5033	56.318	50.6689	0	29.6027	183.645	114.692	123.584	477.95	396.307
MSTRG.1813	57.9027	2.92045	0.71705	4.07288	4.64359e-05	0.00224951	Up	15.302	14.0795	13.3842	12.0614	12.6869	11.215	119.373	27.2468	65.1749	288.503
MSTRG.29028	18.561	5.36569	1.31789	4.07143	4.67246e-05	0.00225179	Up	0	4.69316	0	0	0	11.215	49.1535	1.9462	64.1874	54.4152
MSTRG.13706	6.45135	6.11856	1.50431	4.06735	4.755e-05	0.00228861	Up	0	0	0	0	0	2.10281	4.68129	11.6772	29.625	16.4272
MSTRG.27338	10.1927	5.00964	1.23331	4.06194	4.86672e-05	0.00233333	Up	0	0	0	0	3.17172	35.0468	7.02193	23.3544	13.825	19.5073
MSTRG.24358	947.657	-2.92702	0.721469	-4.05703	4.97003e-05	0.0023737	Down	5686.21	343.774	768.638	288.611	1287.72	78.5049	370.992	407.729	128.375	116.017
MSTRG.5352	221.134	2.13295	0.526267	4.05297	5.05707e-05	0.00240766	Up	142.818	51.6248	117.59	51.6915	46.5185	131.776	737.303	312.365	141.212	478.443
MSTRG.8147	70.252	2.06976	0.511385	4.04736	5.17975e-05	0.00246124	Up	26.5234	35.1987	24.8565	18.9536	29.6027	44.86	257.471	50.6013	106.65	107.804
MSTRG.26450	102.396	2.23226	0.551627	4.04669	5.19476e-05	0.00246352	Up	8.16104	25.8124	17.2083	68.9221	59.2054	80.6077	169.697	124.557	243.912	225.874
MSTRG.20222	17.5049	2.83463	0.700556	4.04625	5.20438e-05	0.00246352	Up	8.16104	5.86646	0	3.4461	4.22896	22.43	24.5768	49.6282	19.75	36.9613
HHLG5g0945	5.35769	-5.92905	1.46742	-4.04045	5.33492e-05	0.00251572	Down	6.12078	5.86646	4.78009	24.1227	12.6869	0	0	0	0	0
MSTRG.543	16.0748	4.66441	1.15519	4.0378	5.39552e-05	0.00253467	Up	6.12078	0	0	0	0	21.0281	40.9613	60.3323	13.825	18.4806
HHUNg1330	11.8594	6.99563	1.73746	4.02636	5.66462e-05	0.00264338	Up	0	0	0	0	0	0	70.2193	13.6234	3.95	30.801
MSTRG.29087	113.19	-2.50868	0.624897	-4.01456	5.95571e-05	0.00276644	Down	147.919	48.1049	233.268	261.042	271.711	6.30843	60.8567	64.2247	13.825	24.6408
HHLG32g0533	27.4829	-2.29021	0.571696	-4.006	6.17555e-05	0.00285078	Down	58.1474	29.3323	70.7453	32.738	38.0606	21.0281	5.85161	4.86551	7.89999	6.16021
MSTRG.9401	33.5855	2.84177	0.711718	3.99283	6.52901e-05	0.00298436	Up	5.10065	16.4261	0	10.3383	9.51516	61.6824	25.7471	107.041	67.1499	32.8544
MSTRG.7412	92.4435	-2.27519	0.571558	-3.98067	6.87204e-05	0.00312581	Down	395.81	78.6105	76.4814	80.1219	135.327	31.5422	22.2361	59.3592	31.6	13.3471
MSTRG.2721	104.2	2.23256	0.561719	3.97452	7.05223e-05	0.00319996	Up	17.3422	73.9173	28.6805	9.47678	53.9192	107.944	314.817	77.8481	187.625	170.432
MSTRG.2592	23.841	4.83433	1.2167	3.97333	7.08747e-05	0.00321204	Up	0	0	3.82407	0	4.22896	4.20562	154.482	8.75791	18.7625	44.1482
MSTRG.19248	105.395	3.1016	0.78244	3.96401	7.3701e-05	0.00333229	Up	6.12078	0	45.8888	35.3226	22.202	51.1684	420.145	154.723	204.412	113.964
HHLG50g0680	25.0302	-4.37063	1.10258	-3.96399	7.37071e-05	0.00333229	Down	115.275	28.159	26.7685	6.89221	61.3199	0	7.02193	4.86551	0	0
MSTRG.23038	177.704	2.07736	0.52563	3.95213	7.74602e-05	0.00348085	Up	32.6442	55.1447	116.634	63.7529	71.8923	40.6543	395.569	307.5	356.487	336.758
MSTRG.28967	60.9567	2.30073	0.584188	3.93834	8.20466e-05	0.00365608	Up	3.06039	35.1987	15.2963	34.461	14.8014	76.4021	81.9225	71.0364	73.0749	204.314
MSTRG.13936	106.303	2.79542	0.710335	3.93536	8.30723e-05	0.00369295	Up	41.8253	29.3323	35.3727	0	27.4882	63.0843	190.762	124.557	354.512	196.1
MSTRG.21493	71.9227	-3.68664	0.93768	-3.93166	8.43612e-05	0.00373893	Down	9.18117	415.345	121.414	91.3217	30.6599	24.5328	0	5.83861	15.8	5.13351
MSTRG.22189	1093.22	-2.6245	0.667551	-3.93153	8.44078e-05	0.00373893	Down	6528.83	334.388	991.39	437.655	1114.33	187.851	338.223	465.142	167.875	366.532
MSTRG.26645	33.0606	2.5153	0.640095	3.92957	8.50983e-05	0.00376504	Up	14.2818	9.38633	7.64814	15.5075	2.11448	14.0187	67.8787	44.7627	52.3375	102.67
[truncated: 225 more rows]

## Sheet: S7
Supplementary Table 7. The GO terms of Hebao red carp muscle under hypoxia stress
[truncated: 32 more rows]

[truncated: 42 more sheets: S8, S9, S10, S11, S12, S13, S14, S15, S16, S17, S18, S19, S20, S21, S22, S23, S24, S25, S26, S27 …]
